# Supplementary material for: Widespread mRNA polyadenylation events in introns indicate dynamic interplay between polyadenylation and splicing
Source: HighWire-hosted journal article supplement (doi:10.1101/gr.5532707), 2007-01-08
Supplement: sTable3_0102.pdf [file sTable3_0102.pdf]

| Supplemental Table 3 |                           |              |      |              |      |        |         |              |                                                                         |
|----------------------|---------------------------|--------------|------|--------------|------|--------|---------|--------------|-------------------------------------------------------------------------|
| Site ID              | Intron                    | Poly(A) site | Type | NM/KG        | Inum | Region | Gene ID | Gene Symbol  | Gene Annotation                                                         |
| Hs.120277.1.10       | chr3:170997234:170996860  | 170996950    | b    | NM_153353    | 7    | CDS    | 151827  | LRRC34       | leucine rich repeat containing 34                                       |
| Hs.134470.1.27       | chr17:53059664:53084458   | 53065543     | b    | NM_138962    | 10   | CDS    | 124540  | MSI2         | musashi homolog 2 (Drosophila)                                          |
| Hs.162889.1.18       | chr14:80367239:80329208   | 80366262     | b    | NM_152446    | 12   | CDS    | 145508  | C14orf145    | chromosome 14 open reading frame 145                                    |
| Hs.187898.1.27       | chr22:28403623:28415294   | 28404458     | b    | NM_181832    | 16   | 3UTR   | 4771    | NF2          | neurofibromin 2 (bilateral acoustic neuroma)                            |
| Hs.228320.1.6        | chr10:115527009:115530350 | 115527470    | b    | BC036365     | 5    | CDS    | 79949   | C10orf81     | chromosome 10 open reading frame 81                                     |
| Hs.266308.1.2        | chr11:117279579:117278191 | 117278967    | b    | NM_032046    | 12   | CDS    | 84000   | TMPRSS13     | transmembrane protease, serine 13                                       |
| Hs.266308.1.4        | chr11:117284536:117281662 | 117283722    | b    | NM_032046    | 9    | CDS    | 84000   | TMPRSS13     | transmembrane protease, serine 13                                       |
| Hs.2689.1.4          | chr10:53492398:53563605   | 53492622     | b    | NM_006258    | 7    | CDS    | 5592    | PRKG1        | protein kinase, cGMP-dependent, type I                                  |
| Hs.280781.1.6        | chr18:64715646:64829150   | 64715837     | b    | NM_024781    | 4    | CDS    | 79839   | C18orf14     | chromosome 18 open reading frame 14                                     |
| Hs.305985.2.25       | chr12:8983686:8984438     | 8983942      | b    | BX640639     | 17   | 3UTR   | NA      | NA           | NA                                                                      |
| Hs.312098.1.36       | chr1:151843991:151844258  | 151844232    | b    | NM_003815    | 15   | CDS    | 8751    | ADAM15       | a disintegrin and metalloproteinase domain 15 (metargidin)              |
| Hs.314338.1.11       | chr21:39490293:39481214   | 39487623     | b    | NM_018963    | 41   | CDS    | 54014   | BRWD1        | bromodomain and WD repeat domain containing 1                           |
| Hs.33368.1.3         | chr15:92685158:92689361   | 92688314     | b    | NM_018349    | 6    | CDS    | 55784   | MCTP2        | multiple C2-domains with two transmembrane regions 2                    |
| Hs.346736.1.21       | chr2:99270738:99281614    | 99272414     | b    | AK126402     | 10   | 3UTR   | 51263   | MRPL30       | mitochondrial ribosomal protein L30                                     |
| Hs.445061.1.19       | chr16:69322898:69290216   | 69322712     | b    | NM_018052    | 14   | CDS    | 55697   | VAC14        | Vac14 homolog (S. cerevisiae)                                           |
| Hs.465061.1.12       | chr18:43625708:43622320   | 43625678     | b    | NM_001003652 | 10   | CDS    | 4087    | SMAD2        | SMAD, mothers against DPP homolog 2 (Drosophila)                        |
| Hs.480068.1.11       | chr4:82734983:82726618    | 82729226     | b    | NM_152545    | 4    | CDS    | 153020  | RASGEF1B     | RasGEF domain family, member 1B                                         |
| Hs.481361.1.17       | chr4:187463566:187468216  | 187463958    | b    | NM_001006655 | 13   | CDS    | 25854   | DKFZP564J102 | DKFZP564J102 protein                                                    |
| Hs.496684.1.15       | chrX:119357466:119347200  | 119354582    | b    | NM_002294    | 8    | CDS    | 3920    | LAMP2        | lysosomal-associated membrane protein 2                                 |
| Hs.501012.1.14       | chr10:111868485:111868958 | 111868688    | b    | NM_001121    | 6    | CDS    | 120     | ADD3         | adducin 3 (gamma)                                                       |
| Hs.502328.1.13       | chr11:35168189:35192974   | 35168365     | b    | NM_001001391 | 5    | CDS    | 960     | CD44         | CD44 antigen (homing function and Indian blood group system)            |
| Hs.512461.1.17       | chr9:129949373:129966747  | 129950152    | b    | NM_020960    | 14   | CDS    | 57720   | GPR107       | G protein-coupled receptor 107                                          |
| Hs.512676.1.10       | chr11:118393877:118393466 | 118393618    | b    | NM_001028    | 2    | CDS    | 6230    | RPS25        | ribosomal protein S25                                                   |
| Hs.523360.1.15       | chr10:134390400:134413010 | 134390839    | b    | NM_005539    | 9    | CDS    | 3632    | INPP5A       | inositol polyphosphate-5-phosphatase, 40kDa                             |
| Hs.523360.1.24       | chr10:134441277:134444342 | 134441371    | b    | Z31695       | 12   | CDS    | 3632    | INPP5A       | inositol polyphosphate-5-phosphatase, 40kDa                             |
| Hs.527874.1.36       | chr12:70336931:70327861   | 70336390     | b    | NM_144982    | 2    | CDS    | 196441  | MGC23401     | hypothetical protein MGC23401                                           |
| Hs.529303.1.16       | chr2:218929080:218929619  | 218929420    | b    | NM_005731    | 5    | CDS    | 10109   | ARPC2        | actin related protein 2/3 complex, subunit 2, 34kDa                     |
| Hs.531785.1.11       | chr2:20745283:20740634    | 20743575     | b    | NM_022460    | 6    | CDS    | 64342   | HS1BP3       | HS1-binding protein 3                                                   |
| Hs.549079.1.1        | chr7:71886910:72190310    | 71887445     | b    | NM_003602    | 4    | CDS    | 8468    | FKBP6        | FK506 binding protein 6, 36kDa                                          |
| Hs.6449.1.25         | chr1:1296298:1290922      | 1294012      | b    | AK021939     | 2    | CDS    | 54973   | CPSF3L       | cleavage and polyadenylation specific factor 3-like                     |
| Hs.100299.1.13       | chr17:30340796:30342094   | 30340956     | c    | NM_002311    | 4    | CDS    | 3980    | LIG3         | ligase III, DNA, ATP-dependent                                          |
| Hs.100299.1.14       | chr17:30340796:30342094   | 30341012     | c    | NM_002311    | 4    | CDS    | 3980    | LIG3         | ligase III, DNA, ATP-dependent                                          |
| Hs.100299.1.15       | chr17:30340796:30342094   | 30341167     | c    | NM_002311    | 4    | CDS    | 3980    | LIG3         | ligase III, DNA, ATP-dependent                                          |
| Hs.100743.1.7        | chr2:159020745:158995915  | 159020613    | c    | NM_138803    | 7    | CDS    | 130940  | LOC130940    | hypothetical protein BC015395                                           |
| Hs.100914.1.47       | chr18:13104251:13106375   | 13104624     | c    | NM_018069    | 36   | 3UTR   | 55125   | Cep192       | centrosomal protein 192 kDa                                             |
| Hs.101014.1.16       | chr11:95194791:95200597   | 95195305     | c    | D42054       | 7    | CDS    | 9702    | PIG8         | translokine                                                             |
| Hs.101014.1.18       | chr11:95195389:95200597   | 95196027     | c    | NM_014679    | 8    | CDS    | 9702    | PIG8         | translokine                                                             |
| Hs.101302.1.17       | chr6:75879639:75875604    | 75879458     | c    | NM_004370    | 51   | CDS    | 1303    | COL12A1      | collagen, type XII, alpha 1                                             |
| Hs.101439.1.10       | chr9:121831027:121816813  | 121830743    | c    | NM_194252    | 3    | CDS    | 158135  | TTLL11       | tubulin tyrosine ligase-like family, member 11                          |
| Hs.101480.1.35       | chr17:33018868:33011825   | 33018543     | c    | NM_007247    | 6    | CDS    | 11276   | AP1GBP1      | AP1 gamma subunit binding protein 1                                     |
| Hs.101791.1.3        | chr3:10840078:10860898    | 10842183     | c    | NM_014229    | 4    | CDS    | 6538    | SLC6A11      | solute carrier family 6 (neurotransmitter transporter, GABA), member 11 |
| Hs.101840.1.13       | chr1:177754471:177756017  | 177754813    | c    | NM_001531    | 5    | CDS    | 3140    | MR1          | major histocompatibility complex, class I-related                       |

|                |                           |           |   |              |    |      |        |           |                                                                                 |
|----------------|---------------------------|-----------|---|--------------|----|------|--------|-----------|---------------------------------------------------------------------------------|
| Hs.102798.1.21 | chr11:14589087:14497164   | 14588943  | c | NM_148976    | 2  | CDS  | 5682   | PSMA1     | proteasome (prosome, macropain) subunit, alpha type, 1                          |
| Hs.102914.1.20 | chrX:119448158:119445992  | 119448073 | c | NM_003588    | 20 | CDS  | 8450   | CUL4B     | cullin 4B                                                                       |
| Hs.102929.1.33 | chr3:48693723:48692667    | 48693630  | c | NM_016453    | 5  | CDS  | 51517  | NCKIPSD   | NCK interacting protein with SH3 domain                                         |
| Hs.103183.1.25 | chrX:146732683:146735799  | 146732780 | c | M67468       | 15 | CDS  | 2332   | FMR1      | fragile X mental retardation 1                                                  |
| Hs.103527.1.4  | chr1:153590039:153589439  | 153589922 | c | NM_003975    | 8  | 3UTR | 9047   | SH2D2A    | SH2 domain protein 2A                                                           |
| Hs.104123.1.7  | chrX:12587923:12597282    | 12588145  | c | NM_002765    | 4  | CDS  | 5634   | PRPS2     | phosphoribosyl pyrophosphate synthetase 2                                       |
| Hs.104672.1.15 | chr3:101315586:101132565  | 101313731 | c | NM_182909    | 1  | 5UTR | 11259  | DOC1      | downregulated in ovarian cancer 1                                               |
| Hs.104806.1.4  | chr20:3750941:3752517     | 3751143   | c | NM_018347    | 2  | CDS  | 55317  | C20orf29  | chromosome 20 open reading frame 29                                             |
| Hs.10499.1.26  | chr16:57271261:57270300   | 57271015  | c | NM_018231    | 3  | CDS  | 55238  | FLJ10815  | amino acid transporter                                                          |
| Hs.105016.1.16 | chr1:70470091:70454549    | 70469850  | c | NM_030816    | 9  | CDS  | 81573  | ANKRD13C  | ankyrin repeat domain 13C                                                       |
| Hs.105134.1.12 | chrX:131244225:131241836  | 131243943 | c | NM_018388    | 6  | CDS  | 55796  | MBNL3     | muscleblind-like 3 (Drosophila)                                                 |
| Hs.105153.1.3  | chr3:20187219:20177723    | 20185982  | c | NM_001012410 | 8  | CDS  | 151648 | SGOL1     | shugoshin-like 1 (S. pombe)                                                     |
| Hs.105153.1.4  | chr3:20187219:20177723    | 20186549  | c | NM_001012410 | 8  | CDS  | 151648 | SGOL1     | shugoshin-like 1 (S. pombe)                                                     |
| Hs.105153.1.8  | chr3:20187219:20177723    | 20186990  | c | NM_001012410 | 8  | CDS  | 151648 | SGOL1     | shugoshin-like 1 (S. pombe)                                                     |
| Hs.105818.1.16 | chr5:133730566:133730135  | 133730168 | c | BC041799     | 1  | 5UTR | 51265  | CDKL3     | cyclin-dependent kinase-like 3                                                  |
| Hs.105818.1.7  | chr5:133671727:133670293  | 133671469 | c | BC041799     | 9  | CDS  | 51265  | CDKL3     | cyclin-dependent kinase-like 3                                                  |
| Hs.105818.1.8  | chr5:133671727:133670293  | 133671591 | c | BC041799     | 9  | CDS  | 51265  | CDKL3     | cyclin-dependent kinase-like 3                                                  |
| Hs.107101.1.8  | chr1:2153313:2150808      | 2153168   | c | NM_182533    | 4  | CDS  | 199990 | C1orf86   | chromosome 1 open reading frame 86                                              |
| Hs.107149.1.11 | chr1:181825732:181824709  | 181825629 | c | NM_030934    | 12 | CDS  | 81627  | C1orf25   | chromosome 1 open reading frame 25                                              |
| Hs.108530.1.16 | chr6:76025215:76022732    | 76024690  | c | NM_018247    | 6  | CDS  | 55754  | TMEM30A   | transmembrane protein 30A                                                       |
| Hs.10941.1.11  | chr2:182807702:182819206  | 182807918 | c | BC017943     | 5  | 3UTR | 151242 | PPP1R1C   | protein phosphatase 1, regulatory (inhibitor) subunit 1C                        |
| Hs.10941.1.12  | chr2:182807702:182819206  | 182807989 | c | BC017943     | 5  | 3UTR | 151242 | PPP1R1C   | protein phosphatase 1, regulatory (inhibitor) subunit 1C                        |
| Hs.109439.1.20 | chr9:92231690:92228134    | 92231478  | c | NM_014057    | 5  | CDS  | 4969   | OGN       | osteoglycin (osteoinductive factor, mimecan)                                    |
| Hs.109520.1.15 | chr13:51889192:51888230   | 51889050  | c | NM_016075    | 12 | CDS  | 51028  | VPS36     | vacuolar protein sorting 36 (yeast)                                             |
| Hs.109590.1.7  | chr4:77550101:77556400    | 77550268  | c | AK124936     | 5  | CDS  | 8987   | GENX-3414 | genethonin 1                                                                    |
| Hs.110445.1.7  | chr7:65900273:65897637    | 65900196  | c | NM_016038    | 4  | CDS  | 51119  | SBDS      | Shwachman-Bodian-Diamond syndrome                                               |
| Hs.11067.1.24  | chr17:70465830:70463647   | 70465662  | c | NM_030630    | 12 | CDS  | 283987 | C17orf28  | chromosome 17 open reading frame 28                                             |
| Hs.111286.1.4  | chr15:86812260:86819344   | 86812490  | c | NM_176805    | 2  | CDS  | 64963  | MRPS11    | mitochondrial ribosomal protein S11                                             |
| Hs.111749.1.1  | chr2:190474826:190482021  | 190475534 | c | NM_000534    | 1  | 5UTR | 5378   | PMS1      | PMS1 postmeiotic segregation increased 1 (S. cerevisiae)                        |
| Hs.111749.1.12 | chr2:190495987:190508248  | 190497286 | c | NM_000534    | 4  | CDS  | 5378   | PMS1      | PMS1 postmeiotic segregation increased 1 (S. cerevisiae)                        |
| Hs.112160.1.17 | chr15:62903029:62901863   | 62902506  | c | NM_025049    | 1  | CDS  | 80119  | C15orf20  | chromosome 15 open reading frame 20                                             |
| Hs.112377.1.4  | chr11:124123495:124122774 | 124123216 | c | NM_014312    | 6  | CDS  | 23584  | VSIG2     | V-set and immunoglobulin domain containing 2                                    |
| Hs.112895.1.10 | chr9:136134055:136131761  | 136133917 | c | NM_144653    | 3  | CDS  | 138151 | BTBD14A   | BTB (POZ) domain containing 14A                                                 |
| Hs.112949.1.16 | chr1:51473771:51472205    | 51473231  | c | AF007170     | 13 | CDS  | 22996  | C1orf34   | chromosome 1 open reading frame 34                                              |
| Hs.11314.1.10  | chr20:34296263:34306913   | 34296691  | c | NM_015511    | 3  | CDS  | 25980  | C20orf4   | chromosome 20 open reading frame 4                                              |
| Hs.11314.1.6   | chr20:34291962:34296032   | 34292188  | c | NM_015511    | 2  | CDS  | 25980  | C20orf4   | chromosome 20 open reading frame 4                                              |
| Hs.113150.1.29 | chr14:35267318:35264111   | 35267297  | c | NM_014990    | 13 | CDS  | 253959 | GARNL1    | GTPase activating Rap/RanGAP domain-like 1                                      |
| Hs.113157.1.7  | chr3:37645832:37670208    | 37646014  | c | NM_002207    | 16 | CDS  | 3680   | ITGA9     | integrin, alpha 9                                                               |
| Hs.11355.1.18  | chr12:97433819:97440475   | 97433959  | c | BC053675     | 4  | CDS  | 7112   | TMPO      | thymopoietin                                                                    |
| Hs.113874.1.16 | chr17:26573074:26574587   | 26573908  | c | NM_000267    | 15 | CDS  | 4763   | NF1       | neurofibromin 1 (neurofibromatosis, von Recklinghausen disease, Watson disease) |
| Hs.113874.1.59 | chr17:26709767:26710112   | 26709791  | c | NM_000267    | 54 | CDS  | 4763   | NF1       | neurofibromin 1 (neurofibromatosis, von Recklinghausen disease, Watson disease) |
| Hs.113874.1.65 | chr17:26711848:26725156   | 26712746  | c | NM_000267    | 56 | CDS  | 4763   | NF1       | neurofibromin 1 (neurofibromatosis, von Recklinghausen disease, Watson disease) |
| Hs.113876.1.31 | chr4:1908737:1920029      | 1909372   | c | NM_014919    | 11 | CDS  | 7468   | WHSC1     | Wolf-Hirschhorn syndrome candidate 1                                            |
| Hs.113912.1.14 | chr4:160611455:160617067  | 160611613 | c | AB002311     | 11 | CDS  | 9693   | RAPGEF2   | Rap guanine nucleotide exchange factor (GEF) 2                                  |

|                |                           |           |   |           |    |      |        |           |                                                                                                                                    |
|----------------|---------------------------|-----------|---|-----------|----|------|--------|-----------|------------------------------------------------------------------------------------------------------------------------------------|
| Hs.113912.1.34 | chr4:160632804:160634609  | 160632875 | c | AB002311  | 22 | CDS  | 9693   | RAPGEF2   | Rap guanine nucleotide exchange factor (GEF) 2                                                                                     |
| Hs.114062.1.7  | chr10:17681294:17676389   | 17681079  | c | NM_014241 | 5  | CDS  | 9200   | PTPLA     | protein tyrosine phosphatase-like (proline instead of catalytic arginine), member a                                                |
| Hs.114198.1.23 | chr15:65849056:65852098   | 65849319  | c | NM_002757 | 19 | CDS  | 5607   | MAP2K5    | mitogen-activated protein kinase kinase 5                                                                                          |
| Hs.114246.1.2  | chrX:47503779:47511497    | 47503863  | c | NM_007137 | 4  | CDS  | 347344 | ZNF81     | zinc finger protein 81 (HFZ20)                                                                                                     |
| Hs.114648.1.18 | chr10:124598742:124595727 | 124598603 | c | NM_022034 | 2  | 5UTR | 50624  | CUZD1     | CUB and zona pellucida-like domains 1                                                                                              |
| Hs.115277.1.19 | chrY:13946928:13943905    | 13946313  | c | NM_007125 | 7  | CDS  | 7404   | UTY       | ubiquitously transcribed tetratricopeptide repeat gene, Y-linked                                                                   |
| Hs.115277.1.20 | chrY:13946928:13943905    | 13946448  | c | NM_007125 | 7  | CDS  | 7404   | UTY       | ubiquitously transcribed tetratricopeptide repeat gene, Y-linked                                                                   |
| Hs.115277.1.25 | chrY:14029264:14020241    | 14028059  | c | NM_007125 | 2  | CDS  | 7404   | UTY       | ubiquitously transcribed tetratricopeptide repeat gene, Y-linked                                                                   |
| Hs.115277.1.7  | chrY:13847717:13810416    | 13847452  | c | NM_007125 | 25 | CDS  | 7404   | UTY       | ubiquitously transcribed tetratricopeptide repeat gene, Y-linked                                                                   |
| Hs.115277.1.8  | chrY:13847717:13810416    | 13847520  | c | NM_007125 | 25 | CDS  | 7404   | UTY       | ubiquitously transcribed tetratricopeptide repeat gene, Y-linked                                                                   |
| Hs.115792.1.7  | chr3:45018105:45021786    | 45018298  | c | NM_015004 | 5  | CDS  | 23016  | EXOSC7    | exosome component 7                                                                                                                |
| Hs.116092.1.6  | chr3:136355817:136363557  | 136356231 | c | NM_004441 | 6  | CDS  | 2047   | EPHB1     | EPH receptor B1                                                                                                                    |
| Hs.116128.1.2  | chr20:43614075:43613666   | 43613815  | c | NM_181510 | 6  | 3UTR | 90199  | WFDC8     | WAP four-disulfide core domain 8                                                                                                   |
| Hs.116250.1.6  | chr4:46104870:46093550    | 46103717  | c | NM_000807 | 10 | CDS  | 2555   | GABRA2    | gamma-aminobutyric acid (GABA) A receptor, alpha 2                                                                                 |
| Hs.116470.1.24 | chr6:25718389:25727653    | 25718474  | c | NM_017640 | 35 | CDS  | 55604  | LRRRC16   | leucine rich repeat containing 16                                                                                                  |
| Hs.116471.1.34 | chr16:63579560:63573706   | 63578978  | c | NM_001797 | 7  | CDS  | 1009   | CDH11     | cadherin 11, type 2, OB-cadherin (osteoblast)                                                                                      |
| Hs.116471.1.38 | chr16:63583171:63579749   | 63582747  | c | NM_001797 | 6  | CDS  | 1009   | CDH11     | cadherin 11, type 2, OB-cadherin (osteoblast)                                                                                      |
| Hs.116651.1.10 | chr11:117633162:117631159 | 117632836 | c | NM_005797 | 5  | 3UTR | 10205  | EVA1      | epithelial V-like antigen 1                                                                                                        |
| Hs.116651.1.11 | chr11:117633162:117631159 | 117632916 | c | NM_005797 | 5  | 3UTR | 10205  | EVA1      | epithelial V-like antigen 1                                                                                                        |
| Hs.116796.1.13 | chr11:111361256:111362804 | 111361447 | c | NM_033425 | 4  | CDS  | 85458  | DIXDC1    | DIX domain containing 1                                                                                                            |
| Hs.116796.1.15 | chr11:111364990:111368348 | 111365041 | c | NM_033425 | 6  | CDS  | 85458  | DIXDC1    | DIX domain containing 1                                                                                                            |
| Hs.116796.1.9  | chr11:111350918:111356671 | 111351929 | c | BC064479  | 5  | CDS  | 85458  | DIXDC1    | DIX domain containing 1                                                                                                            |
| Hs.117060.1.14 | chr9:92359523:92357041    | 92358549  | c | NM_001393 | 3  | CDS  | 1842   | ECM2      | extracellular matrix protein 2, female organ and adipocyte specific                                                                |
| Hs.117167.1.8  | chr13:28173637:28173094   | 28173540  | c | BC060850  | 7  | CDS  | 283537 | LOC283537 | hypothetical protein LOC283537                                                                                                     |
| Hs.117747.1.5  | chr4:146924914:146929818  | 146925387 | c | NM_172250 | 3  | CDS  | 166785 | MMAA      | methylmalonic aciduria (cobalamin deficiency) cblA type                                                                            |
| Hs.117767.1.19 | chr8:105056911:105070708  | 105057660 | c | NM_014677 | 13 | CDS  | 9699   | RIMS2     | regulating synaptic membrane exocytosis 2                                                                                          |
| Hs.118166.1.12 | chr12:31496140:31491971   | 31495903  | c | BC068580  | 6  | CDS  | 160518 | MGC24039  | hypothetical protein MGC24039                                                                                                      |
| Hs.118166.1.8  | chr12:31477355:31470626   | 31476578  | c | NM_144973 | 8  | CDS  | 160518 | MGC24039  | hypothetical protein MGC24039                                                                                                      |
| Hs.118351.1.21 | chr7:156509142:156512858  | 156509402 | c | NM_014671 | 14 | CDS  | 9690   | UBE3C     | ubiquitin protein ligase E3C                                                                                                       |
| Hs.118354.1.1  | chr6:30633969:30637589    | 30634084  | c | NM_025263 | 2  | CDS  | 80742  | PRR3      | proline rich 3                                                                                                                     |
| Hs.118666.1.11 | chr1:151774399:151775707  | 151774557 | c | BC014012  | 1  | CDS  | 80308  | FLAD1     | Fad1, flavin adenine dinucleotide synthetase, homolog (yeast)<br>v-erb-b2 erythroblastic leukemia viral oncogene homolog 3 (avian) |
| Hs.118681.1.6  | chr12:54765233:54766581   | 54765674  | c | NM_001982 | 3  | CDS  | 2065   | ERBB3     |                                                                                                                                    |
| Hs.118738.1.40 | chr3:51492774:51480062    | 51492725  | c | NM_014703 | 3  | CDS  | 9730   | VprBP     | Vpr-binding protein                                                                                                                |
| Hs.118738.1.6  | chr3:51411205:51409596    | 51410897  | c | NM_014703 | 24 | 3UTR | 9730   | VprBP     | Vpr-binding protein                                                                                                                |
| Hs.119014.1.4  | chr19:56768467:56776455   | 56769275  | c | NM_007147 | 2  | CDS  | 7728   | ZNF175    | zinc finger protein 175                                                                                                            |
| Hs.11916.1.19  | chr2:28024774:27993090    | 28024344  | c | NM_022128 | 1  | CDS  | 64080  | RBKS      | ribokinase                                                                                                                         |
| Hs.119286.1.4  | chr20:56479070:56476121   | 56478704  | c | NM_153360 | 2  | CDS  | 164284 | FLJ90166  | hypothetical protein FLJ90166                                                                                                      |
| Hs.119598.1.45 | chr22:38037965:38037347   | 38037965  | c | NM_000967 | 3  | CDS  | 6122   | RPL3      | ribosomal protein L3                                                                                                               |
| Hs.119684.1.4  | chr8:23016640:23025177    | 23017006  | c | NM_003841 | 1  | CDS  | 8794   | TNFRSF10C | tumor necrosis factor receptor superfamily, member 10c,<br>decoy without an intracellular domain                                   |
| Hs.120633.1.8  | chr11:94557231:94551641   | 94556947  | c | NM_144665 | 6  | CDS  | 143686 | SESN3     | sestrin 3                                                                                                                          |

|                |                           |           |   |              |    |      |        |              |                                                                         |
|----------------|---------------------------|-----------|---|--------------|----|------|--------|--------------|-------------------------------------------------------------------------|
| Hs.120658.1.16 | chr5:38922050:38939740    | 38922516  | c | NM_003999    | 7  | CDS  | 9180   | OSMR         | oncostatin M receptor                                                   |
| Hs.120658.1.27 | chr5:38968395:38968730    | 38968403  | c | NM_003999    | 17 | CDS  | 9180   | OSMR         | oncostatin M receptor                                                   |
| Hs.120766.1.3  | chr4:142501251:142503245  | 142501339 | c | NM_014487    | 2  | CDS  | 27309  | ZNF330       | zinc finger protein 330                                                 |
| Hs.120949.1.26 | chr7:79948115:79950350    | 79948273  | c | NM_001001548 | 14 | CDS  | 948    | CD36         | CD36 antigen (collagen type I receptor, thrombospondin receptor)        |
| Hs.120949.1.27 | chr7:79948115:79950350    | 79948376  | c | NM_001001548 | 14 | CDS  | 948    | CD36         | CD36 antigen (collagen type I receptor, thrombospondin receptor)        |
| Hs.121333.1.1  | chr3:39484236:39496534    | 39484236  | c | NM_182935    | 1  | 5UTR | 4336   | MOBP         | myelin-associated oligodendrocyte basic protein                         |
| Hs.121347.1.6  | chr10:118414261:118413675 | 118413787 | c | NM_144661    | 4  | CDS  | 143379 | C10orf82     | chromosome 10 open reading frame 82                                     |
| Hs.121347.1.7  | chr10:118414261:118413675 | 118413885 | c | NM_144661    | 4  | CDS  | 143379 | C10orf82     | chromosome 10 open reading frame 82                                     |
| Hs.121494.1.7  | chr7:123193930:123204202  | 123194051 | c | NM_003117    | 5  | CDS  | 6677   | SPAM1        | sperm adhesion molecule 1 (PH-20 hyaluronidase, zona pellucida binding) |
| Hs.122006.1.7  | chr15:47504073:47562639   | 47505004  | c | NM_002009    | 2  | CDS  | 2252   | FGF7         | fibroblast growth factor 7 (keratinocyte growth factor)                 |
| Hs.122115.1.15 | chr12:131259458:131265232 | 131259592 | c | AK126212     | 4  | CDS  | 347918 | FLJ33915     | hypothetical protein FLJ33915                                           |
| Hs.122115.1.16 | chr12:131259458:131265232 | 131259674 | c | AK126212     | 4  | CDS  | 347918 | FLJ33915     | hypothetical protein FLJ33915                                           |
| Hs.122927.1.22 | chr2:29308963:29316088    | 29309230  | c | NM_024692    | 15 | CDS  | 79745  | RSNL2        | restin-like 2                                                           |
| Hs.122934.1.10 | chr2:210734168:210730758  | 210733663 | c | NM_152519    | 7  | CDS  | 151050 | FLJ23861     | hypothetical protein FLJ23861                                           |
| Hs.122934.1.15 | chr2:210794333:210788438  | 210794250 | c | NM_152519    | 4  | CDS  | 151050 | FLJ23861     | hypothetical protein FLJ23861                                           |
| Hs.122934.1.9  | chr2:210730649:210721777  | 210730553 | c | NM_152519    | 8  | CDS  | 151050 | FLJ23861     | hypothetical protein FLJ23861                                           |
| Hs.122939.1.6  | chr16:20338259:20340080   | 20338598  | c | NM_017888    | 4  | CDS  | 54988  | FLJ20581     | hypothetical protein FLJ20581                                           |
| Hs.123659.1.19 | chr1:27966736:27969128    | 27967133  | c | NM_014474    | 7  | CDS  | 27293  | SMPDL3B      | sphingomyelin phosphodiesterase, acid-like 3B                           |
| Hs.124147.1.8  | chr1:66705446:66705892    | 66705778  | c | NM_012308    | 3  | CDS  | 22992  | FBXL11       | F-box and leucine-rich repeat protein 11                                |
| Hs.12420.1.22  | chr4:130140986:130146615  | 130142839 | c | NM_199320    | 8  | CDS  | 79960  | PHF17        | PHD finger protein 17                                                   |
| Hs.12420.1.23  | chr4:130140986:130146615  | 130143392 | c | NM_199320    | 8  | CDS  | 79960  | PHF17        | PHD finger protein 17                                                   |
| Hs.124565.1.3  | chr2:219858156:219855650  | 219858096 | c | AK055730     | 5  | 3UTR | 151295 | SLC23A3      | solute carrier family 23 (nucleobase transporters), member 3            |
| Hs.12457.1.25  | chr1:225907105:225906159  | 225906984 | c | NM_018230    | 18 | CDS  | 55746  | NUP133       | nucleoporin 133kDa                                                      |
| Hs.125039.1.7  | chr7:86633298:86635356    | 86634021  | c | NM_021151    | 4  | CDS  | 54677  | CROT         | carnitine O-octanoyltransferase                                         |
| Hs.125113.1.25 | chr21:29367722:29364530   | 29366462  | c | NM_006585    | 1  | CDS  | 10694  | CCT8         | chaperonin containing TCP1, subunit 8 (theta)                           |
| Hs.125300.1.7  | chr11:5618996:5620211     | 5619104   | c | NM_001003819 | 11 | CDS  | 445372 | TRIM6-TRIM34 | tripartite motif-containing 6 and tripartite motif-containing 34        |
| Hs.125474.1.25 | chr11:58099808:58094763   | 58099553  | c | NM_004811    | 1  | CDS  | 9404   | LPXN         | leupaxin                                                                |
| Hs.125605.1.4  | chr4:96494452:96485126    | 96494372  | c | NM_003728    | 10 | CDS  | 8633   | UNC5C        | unc-5 homolog C (C. elegans)                                            |
| Hs.125962.1.7  | chr7:115218266:115208262  | 115217688 | c | NM_012252    | 2  | CDS  | 22797  | TFEC         | transcription factor EC                                                 |
| Hs.126221.1.16 | chr21:44322094:44323872   | 44322272  | c | NM_003274    | 11 | CDS  | 7109   | TMEM1        | transmembrane protein 1                                                 |
| Hs.126221.1.26 | chr21:44328573:44331110   | 44328804  | c | NM_003274    | 15 | CDS  | 7109   | TMEM1        | transmembrane protein 1                                                 |
| Hs.126256.1.16 | chr2:113305099:113304382  | 113304944 | c | NM_000576    | 6  | CDS  | 3553   | IL1B         | interleukin 1, beta                                                     |
| Hs.126494.1.5  | chr17:25444081:25458977   | 25444146  | c | NM_198529    | 17 | CDS  | 374786 | FLJ46247     | FLJ46247 protein                                                        |
| Hs.126550.1.23 | chr18:59225644:59222040   | 59225589  | c | NM_004869    | 4  | CDS  | 9525   | VPS4B        | vacuolar protein sorting 4B (yeast)                                     |
| Hs.126838.1.3  | chr4:176227056:176271226  | 176227276 | c | NM_014269    | 1  | 5UTR | 11086  | ADAM29       | a disintegrin and metalloproteinase domain 29                           |
| Hs.126888.1.13 | chr18:2556819:2553859     | 2556693   | c | NM_022840    | 2  | CDS  | 64863  | METTL4       | methyltransferase like 4                                                |
| Hs.126906.1.28 | chr5:71690407:71691186    | 71690539  | c | NM_024754    | 10 | 3UTR | 79810  | PTCD2        | pentatricopeptide repeat domain 2                                       |
| Hs.126906.1.30 | chr5:71690407:71691186    | 71690812  | c | NM_024754    | 10 | 3UTR | 79810  | PTCD2        | pentatricopeptide repeat domain 2                                       |
| Hs.126906.1.31 | chr5:71690407:71691186    | 71690878  | c | NM_024754    | 10 | 3UTR | 79810  | PTCD2        | pentatricopeptide repeat domain 2                                       |
| Hs.127011.1.10 | chr6:54299674:54315982    | 54299760  | c | NM_014464    | 4  | CDS  | 27283  | TINAG        | tubulointerstitial nephritis antigen                                    |
| Hs.127011.1.4  | chr6:54293400:54294053    | 54293427  | c | NM_014464    | 2  | CDS  | 27283  | TINAG        | tubulointerstitial nephritis antigen                                    |
| Hs.127011.1.7  | chr6:54294144:54299558    | 54294149  | c | NM_014464    | 3  | CDS  | 27283  | TINAG        | tubulointerstitial nephritis antigen                                    |
| Hs.12707.1.3   | chr3:133668856:133674686  | 133668888 | c | NM_173823    | 4  | CDS  | 23317  | DNAJC13      | DnaJ (Hsp40) homolog, subfamily C, member 13                            |
| Hs.127405.1.2  | chr11:31283737:31268976   | 31283654  | c | NM_181807    | 6  | CDS  | 341019 | DCDC1        | doublecortin domain containing 1                                        |

|                |                           |           |   |              |    |      |        |           |                                                                           |
|----------------|---------------------------|-----------|---|--------------|----|------|--------|-----------|---------------------------------------------------------------------------|
| Hs.127519.1.1  | chr2:202142168:202144974  | 202142646 | c | NM_018571    | 1  | 5UTR | 55437  | ALS2CR2   | amyotrophic lateral sclerosis 2 (juvenile) chromosome region, candidate 2 |
| Hs.127657.1.18 | chr3:158660671:158628980  | 158660440 | c | NM_024621    | 4  | CDS  | 79674  | VEPH1     | ventricular zone expressed PH domain homolog 1 (zebrafish)                |
| Hs.127735.1.10 | chr7:94802267:94810399    | 94802764  | c | NM_016116    | 3  | CDS  | 51666  | ASB4      | ankyrin repeat and SOCS box-containing 4                                  |
| Hs.127736.1.12 | chr1:33907262:33878301    | 33906802  | c | NM_052896    | 13 | CDS  | 114784 | CSMD2     | CUB and Sushi multiple domains 2                                          |
| Hs.127799.1.4  | chr11:101697842:101700401 | 101698124 | c | NM_182962    | 2  | 5UTR | 330    | BIRC3     | baculoviral IAP repeat-containing 3                                       |
| Hs.127930.1.4  | chr8:39587383:39606049    | 39587530  | c | NM_014237    | 6  | CDS  | 8749   | ADAM18    | a disintegrin and metalloproteinase domain 18                             |
| Hs.127930.1.6  | chr8:39587383:39606049    | 39587914  | c | NM_014237    | 6  | CDS  | 8749   | ADAM18    | a disintegrin and metalloproteinase domain 18                             |
| Hs.128067.1.9  | chr2:175252785:175252361  | 175252418 | c | BX640870     | 9  | CDS  | 7456   | WASPIP    | Wiskott-Aldrich syndrome protein interacting protein                      |
| Hs.128130.1.13 | chr8:613288:608793        | 612724    | c | NM_207332    | 4  | CDS  | 157697 | LOC157697 | hypothetical protein LOC157697                                            |
| Hs.128130.1.8  | chr8:608597:604677        | 605992    | c | NM_207332    | 5  | CDS  | 157697 | LOC157697 | hypothetical protein LOC157697                                            |
| Hs.128258.1.16 | chr13:42831986:42828289   | 42831868  | c | NM_017993    | 6  | CDS  | 55068  | FLJ10094  | hypothetical protein FLJ10094                                             |
| Hs.128474.1.6  | chr9:39108099:39099285    | 39107921  | c | NM_033655    | 14 | CDS  | 79937  | CNTNAP3   | contactin associated protein-like 3                                       |
| Hs.128548.1.15 | chr4:9755645:9755342      | 9755645   | c | NM_005112    | 10 | CDS  | 9948   | WDR1      | WD repeat domain 1                                                        |
| Hs.128696.1.15 | chr5:54996277:54988360    | 54996145  | c | NM_173514    | 8  | CDS  | 153129 | FLJ90709  | hypothetical protein FLJ90709                                             |
| Hs.128791.1.25 | chr20:5875051:5873561     | 5874411   | c | NM_015939    | 2  | CDS  | 51605  | CGI-09    | CGI-09 protein                                                            |
| Hs.128823.1.3  | chr5:177317270:177317414  | 177317357 | c | AK126616     | 4  | 3UTR | NA     | NA        | NA                                                                        |
| Hs.128824.1.14 | chrX:67195781:67122196    | 67195605  | c | NM_002547    | 15 | CDS  | 4983   | OPHN1     | oligophrenin 1                                                            |
| Hs.128824.1.17 | chrX:67213015:67209537    | 67210900  | c | NM_002547    | 9  | CDS  | 4983   | OPHN1     | oligophrenin 1                                                            |
| Hs.128846.1.14 | chr20:1851292:1853409     | 1851423   | c | NM_080792    | 5  | CDS  | 140885 | PTPNS1    | protein tyrosine phosphatase, non-receptor type substrate 1               |
| Hs.129550.1.11 | chr3:52746641:52720926    | 52746554  | c | NM_003157    | 15 | CDS  | 6787   | NEK4      | NIMA (never in mitosis gene a)-related kinase 4                           |
| Hs.12967.1.34  | chr6:152564801:152562918  | 152564756 | c | NM_015293    | 50 | CDS  | 23345  | SYNE1     | spectrin repeat containing, nuclear envelope 1                            |
| Hs.12967.1.74  | chr6:152706836:152697422  | 152706466 | c | NM_015293    | 10 | CDS  | 23345  | SYNE1     | spectrin repeat containing, nuclear envelope 1                            |
| Hs.12967.1.82  | chr6:152750089:152747523  | 152748527 | c | NM_033071    | 75 | CDS  | 23345  | SYNE1     | spectrin repeat containing, nuclear envelope 1                            |
| Hs.12967.1.87  | chr6:152780466:152778269  | 152780249 | c | NM_033071    | 62 | CDS  | 23345  | SYNE1     | spectrin repeat containing, nuclear envelope 1                            |
| Hs.129673.1.19 | chr17:7420735:7421097     | 7420998   | c | NM_001416    | 5  | CDS  | 1973   | EIF4A1    | eukaryotic translation initiation factor 4A, isoform 1                    |
| Hs.130031.1.34 | chr5:14450264:14451988    | 14450450  | c | NM_007118    | 29 | CDS  | 7204   | TRIO      | triple functional domain (PTPRF interacting)                              |
| Hs.130031.1.37 | chr5:14452180:14454071    | 14452507  | c | NM_007118    | 30 | CDS  | 7204   | TRIO      | triple functional domain (PTPRF interacting)                              |
| Hs.130054.1.7  | chr1:170359886:170347810  | 170359534 | c | NM_198493    | 2  | CDS  | 339416 | ANKRD45   | ankyrin repeat domain 45                                                  |
| Hs.13014.1.28  | chr22:41542773:41538362   | 41542718  | c | NM_014570    | 9  | CDS  | 26286  | ARFGAP3   | ADP-ribosylation factor GTPase activating protein 3                       |
| Hs.130306.1.7  | chr18:61681134:61698616   | 61682341  | c | NM_004361    | 11 | CDS  | 1005   | CDH7      | cadherin 7, type 2                                                        |
| Hs.130413.1.22 | chr13:98997360:98999419   | 98997704  | c | NM_004800    | 11 | CDS  | 9375   | TM9SF2    | transmembrane 9 superfamily member 2                                      |
| Hs.130535.1.11 | chr4_random:915541:900450 | 915418    | c | NM_001004347 | 3  | 3UTR | 441058 | MGC39584  | hypothetical gene supported by BC029568                                   |
| Hs.130690.1.9  | chr13:99315167:99316494   | 99315487  | c | NM_138280    | 5  | CDS  | 171425 | CLYBL     | citrate lyase beta like                                                   |
| Hs.130746.1.4  | chr1:166119908:166098285  | 166119682 | c | NM_021179    | 4  | CDS  | 57821  | C1orf114  | chromosome 1 open reading frame 114                                       |
| Hs.130759.1.26 | chr3:147729098:147726133  | 147728429 | c | NM_021105    | 4  | CDS  | 5359   | PLSCR1    | phospholipid scramblase 1                                                 |
| Hs.130849.1.11 | chr16:67924117:67922500   | 67924000  | c | NM_032382    | 4  | CDS  | 84342  | COG8      | component of oligomeric golgi complex 8                                   |
| Hs.130849.1.12 | chr16:67924117:67922500   | 67924042  | c | NM_032382    | 4  | CDS  | 84342  | COG8      | component of oligomeric golgi complex 8                                   |
| Hs.130849.1.24 | chr16:67930579:67928117   | 67930486  | c | NM_032382    | 1  | CDS  | 84342  | COG8      | component of oligomeric golgi complex 8                                   |
| Hs.130853.1.1  | chr6:26266767:26279181    | 26266841  | c | NM_138720    | 1  | 3UTR | 3017   | HIST1H2BD | histone 1, H2bd                                                           |
| Hs.130988.1.23 | chr19:45012854:45012508   | 45012686  | c | NM_004714    | 4  | CDS  | 9149   | DYRK1B    | dual-specificity tyrosine-(Y)-phosphorylation regulated kinase 1B         |
| Hs.131017.1.19 | chr13:23767007:23769500   | 23767224  | c | NM_153023    | 9  | CDS  | 221178 | SPATA13   | spermatogenesis associated 13                                             |
| Hs.131367.1.7  | chr10:26350584:26352956   | 26352416  | c | NM_017433    | 8  | CDS  | 53904  | MYO3A     | myosin IIIA                                                               |
| Hs.131686.1.20 | chr17:64551224:64543538   | 64550651  | c | NM_080283    | 6  | CDS  | 10350  | ABCA9     | ATP-binding cassette, sub-family A (ABC1), member 9                       |
| Hs.131704.1.16 | chr10:33526583:33521353   | 33526557  | c | BX648250     | 12 | CDS  | 8829   | NRP1      | neuropilin 1                                                              |
| Hs.131704.1.42 | chr10:33659641:33599791   | 33659133  | c | NM_001024629 | 3  | CDS  | 8829   | NRP1      | neuropilin 1                                                              |

|                 |                          |           |   |              |    |      |        |          |                                                            |
|-----------------|--------------------------|-----------|---|--------------|----|------|--------|----------|------------------------------------------------------------|
| Hs.131704.1.46  | chr10:33663243:33659817  | 33663099  | c | NM_001024629 | 2  | CDS  | 8829   | NRP1     | neuropilin 1                                               |
| Hs.131715.1.22  | chr13:78794484:78792847  | 78794426  | c | NM_022118    | 20 | CDS  | 64062  | C13orf10 | chromosome 13 open reading frame 10                        |
| Hs.131715.1.46  | chr13:78838190:78837855  | 78837896  | c | NM_022118    | 8  | CDS  | 64062  | C13orf10 | chromosome 13 open reading frame 10                        |
| Hs.131887.1.12  | chr5:34980888:34981622   | 34980898  | c | NM_001012339 | 8  | CDS  | 134218 | DNAJA5   | DnaJ homology subfamily A member 5                         |
| Hs.131887.1.15  | chr5:34985540:34986031   | 34985710  | c | NM_194283    | 10 | CDS  | 134218 | DNAJA5   | DnaJ homology subfamily A member 5                         |
| Hs.131903.1.13  | chr6:169865500:169861515 | 169865382 | c | NM_182552    | 16 | CDS  | 253769 | WDR27    | WD repeat domain 27                                        |
| Hs.131903.1.16  | chr6:169876003:169869737 | 169875372 | c | NM_182552    | 13 | CDS  | 253769 | WDR27    | WD repeat domain 27                                        |
| Hs.131903.1.28  | chr6:169884863:169883285 | 169884645 | c | NM_182552    | 6  | CDS  | 253769 | WDR27    | WD repeat domain 27                                        |
| Hs.132121.1.13  | chr1:66838229:66845233   | 66838904  | c | NM_032291    | 8  | CDS  | 84251  | SGIP1    | SH3-domain GRB2-like (endophilin) interacting protein 1    |
| Hs.132121.1.14  | chr1:66848724:66849647   | 66848948  | c | NM_032291    | 10 | CDS  | 84251  | SGIP1    | SH3-domain GRB2-like (endophilin) interacting protein 1    |
| Hs.132121.1.22  | chr1:66868021:66873137   | 66868232  | c | NM_032291    | 17 | CDS  | 84251  | SGIP1    | SH3-domain GRB2-like (endophilin) interacting protein 1    |
| Hs.132121.1.5   | chr1:66803615:66810773   | 66803809  | c | NM_032291    | 2  | CDS  | 84251  | SGIP1    | SH3-domain GRB2-like (endophilin) interacting protein 1    |
| Hs.132158.1.2   | chr5:150866907:150865852 | 150866427 | c | NM_001447    | 22 | CDS  | 2196   | FAT2     | FAT tumor suppressor homolog 2 (Drosophila)                |
| Hs.132158.1.8   | chr5:150891340:150889147 | 150890872 | c | NM_001447    | 13 | CDS  | 2196   | FAT2     | FAT tumor suppressor homolog 2 (Drosophila)                |
| Hs.132319.1.21  | chr11:61486942:61488151  | 61487642  | c | NM_004183    | 10 | CDS  | 7439   | VMD2     | vitelliform macular dystrophy 2 (Best disease, bestrophin) |
| Hs.132340.1.11  | chr6:3269066:3243452     | 3268575   | c | NM_021945    | 5  | CDS  | 63027  | C6orf85  | chromosome 6 open reading frame 85                         |
| Hs.132599.1.28  | chr9:395074:396929       | 395099    | c | NM_203447    | 26 | CDS  | 81704  | DOCK8    | dedicator of cytokinesis 8                                 |
| Hs.132864.1.28  | chr17:37623694:37623009  | 37623234  | c | NM_012448    | 9  | CDS  | 6777   | STAT5B   | signal transducer and activator of transcription 5B        |
| Hs.132966.1.15  | chr7:116003797:116005502 | 116003885 | c | NM_000245    | 12 | CDS  | 4233   | MET      | met proto-oncogene (hepatocyte growth factor receptor)     |
| Hs.132966.1.16  | chr7:116003797:116005502 | 116003911 | c | NM_000245    | 12 | CDS  | 4233   | MET      | met proto-oncogene (hepatocyte growth factor receptor)     |
| Hs.132966.1.25  | chr7:116017475:116029659 | 116017580 | c | NM_000245    | 19 | CDS  | 4233   | MET      | met proto-oncogene (hepatocyte growth factor receptor)     |
| Hs.133044.1.11  | chr17:76411619:76426316  | 76412015  | c | NM_020761    | 9  | CDS  | 57521  | raptor   | raptor                                                     |
| Hs.133044.1.18  | chr17:76512069:76513764  | 76512554  | c | NM_020761    | 23 | CDS  | 57521  | raptor   | raptor                                                     |
| Hs.133294.1.12  | chr1:153320045:153318113 | 153319700 | c | NM_178229    | 27 | CDS  | 128239 | IQGAP3   | IQ motif containing GTPase activating protein 3            |
| Hs.133321.1.23  | chrX:154317820:154307631 | 154317636 | c | NM_018196    | 3  | CDS  | 55217  | TMLHE    | trimethyllysine hydroxylase, epsilon                       |
| Hs.133350.1.34  | chr12:69024276:69026226  | 69026113  | c | NM_014515    | 14 | CDS  | 4848   | CNOT2    | CCR4-NOT transcription complex, subunit 2                  |
| Hs.13349.1.12   | chr1:201677581:201678465 | 201677927 | c | NM_001005387 | 17 | 3UTR | 23114  | NFASC    | neurofascin                                                |
| Hs.13349.1.20   | chr1:201686900:201688202 | 201687457 | c | NM_001005387 | 23 | 3UTR | 23114  | NFASC    | neurofascin                                                |
| Hs.133892.1.6   | chr15:61123405:61136236  | 61123600  | c | NM_000366    | 2  | CDS  | 7168   | TPM1     | tropomyosin 1 (alpha)                                      |
| Hs.133995.1.21  | chr22:41959341:41952380  | 41958080  | c | NM_173050    | 7  | CDS  | 80274  | SCUBE1   | signal peptide, CUB domain, EGF-like 1                     |
| Hs.134296.1.47  | chr8:13207148:13116655   | 13206487  | c | NM_024767    | 5  | CDS  | 10395  | DLC1     | deleted in liver cancer 1                                  |
| Hs.134514.1.39  | chr19:1010085:1012780    | 1010258   | c | NM_019112    | 39 | CDS  | 10347  | ABCA7    | ATP-binding cassette, sub-family A (ABC1), member 7        |
| Hs.13453.1.6    | chr9:94295908:94298076   | 94296197  | c | NM_032558    | 5  | CDS  | 84641  | HIATL1   | hippocampus abundant transcript-like 1                     |
| Hs.134602.1.272 | chr2:179489719:179485486 | 179488728 | c | NM_003319    | 6  | CDS  | 7273   | TTN      | titin                                                      |
| Hs.13526.1.3    | chr16:67454466:67458482  | 67454561  | c | AB051533     | 3  | CDS  | 79613  | FLJ12688 | hypothetical protein FLJ12688                              |
| Hs.135406.1.26  | chr2:37366337:37362196   | 37365991  | c | NM_005760    | 2  | CDS  | 10153  | CEBPZ    | CCAAT/enhancer binding protein zeta                        |
| Hs.135471.1.4   | chr15:88575169:88574742  | 88574887  | c | NM_006384    | 6  | CDS  | 10519  | CIB1     | calcium and integrin binding 1 (calmyrin)                  |
| Hs.135756.1.17  | chr5:74922022:74929327   | 74922090  | c | AY769932     | 10 | CDS  | 51426  | POLK     | polymerase (DNA directed) kappa                            |
| Hs.135997.1.6   | chr3:197533220:197531413 | 197533014 | c | NM_152773    | 1  | CDS  | 255758 | MGC33212 | hypothetical protein MGC33212                              |
| Hs.136280.1.4   | chr19:1805279:1803595    | 1805225   | c | NM_031918    | 2  | 3UTR | 83855  | KLF16    | Kruppel-like factor 16                                     |
| Hs.136398.1.33  | chr9:86181887:86172962   | 86181412  | c | NM_024617    | 10 | CDS  | 79670  | ZCCHC6   | zinc finger, CCHC domain containing 6                      |
| Hs.136398.1.34  | chr9:86181887:86172962   | 86181803  | c | NM_024617    | 10 | CDS  | 79670  | ZCCHC6   | zinc finger, CCHC domain containing 6                      |
| Hs.136398.1.41  | chr9:86189445:86187633   | 86189343  | c | NM_024617    | 5  | CDS  | 79670  | ZCCHC6   | zinc finger, CCHC domain containing 6                      |

|                |                           |           |   |              |    |      |        |           |                                                                                                                                          |
|----------------|---------------------------|-----------|---|--------------|----|------|--------|-----------|------------------------------------------------------------------------------------------------------------------------------------------|
| Hs.13640.1.36  | chr3:79070440:78878741    | 79070163  | c | NM_002941    | 3  | CDS  | 6091   | ROBO1     | roundabout, axon guidance receptor, homolog 1 (Drosophila)                                                                               |
| Hs.136778.1.16 | chr16:83336781:83349822   | 83337137  | c | NM_005153    | 4  | CDS  | 9100   | USP10     | ubiquitin specific protease 10                                                                                                           |
| Hs.136778.1.17 | chr16:83336781:83349822   | 83337194  | c | NM_005153    | 4  | CDS  | 9100   | USP10     | ubiquitin specific protease 10                                                                                                           |
| Hs.136829.1.11 | chr9:3261002:3260526      | 3260929   | c | NM_002919    | 11 | CDS  | 5991   | RFX3      | regulatory factor X, 3 (influences HLA class II expression)                                                                              |
| Hs.136829.1.5  | chr9:3238031:3218890      | 3237037   | c | NM_134428    | 16 | CDS  | 5991   | RFX3      | regulatory factor X, 3 (influences HLA class II expression)                                                                              |
| Hs.136982.1.3  | chr15:98707035:98703356   | 98706660  | c | NM_207383    | 2  | 3UTR | 388182 | FLJ42289  | FLJ42289 protein                                                                                                                         |
| Hs.136982.1.4  | chr15:98707035:98703356   | 98706714  | c | NM_207383    | 2  | 3UTR | 388182 | FLJ42289  | FLJ42289 protein                                                                                                                         |
| Hs.137183.1.16 | chr11:116879769:116858088 | 116879440 | c | NM_020693    | 11 | CDS  | 57453  | DSCAML1   | Down syndrome cell adhesion molecule like 1                                                                                              |
| Hs.137183.1.20 | chr11:116894390:116892665 | 116894323 | c | NM_020693    | 7  | CDS  | 57453  | DSCAML1   | Down syndrome cell adhesion molecule like 1                                                                                              |
| Hs.137270.1.15 | chr10:23359732:23361795   | 23360130  | c | NM_173081    | 18 | CDS  | 219681 | ARMC3     | armadillo repeat containing 3                                                                                                            |
| Hs.137415.1.10 | chr2:36906080:36912584    | 36906455  | c | NM_053276    | 7  | CDS  | 5212   | VIT       | vitrin                                                                                                                                   |
| Hs.137415.1.6  | chr2:36897841:36905887    | 36898050  | c | NM_053276    | 6  | CDS  | 5212   | VIT       | vitrin                                                                                                                                   |
| Hs.137415.1.7  | chr2:36897841:36905887    | 36898469  | c | NM_053276    | 6  | CDS  | 5212   | VIT       | vitrin                                                                                                                                   |
| Hs.13768.1.13  | chr12:1774725:1773187     | 1774540   | c | NM_001005737 | 36 | 3UTR | 93589  | CACNA2D4  | calcium channel, voltage-dependent, alpha 2/delta subunit 4                                                                              |
| Hs.13885.1.6   | chr5:6430278:6427540      | 6430063   | c | NM_032286    | 2  | CDS  | 84246  | TRG20     | hypothetical protein MGC5309                                                                                                             |
| Hs.139053.1.4  | chrX:106116930:106115134  | 106116517 | c | AK001878     | 7  | CDS  | 55285  | FLJ11016  | hypothetical protein FLJ11016                                                                                                            |
| Hs.139263.1.8  | chrX:48827916:48827101    | 48827768  | c | NM_005183    | 29 | CDS  | 778    | CACNA1F   | calcium channel, voltage-dependent, alpha 1F subunit                                                                                     |
| Hs.13999.1.21  | chr19:16826073:16834162   | 16826196  | c | NM_015260    | 8  | CDS  | 23309  | SIN3B     | SIN3 homolog B, transcription regulator (yeast)                                                                                          |
| Hs.13999.1.23  | chr19:16826073:16834162   | 16826326  | c | NM_015260    | 8  | CDS  | 23309  | SIN3B     | SIN3 homolog B, transcription regulator (yeast)                                                                                          |
| Hs.13999.1.25  | chr19:16826073:16834162   | 16826735  | c | NM_015260    | 8  | CDS  | 23309  | SIN3B     | SIN3 homolog B, transcription regulator (yeast)                                                                                          |
| Hs.142023.1.7  | chr3:112780772:112786859  | 112780993 | c | NM_005816    | 4  | CDS  | 10225  | CD96      | CD96 antigen                                                                                                                             |
| Hs.142023.1.9  | chr3:112808330:112825290  | 112808615 | c | NM_005816    | 8  | CDS  | 10225  | CD96      | CD96 antigen                                                                                                                             |
| Hs.142442.1.10 | chr1:20816542:20814974    | 20816443  | c | NM_016287    | 12 | 3UTR | 50809  | HP1BP3    | heterochromatin protein 1, binding protein 3                                                                                             |
| Hs.142442.1.42 | chr1:20848395:20847805    | 20848060  | c | BC032139     | 4  | CDS  | 50809  | HP1BP3    | heterochromatin protein 1, binding protein 3                                                                                             |
| Hs.143137.1.14 | chr20:25552494:25545218   | 25550561  | c | NM_152667    | 1  | CDS  | 140838 | HDHD4     | haloacid dehalogenase-like hydrolase domain containing 4                                                                                 |
| Hs.143261.1.10 | chr15:40473832:40476289   | 40473871  | c | NM_000070    | 8  | CDS  | 825    | CAPN3     | calpain 3, (p94)                                                                                                                         |
| Hs.143261.1.17 | chr15:40482049:40482283   | 40482109  | c | NM_173088    | 1  | 5UTR | 825    | CAPN3     | calpain 3, (p94)                                                                                                                         |
| Hs.143674.1.11 | chr2:33653363:33656669    | 33653476  | c | NM_170672    | 5  | CDS  | 25780  | RASGRP3   | RAS guanyl releasing protein 3 (calcium and DAG-regulated)<br>glucosidase, alpha; acid (Pompe disease, glycogen storage disease type II) |
| Hs.1437.1.2    | chr17:75690285:75692948   | 75691127  | c | NM_000152    | 1  | 5UTR | 2548   | GAA       | glucosidase, alpha; acid (Pompe disease, glycogen storage disease type II)                                                               |
| Hs.143733.1.13 | chr11:27328454:27319674   | 27326995  | c | NM_030771    | 3  | CDS  | 91057  | NY-REN-41 | NY-REN-41 antigen                                                                                                                        |
| Hs.143929.1.5  | chr12:10169162:10167230   | 10168612  | c | NM_022570    | 3  | CDS  | 64581  | CLEC7A    | C-type lectin domain family 7, member A                                                                                                  |
| Hs.144073.1.6  | chr9:136329054:136327067  | 136328625 | c | NM_181701    | 10 | CDS  | 169714 | QSCN6L1   | quiescin Q6-like 1                                                                                                                       |
| Hs.144114.1.16 | chr4:114736094:114734582  | 114735948 | c | NM_001221    | 17 | CDS  | 817    | CAMK2D    | calcium/calmodulin-dependent protein kinase (CaM kinase) II delta                                                                        |
| Hs.144197.1.10 | chr4:115947065:115954684  | 115947170 | c | NM_003360    | 4  | CDS  | 7368   | UGT8      | UDP glycosyltransferase 8 (UDP-galactose ceramide galactosyltransferase)                                                                 |
| Hs.144309.1.10 | chr4:717579:718719        | 718263    | c | NM_006315    | 4  | CDS  | 10336  | PCGF3     | polycomb group ring finger 3                                                                                                             |
| Hs.144531.1.2  | chr17:72389976:72410231   | 72390204  | c | NM_144677    | 3  | CDS  | 146664 | MGAT5B    | mannosyl (alpha-1,6-)-glycoprotein beta-1,6-N-acetylglucosaminyltransferase, isoenzyme B                                                 |
| Hs.144941.1.29 | chr1:46475254:46464192    | 46474434  | c | AK125827     | 2  | CDS  | 10489  | LRRC41    | leucine rich repeat containing 41                                                                                                        |
| Hs.145209.1.27 | chr15:41100764:41096672   | 41100575  | c | NM_174916    | 27 | CDS  | 197131 | UBR1      | ubiquitin protein ligase E3 component n-recognin 1                                                                                       |
| Hs.145386.1.13 | chr8:87560267:87558670    | 87560105  | c | NM_016033    | 7  | CDS  | 51115  | FAM82B    | family with sequence similarity 82, member B                                                                                             |
| Hs.145402.1.10 | chr9:26980194:26999017    | 26980194  | c | NM_025103    | 8  | CDS  | 80173  | CCDC2     | coiled-coil domain containing 2                                                                                                          |
| Hs.14559.1.18  | chr10:95268696:95269428   | 95268858  | c | NM_018131    | 7  | CDS  | 55165  | C10orf3   | chromosome 10 open reading frame 3                                                                                                       |

|                 |                           |           |   |              |    |      |        |               |                                                                                                |
|-----------------|---------------------------|-----------|---|--------------|----|------|--------|---------------|------------------------------------------------------------------------------------------------|
| Hs.145675.1.10  | chr10:108370175:108368021 | 108369866 | c | NM_001013031 | 20 | CDS  | 114815 | SORCS1        | sortilin-related VPS10 domain containing receptor 1                                            |
| Hs.145932.1.11  | chr11:68271251:68269156   | 68271196  | c | NM_004923    | 3  | CDS  | 9633   | MTL5          | metallothionein-like 5, testis-specific (tesmin)                                               |
| Hs.145932.1.8   | chr11:68262743:68239984   | 68262637  | c | NM_004923    | 6  | CDS  | 9633   | MTL5          | metallothionein-like 5, testis-specific (tesmin)                                               |
| Hs.145932.1.9   | chr11:68269034:68266439   | 68268917  | c | NM_004923    | 4  | CDS  | 9633   | MTL5          | metallothionein-like 5, testis-specific (tesmin)                                               |
| Hs.146007.1.23  | chr2:65213190:65216652    | 65213727  | c | NM_015147    | 4  | CDS  | 23177  | KIAA0582      | KIAA0582                                                                                       |
| Hs.146022.1.7   | chr2:135458975:135462266  | 135459207 | c | NM_138326    | 6  | CDS  | 130013 | ACMSD         | aminocarboxymuconate semialdehyde decarboxylase                                                |
| Hs.146162.1.11  | chr4:147721539:147604754  | 147720422 | c | AK075364     | 3  | CDS  | 84068  | C4orf13       | chromosome 4 open reading frame 13                                                             |
| Hs.146246.1.5   | chr8:27818213:27793203    | 27817805  | c | NM_173833    | 7  | CDS  | 286133 | MGC45780      | hypothetical protein MGC45780                                                                  |
| Hs.146393.1.4   | chr16:55526889:55528099   | 55526970  | c | NM_001010989 | 3  | CDS  | 9709   | HERPUD1       | homocysteine-inducible, endoplasmic reticulum stress-inducible, ubiquitin-like domain member 1 |
| Hs.146393.1.9   | chr16:55531659:55533544   | 55531710  | c | NM_001010989 | 6  | CDS  | 9709   | HERPUD1       | homocysteine-inducible, endoplasmic reticulum stress-inducible, ubiquitin-like domain member 1 |
| Hs.146447.1.88  | chr15:46724094:46692582   | 46720478  | c | NM_000138    | 1  | CDS  | 2200   | FBN1          | fibrillin 1 (Marfan syndrome)                                                                  |
| Hs.146520.1.16  | chr15:38636706:38633619   | 38636497  | c | NM_052849    | 3  | CDS  | 90416  | MGC20481      | hypothetical protein MGC20481                                                                  |
| Hs.146542.1.16  | chr1:71875711:71788851    | 71875500  | c | BX538014     | 4  | CDS  | 257194 | NEGR1         | neuronal growth regulator 1                                                                    |
| Hs.146542.1.17  | chr1:71875711:71788851    | 71875640  | c | BX538014     | 4  | CDS  | 257194 | NEGR1         | neuronal growth regulator 1                                                                    |
| Hs.146551.1.20  | chr4:80157225:80165506    | 80157768  | c | NM_198892    | 14 | CDS  | 55589  | BMP2K         | BMP2 inducible kinase                                                                          |
| Hs.1466.1.18    | chrX:30498770:30501874    | 30498946  | c | NM_000167    | 17 | CDS  | 2710   | GK            | glycerol kinase                                                                                |
| Hs.146806.1.7   | chr7:147865003:147888715  | 147865304 | c | NM_003592    | 2  | CDS  | 8454   | CUL1          | cullin 1                                                                                       |
| Hs.147054.1.9   | chr6:55486804:55472057    | 55484832  | c | NM_019036    | 6  | CDS  | 54511  | HMGCLL1       | 3-hydroxymethyl-3-methylglutaryl-Coenzyme A lyase-like 1                                       |
| Hs.147276.1.2   | chr14:76365260:76367298   | 76365399  | c | NM_194287    | 3  | 5UTR | 145497 | C14orf166B    | chromosome 14 open reading frame 166B                                                          |
| Hs.147305.1.6   | chr3:147658895:147655945  | 147658818 | c | NM_020359    | 4  | CDS  | 57047  | PLSCR2        | phospholipid scramblase 2                                                                      |
| Hs.147434.1.24  | chr1:206341115:206342209  | 206341394 | c | NM_025228    | 14 | CDS  | 80342  | TRAF3IP3      | TRAF3 interacting protein 3                                                                    |
| Hs.147441.1.2   | chr6:73808507:73843765    | 73808631  | c | NM_019842    | 3  | CDS  | 56479  | KCNQ5         | potassium voltage-gated channel, KQT-like subfamily, member 5                                  |
| Hs.147441.1.4   | chr6:73890957:73899864    | 73891094  | c | NM_019842    | 9  | CDS  | 56479  | KCNQ5         | potassium voltage-gated channel, KQT-like subfamily, member 5                                  |
| Hs.147762.1.5   | chr2:219717876:219716387  | 219716775 | c | NM_194302    | 1  | CDS  | 255101 | DKFZp434O0527 | hypothetical protein DKFZp434O0527                                                             |
| Hs.14794.1.8    | chr19:61753787:61756864   | 61754210  | c | NM_020828    | 7  | CDS  | 140612 | ZFP28         | zinc finger protein 28 homolog (mouse)                                                         |
| Hs.14794.1.9    | chr19:61753787:61756864   | 61756316  | c | NM_020828    | 7  | CDS  | 140612 | ZFP28         | zinc finger protein 28 homolog (mouse)                                                         |
| Hs.148078.1.146 | chr1:19281872:19273616    | 19281223  | c | NM_020765    | 1  | CDS  | 23352  | RBAF600       | retinoblastoma-associated factor 600                                                           |
| Hs.14846.1.23   | chr13:29007955:29005120   | 29007955  | c | NM_003045    | 3  | CDS  | 6541   | SLC7A1        | solute carrier family 7 (cationic amino acid transporter, y+ system), member 1                 |
| Hs.148768.1.10  | chr7:102508467:102506268  | 102508367 | c | NM_182634    | 5  | 5UTR | 349152 | FLJ36166      | hypothetical protein FLJ36166                                                                  |
| Hs.148768.1.19  | chr7:102512011:102510026  | 102511775 | c | NM_182634    | 4  | 5UTR | 349152 | FLJ36166      | hypothetical protein FLJ36166                                                                  |
| Hs.148768.1.22  | chr7:102512642:102512037  | 102512061 | c | NM_182634    | 3  | 5UTR | 349152 | FLJ36166      | hypothetical protein FLJ36166                                                                  |
| Hs.148778.1.8   | chr8:107788550:107792025  | 107788985 | c | NM_181354    | 7  | CDS  | 55074  | OXR1          | oxidation resistance 1                                                                         |
| Hs.148909.1.12  | chr3:380067:382632        | 380185    | c | NM_006614    | 14 | CDS  | 10752  | CHL1          | cell adhesion molecule with homology to L1CAM (close homolog of L1)                            |
| Hs.149133.1.4   | chr20:5979424:5973327     | 5978851   | c | NM_152611    | 3  | CDS  | 164312 | C20orf75      | chromosome 20 open reading frame 75                                                            |
| Hs.149185.1.7   | chr18:70327144:70329027   | 70327551  | c | NM_018235    | 5  | CDS  | 55748  | CNDP2         | CNDP dipeptidase 2 (metallopeptidase M20 family)                                               |
| Hs.149360.1.36  | chr1:86564618:86563295    | 86564514  | c | NM_020729    | 2  | CDS  | 57489  | KIAA1229      | KIAA1229 protein                                                                               |
| Hs.149367.1.16  | chr6:97095253:97097490    | 97095437  | c | NM_015323    | 11 | CDS  | 23376  | KIAA0776      | KIAA0776                                                                                       |
| Hs.149367.1.17  | chr6:97095253:97097490    | 97096532  | c | NM_015323    | 11 | CDS  | 23376  | KIAA0776      | KIAA0776                                                                                       |
| Hs.149487.1.8   | chr3:15430531:15427949    | 15430182  | c | NM_152396    | 5  | CDS  | 131965 | MGC24132      | hypothetical protein MGC24132                                                                  |
| Hs.149809.1.7   | chr6:70992355:70983506    | 70992038  | c | NM_001851    | 37 | CDS  | 1297   | COL9A1        | collagen, type IX, alpha 1                                                                     |
| Hs.150444.1.24  | chr12:86990014:86989078   | 86989842  | c | AB002371     | 3  | CDS  | 80184  | Cep290        | centrosome protein cep290                                                                      |
| Hs.150557.1.7   | chr9:70257328:70232476    | 70257178  | c | NM_001206    | 1  | CDS  | 687    | KLF9          | Kruppel-like factor 9                                                                          |



|                |                           |           |   |           |    |      |        |           |                                                                                      |
|----------------|---------------------------|-----------|---|-----------|----|------|--------|-----------|--------------------------------------------------------------------------------------|
| Hs.150693.1.27 | chr3:106754120:106773385  | 106754273 | c | NM_001627 | 14 | CDS  | 214    | ALCAM     | activated leukocyte cell adhesion molecule                                           |
| Hs.150693.1.28 | chr3:106754120:106773385  | 106754380 | c | NM_001627 | 14 | CDS  | 214    | ALCAM     | activated leukocyte cell adhesion molecule                                           |
| Hs.150693.1.29 | chr3:106754120:106773385  | 106754705 | c | NM_001627 | 14 | CDS  | 214    | ALCAM     | activated leukocyte cell adhesion molecule                                           |
| Hs.150693.1.5  | chr3:106726043:106733535  | 106726488 | c | NM_001627 | 3  | CDS  | 214    | ALCAM     | activated leukocyte cell adhesion molecule                                           |
| Hs.150718.1.3  | chr11:133515876:133519345 | 133516058 | c | NM_032801 | 3  | CDS  | 83700  | JAM3      | junctional adhesion molecule 3                                                       |
| Hs.151184.1.1  | chr2:200162863:200166705  | 200162987 | c | NM_153031 | 1  | 3UTR | 150538 | FLJ32063  | hypothetical protein FLJ32063                                                        |
| Hs.151220.1.26 | chr4:170199788:170209807  | 170200142 | c | NM_016081 | 14 | CDS  | 23022  | KIAA0992  | palladin                                                                             |
| Hs.151220.1.6  | chr4:170007805:170186802  | 170008159 | c | NM_016081 | 10 | CDS  | 23022  | KIAA0992  | palladin                                                                             |
| Hs.151411.1.33 | chr13:76538127:76536871   | 76538096  | c | NM_015057 | 73 | CDS  | 23077  | MYCBP2    | MYC binding protein 2                                                                |
| Hs.151411.1.79 | chr13:76593508:76571150   | 76593362  | c | NM_015057 | 56 | CDS  | 23077  | MYCBP2    | MYC binding protein 2                                                                |
| Hs.151411.1.92 | chr13:76622869:76618354   | 76622426  | c | NM_015057 | 48 | CDS  | 23077  | MYCBP2    | MYC binding protein 2                                                                |
| Hs.151710.1.10 | chr5:149243184:149227915  | 149242937 | c | NM_000440 | 17 | CDS  | 5145   | PDE6A     | phosphodiesterase 6A, cGMP-specific, rod, alpha                                      |
| Hs.151761.1.81 | chr17:23990459:23989788   | 23990206  | c | NM_014680 | 11 | CDS  | 9703   | KIAA0100  | KIAA0100 gene product                                                                |
| Hs.152774.1.27 | chr2:202085542:202085102  | 202085429 | c | NM_015049 | 8  | CDS  | 66008  | ALS2CR3   | amyotrophic lateral sclerosis 2 (juvenile) chromosome region, candidate 3            |
| Hs.152944.1.20 | chr11:123500234:123510836 | 123500701 | c | NM_014622 | 10 | CDS  | 4013   | LOH11CR2A | loss of heterozygosity, 11, chromosomal region 2, gene A                             |
| Hs.152944.1.21 | chr11:123500234:123510836 | 123500753 | c | NM_014622 | 10 | CDS  | 4013   | LOH11CR2A | loss of heterozygosity, 11, chromosomal region 2, gene A                             |
| Hs.153458.1.13 | chr7:138418149:138421318  | 138419715 | c | AK125956  | 12 | CDS  | 254048 | FLJ25778  | hypothetical protein FLJ25778                                                        |
| Hs.153485.1.6  | chr17:54704980:54705793   | 54705164  | c | NM_182569 | 9  | CDS  | 284161 | GDPD1     | glycerophosphodiester phosphodiesterase domain containing 1                          |
| Hs.153504.1.24 | chr17:50369587:50371283   | 50369622  | c | NM_005486 | 10 | CDS  | 10040  | TOM1L1    | target of myb1-like 1 (chicken)                                                      |
| Hs.153504.1.25 | chr17:50369587:50371283   | 50369679  | c | NM_005486 | 10 | CDS  | 10040  | TOM1L1    | target of myb1-like 1 (chicken)                                                      |
| Hs.153546.1.31 | chr5:137570134:137565744  | 137569465 | c | NM_004661 | 3  | CDS  | 8697   | CDC23     | CDC23 (cell division cycle 23, yeast, homolog)                                       |
| Hs.153563.1.17 | chr2:160513687:160501939  | 160513538 | c | NM_002349 | 28 | CDS  | 4065   | LY75      | lymphocyte antigen 75                                                                |
| Hs.153629.1.31 | chr19:19154381:19152571   | 19153687  | c | NM_005919 | 4  | 5UTR | 4207   | MEF2B     | MADS box transcription enhancer factor 2, polypeptide B (myocyte enhancer factor 2B) |
| Hs.153629.1.38 | chr19:19154381:19152571   | 19154262  | c | NM_005919 | 4  | 5UTR | 4207   | MEF2B     | MADS box transcription enhancer factor 2, polypeptide B (myocyte enhancer factor 2B) |
| Hs.153934.1.2  | chr20:31658567:31662560   | 31658700  | c | NM_005093 | 3  | CDS  | 9139   | CBFA2T2   | core-binding factor, runt domain, alpha subunit 2; translocated to, 2                |
| Hs.153934.1.25 | chr20:31697256:31698961   | 31697263  | c | BC040344  | 11 | 3UTR | 9139   | CBFA2T2   | core-binding factor, runt domain, alpha subunit 2; translocated to, 2                |
| Hs.153934.1.26 | chr20:31697256:31698961   | 31697352  | c | BC040344  | 11 | 3UTR | 9139   | CBFA2T2   | core-binding factor, runt domain, alpha subunit 2; translocated to, 2                |
| Hs.153952.1.1  | chr6:86216916:86233496    | 86217557  | c | NM_002526 | 1  | CDS  | 4907   | NT5E      | 5'-nucleotidase, ecto (CD73)                                                         |
| Hs.153952.1.8  | chr6:86237863:86251671    | 86238032  | c | NM_002526 | 3  | CDS  | 4907   | NT5E      | 5'-nucleotidase, ecto (CD73)                                                         |
| Hs.1540.1.31   | chr18:236323:216902       | 236068    | c | NM_005131 | 11 | CDS  | 9984   | THOC1     | THO complex 1                                                                        |
| Hs.154163.1.12 | chr21:46894080:46903084   | 46894228  | c | NM_001535 | 6  | CDS  | 3275   | HRMT1L1   | HMT1 hnRNP methyltransferase-like 1 (S. cerevisiae)                                  |
| Hs.154163.1.25 | chr21:46903261:46905172   | 46904477  | c | NM_001535 | 7  | CDS  | 3275   | HRMT1L1   | HMT1 hnRNP methyltransferase-like 1 (S. cerevisiae)                                  |
| Hs.154163.1.28 | chr21:46905303:46906139   | 46905611  | c | NM_001535 | 8  | CDS  | 3275   | HRMT1L1   | HMT1 hnRNP methyltransferase-like 1 (S. cerevisiae)                                  |
| Hs.154163.1.8  | chr21:46888829:46892797   | 46889051  | c | NM_001535 | 4  | CDS  | 3275   | HRMT1L1   | HMT1 hnRNP methyltransferase-like 1 (S. cerevisiae)                                  |
| Hs.154429.1.11 | chr20:60187808:60188619   | 60188269  | c | NM_015558 | 11 | 3UTR | 26039  | SS18L1    | synovial sarcoma translocation gene on chromosome 18-like 1                          |
| Hs.154628.1.16 | chr6:159390875:159385368  | 159390734 | c | NM_031924 | 1  | CDS  | 83861  | RSHL2     | radial spokehead-like 2                                                              |
| Hs.155090.1.28 | chr15:50229372:50227025   | 50228767  | c | NM_006578 | 3  | CDS  | 10681  | GNB5      | guanine nucleotide binding protein (G protein), beta 5                               |
| Hs.155165.1.3  | chr11:64608849:64609162   | 64609051  | c | NM_006782 | 2  | CDS  | 7542   | ZFPL1     | zinc finger protein-like 1                                                           |

|                |                           |           |   |           |    |      |        |           |                                                                                                                                |
|----------------|---------------------------|-----------|---|-----------|----|------|--------|-----------|--------------------------------------------------------------------------------------------------------------------------------|
| Hs.155586.1.10 | chr12:6886871:6889314     | 6887125   | c | NM_201650 | 5  | CDS  | 10233  | B7        | B7 gene                                                                                                                        |
| Hs.155586.1.11 | chr12:6886871:6889314     | 6887158   | c | NM_201650 | 5  | CDS  | 10233  | B7        | B7 gene                                                                                                                        |
| Hs.155742.1.8  | chr9:37418570:37419728    | 37418772  | c | NM_012203 | 5  | CDS  | 9380   | GRHPR     | glyoxylate reductase/hydroxypyruvate reductase                                                                                 |
| Hs.155829.1.43 | chr5:179247708:179239396  | 179247183 | c | NM_015043 | 7  | CDS  | 23061  | KIAA0676  | KIAA0676 protein                                                                                                               |
| Hs.15591.1.4   | chr7:99332021:99332672    | 99332139  | c | NM_006833 | 3  | CDS  | 10980  | COPS6     | COP9 constitutive photomorphogenic homolog subunit 6 (Arabidopsis)                                                             |
| Hs.155912.1.21 | chr14:22591018:22588993   | 22590662  | c | NM_022478 | 8  | CDS  | 64403  | CDH24     | cadherin-like 24                                                                                                               |
| Hs.155919.1.30 | chr6:128367921:128361743  | 128367879 | c | NM_002844 | 15 | CDS  | 5796   | PTPRK     | protein tyrosine phosphatase, receptor type, K                                                                                 |
| Hs.155919.1.51 | chr6:128684876:128605441  | 128684241 | c | NM_002844 | 3  | CDS  | 5796   | PTPRK     | protein tyrosine phosphatase, receptor type, K                                                                                 |
| Hs.155942.1.14 | chr15:29140038:29130078   | 29139732  | c | NM_002420 | 10 | CDS  | 4308   | TRPM1     | transient receptor potential cation channel, subfamily M, member 1                                                             |
| Hs.155942.1.21 | chr15:29149525:29147588   | 29148885  | c | NM_002420 | 3  | CDS  | 4308   | TRPM1     | transient receptor potential cation channel, subfamily M, member 1                                                             |
| Hs.155942.1.27 | chr15:29149525:29147588   | 29149514  | c | NM_002420 | 3  | CDS  | 4308   | TRPM1     | transient receptor potential cation channel, subfamily M, member 1                                                             |
| Hs.155959.1.6  | chr7:3764794:3771803      | 3764982   | c | NM_152744 | 7  | CDS  | 221935 | SDK1      | sidekick homolog 1 (chicken)                                                                                                   |
| Hs.156178.1.13 | chr8:98047451:98110806    | 98047466  | c | NM_016134 | 5  | CDS  | 10404  | PGCP      | plasma glutamate carboxypeptidase                                                                                              |
| Hs.156231.1.16 | chr16:86002622:86001443   | 86002522  | c | NM_015144 | 12 | CDS  | 23174  | ZCCHC14   | zinc finger, CCHC domain containing 14                                                                                         |
| Hs.156231.1.5  | chr16:85998784:85998122   | 85998456  | c | NM_015144 | 13 | 3UTR | 23174  | ZCCHC14   | zinc finger, CCHC domain containing 14                                                                                         |
| Hs.156506.1.12 | chr5:133775205:133774673  | 133774948 | c | BC018086  | 1  | CDS  | 91368  | MGC13017  | similar to RIKEN cDNA A430101B06 gene                                                                                          |
| Hs.156540.1.12 | chr15:30771257:30776006   | 30771797  | c | NM_003020 | 5  | CDS  | 6447   | SGNE1     | secretory granule, neuroendocrine protein 1 (7B2 protein)                                                                      |
| Hs.156667.1.39 | chr12:52402075:52401667   | 52401904  | c | NM_020898 | 5  | CDS  | 57658  | CALCOCO1  | calcium binding and coiled-coil domain 1                                                                                       |
| Hs.156727.1.10 | chr5:14765982:14764420    | 14765806  | c | NM_054027 | 11 | CDS  | 56172  | ANKH      | ankylosis, progressive homolog (mouse)                                                                                         |
| Hs.156967.1.38 | chr5:115850343:115846171  | 115850252 | c | NM_020796 | 10 | CDS  | 57556  | SEMA6A    | sema domain, transmembrane domain (TM), and cytoplasmic domain, (semaphorin) 6A                                                |
| Hs.157002.1.15 | chr13:95034990:95032569   | 95034833  | c | NM_014934 | 21 | CDS  | 22873  | DZIP1     | DAZ interacting protein 1                                                                                                      |
| Hs.157002.1.38 | chr13:95080243:95075185   | 95080138  | c | NM_014934 | 7  | CDS  | 22873  | DZIP1     | DAZ interacting protein 1                                                                                                      |
| Hs.157031.1.25 | chr18:57931346:57928187   | 57930925  | c | NM_012327 | 15 | CDS  | 23556  | PIGN      | phosphatidylinositol glycan, class N                                                                                           |
| Hs.157031.1.32 | chr18:57972757:57966552   | 57972575  | c | NM_012327 | 6  | CDS  | 23556  | PIGN      | phosphatidylinositol glycan, class N                                                                                           |
| Hs.157078.1.17 | chr1:209568865:209567192  | 209568280 | c | NM_144567 | 4  | CDS  | 90806  | ANGEL2    | angel homolog 2 (Drosophila)                                                                                                   |
| Hs.157106.1.10 | chr9:6883233:6970924      | 6883267   | c | NM_015061 | 8  | CDS  | 23081  | JMJD2C    | jumonji domain containing 2C                                                                                                   |
| Hs.157106.1.21 | chr9:7004002:7005852      | 7004337   | c | NM_015061 | 14 | CDS  | 23081  | JMJD2C    | jumonji domain containing 2C                                                                                                   |
| Hs.157106.1.23 | chr9:7004002:7005852      | 7004407   | c | NM_015061 | 14 | CDS  | 23081  | JMJD2C    | jumonji domain containing 2C                                                                                                   |
| Hs.157106.1.6  | chr9:6804746:6839506      | 6805149   | c | NM_015061 | 4  | CDS  | 23081  | JMJD2C    | jumonji domain containing 2C                                                                                                   |
| Hs.157284.1.6  | chr8:51784092:51867783    | 51784296  | c | AJ003030  | 16 | CDS  | 54212  | SNTG1     | syntrophin, gamma 1                                                                                                            |
| Hs.158195.1.12 | chr6:122783067:122784993  | 122783252 | c | NM_004506 | 7  | CDS  | 3298   | HSF2      | heat shock transcription factor 2                                                                                              |
| Hs.158497.1.25 | chr1:44093655:44095013    | 44094250  | c | NM_014652 | 11 | CDS  | 9670   | IPO13     | importin 13                                                                                                                    |
| Hs.158992.1.2  | chr10:8134368:8133548     | 8134212   | c | NM_207423 | 1  | 5UTR | 399717 | FLJ45983  | FLJ45983 protein                                                                                                               |
| Hs.159014.1.47 | chr6:4006381:4006887      | 4006830   | c | NM_176800 | 15 | 3UTR | 8899   | PRPF4B    | PRP4 pre-mRNA processing factor 4 homolog B (yeast)                                                                            |
| Hs.159066.1.23 | chr10:115912385:115907430 | 115911357 | c | NM_018017 | 2  | CDS  | 55088  | C10orf118 | chromosome 10 open reading frame 118                                                                                           |
| Hs.159195.1.24 | chr10:128816019:128936261 | 128816211 | c | NM_001380 | 27 | CDS  | 1793   | DOCK1     | dedicator of cytokinesis 1                                                                                                     |
| Hs.159195.1.26 | chr10:128816019:128936261 | 128816350 | c | NM_001380 | 27 | CDS  | 1793   | DOCK1     | dedicator of cytokinesis 1                                                                                                     |
| Hs.159195.1.42 | chr10:129103493:129106618 | 129103848 | c | NM_001380 | 44 | CDS  | 1793   | DOCK1     | dedicator of cytokinesis 1                                                                                                     |
| Hs.159281.1.2  | chrY:24530368:24529949    | 24530065  | c | NM_004680 | 1  | CDS  | 9085   | CDY1      | chromodomain protein, Y-linked, 1                                                                                              |
| Hs.159291.1.5  | chrX:100312218:100313738  | 100312954 | c | NM_001939 | 16 | CDS  | 1821   | DRP2      | dystrophin related protein 2                                                                                                   |
| Hs.159430.1.17 | chr3:173511374:173529443  | 173511424 | c | NM_022763 | 10 | CDS  | 64778  | FNDC3B    | fibronectin type III domain containing 3B                                                                                      |
| Hs.159481.1.13 | chr12:56310201:56309197   | 56309379  | c | NM_001478 | 6  | CDS  | 2583   | GALGT     | UDP-N-acetyl-alpha-D-galactosamine:(N-acetylneuraminy)-galactosylglucosylceramide N-acetylgalactosaminyltransferase (GalNAc-T) |
| Hs.159492.1.5  | chr13:22825923:22813830   | 22825878  | c | NM_014363 | 5  | CDS  | 26278  | SACS      | spastic ataxia of Charlevoix-Saguenay (sacsin)                                                                                 |
| Hs.159494.1.17 | chrX:100417916:100417402  | 100417644 | c | NM_000061 | 14 | CDS  | 695    | BTK       | Bruton agammaglobulinemia tyrosine kinase                                                                                      |

|                |                           |           |   |              |    |      |        |           |                                                                              |
|----------------|---------------------------|-----------|---|--------------|----|------|--------|-----------|------------------------------------------------------------------------------|
| Hs.159546.1.2  | chrX:152512469:152515533  | 152512687 | c | NM_000033    | 1  | CDS  | 215    | ABCD1     | ATP-binding cassette, sub-family D (ALD), member 1                           |
| Hs.159918.1.13 | chr7:10826774:10835734    | 10826926  | c | NM_001007157 | 5  | CDS  | 9678   | PHF14     | PHD finger protein 14                                                        |
| Hs.160063.1.5  | chr2:65893569:66037976    | 65893688  | c | NM_001004345 | 6  | 3UTR | 440867 | FLJ16124  | FLJ16124 protein                                                             |
| Hs.160550.1.14 | chr17:1435956:1433381     | 1435293   | c | NM_152346    | 10 | CDS  | 124935 | SLC43A2   | solute carrier family 43, member 2                                           |
| Hs.160556.1.32 | chr17:32592807:32586816   | 32592627  | c | NM_000664    | 43 | 3UTR | 31     | ACACA     | acetyl-Coenzyme A carboxylase alpha                                          |
| Hs.160871.1.14 | chr12:15631253:15633655   | 15631377  | c | NM_002848    | 23 | CDS  | 5800   | PTPRO     | protein tyrosine phosphatase, receptor type, O                               |
| Hs.160871.1.5  | chr12:15561158:15564401   | 15561264  | c | NM_002848    | 9  | CDS  | 5800   | PTPRO     | protein tyrosine phosphatase, receptor type, O                               |
| Hs.160976.1.19 | chr16:20704982:20709409   | 20705137  | c | NM_005622    | 9  | CDS  | 6296   | SAH       | SA hypertension-associated homolog (rat)                                     |
| Hs.161640.1.19 | chr16:70167325:70165011   | 70166827  | c | NM_000353    | 3  | CDS  | 6898   | TAT       | tyrosine aminotransferase                                                    |
| Hs.16165.1.17  | chr17:73628328:73627069   | 73627829  | c | NM_007267    | 13 | CDS  | 11322  | EVER1     | epidermodysplasia verruciformis 1                                            |
| Hs.161840.1.5  | chr1:243457037:243435171  | 243457007 | c | NM_020394    | 6  | 3UTR | 57116  | ZNF695    | zinc finger protein 695                                                      |
| Hs.161851.1.8  | chr20:61535605:61533167   | 61535478  | c | NM_172106    | 8  | CDS  | 3785   | KCNQ2     | potassium voltage-gated channel, KQT-like subfamily, member 2                |
| Hs.161985.1.10 | chr11:117483801:117484780 | 117484148 | c | NM_019894    | 6  | CDS  | 56649  | TMPRSS4   | transmembrane protease, serine 4                                             |
| Hs.162016.1.19 | chr20:45721847:45721604   | 45721807  | c | NM_018837    | 19 | CDS  | 55959  | SULF2     | sulfatase 2                                                                  |
| Hs.162016.1.33 | chr20:45726280:45725774   | 45726195  | c | NM_018837    | 15 | CDS  | 55959  | SULF2     | sulfatase 2                                                                  |
| Hs.162032.1.28 | chr7:106430548:106434555  | 106430592 | c | NM_012257    | 9  | CDS  | 26959  | HBP1      | HMG-box transcription factor 1                                               |
| Hs.162032.1.29 | chr7:106430548:106434555  | 106430648 | c | NM_012257    | 9  | CDS  | 26959  | HBP1      | HMG-box transcription factor 1                                               |
| Hs.162032.1.31 | chr7:106430548:106434555  | 106431518 | c | NM_012257    | 9  | CDS  | 26959  | HBP1      | HMG-box transcription factor 1                                               |
| Hs.162032.1.33 | chr7:106434698:106435809  | 106434727 | c | NM_012257    | 10 | CDS  | 26959  | HBP1      | HMG-box transcription factor 1                                               |
| Hs.162121.1.14 | chr1:157074197:157073550  | 157074083 | c | NM_004371    | 33 | CDS  | 1314   | COPA      | coatamer protein complex, subunit alpha                                      |
| Hs.162121.1.66 | chr1:157116465:157115421  | 157116289 | c | NM_004371    | 7  | CDS  | 1314   | COPA      | coatamer protein complex, subunit alpha                                      |
| Hs.162121.1.72 | chr1:157122771:157118186  | 157122569 | c | NM_004371    | 5  | CDS  | 1314   | COPA      | coatamer protein complex, subunit alpha                                      |
| Hs.162125.1.9  | chr9:3846008:3819493      | 3845439   | c | NM_152629    | 8  | CDS  | 169792 | GLIS3     | GLIS family zinc finger 3                                                    |
| Hs.162397.1.23 | chr8:28707242:28701326    | 28707153  | c | NM_018250    | 10 | CDS  | 55756  | RC74      | related to CPSF subunits 74 kDa                                              |
| Hs.162646.1.12 | chr3:12422581:12450396    | 12422670  | c | AJ698135     | 5  | CDS  | 5468   | PPARG     | peroxisome proliferative activated receptor, gamma                           |
| Hs.162659.1.6  | chr9:126237531:126263686  | 126239466 | c | NM_033446    | 6  | CDS  | 89853  | C9orf28   | chromosome 9 open reading frame 28                                           |
| Hs.162777.1.21 | chr14:49216192:49210896   | 49216089  | c | NM_002692    | 3  | CDS  | 5427   | POLE2     | polymerase (DNA directed), epsilon 2 (p59 subunit)                           |
| Hs.162795.1.5  | chr16:80662234:80682007   | 80662408  | c | NM_002153    | 3  | CDS  | 3294   | HSD17B2   | hydroxysteroid (17-beta) dehydrogenase 2                                     |
| Hs.162889.1.12 | chr14:80062965:80041117   | 80062810  | c | NM_152446    | 22 | CDS  | 145508 | C14orf145 | chromosome 14 open reading frame 145                                         |
| Hs.162889.1.13 | chr14:80279171:80116521   | 80278852  | c | NM_152446    | 18 | CDS  | 145508 | C14orf145 | chromosome 14 open reading frame 145                                         |
| Hs.16291.1.18  | chr11:117581806:117579591 | 117581550 | c | NM_153206    | 4  | CDS  | 120425 | AMICA1    | adhesion molecule, interacts with CXADR antigen 1                            |
| Hs.162963.1.12 | chr4:81255953:81185801    | 81255840  | c | NM_058172    | 16 | CDS  | 118429 | ANTXR2    | anthrax toxin receptor 2                                                     |
| Hs.162963.1.7  | chr4:81185737:81184506    | 81185495  | c | AK055636     | 17 | 3UTR | 118429 | ANTXR2    | anthrax toxin receptor 2                                                     |
| Hs.162989.1.13 | chr15:43601453:43590775   | 43601100  | c | NM_013309    | 2  | CDS  | 7782   | SLC30A4   | solute carrier family 30 (zinc transporter), member 4                        |
| Hs.162989.1.14 | chr15:43601453:43590775   | 43601260  | c | NM_013309    | 2  | CDS  | 7782   | SLC30A4   | solute carrier family 30 (zinc transporter), member 4                        |
| Hs.163070.1.4  | chr9:27282398:27281062    | 27282140  | c | NM_020641    | 4  | CDS  | 54586  | C9orf11   | chromosome 9 open reading frame 11                                           |
| Hs.163173.1.28 | chr2:162992781:162988873  | 162992164 | c | NM_022168    | 2  | CDS  | 64135  | IFIH1     | interferon induced with helicase C domain 1                                  |
| Hs.163348.1.3  | chr11:32594061:32593065   | 32593998  | c | NM_001008391 | 6  | CDS  | 493860 | LOC493860 | sarcoma antigen NY-SAR-79                                                    |
| Hs.163909.1.2  | chr2:241855251:241858720  | 241855570 | c | NM_001001891 | 4  | CDS  | 50636  | TMEM16G   | transmembrane protein 16G                                                    |
| Hs.164060.1.25 | chr7:50459976:50458254    | 50459978  | c | NM_001001550 | 7  | CDS  | 2887   | GRB10     | growth factor receptor-bound protein 10                                      |
| Hs.164070.1.19 | chr1:148680556:148675764  | 148680383 | c | NM_176853    | 2  | CDS  | 117145 | CTMP      | C-terminal modulator protein                                                 |
| Hs.164162.1.8  | chr2:43879834:43881530    | 43880155  | c | NM_172069    | 21 | CDS  | 130271 | PLEKHH2   | pleckstrin homology domain containing, family H (with MyTH4 domain) member 2 |
| Hs.1645.1.8    | chr1:47110452:47108003    | 47109201  | c | NM_000778    | 11 | CDS  | 1579   | CYP4A11   | cytochrome P450, family 4, subfamily A, polypeptide 11                       |
| Hs.1645.1.9    | chr1:47110452:47108003    | 47110123  | c | NM_000778    | 11 | CDS  | 1579   | CYP4A11   | cytochrome P450, family 4, subfamily A, polypeptide 11                       |

|                |                           |           |   |           |    |      |        |           |                                                                            |
|----------------|---------------------------|-----------|---|-----------|----|------|--------|-----------|----------------------------------------------------------------------------|
| Hs.164682.1.40 | chr7:91784908:91783377    | 91784830  | c | NM_000466 | 8  | CDS  | 5189   | PEX1      | peroxisome biogenesis factor 1                                             |
| Hs.164705.1.7  | chr11:122280363:122300814 | 122280576 | c | NM_024806 | 3  | CDS  | 79864  | FLJ23554  | hypothetical protein FLJ23554                                              |
| Hs.165328.1.10 | chr16:68577784:68574162   | 68577718  | c | BC063633  | 18 | 3UTR | 283970 | LOC283970 | hypothetical protein LOC283970                                             |
| Hs.165551.1.22 | chr22:16756767:16754302   | 16756401  | c | CR456364  | 6  | CDS  | 57553  | MICAL3    | microtubule associated monooxygenase, calponin and LIM domain containing 3 |
| Hs.165575.1.12 | chr5:41970168:41975299    | 41970949  | c | NM_012176 | 5  | CDS  | 26272  | FBXO4     | F-box protein 4                                                            |
| Hs.165830.1.15 | chr3:170315872:170313365  | 170315612 | c | NM_005241 | 7  | CDS  | 2122   | EV11      | ecotropic viral integration site 1                                         |
| Hs.165830.1.22 | chr3:170321545:170317230  | 170321378 | c | NM_005241 | 6  | CDS  | 2122   | EV11      | ecotropic viral integration site 1                                         |
| Hs.165859.1.14 | chr2:69241724:69261799    | 69242213  | c | NM_018153 | 10 | CDS  | 84168  | ANTXR1    | anthrax toxin receptor 1                                                   |
| Hs.165859.1.27 | chr2:69309073:69320568    | 69309357  | c | NM_032208 | 14 | CDS  | 84168  | ANTXR1    | anthrax toxin receptor 1                                                   |
| Hs.166003.1.3  | chr8:24380392:24382169    | 24381050  | c | NM_003817 | 6  | CDS  | 8756   | ADAM7     | a disintegrin and metalloproteinase domain 7                               |
| Hs.166068.1.14 | chr2:219185987:219178650  | 219185915 | c | NM_020935 | 14 | CDS  | 57695  | USP37     | ubiquitin specific protease 37                                             |
| Hs.166313.1.12 | chr6:153457148:153439793  | 153456773 | c | NM_012419 | 2  | CDS  | 26575  | RGS17     | regulator of G-protein signalling 17                                       |
| Hs.166463.1.16 | chr1:241345799:241345502  | 241345626 | c | NM_004501 | 10 | CDS  | 3192   | HNRPU     | heterogeneous nuclear ribonucleoprotein U (scaffold attachment factor A)   |
| Hs.166924.1.13 | chr3:10328648:10322377    | 10328260  | c | NM_030673 | 6  | CDS  | 6396   | SEC13L1   | SEC13-like 1 (S. cerevisiae)                                               |
| Hs.166924.1.14 | chr3:10328648:10322377    | 10328298  | c | NM_030673 | 6  | CDS  | 6396   | SEC13L1   | SEC13-like 1 (S. cerevisiae)                                               |
| Hs.16695.1.15  | chr3:49821412:49820906    | 49821157  | c | NM_003335 | 18 | CDS  | 7318   | UBE1L     | ubiquitin-activating enzyme E1-like                                        |
| Hs.166975.1.10 | chr14:69305722:69306936   | 69305965  | c | U30827    | 4  | 3UTR | 6430   | SFRS5     | splicing factor, arginine/serine-rich 5                                    |
| Hs.167451.1.13 | chr11:116233735:116225210 | 116232843 | c | NM_025164 | 20 | CDS  | 23387  | KIAA0999  | KIAA0999 protein                                                           |
| Hs.167531.1.23 | chr5:70972667:70975353    | 70972951  | c | BC014897  | 10 | CDS  | 64087  | MCCC2     | methylcrotonoyl-Coenzyme A carboxylase 2 (beta)                            |
| Hs.167531.1.24 | chr5:70972667:70975353    | 70973003  | c | BC014897  | 10 | CDS  | 64087  | MCCC2     | methylcrotonoyl-Coenzyme A carboxylase 2 (beta)                            |
| Hs.16803.1.21  | chr16:217986:217337       | 217746    | c | BC065198  | 1  | CDS  | 55692  | LUC7L     | LUC7-like (S. cerevisiae)                                                  |
| Hs.16803.1.4   | chr16:179967:179340       | 179525    | c | NM_201412 | 9  | CDS  | 55692  | LUC7L     | LUC7-like (S. cerevisiae)                                                  |
| Hs.168718.1.9  | chr4:74728502:74729865    | 74728716  | c | NM_001133 | 10 | CDS  | 173    | AFM       | afamin                                                                     |
| Hs.169047.1.14 | chr19:19220692:19221574   | 19220828  | c | NM_004386 | 13 | CDS  | 1463   | CSPG3     | chondroitin sulfate proteoglycan 3 (neurocan)                              |
| Hs.169441.1.7  | chr3:65321913:65319868    | 65319987  | c | AF401654  | 23 | CDS  | 9223   | MAGI1     | membrane associated guanylate kinase, WW and PDZ domain containing 1       |
| Hs.169943.1.10 | chr8:69267315:69292404    | 69267415  | c | NM_024870 | 37 | CDS  | 80243  | DEPDC2    | DEP domain containing 2                                                    |
| Hs.170128.1.11 | chr8:110608426:110611484  | 110608432 | c | NM_177531 | 77 | CDS  | 93035  | PKHD1L1   | polycystic kidney and hepatic disease 1 (autosomal recessive)-like 1       |
| Hs.170131.1.21 | chr19:3404915:3407547     | 3405348   | c | NM_205843 | 9  | CDS  | 4782   | NFIC      | nuclear factor I/C (CCAAT-binding transcription factor)                    |
| Hs.170422.1.11 | chr13:112767401:112768360 | 112767618 | c | NM_024979 | 7  | CDS  | 23263  | MCF2L     | MCF.2 cell line derived transforming sequence-like                         |
| Hs.170553.1.8  | chr8:17134306:17132729    | 17133395  | c | NM_013354 | 6  | CDS  | 29883  | CNOT7     | CCR4-NOT transcription complex, subunit 7                                  |
| Hs.170835.1.19 | chrX:152248914:152243534  | 152248412 | c | NM_017518 | 4  | CDS  | 55559  | UIP1      | 26S proteasome-associated UCH interacting protein 1                        |
| Hs.171054.1.23 | chr5:31353789:31358681    | 31354192  | c | NM_004932 | 11 | CDS  | 1004   | CDH6      | cadherin 6, type 2, K-cadherin (fetal kidney)                              |
| Hs.171189.1.20 | chr7:17156718:17158114    | 17157378  | c | BC070080  | 11 | 3UTR | 196    | AHR       | aryl hydrocarbon receptor                                                  |
| Hs.171265.1.12 | chr12:67005487:67003288   | 67005052  | c | NM_017440 | 4  | CDS  | 56890  | MDM1      | Mdm4, transformed 3T3 cell double minute 1, p53 binding protein (mouse)    |
| Hs.171265.1.13 | chr12:67005487:67003288   | 67005151  | c | NM_017440 | 4  | CDS  | 56890  | MDM1      | Mdm4, transformed 3T3 cell double minute 1, p53 binding protein (mouse)    |
| Hs.171311.1.7  | chr10:15679211:15674310   | 15678700  | c | NM_003638 | 21 | CDS  | 8516   | ITGA8     | integrin, alpha 8                                                          |
| Hs.171426.1.4  | chr6:126218080:126237727  | 126218932 | c | NM_181782 | 4  | CDS  | 135112 | NCOA7     | nuclear receptor coactivator 7                                             |
| Hs.171458.1.29 | chrX:129762557:129761241  | 129761269 | c | NM_006375 | 1  | 5UTR | 10495  | COVA1     | cytosolic ovarian carcinoma antigen 1                                      |
| Hs.171844.1.18 | chr19:49854009:49856398   | 49854202  | c | NM_006505 | 6  | CDS  | 5817   | PVR       | poliovirus receptor                                                        |
| Hs.17253.1.7   | chr6:33803841:33802662    | 33803545  | c | NM_054111 | 3  | CDS  | 117283 | IHPK3     | inositol hexaphosphate kinase 3                                            |
| Hs.17255.1.12  | chr21:31979232:31966539   | 31978179  | c | NM_020706 | 19 | CDS  | 57466  | SFRS15    | splicing factor, arginine/serine-rich 15                                   |
| Hs.17267.1.11  | chr9:15864662:15910267    | 15864730  | c | NM_173550 | 24 | CDS  | 203238 | C9orf93   | chromosome 9 open reading frame 93                                         |
| Hs.17267.1.4   | chr9:15647218:15656160    | 15650144  | c | NM_173550 | 8  | CDS  | 203238 | C9orf93   | chromosome 9 open reading frame 93                                         |

|                |                           |           |   |              |    |      |        |              |                                                                                                                       |
|----------------|---------------------------|-----------|---|--------------|----|------|--------|--------------|-----------------------------------------------------------------------------------------------------------------------|
| Hs.172847.1.13 | chr11:63756914:63757941   | 63757092  | c | BC044584     | 5  | CDS  | 3338   | DNAJC4       | DnaJ (Hsp40) homolog, subfamily C, member 4                                                                           |
| Hs.173024.1.28 | chr7:150508978:150510581  | 150509358 | c | AF459743     | 12 | CDS  | 51667  | NYREN18      | NEDD8 ultimate buster-1                                                                                               |
| Hs.173059.1.5  | chr5:147261384:147256798  | 147261291 | c | NM_206966    | 2  | CDS  | 389336 | MGC23985     | similar to AVLV472                                                                                                    |
| Hs.173311.1.1  | chr15:38649435:38651094   | 38649558  | c | NM_152260    | 1  | CDS  | 27079  | RPUSD2       | RNA pseudouridylate synthase domain containing 2                                                                      |
| Hs.173716.1.20 | chr20:3605713:3603753     | 3605066   | c | NM_025220    | 3  | CDS  | 80332  | ADAM33       | a disintegrin and metalloproteinase domain 33                                                                         |
| Hs.173939.1.12 | chr2:208994549:208995075  | 208994879 | c | NM_001002881 | 10 | CDS  | 200576 | PIP5K3       | phosphatidylinositol-3-phosphate/phosphatidylinositol 5-kinase, type III                                              |
| Hs.173939.1.14 | chr2:208995244:209002465  | 208995779 | c | NM_001002881 | 11 | CDS  | 200576 | PIP5K3       | phosphatidylinositol-3-phosphate/phosphatidylinositol 5-kinase, type III                                              |
| Hs.173946.1.29 | chr10:30669160:30665963   | 30668729  | c | NM_018109    | 3  | CDS  | 55149  | PAPD1        | PAP associated domain containing 1                                                                                    |
| Hs.173946.1.31 | chr10:30669160:30665963   | 30669089  | c | NM_018109    | 3  | CDS  | 55149  | PAPD1        | PAP associated domain containing 1                                                                                    |
| Hs.17441.1.18  | chr13:109612577:109611718 | 109612257 | c | NM_001845    | 48 | CDS  | 1282   | COL4A1       | collagen, type IV, alpha 1                                                                                            |
| Hs.174768.1.16 | chr7:22006224:21980007    | 22004048  | c | D87467       | 1  | CDS  | 9771   | RAPGEF5      | Rap guanine nucleotide exchange factor (GEF) 5<br>erythrocyte membrane protein band 4.1 (elliptocytosis 1, RH-linked) |
| Hs.175437.1.16 | chr1:29212287:29244934    | 29212349  | c | NM_004437    | 15 | CDS  | 2035   | EPB41        | erythrocyte membrane protein band 4.1 (elliptocytosis 1, RH-linked)                                                   |
| Hs.175551.1.16 | chr1:54416822:54406521    | 54416683  | c | NM_001009955 | 14 | CDS  | 23648  | SSBP3        | single stranded DNA binding protein 3                                                                                 |
| Hs.176013.1.14 | chr20:20157021:20174760   | 20157091  | c | NM_015585    | 18 | CDS  | 26074  | C20orf26     | chromosome 20 open reading frame 26                                                                                   |
| Hs.176227.1.6  | chr4:159491534:159493947  | 159491639 | c | NM_018342    | 3  | CDS  | 55314  | FLJ11155     | hypothetical protein FLJ11155                                                                                         |
| Hs.176227.1.9  | chr4:159491534:159493947  | 159492764 | c | NM_018342    | 3  | CDS  | 55314  | FLJ11155     | hypothetical protein FLJ11155                                                                                         |
| Hs.177275.1.17 | chr6:90395679:90396872    | 90395913  | c | AB023174     | 14 | CDS  | 22881  | ANKRD6       | ankyrin repeat domain 6                                                                                               |
| Hs.177557.1.3  | chr15:88047378:88049788   | 88048713  | c | NM_020212    | 3  | CDS  | 56964  | LOC56964     | hypothetical protein from EUROIMAGE 384293                                                                            |
| Hs.177576.1.29 | chr2:98730425:98720524    | 98730048  | c | NM_012214    | 7  | CDS  | 11320  | MGAT4A       | mannosyl (alpha-1,3-)-glycoprotein beta-1,4-N-acetylglucosaminyltransferase, isoenzyme A                              |
| Hs.177576.1.38 | chr2:98801219:98753453    | 98800920  | c | NM_012214    | 1  | CDS  | 11320  | MGAT4A       | mannosyl (alpha-1,3-)-glycoprotein beta-1,4-N-acetylglucosaminyltransferase, isoenzyme A                              |
| Hs.178121.1.12 | chr4:171301460:171288191  | 171301076 | c | NM_021647    | 1  | CDS  | 9848   | MFAP3L       | microfibrillar-associated protein 3-like                                                                              |
| Hs.178499.1.11 | chr11:129608412:129606821 | 129608335 | c | NM_014155    | 8  | 3UTR | 29068  | BTBD15       | BTB (POZ) domain containing 15                                                                                        |
| Hs.178499.1.3  | chr11:129606743:129605080 | 129605519 | c | NM_014155    | 9  | 3UTR | 29068  | BTBD15       | BTB (POZ) domain containing 15                                                                                        |
| Hs.178499.1.4  | chr11:129606743:129605080 | 129606051 | c | NM_014155    | 9  | 3UTR | 29068  | BTBD15       | BTB (POZ) domain containing 15                                                                                        |
| Hs.178499.1.6  | chr11:129606743:129605080 | 129606411 | c | NM_014155    | 9  | 3UTR | 29068  | BTBD15       | BTB (POZ) domain containing 15                                                                                        |
| Hs.17936.1.11  | chr15:73288271:73290142   | 73288923  | c | BC011905     | 1  | CDS  | 56905  | DKFZP434H132 | DKFZP434H132 protein                                                                                                  |
| Hs.179565.1.20 | chr6:52245986:52245209    | 52245356  | c | NM_002388    | 11 | CDS  | 4172   | MCM3         | MCM3 minichromosome maintenance deficient 3 (S. cerevisiae)                                                           |
| Hs.179608.1.3  | chr2:169754703:169763539  | 169754800 | c | NM_005771    | 4  | 5UTR | 10170  | DHRS9        | dehydrogenase/reductase (SDR family) member 9                                                                         |
| Hs.179615.1.10 | chr9:4619090:4615567      | 4615652   | c | NM_017985    | 5  | CDS  | 55064  | C9orf68      | chromosome 9 open reading frame 68                                                                                    |
| Hs.180191.1.12 | chr1:163706293:163717116  | 163706511 | c | NM_032858    | 8  | CDS  | 84944  | MAEL         | maelstrom homolog (Drosophila)                                                                                        |
| Hs.180848.1.3  | chr5:60430617:60484287    | 60430881  | c | NM_174889    | 3  | CDS  | 91942  | mimitin      | Myc-induced mitochondria protein                                                                                      |
| Hs.180903.1.19 | chr22:49247894:49249537   | 49248325  | c | NM_152299    | 9  | CDS  | 29781  | hCAP-H2      | kleisin beta                                                                                                          |
| Hs.18128.1.18  | chr20:33398380:33365983   | 33395337  | c | NM_018244    | 7  | CDS  | 55245  | C20orf44     | chromosome 20 open reading frame 44                                                                                   |
| Hs.181300.1.32 | chr14:81035555:81034592   | 81034905  | c | NM_005065    | 8  | CDS  | 6400   | SEL1L        | sel-1 suppressor of lin-12-like (C. elegans)                                                                          |
| Hs.181301.1.14 | chr1:147537329:147535721  | 147536789 | c | NM_004079    | 5  | CDS  | 1520   | CTSS         | cathepsin S                                                                                                           |
| Hs.18166.1.45  | chr8:142264560:142268266  | 142264736 | c | NM_014957    | 18 | CDS  | 22898  | KIAA0870     | KIAA0870 protein                                                                                                      |
| Hs.18192.1.29  | chr1:24734602:24738611    | 24734865  | c | NM_005839    | 12 | CDS  | 10250  | SRRM1        | serine/arginine repetitive matrix 1                                                                                   |
| Hs.18259.1.14  | chr2:27775798:27776946    | 27775854  | c | NM_007266    | 11 | CDS  | 11321  | XAB1         | XPA binding protein 1, GTPase                                                                                         |
| Hs.183684.1.32 | chr11:10785377:10785009   | 10785199  | c | NM_001418    | 2  | CDS  | 1982   | EIF4G2       | eukaryotic translation initiation factor 4 gamma, 2                                                                   |
| Hs.183702.1.4  | chr1:167240367:167243289  | 167240458 | c | NM_152281    | 2  | CDS  | 92344  | SCYL1BP1     | SCYL1-like 1 binding protein 1                                                                                        |
| Hs.183706.1.29 | chr4:2943844:2946477      | 2944267   | c | NM_014189    | 10 | CDS  | 118    | ADD1         | adducin 1 (alpha)                                                                                                     |

|                |                           |           |   |              |    |      |        |           |                                                                                                    |
|----------------|---------------------------|-----------|---|--------------|----|------|--------|-----------|----------------------------------------------------------------------------------------------------|
| Hs.183817.1.6  | chr16:22998767:22992703   | 22998586  | c | NM_020718    | 14 | CDS  | 57478  | USP31     | ubiquitin specific protease 31                                                                     |
| Hs.184233.1.25 | chr5:137930213:137925378  | 137930134 | c | NM_004134    | 9  | CDS  | 3313   | HSPA9B    | heat shock 70kDa protein 9B (mortalin-2)                                                           |
| Hs.184727.1.30 | chr3:198241840:198239667  | 198240723 | c | NM_005929    | 3  | CDS  | 4241   | MF12      | antigen p97 (melanoma associated) identified by monoclonal antibodies 133.2 and 96.5               |
| Hs.184727.1.34 | chr3:198244834:198243092  | 198243275 | c | NM_005929    | 1  | CDS  | 4241   | MF12      | antigen p97 (melanoma associated) identified by monoclonal antibodies 133.2 and 96.5               |
| Hs.184993.1.2  | chrX:118819432:118835755  | 118819498 | c | NM_001008534 | 4  | CDS  | 158798 | AKAP14    | A kinase (PRKA) anchor protein 14                                                                  |
| Hs.185674.1.5  | chr19:58734349:58750910   | 58734428  | c | NM_018555    | 4  | 5UTR | 55422  | ZNF331    | zinc finger protein 331                                                                            |
| Hs.185774.1.6  | chr1:27999187:27989128    | 27999132  | c | NM_001990    | 16 | CDS  | 2140   | EYA3      | eyes absent homolog 3 (Drosophila)                                                                 |
| Hs.187376.1.25 | chr13:20113538:20115593   | 20113922  | c | NM_006531    | 18 | CDS  | 8100   | TTC10     | tetratricopeptide repeat domain 10                                                                 |
| Hs.187376.1.26 | chr13:20113538:20115593   | 20115035  | c | NM_006531    | 18 | CDS  | 8100   | TTC10     | tetratricopeptide repeat domain 10                                                                 |
| Hs.187635.1.32 | chr20:21161469:21172882   | 21161552  | c | NM_018474    | 11 | CDS  | 55857  | C20orf19  | chromosome 20 open reading frame 19                                                                |
| Hs.187861.1.10 | chr3:24206568:24168986    | 24206379  | c | NM_000461    | 4  | CDS  | 7068   | THRB      | thyroid hormone receptor, beta (erythroblastic leukemia viral (v-erb-a) oncogene homolog 2, avian) |
| Hs.188464.1.4  | chr4:6698298:6706794      | 6698620   | c | NM_015274    | 3  | CDS  | 23324  | MAN2B2    | mannosidase, alpha, class 2B, member 2                                                             |
| Hs.188464.1.5  | chr4:6698298:6706794      | 6698672   | c | NM_015274    | 3  | CDS  | 23324  | MAN2B2    | mannosidase, alpha, class 2B, member 2                                                             |
| Hs.188495.1.11 | chr10:1132187:1139541     | 1132566   | c | NM_014023    | 9  | CDS  | 22884  | WDR37     | WD repeat domain 37                                                                                |
| Hs.188495.1.9  | chr10:1122298:1129391     | 1122679   | c | NM_014023    | 7  | CDS  | 22884  | WDR37     | WD repeat domain 37                                                                                |
| Hs.188553.1.17 | chr16:24478500:24480433   | 24478606  | c | NM_006910    | 8  | CDS  | 5930   | RBBP6     | retinoblastoma binding protein 6                                                                   |
| Hs.188591.1.16 | chr11:86703238:86706826   | 86703355  | c | NM_022918    | 12 | CDS  | 65084  | FLJ22104  | hypothetical protein FLJ22104                                                                      |
| Hs.188757.1.12 | chr6:36557515:36560468    | 36557779  | c | NM_173562    | 6  | CDS  | 222658 | C6orf69   | chromosome 6 open reading frame 69                                                                 |
| Hs.188757.1.13 | chr6:36557515:36560468    | 36557849  | c | NM_173562    | 6  | CDS  | 222658 | C6orf69   | chromosome 6 open reading frame 69                                                                 |
| Hs.18925.1.24  | chr3:3184317:3172966      | 3184114   | c | NM_016302    | 5  | CDS  | 51185  | CRBN      | cereblon                                                                                           |
| Hs.189409.1.11 | chr9:129737670:129732380  | 129737100 | c | NM_015033    | 16 | CDS  | 23048  | FNBP1     | formin binding protein 1                                                                           |
| Hs.189409.1.12 | chr9:129737670:129732380  | 129737195 | c | NM_015033    | 16 | CDS  | 23048  | FNBP1     | formin binding protein 1                                                                           |
| Hs.189409.1.13 | chr9:129737670:129732380  | 129737343 | c | NM_015033    | 16 | CDS  | 23048  | FNBP1     | formin binding protein 1                                                                           |
| Hs.189445.1.43 | chr8:99115064:99117060    | 99115176  | c | NM_002380    | 18 | CDS  | 4147   | MATN2     | matrilin 2                                                                                         |
| Hs.189585.1.23 | chr21:46790303:46791255   | 46790647  | c | NM_015151    | 20 | CDS  | 23181  | C21orf106 | chromosome 21 open reading frame 106                                                               |
| Hs.189585.1.25 | chr21:46791384:46794111   | 46791545  | c | NM_015151    | 21 | CDS  | 23181  | C21orf106 | chromosome 21 open reading frame 106                                                               |
| Hs.189585.1.29 | chr21:46794227:46794883   | 46794447  | c | NM_015151    | 22 | CDS  | 23181  | C21orf106 | chromosome 21 open reading frame 106                                                               |
| Hs.189915.1.10 | chr6:17880117:17879429    | 17879817  | c | NM_022113    | 37 | CDS  | 63971  | KIF13A    | kinesin family member 13A                                                                          |
| Hs.189915.1.4  | chr6:17872364:17869088    | 17871905  | c | AJ291579     | 37 | CDS  | 63971  | KIF13A    | kinesin family member 13A                                                                          |
| Hs.189920.1.35 | chr3:52618368:52612789    | 52618137  | c | NM_018165    | 15 | CDS  | 55193  | PB1       | polybromo 1                                                                                        |
| Hs.190043.1.1  | chrX:14651538:14670501    | 14652233  | c | NM_152581    | 2  | CDS  | 158747 | MOSPD2    | motile sperm domain containing 2                                                                   |
| Hs.19012.1.12  | chr9:125062534:125069742  | 125064219 | c | NM_005833    | 5  | CDS  | 10244  | RABEPK    | Rab9 effector protein with kelch motifs                                                            |
| Hs.190162.1.13 | chr1:54274539:54288745    | 54274986  | c | AK096488     | 4  | 3UTR | 127428 | C1orf83   | chromosome 1 open reading frame 83                                                                 |
| Hs.190394.1.7  | chr19:58618568:58620135   | 58618861  | c | NM_138372    | 3  | UTR  | 91661  | LOC91661  | hypothetical protein BC001610                                                                      |
| Hs.190413.1.3  | chr3:10120881:10098216    | 10120828  | c | NM_173472    | 2  | 3UTR | 115795 | MGC40179  | hypothetical protein MGC40179                                                                      |
| Hs.190495.1.14 | chr7:23069925:23072838    | 23070901  | c | NM_001005340 | 4  | CDS  | 10457  | GPNMB     | glycoprotein (transmembrane) nmb                                                                   |
| Hs.190495.1.26 | chr7:23086474:23086923    | 23086788  | c | NM_001005340 | 10 | CDS  | 10457  | GPNMB     | glycoprotein (transmembrane) nmb                                                                   |
| Hs.190983.1.14 | chr13:100075789:100064686 | 100075712 | c | NM_032813    | 9  | CDS  | 84899  | FLJ14624  | hypothetical protein FLJ14624                                                                      |
| Hs.191036.1.6  | chr3:42762418:42759554    | 42762014  | c | NM_144719    | 7  | CDS  | 152206 | CCDC13    | coiled-coil domain containing 13                                                                   |
| Hs.191074.1.2  | chr11:74383414:74394105   | 74383731  | c | NM_006656    | 2  | CDS  | 10825  | NEU3      | sialidase 3 (membrane sialidase)                                                                   |
| Hs.191186.1.16 | chr11:43379685:43382123   | 43379748  | c | NM_018259    | 10 | CDS  | 55761  | TTC17     | tetratricopeptide repeat domain 17                                                                 |
| Hs.19121.1.19  | chr11:978690:982502       | 978827    | c | NM_012305    | 10 | CDS  | 161    | AP2A2     | adaptor-related protein complex 2, alpha 2 subunit                                                 |
| Hs.191540.1.30 | chr8:100659038:100723214  | 100659189 | c | NM_017890    | 33 | CDS  | 157680 | VPS13B    | vacuolar protein sorting 13B (yeast)                                                               |
| Hs.191540.1.7  | chr8:100202850:100216035  | 100203166 | c | NM_015243    | 8  | CDS  | 157680 | VPS13B    | vacuolar protein sorting 13B (yeast)                                                               |
| Hs.19196.1.5   | chr7:43761577:43763437    | 43762036  | c | NM_015983    | 5  | CDS  | 51619  | UBE2D4    | ubiquitin-conjugating enzyme E2D 4 (putative)                                                      |
| Hs.192039.1.23 | chr1:195407739:195408918  | 195407782 | c | NM_002838    | 9  | CDS  | 5788   | PTPRC     | protein tyrosine phosphatase, receptor type, C                                                     |
| Hs.192039.1.7  | chr1:195393160:195404083  | 195393992 | c | NM_080921    | 3  | CDS  | 5788   | PTPRC     | protein tyrosine phosphatase, receptor type, C                                                     |
| Hs.192649.1.12 | chr11:93809990:93808714   | 93809901  | c | NM_005590    | 16 | CDS  | 4361   | MRE11A    | MRE11 meiotic recombination 11 homolog A (S. cerevisiae)                                           |

|                |                           |           |   |              |    |      |        |               |                                                                                      |
|----------------|---------------------------|-----------|---|--------------|----|------|--------|---------------|--------------------------------------------------------------------------------------|
| Hs.193118.1.30 | chr10:80737335:80740686   | 80737801  | c | NM_020338    | 19 | CDS  | 57178  | RAI17         | retinoic acid induced 17                                                             |
| Hs.193418.1.4  | chr1:7927487:7915250      | 7927453   | c | NM_001561    | 7  | CDS  | 3604   | TNFRSF9       | tumor necrosis factor receptor superfamily, member 9                                 |
| Hs.193842.1.9  | chr9:97283713:97302014    | 97284060  | c | NM_014290    | 6  | CDS  | 23424  | TDRD7         | tudor domain containing 7                                                            |
| Hs.194035.1.3  | chr14:21025693:21026588   | 21025897  | c | NM_014828    | 3  | CDS  | 9878   | C14orf92      | chromosome 14 open reading frame 92                                                  |
| Hs.194303.1.10 | chr10:44815739:44814877   | 44815696  | c | BC062568     | 2  | 3UTR | 220979 | C10orf25      | chromosome 10 open reading frame 25                                                  |
| Hs.194303.1.5  | chr10:44814770:44809661   | 44814540  | c | BC062568     | 3  | 3UTR | 220979 | C10orf25      | chromosome 10 open reading frame 25                                                  |
| Hs.194303.1.6  | chr10:44814770:44809661   | 44814688  | c | BC062568     | 3  | 3UTR | 220979 | C10orf25      | chromosome 10 open reading frame 25                                                  |
| Hs.194350.1.13 | chr19:14065439:14065050   | 14065081  | c | NM_002730    | 9  | CDS  | 5566   | PRKACA        | protein kinase, cAMP-dependent, catalytic, alpha                                     |
| Hs.194350.1.16 | chr19:14069172:14065605   | 14069060  | c | NM_002730    | 8  | CDS  | 5566   | PRKACA        | protein kinase, cAMP-dependent, catalytic, alpha                                     |
| Hs.194392.1.4  | chr19:37594119:37615461   | 37595933  | c | NM_207325    | 3  | CDS  | 147991 | DPY19L3       | dpy-19-like 3 (C. elegans)                                                           |
| Hs.194411.1.5  | chr17:31273693:31271390   | 31273598  | c | NM_145654    | 5  | CDS  | 201299 | RAD52B        | RAD52 homolog B (S. cerevisiae)                                                      |
| Hs.195364.1.31 | chr3:37064179:37065011    | 37064235  | c | NM_000249    | 16 | CDS  | 4292   | MLH1          | mutL homolog 1, colon cancer, nonpolyposis type 2 (E. coli)                          |
| Hs.195395.1.26 | chr17:64643827:64642479   | 64642966  | c | NM_080284    | 4  | CDS  | 23460  | ABCA6         | ATP-binding cassette, sub-family A (ABC1), member 6                                  |
| Hs.195642.1.33 | chr17:75962985:75964154   | 75963454  | c | NM_020914    | 25 | CDS  | 57674  | C17orf27      | chromosome 17 open reading frame 27                                                  |
| Hs.195642.1.48 | chr17:75970123:75971373   | 75970707  | c | NM_020914    | 32 | CDS  | 57674  | C17orf27      | chromosome 17 open reading frame 27                                                  |
| Hs.195799.1.4  | chr4:100861853:100867977  | 100862521 | c | NM_000253    | 3  | CDS  | 4547   | MTP           | microsomal triglyceride transfer protein (large polypeptide, 88kDa)                  |
| Hs.1968.1.9    | chr20:43270323:43270502   | 43270388  | c | NM_198139    | 2  | CDS  | 6406   | SEMG1         | semenogelin I                                                                        |
| Hs.196983.1.3  | chr2:182582894:182586262  | 182584925 | c | NM_006751    | 2  | CDS  | 6744   | SSFA2         | sperm specific antigen 2                                                             |
| Hs.196983.1.36 | chr2:182612646:182619793  | 182612934 | c | NM_006751    | 16 | CDS  | 6744   | SSFA2         | sperm specific antigen 2                                                             |
| Hs.19699.1.34  | chr16:107299:102775       | 104982    | c | NM_012075    | 5  | CDS  | 8131   | C16orf35      | chromosome 16 open reading frame 35                                                  |
| Hs.196990.1.26 | chr10:114194917:114193355 | 114194785 | c | NM_022494    | 2  | CDS  | 64429  | ZDHHC6        | zinc finger, DHHC-type containing 6                                                  |
| Hs.196990.1.27 | chr10:114194917:114193355 | 114194874 | c | NM_022494    | 2  | CDS  | 64429  | ZDHHC6        | zinc finger, DHHC-type containing 6                                                  |
| Hs.198072.1.4  | chr1:66443792:66510211    | 66443859  | c | NM_002600    | 7  | CDS  | 5142   | PDE4B         | phosphodiesterase 4B, cAMP-specific (phosphodiesterase E4 dunce homolog, Drosophila) |
| Hs.198158.1.10 | chr10:69715110:69714053   | 69714846  | c | NM_022129    | 9  | CDS  | 64081  | MAWBP         | MAWD binding protein                                                                 |
| Hs.198998.1.13 | chr10:101943044:101940716 | 101942774 | c | NM_001278    | 19 | CDS  | 1147   | CHUK          | conserved helix-loop-helix ubiquitous kinase                                         |
| Hs.199338.1.11 | chr7:41836306:41791588    | 41836061  | c | NM_000168    | 9  | CDS  | 2737   | GLI3          | GLI-Kruppel family member GLI3 (Greig cephalopolysyndactyly syndrome)                |
| Hs.199338.1.20 | chr7:42035968:41961308    | 42034455  | c | NM_000168    | 1  | CDS  | 2737   | GLI3          | GLI-Kruppel family member GLI3 (Greig cephalopolysyndactyly syndrome)                |
| Hs.199743.1.22 | chr11:85853780:85851368   | 85853627  | c | AK092181     | 8  | CDS  | 10873  | ME3           | malic enzyme 3, NADP(+)-dependent, mitochondrial                                     |
| Hs.200230.1.5  | chr1:108883469:108884251  | 108883718 | c | NM_001010883 | 9  | CDS  | 284611 | LOC284611     | hypothetical protein LOC284611                                                       |
| Hs.200600.1.6  | chr1:152040148:152039656  | 152039805 | c | NM_005698    | 7  | CDS  | 10067  | SCAMP3        | secretory carrier membrane protein 3                                                 |
| Hs.200738.1.15 | chr14:60566995:60573529   | 60567508  | c | NM_153811    | 6  | CDS  | 145389 | SLC38A6       | solute carrier family 38, member 6                                                   |
| Hs.200747.1.35 | chr14:75319627:75329011   | 75319701  | c | NM_015072    | 26 | CDS  | 23093  | TTL5          | tubulin tyrosine ligase-like family, member 5                                        |
| Hs.200841.1.10 | chr6:129555692:129612949  | 129555977 | c | NM_000426    | 12 | CDS  | 3908   | LAMA2         | laminin, alpha 2 (merosin, congenital muscular dystrophy)                            |
| Hs.200943.1.19 | chr15:58521906:58515719   | 58517311  | c | NM_024611    | 12 | CDS  | 79664  | NARG2         | NMDA receptor regulated 2                                                            |
| Hs.20107.1.27  | chr14:103221127:103221727 | 103221362 | c | NM_005552    | 14 | 3UTR | 3831   | KNS2          | kinesin 2 60/70kDa                                                                   |
| Hs.201134.1.4  | chr17:37346707:37348335   | 37346820  | c | NM_031421    | 5  | CDS  | 83538  | DKFZP434H0115 | hypothetical protein DKFZp434H0115                                                   |
| Hs.201253.1.71 | chr11:46768201:46766900   | 46768058  | c | NM_001008938 | 15 | CDS  | 9793   | CKAP5         | cytoskeleton associated protein 5                                                    |
| Hs.20142.1.7   | chr14:92742927:92739881   | 92742617  | c | NM_032490    | 1  | 5UTR | 84520  | C14orf142     | chromosome 14 open reading frame 142                                                 |
| Hs.20158.1.18  | chr9:32991513:32979894    | 32990858  | c | AY208833     | 1  | 5UTR | 54840  | APTX          | aprataxin                                                                            |
| Hs.201712.1.32 | chr16:73060344:73059248   | 73060202  | c | NM_012201    | 17 | CDS  | 2734   | GLG1          | golgi apparatus protein 1                                                            |
| Hs.201921.1.11 | chr1:112796614:112795537  | 112796454 | c | NM_198327    | 15 | CDS  | 54879  | ST7L          | suppression of tumorigenicity 7 like                                                 |
| Hs.201921.1.26 | chr1:112865504:112855513  | 112865123 | c | NM_017744    | 3  | CDS  | 54879  | ST7L          | suppression of tumorigenicity 7 like                                                 |

|                |                          |           |   |              |    |     |        |             |                                                                      |
|----------------|--------------------------|-----------|---|--------------|----|-----|--------|-------------|----------------------------------------------------------------------|
| Hs.202001.1.37 | chr18:27708440:27707500  | 27707531  | c | NM_014939    | 13 | CDS | 22878  | KIAA1012    | KIAA1012                                                             |
| Hs.202011.1.14 | chr17:59183031:59178054  | 59182859  | c | NM_020198    | 12 | CDS | 57003  | GK001       | GK001 protein                                                        |
| Hs.202120.1.10 | chr7:105239085:105247256 | 105239222 | c | NM_152750    | 8  | CDS | 222256 | FLJ23834    | hypothetical protein FLJ23834                                        |
| Hs.202166.1.23 | chr5:178978875:178977931 | 178978800 | c | NM_005520    | 5  | CDS | 3187   | HNRPH1      | heterogeneous nuclear ribonucleoprotein H1 (H)                       |
| Hs.202238.1.33 | chr8:95592588:95592057   | 95592382  | c | NM_015496    | 13 | CDS | 25962  | DKFZP434116 | DKFZP434116 protein                                                  |
| Hs.2025.1.12   | chr14:75499411:75497173  | 75499157  | c | NM_003239    | 5  | CDS | 7043   | TGFB3       | transforming growth factor, beta 3                                   |
| Hs.202510.1.16 | chr6:26081493:26091370   | 26081833  | c | NM_006355    | 7  | CDS | 10475  | TRIM38      | tripartite motif-containing 38                                       |
| Hs.202543.1.1  | chr7:101984035:101986089 | 101984132 | c | NM_147194    | 1  | CDS | 222234 | MGC35361    | hypothetical protein MGC35361                                        |
| Hs.203099.1.29 | chr10:88217015:88211025  | 88216790  | c | NM_015045    | 9  | CDS | 23063  | KIAA0261    | KIAA0261                                                             |
| Hs.203637.1.17 | chr3:143899608:143905407 | 143899781 | c | NM_002670    | 12 | CDS | 5357   | PLS1        | plastin 1 (I isoform)                                                |
| Hs.203691.1.14 | chr3:100003133:100002251 | 100002920 | c | NM_080927    | 14 | CDS | 131566 | DCBLD2      | discoidin, CUB and LCCL domain containing 2                          |
| Hs.203691.1.15 | chr3:100009614:100003184 | 100009445 | c | NM_080927    | 13 | CDS | 131566 | DCBLD2      | discoidin, CUB and LCCL domain containing 2                          |
| Hs.203691.1.36 | chr3:100050994:100026901 | 100050922 | c | NM_080927    | 3  | CDS | 131566 | DCBLD2      | discoidin, CUB and LCCL domain containing 2                          |
| Hs.203717.1.20 | chr2:216065442:216063641 | 216065234 | c | NM_002026    | 37 | CDS | 2335   | FN1         | fibronectin 1                                                        |
| Hs.203717.1.25 | chr2:216068403:216066904 | 216068176 | c | NM_002026    | 34 | CDS | 2335   | FN1         | fibronectin 1                                                        |
| Hs.203717.1.5  | chr2:216052197:216051856 | 216052080 | c | NM_002026    | 45 | CDS | 2335   | FN1         | fibronectin 1                                                        |
| Hs.203717.1.55 | chr2:216094617:216089581 | 216094583 | c | NM_002026    | 20 | CDS | 2335   | FN1         | fibronectin 1                                                        |
| Hs.203717.1.65 | chr2:216105065:216100344 | 216101097 | c | NM_002026    | 13 | CDS | 2335   | FN1         | fibronectin 1                                                        |
| Hs.203717.1.67 | chr2:216105065:216100344 | 216104890 | c | NM_002026    | 13 | CDS | 2335   | FN1         | fibronectin 1                                                        |
| Hs.203717.1.82 | chr2:216118408:216115515 | 216118229 | c | NM_002026    | 6  | CDS | 2335   | FN1         | fibronectin 1                                                        |
| Hs.20395.1.17  | chr8:61899130:61903775   | 61900528  | c | NM_017780    | 13 | CDS | 55636  | CHD7        | chromodomain helicase DNA binding protein 7                          |
| Hs.203952.1.36 | chr7:98209973:98212385   | 98210286  | c | NM_003496    | 49 | CDS | 8295   | TRRAP       | transformation/transcription domain-associated protein               |
| Hs.203965.1.12 | chr7:77196747:77203076   | 77197360  | c | NM_020432    | 10 | CDS | 57157  | PHTF2       | putative homeodomain transcription factor 2                          |
| Hs.203965.1.18 | chr7:77211807:77213997   | 77211981  | c | NM_020432    | 12 | CDS | 57157  | PHTF2       | putative homeodomain transcription factor 2                          |
| Hs.203965.1.19 | chr7:77211807:77213997   | 77212176  | c | NM_020432    | 12 | CDS | 57157  | PHTF2       | putative homeodomain transcription factor 2                          |
| Hs.203965.1.24 | chr7:77214271:77214495   | 77214346  | c | NM_020432    | 13 | CDS | 57157  | PHTF2       | putative homeodomain transcription factor 2                          |
| Hs.203965.1.25 | chr7:77214271:77214495   | 77214427  | c | NM_020432    | 13 | CDS | 57157  | PHTF2       | putative homeodomain transcription factor 2                          |
| Hs.204041.1.4  | chr14:76995903:76998255  | 76999630  | c | NM_012111    | 2  | CDS | 10598  | AHSA1       | AHA1, activator of heat shock 90kDa protein ATPase homolog 1 (yeast) |
| Hs.204619.1.17 | chr2:200629161:200626722 | 200628978 | c | NM_152382    | 4  | UTR | 129450 | FLJ37953    | hypothetical protein FLJ37953                                        |
| Hs.204619.1.20 | chr2:200633993:200630363 | 200632290 | c | NM_152382    | 2  | UTR | 129450 | FLJ37953    | hypothetical protein FLJ37953                                        |
| Hs.206500.1.16 | chr11:69943611:69944153  | 69943711  | c | NM_005231    | 9  | CDS | 2017   | CTTN        | cortactin                                                            |
| Hs.206500.1.41 | chr11:69958874:69959219  | 69959158  | c | BC033889     | 18 | CDS | 2017   | CTTN        | cortactin                                                            |
| Hs.206500.1.5  | chr11:69931346:69933584  | 69931514  | c | NM_005231    | 4  | CDS | 2017   | CTTN        | cortactin                                                            |
| Hs.207157.1.3  | chr15:63010837:63013388  | 63011765  | c | NM_182703    | 5  | CDS | 348094 | LOC348094   | hypothetical protein LOC348094                                       |
| Hs.207538.1.8  | chr1:64992545:65008542   | 64994195  | c | NM_018211    | 11 | CDS | 55225  | RAVER2      | hypothetical protein FLJ10770                                        |
| Hs.2076.1.6    | chr8:146046736:146037933 | 146046371 | c | NM_014066    | 2  | UTR | 28991  | COMMD5      | COMM domain containing 5                                             |
| Hs.207745.1.4  | chr20:35065518:35060747  | 35065391  | c | NM_002895    | 21 | CDS | 5933   | RBL1        | retinoblastoma-like 1 (p107)                                         |
| Hs.208388.1.10 | chr3:10056530:10058306   | 10058246  | c | NM_001018115 | 9  | CDS | 2177   | FANCD2      | Fanconi anemia, complementation group D2                             |
| Hs.208388.1.17 | chr3:10066190:10069070   | 10066300  | c | NM_001018115 | 17 | CDS | 2177   | FANCD2      | Fanconi anemia, complementation group D2                             |
| Hs.208388.1.36 | chr3:10115500:101117871  | 10115696  | c | NM_001018115 | 43 | CDS | 2177   | FANCD2      | Fanconi anemia, complementation group D2                             |
| Hs.208550.1.16 | chr13:51228600:51230328  | 51228809  | c | NM_052950    | 10 | CDS | 115825 | WDFY2       | WD repeat and FYVE domain containing 2                               |
| Hs.208600.1.8  | chr21:42675242:42673391  | 42675054  | c | NM_024022    | 9  | CDS | 64699  | TMPRSS3     | transmembrane protease, serine 3                                     |
| Hs.208680.1.14 | chr16:69074132:69073580  | 69073784  | c | NM_015386    | 15 | CDS | 25839  | COG4        | component of oligomeric golgi complex 4                              |
| Hs.208765.1.27 | chr14:66705507:66716047  | 66705604  | c | BC030016     | 21 | CDS | 10243  | GPHN        | gephyrin                                                             |
| Hs.208912.1.9  | chr22:40665728:40664206  | 40665425  | c | NM_024053    | 4  | CDS | 79019  | C22orf18    | chromosome 22 open reading frame 18                                  |
| Hs.209945.1.22 | chr14:89569312:89579166  | 89569709  | c | NM_001008744 | 15 | CDS | 55775  | TDP1        | tyrosyl-DNA phosphodiesterase 1                                      |
| Hs.210283.1.17 | chr9:134849919:134856264 | 134850460 | c | NM_000093    | 9  | CDS | 1289   | COL5A1      | collagen, type V, alpha 1                                            |
| Hs.210367.1.12 | chr12:44602512:44602245  | 44602406  | c | NM_004719    | 4  | CDS | 9169   | SFRS2IP     | splicing factor, arginine/serine-rich 2, interacting protein         |
| Hs.210532.1.16 | chr5:141293151:141293988 | 141293631 | c | NM_014773    | 8  | CDS | 9812   | KIAA0141    | KIAA0141                                                             |
| Hs.210532.1.25 | chr5:141294336:141296946 | 141294745 | c | NM_014773    | 10 | CDS | 9812   | KIAA0141    | KIAA0141                                                             |



|                |                           |           |   |           |    |     |        |          |                                                                                                                                  |
|----------------|---------------------------|-----------|---|-----------|----|-----|--------|----------|----------------------------------------------------------------------------------------------------------------------------------|
| Hs.210850.1.51 | chr14:30666741:30662005   | 30666488  | c | NM_015382 | 25 | CDS | 25831  | HECTD1   | HECT domain containing 1                                                                                                         |
| Hs.210850.1.76 | chr14:30712112:30711080   | 30711911  | c | NM_015382 | 6  | CDS | 25831  | HECTD1   | HECT domain containing 1                                                                                                         |
| Hs.211092.1.8  | chr20:31291853:31292851   | 31292529  | c | NM_016583 | 5  | CDS | 51297  | PLUNC    | palate, lung and nasal epithelium carcinoma associated                                                                           |
| Hs.211236.1.8  | chr1:107579587:107649817  | 107579838 | c | NM_014917 | 3  | CDS | 22854  | NTNG1    | netrin G1                                                                                                                        |
| Hs.211441.1.18 | chr9:93517627:93518430    | 93517634  | c | NM_005392 | 20 | CDS | 5253   | PHF2     | PHD finger protein 2                                                                                                             |
| Hs.211520.1.12 | chr9:5759257:5760086      | 5759454   | c | AB037853  | 6  | CDS | 57589  | KIAA1432 | KIAA1432                                                                                                                         |
| Hs.21187.1.6   | chr10:116709557:116720116 | 116709761 | c | NM_139169 | 4  | CDS | 14290  | TRUB1    | TruB pseudouridine (psi) synthase homolog 1 (E. coli)                                                                            |
| Hs.212046.1.14 | chr5:102497252:102500334  | 102497374 | c | NM_015216 | 2  | CDS | 23262  | KIAA0433 | KIAA0433 protein                                                                                                                 |
| Hs.212360.1.12 | chr5:13964494:13955248    | 13964465  | c | NM_001369 | 12 | CDS | 1767   | DNAH5    | dynein, axonemal, heavy polypeptide 5                                                                                            |
| Hs.212774.1.33 | chr4:68356672:68343696    | 68356147  | c | NM_018227 | 13 | CDS | 55236  | FLJ10808 | hypothetical protein FLJ10808                                                                                                    |
| Hs.213044.1.3  | chr7:100411211:100410237  | 100410420 | c | NM_198571 | 2  | CDS | 375607 | FLJ39237 | FLJ39237 protein                                                                                                                 |
| Hs.213392.1.11 | chr7:66218853:66229239    | 66219406  | c | BC026058  | 4  | CDS | 64940  | FLJ13195 | stromal antigen 3-like                                                                                                           |
| Hs.213393.1.1  | chr5:76362558:76365998    | 76362898  | c | NM_018046 | 1  | CDS | 55109  | AGGF1    | angiogenic factor with G patch and FHA domains 1                                                                                 |
| Hs.213393.1.2  | chr5:76362558:76365998    | 76363014  | c | NM_018046 | 1  | CDS | 55109  | AGGF1    | angiogenic factor with G patch and FHA domains 1                                                                                 |
| Hs.213861.1.63 | chr6:112600505:112593172  | 112599525 | c | NM_002290 | 12 | CDS | 3910   | LAMA4    | laminin, alpha 4                                                                                                                 |
| Hs.213861.1.81 | chr6:112681850:112644364  | 112681256 | c | NM_002290 | 2  | CDS | 3910   | LAMA4    | laminin, alpha 4                                                                                                                 |
| Hs.213861.1.82 | chr6:112681850:112644364  | 112681683 | c | NM_002290 | 2  | CDS | 3910   | LAMA4    | laminin, alpha 4                                                                                                                 |
| Hs.21398.1.10  | chr4:44550696:44546088    | 44546193  | c | NM_138335 | 6  | CDS | 132789 | GNPDA2   | glucosamine-6-phosphate deaminase 2                                                                                              |
| Hs.21422.1.17  | chr7:107414617:107412509  | 107414363 | c | NM_005010 | 24 | CDS | 4897   | NRCAM    | neuronal cell adhesion molecule                                                                                                  |
| Hs.2157.1.17   | chrX:48304074:48305747    | 48304233  | c | NM_000377 | 11 | CDS | 7454   | WAS      | Wiskott-Aldrich syndrome (eczema-thrombocytopenia)                                                                               |
| Hs.2159.1.10   | chr15:87193967:87196028   | 87195759  | c | NM_001135 | 11 | CDS | 176    | AGC1     | aggrecan 1 (chondroitin sulfate proteoglycan 1, large aggregating proteoglycan, antigen identified by monoclonal antibody A0122) |
| Hs.21611.1.23  | chr2:26088786:26086426    | 26088651  | c | NM_002254 | 4  | CDS | 3797   | KIF3C    | kinesin family member 3C                                                                                                         |
| Hs.217409.1.12 | chr10:99369333:99367070   | 99369157  | c | NM_178832 | 2  | CDS | 118812 | C10orf83 | chromosome 10 open reading frame 83                                                                                              |
| Hs.21757.1.4   | chr1:67124000:67135762    | 67125944  | c | NM_020948 | 5  | CDS | 57708  | MIER1    | mesoderm induction early response 1 homolog (Xenopus laevis)                                                                     |
| Hs.218040.1.12 | chr17:42723454:42724503   | 42723852  | c | NM_000212 | 9  | CDS | 3690   | ITGB3    | integrin, beta 3 (platelet glycoprotein IIIa, antigen CD61)                                                                      |
| Hs.21975.1.3   | chr2:124716201:124891249  | 124716252 | c | NM_130773 | 3  | CDS | 129684 | CNTNAP5  | contactin associated protein-like 5                                                                                              |
| Hs.21975.1.6   | chr2:125083728:125121564  | 125084026 | c | NM_130773 | 12 | CDS | 129684 | CNTNAP5  | contactin associated protein-like 5                                                                                              |
| Hs.22111.1.33  | chrX:130144687:130142774  | 130143676 | c | NM_001555 | 5  | CDS | 3547   | IGSF1    | immunoglobulin superfamily, member 1                                                                                             |
| Hs.221497.1.9  | chr16:9104618:9118025     | 9104899   | c | NM_014117 | 3  | CDS | 29035  | PRO0149  | PRO0149 protein                                                                                                                  |
| Hs.222055.1.15 | chr5:149899112:149899836  | 149899364 | c | NM_001543 | 6  | CDS | 3340   | NDST1    | N-deacetylase/N-sulfotransferase (heparan glucosaminyl) 1                                                                        |
| Hs.222055.1.16 | chr5:149899112:149899836  | 149899522 | c | NM_001543 | 6  | CDS | 3340   | NDST1    | N-deacetylase/N-sulfotransferase (heparan glucosaminyl) 1                                                                        |
| Hs.222282.1.13 | chr7:92546697:92550127    | 92547451  | c | NM_017667 | 11 | CDS | 55610  | FLJ20097 | hypothetical protein FLJ20097                                                                                                    |
| Hs.222282.1.15 | chr7:92550269:92565665    | 92550391  | c | NM_017667 | 12 | CDS | 55610  | FLJ20097 | hypothetical protein FLJ20097                                                                                                    |
| Hs.22242.1.9   | chr10:11837614:11845228   | 11838294  | c | NM_024693 | 4  | CDS | 79746  | ECHDC3   | enoyl Coenzyme A hydratase domain containing 3                                                                                   |
| Hs.222731.1.5  | chr16:83249052:83250866   | 83249081  | c | NM_024731 | 3  | CDS | 79786  | C16orf44 | chromosome 16 open reading frame 44                                                                                              |
| Hs.223296.1.9  | chr3:197943318:197946172  | 197943532 | c | NM_017861 | 4  | CDS | 54965  | PIGX     | phosphatidylinositol glycan, class X                                                                                             |
| Hs.223617.1.13 | chr12:120681497:120680289 | 120681360 | c | NM_019034 | 4  | CDS | 54509  | RHOF     | ras homolog gene family, member F (in filopodia)                                                                                 |
| Hs.223894.1.4  | chr19:18031703:18031424   | 18031547  | c | NM_005535 | 16 | CDS | 3594   | IL12RB1  | interleukin 12 receptor, beta 1                                                                                                  |
| Hs.224008.1.23 | chr11:124864572:124856740 | 124863306 | c | NM_005103 | 2  | CDS | 9638   | FEZ1     | fasciculation and elongation protein zeta 1 (zygin I)                                                                            |
| Hs.224012.1.36 | chr20:10574618:10574118   | 10574370  | c | NM_000214 | 15 | CDS | 182    | JAG1     | jagged 1 (Alagille syndrome)                                                                                                     |

|                |                           |           |   |              |    |      |        |          |                                                                                                   |
|----------------|---------------------------|-----------|---|--------------|----|------|--------|----------|---------------------------------------------------------------------------------------------------|
| Hs.225129.1.43 | chr10:75240562:75238494   | 75240456  | c | NM_003635    | 2  | 5UTR | 8509   | NDST2    | N-deacetylase/N-sulfotransferase (heparan glucosaminyl) 2                                         |
| Hs.22543.1.21  | chr15:23150592:23136469   | 23150273  | c | NM_000462    | 9  | CDS  | 7337   | UBE3A    | ubiquitin protein ligase E3A (human papilloma virus E6-associated protein, Angelman syndrome)     |
| Hs.2258.1.8    | chr11:102147952:102146835 | 102147871 | c | NM_002425    | 9  | CDS  | 4319   | MMP10    | matrix metalloproteinase 10 (stromelysin 2)                                                       |
| Hs.225836.1.14 | chr6:153411798:153408569  | 153411546 | c | NM_019041    | 2  | CDS  | 54516  | MTRF1L   | mitochondrial translational release factor 1-like                                                 |
| Hs.227253.1.15 | chr3:101574139:101570670  | 101573541 | c | NM_014820    | 9  | CDS  | 9868   | TOMM70A  | translocase of outer mitochondrial membrane 70 homolog A (yeast)                                  |
| Hs.227489.1.14 | chr19:12830554:12836622   | 12830717  | c | NM_014975    | 12 | CDS  | 22983  | MAST1    | microtubule associated serine/threonine kinase 1                                                  |
| Hs.227489.1.15 | chr19:12830554:12836622   | 12830784  | c | NM_014975    | 12 | CDS  | 22983  | MAST1    | microtubule associated serine/threonine kinase 1                                                  |
| Hs.22785.1.13  | chrX:150808708:150801684  | 150808443 | c | NM_004961    | 3  | CDS  | 2564   | GABRE    | gamma-aminobutyric acid (GABA) A receptor, epsilon                                                |
| Hs.229335.1.9  | chr22:27862643:27887585   | 27863057  | c | NM_032045    | 9  | CDS  | 83999  | KREMEN1  | kringle containing transmembrane protein 1                                                        |
| Hs.22981.1.21  | chr18:32632409:32631012   | 32631979  | c | NM_015476    | 6  | CDS  | 25941  | C18orf10 | chromosome 18 open reading frame 10                                                               |
| Hs.23170.1.22  | chrX:48097437:48097627    | 48097568  | c | NM_012280    | 11 | CDS  | 24140  | FTSJ1    | FtsJ homolog 1 (E. coli)                                                                          |
| Hs.231829.1.6  | chr10:26548212:26552821   | 26548252  | c | NM_000818    | 4  | CDS  | 2572   | GAD2     | glutamate decarboxylase 2 (pancreatic islets and brain, 65kDa)                                    |
| Hs.232021.1.42 | chr6:111820771:111818077  | 111820591 | c | NM_002912    | 6  | CDS  | 5980   | REV3L    | REV3-like, catalytic subunit of DNA polymerase zeta (yeast)                                       |
| Hs.232021.1.44 | chr6:111833365:111820869  | 111833323 | c | NM_002912    | 5  | CDS  | 5980   | REV3L    | REV3-like, catalytic subunit of DNA polymerase zeta (yeast)                                       |
| Hs.232270.1.2  | chr17:9438364:9442275     | 9438528   | c | NM_145054    | 5  | CDS  | 146845 | wdr16    | hypothetical protein LOC146845                                                                    |
| Hs.232375.1.10 | chr11:107514979:107516001 | 107515094 | c | NM_000019    | 6  | CDS  | 38     | ACAT1    | acetyl-Coenzyme A acetyltransferase 1 (acetoacetyl Coenzyme A thiolase)                           |
| Hs.233160.1.10 | chr5:172682827:172677859  | 172682578 | c | NM_003714    | 3  | CDS  | 8614   | STC2     | stanniocalcin 2                                                                                   |
| Hs.233240.1.92 | chr2:238062374:238059821  | 238062275 | c | NM_004369    | 9  | CDS  | 1293   | COL6A3   | collagen, type VI, alpha 3                                                                        |
| Hs.233325.1.1  | chr6:26195724:26201325    | 26196035  | c | NM_139011    | 1  | CDS  | 3077   | HFE      | hemochromatosis                                                                                   |
| Hs.233363.1.4  | chr3:110117663:110109747  | 110117481 | c | NM_005459    | 3  | CDS  | 9626   | GUCA1C   | guanylate cyclase activator 1C                                                                    |
| Hs.233407.1.3  | chr10:118091704:118106881 | 118091735 | c | NM_198515    | 5  | CDS  | 374355 | C10orf96 | chromosome 10 open reading frame 96                                                               |
| Hs.233552.1.3  | chr7:39764692:39800437    | 39765757  | c | NM_003718    | 1  | CDS  | 8621   | CDC2L5   | cell division cycle 2-like 5 (cholinesterase-related cell division controller)                    |
| Hs.233552.1.9  | chr7:39810504:39812199    | 39810709  | c | NM_003718    | 3  | CDS  | 8621   | CDC2L5   | cell division cycle 2-like 5 (cholinesterase-related cell division controller)                    |
| Hs.23361.1.14  | chr11:34138028:34137510   | 34138022  | c | NM_145804    | 13 | CDS  | 25841  | ABTB2    | ankyrin repeat and BTB (POZ) domain containing 2                                                  |
| Hs.23367.1.3   | chr9:115766855:115746476  | 115766335 | c | NM_021208    | 1  | CDS  | 58483  | C9orf27  | chromosome 9 open reading frame 27                                                                |
| Hs.234569.1.18 | chr2:97813089:97814355    | 97813182  | c | NM_001079    | 13 | CDS  | 7535   | ZAP70    | zeta-chain (TCR) associated protein kinase 70kDa                                                  |
| Hs.234898.1.27 | chr12:108152682:108153539 | 108153103 | c | NM_001093    | 41 | CDS  | 32     | ACACB    | acetyl-Coenzyme A carboxylase beta                                                                |
| Hs.235116.1.25 | chr5:176796138:176800306  | 176796286 | c | NM_001004105 | 13 | CDS  | 2870   | GRK6     | G protein-coupled receptor kinase 6                                                               |
| Hs.235390.1.15 | chr19:63291866:63290584   | 63290817  | c | NM_023926    | 3  | CDS  | 65982  | ZNF447   | zinc finger protein 447                                                                           |
| Hs.236030.1.57 | chr12:54861532:54861153   | 54861311  | c | NM_003075    | 10 | CDS  | 6601   | SMARCC2  | SWI/SNF related, matrix associated, actin dependent regulator of chromatin, subfamily c, member 2 |
| Hs.236940.1.24 | chr18:12681357:12676450   | 12681232  | c | NM_024899    | 7  | CDS  | 79959  | C18orf9  | chromosome 18 open reading frame 9                                                                |
| Hs.236940.1.31 | chr18:12688977:12687408   | 12688945  | c | NM_024899    | 4  | CDS  | 79959  | C18orf9  | chromosome 18 open reading frame 9                                                                |
| Hs.237480.1.13 | chr3:113782864:113784207  | 113782959 | c | NM_017945    | 6  | CDS  | 55032  | SLC35A5  | solute carrier family 35, member A5                                                               |
| Hs.237642.1.13 | chr4:187497646:187501502  | 187497699 | c | NM_207352    | 7  | CDS  | 285440 | CYP4V2   | cytochrome P450, family 4, subfamily V, polypeptide 2                                             |
| Hs.237642.1.2  | chr4:187488341:187490802  | 187488971 | c | NM_207352    | 1  | CDS  | 285440 | CYP4V2   | cytochrome P450, family 4, subfamily V, polypeptide 2                                             |

|                |                           |           |   |           |    |      |        |           |                                                                     |
|----------------|---------------------------|-----------|---|-----------|----|------|--------|-----------|---------------------------------------------------------------------|
| Hs.237825.1.10 | chr4:57181486:57183764    | 57181602  | c | NM_006947 | 5  | CDS  | 6731   | SRP72     | signal recognition particle 72kDa                                   |
| Hs.237825.1.25 | chr4:57198663:57202450    | 57198739  | c | NM_006947 | 16 | CDS  | 6731   | SRP72     | signal recognition particle 72kDa                                   |
| Hs.237825.1.26 | chr4:57198663:57202450    | 57198777  | c | NM_006947 | 16 | CDS  | 6731   | SRP72     | signal recognition particle 72kDa                                   |
| Hs.239370.1.11 | chr9:136511288:136518985  | 136512125 | c | NM_015597 | 8  | CDS  | 26086  | GPSM1     | G-protein signalling modulator 1 (AGS3-like, <i>C. elegans</i> )    |
| Hs.239514.1.4  | chr17:52267620:52276378   | 52268826  | c | NM_003647 | 2  | CDS  | 8526   | DGKE      | diacylglycerol kinase, epsilon 64kDa                                |
| Hs.239631.1.13 | chr7:106444921:106438027  | 106444613 | c | NM_006348 | 21 | CDS  | 10466  | COG5      | component of oligomeric golgi complex 5                             |
| Hs.241575.1.3  | chr16:1342309:1351744     | 1342501   | c | NM_032520 | 3  | CDS  | 84572  | GNPTG     | N-acetylglucosamine-1-phosphate transferase, gamma subunit          |
| Hs.24309.1.6   | chr10:15143868:15146407   | 15144089  | c | NM_018324 | 5  | CDS  | 55301  | THEDC1    | thioesterase domain containing 1                                    |
| Hs.243564.1.10 | chr1:157467749:157464332  | 157466382 | c | NM_001778 | 2  | CDS  | 962    | CD48      | CD48 antigen (B-cell membrane protein)                              |
| Hs.243994.1.11 | chr11:664535:644052       | 664364    | c | NM_021008 | 10 | CDS  | 10522  | DEAF1     | deformed epidermal autoregulatory factor 1 ( <i>Drosophila</i> )    |
| Hs.24553.1.28  | chr15:72274695:72273317   | 72273781  | c | NM_022369 | 7  | CDS  | 64220  | STRA6     | stimulated by retinoic acid gene 6 homolog (mouse)                  |
| Hs.24598.1.32  | chr11:119852668:119853137 | 119852761 | c | NM_015313 | 34 | CDS  | 23365  | ARHGEF12  | Rho guanine nucleotide exchange factor (GEF) 12                     |
| Hs.24601.1.14  | chr22:44251755:44257645   | 44252039  | c | NM_001996 | 8  | CDS  | 2192   | FBLN1     | fibulin 1                                                           |
| Hs.246344.1.44 | chr9:121004104:121006774  | 121004184 | c | NM_007018 | 32 | CDS  | 11064  | CEP1      | centrosomal protein 1                                               |
| Hs.246344.1.51 | chr9:121011649:121013239  | 121011757 | c | NM_007018 | 37 | CDS  | 11064  | CEP1      | centrosomal protein 1                                               |
| Hs.24684.1.20  | chr5:90708193:90707187    | 90708123  | c | NM_020801 | 3  | CDS  | 57561  | ARRDC3    | arrestin domain containing 3                                        |
| Hs.247324.1.10 | chr1:171719210:171715645  | 171719028 | c | NM_022100 | 2  | CDS  | 63931  | MRPS14    | mitochondrial ribosomal protein S14                                 |
| Hs.248131.1.2  | chr5:178342516:178341462  | 178342414 | c | NM_000843 | 9  | CDS  | 2916   | GRM6      | glutamate receptor, metabotropic 6                                  |
| Hs.248139.1.2  | chr1:110858552:110856835  | 110857818 | c | BC043564  | 3  | CDS  | 3737   | KCNA2     | potassium voltage-gated channel, shaker-related subfamily, member 2 |
| Hs.248472.1.22 | chr16:31300719:31301289   | 31301000  | c | BC038237  | 30 | CDS  | 3687   | ITGAX     | integrin, alpha X (antigen CD11C (p150), alpha polypeptide)         |
| Hs.248815.1.6  | chr21:43143219:43136461   | 43142405  | c | NM_033661 | 11 | 3UTR | 10785  | WDR4      | WD repeat domain 4                                                  |
| Hs.249441.1.6  | chr11:9555387:9559654     | 9559594   | c | NM_003390 | 5  | CDS  | 7465   | WEE1      | WEE1 homolog ( <i>S. pombe</i> )                                    |
| Hs.24956.1.28  | chr14:104252239:104256176 | 104252708 | c | BC008756  | 11 | CDS  | 64423  | C14orf173 | chromosome 14 open reading frame 173                                |
| Hs.249591.1.20 | chr9:19347153:19347962    | 19347693  | c | NM_017925 | 20 | CDS  | 55667  | C9orf55   | chromosome 9 open reading frame 55                                  |
| Hs.24998.1.11  | chr19:13731087:13734112   | 13731087  | c | NM_030818 | 7  | CDS  | 81576  | MGC10471  | hypothetical protein MGC10471                                       |
| Hs.24998.1.13  | chr19:13731087:13734112   | 13731288  | c | NM_030818 | 7  | CDS  | 81576  | MGC10471  | hypothetical protein MGC10471                                       |
| Hs.24998.1.14  | chr19:13731087:13734112   | 13731441  | c | NM_030818 | 7  | CDS  | 81576  | MGC10471  | hypothetical protein MGC10471                                       |
| Hs.250472.1.5  | chr12:99152294:99148783   | 99152119  | c | NM_152317 | 4  | CDS  | 120863 | DEPDC4    | DEP domain containing 4                                             |
| Hs.250557.1.3  | chr16:1068458:1067714     | 1067723   | c | NM_182510 | 1  | 5UTR | 146336 | FLJ32252  | hypothetical protein FLJ32252                                       |
| Hs.250687.1.5  | chr3:143986581:143992558  | 143986827 | c | NM_003304 | 6  | CDS  | 7220   | TRPC1     | transient receptor potential cation channel, subfamily C, member 1  |
| Hs.250763.1.11 | chr1:147961500:147960467  | 147961166 | c | AK092700  | 1  | 5UTR | 29765  | TMOD4     | tropomodulin 4 (muscle)                                             |
| Hs.250821.1.7  | chr19:7033064:7033888     | 7033073   | c | NM_024341 | 7  | CDS  | 79230  | ZNF557    | zinc finger protein 557                                             |
| Hs.25094.1.2   | chr6:169969066:169962003  | 169967240 | c | NM_174910 | 1  | CDS  | 6991   | TCTE3     | t-complex-associated-testis-expressed 3                             |
| Hs.252549.1.7  | chr20:57005088:57004210   | 57005037  | c | NM_001336 | 5  | CDS  | 1522   | CTS2      | cathepsin Z                                                         |
| Hs.253726.1.15 | chr14:96067677:96068420   | 96067818  | c | NM_032632 | 7  | CDS  | 10914  | PAPOLA    | poly(A) polymerase alpha                                            |
| Hs.254054.1.1  | chr16:2789572:2794390     | 2789947   | c | NM_183379 | 3  | CDS  | 360226 | TESSP1    | testis serine protease 1                                            |
| Hs.254699.1.4  | chr5:36001244:35998811    | 36000955  | c | BC035012  | 5  | CDS  | 133688 | UGT3A1    | UDP glycosyltransferase 3 family, polypeptide A1                    |
| Hs.255491.1.10 | chr3:142488994:142493807  | 142489240 | c | NM_152282 | 7  | CDS  | 92370  | ACPL2     | acid phosphatase-like 2                                             |
| Hs.256398.1.6  | chr7:87405402:87406832    | 87406764  | c | NM_004194 | 11 | CDS  | 53616  | ADAM22    | a disintegrin and metalloproteinase domain 22                       |
| Hs.256667.1.5  | chr17:45538433:45539156   | 45538619  | c | NM_002611 | 4  | CDS  | 5164   | PDK2      | pyruvate dehydrogenase kinase, isoenzyme 2                          |
| Hs.256667.1.6  | chr17:45538433:45539156   | 45538734  | c | NM_002611 | 4  | CDS  | 5164   | PDK2      | pyruvate dehydrogenase kinase, isoenzyme 2                          |
| Hs.258209.1.14 | chr12:68475392:68492824   | 68476691  | c | NM_175626 | 6  | CDS  | 117177 | RAB3IP    | RAB3A interacting protein (rabin3)                                  |
| Hs.258209.1.8  | chr12:68464863:68474483   | 68465063  | c | NM_022456 | 4  | CDS  | 117177 | RAB3IP    | RAB3A interacting protein (rabin3)                                  |
| Hs.258314.1.12 | chr2:28159939:28180242    | 28160000  | c | NM_004899 | 5  | CDS  | 9577   | BRE       | brain and reproductive organ-expressed (TNFRSF1A modulator)         |

|                |                           |           |   |              |    |      |        |           |                                                                                        |
|----------------|---------------------------|-----------|---|--------------|----|------|--------|-----------|----------------------------------------------------------------------------------------|
| Hs.258855.1.20 | chr11:117858018:117858346 | 117858198 | c | NM_005933    | 7  | CDS  | 4297   | MLL       | myeloid/lymphoid or mixed-lineage leukemia (trithorax homolog, Drosophila)             |
| Hs.260041.1.19 | chr7:93825442:93826312    | 93825530  | c | NM_022900    | 15 | CDS  | 64921  | CAS1      | O-acetyltransferase                                                                    |
| Hs.260555.1.13 | chr14:73593715:73601143   | 73593915  | c | NM_025057    | 4  | CDS  | 80127  | C14orf45  | chromosome 14 open reading frame 45                                                    |
| Hs.260720.1.17 | chr10:69241287:69235552   | 69240984  | c | NM_021800    | 3  | CDS  | 56521  | DNAJC12   | DnaJ (Hsp40) homolog, subfamily C, member 12                                           |
| Hs.260720.1.19 | chr10:69241287:69235552   | 69241093  | c | NM_021800    | 3  | CDS  | 56521  | DNAJC12   | DnaJ (Hsp40) homolog, subfamily C, member 12                                           |
| Hs.262150.1.12 | chr19:40519085:40520497   | 40519404  | c | NM_001771    | 3  | CDS  | 933    | CD22      | CD22 antigen                                                                           |
| Hs.26225.1.13  | chr5:170165436:170168181  | 170165480 | c | NM_014211    | 7  | CDS  | 2568   | GABRP     | gamma-aminobutyric acid (GABA) A receptor, pi                                          |
| Hs.262960.1.6  | chr13:37164135:37146505   | 37164085  | c | NM_016179    | 4  | CDS  | 7223   | TRPC4     | transient receptor potential cation channel, subfamily C, member 4                     |
| Hs.26403.1.1   | chr14:76857660:76858642   | 76858325  | c | NM_001513    | 1  | 5UTR | 2954   | GSTZ1     | glutathione transferase zeta 1 (maleylacetoacetate isomerase)                          |
| Hs.264208.1.10 | chr2:55674551:55676269    | 55674702  | c | NM_080667    | 7  | CDS  | 112942 | MGC15407  | similar to RIKEN cDNA 4931428D14 gene                                                  |
| Hs.26613.1.19  | chr12:49141398:49142631   | 49141537  | c | NM_052879    | 11 | CDS  | 113251 | LARP4     | La ribonucleoprotein domain family, member 4                                           |
| Hs.26630.1.52  | chr16:2313524:2309843     | 2313347   | c | NM_001089    | 6  | CDS  | 21     | ABCA3     | ATP-binding cassette, sub-family A (ABC1), member 3                                    |
| Hs.266826.1.10 | chr3:139430551:139436573  | 139430591 | c | NM_014154    | 7  | CDS  | 25852  | ARMC8     | armadillo repeat containing 8                                                          |
| Hs.267038.1.6  | chrX:84343353:84340578    | 84343266  | c | NM_024921    | 16 | CDS  | 79983  | POF1B     | premature ovarian failure, 1B                                                          |
| Hs.26704.1.58  | chr15:20551685:20554316   | 20551693  | c | NM_014608    | 30 | CDS  | 23191  | CYFIP1    | cytoplasmic FMR1 interacting protein 1                                                 |
| Hs.26704.1.59  | chr15:20551685:20554316   | 20551722  | c | NM_014608    | 30 | CDS  | 23191  | CYFIP1    | cytoplasmic FMR1 interacting protein 1                                                 |
| Hs.26704.1.60  | chr15:20551685:20554316   | 20551872  | c | NM_014608    | 30 | CDS  | 23191  | CYFIP1    | cytoplasmic FMR1 interacting protein 1                                                 |
| Hs.268107.1.5  | chr4:91206298:91229933    | 91206333  | c | AK125557     | 6  | CDS  | 22915  | MMRN1     | multimerin 1                                                                           |
| Hs.26814.1.18  | chr8:141332057:141300865  | 141331855 | c | NM_031466    | 16 | CDS  | 83696  | NIBP      | NIK and IKK(beta) binding protein                                                      |
| Hs.268326.1.2  | chr12:9724897:9731764     | 9724947   | c | NM_001004419 | 2  | CDS  | 29121  | CLEC2D    | C-type lectin superfamily 2, member D                                                  |
| Hs.26837.1.26  | chr1:114676099:114664981  | 114676049 | c | NM_015906    | 11 | CDS  | 51592  | TRIM33    | tripartite motif-containing 33                                                         |
| Hs.268573.1.17 | chr22:22706253:22704066   | 22705699  | c | NM_000853    | 2  | CDS  | 2952   | GSTT1     | glutathione S-transferase theta 1                                                      |
| Hs.268675.1.18 | chr15:98048157:98064456   | 98048292  | c | BC013437     | 8  | CDS  | 4205   | MEF2A     | MADS box transcription enhancer factor 2, polypeptide A (myocyte enhancer factor 2A)   |
| Hs.268869.1.21 | chr8:67528947:67531605    | 67529239  | c | NM_144650    | 9  | CDS  | 137872 | ADHFE1    | alcohol dehydrogenase, iron containing, 1                                              |
| Hs.269099.1.5  | chr1:78125158:78124283    | 78124724  | c | BC017247     | 20 | 3UTR | 8880   | FUBP1     | far upstream element (FUSE) binding protein 1                                          |
| Hs.269109.1.11 | chr7:80022864:80019275    | 80022279  | c | NM_006379    | 17 | CDS  | 10512  | SEMA3C    | sema domain, immunoglobulin domain (Ig), short basic domain, secreted, (semaphorin) 3C |
| Hs.269121.1.2  | chr4:126766367:126768660  | 126766599 | c | NM_024582    | 14 | CDS  | 79633  | FAT4      | FAT tumor suppressor homolog 4 (Drosophila)                                            |
| Hs.269471.1.9  | chr20:23308081:23306124   | 23307428  | c | NM_022080    | 10 | CDS  | 63908  | NAPB      | N-ethylmaleimide-sensitive factor attachment protein, beta                             |
| Hs.269665.1.28 | chr4:56600875:56603810    | 56601269  | c | NM_018261    | 15 | CDS  | 55763  | SEC3L1    | SEC3-like 1 (S. cerevisiae)                                                            |
| Hs.269977.1.11 | chr2:98311712:98325298    | 98311786  | c | NM_144992    | 20 | CDS  | 200403 | MGC26733  | hypothetical protein MGC26733                                                          |
| Hs.270043.1.42 | chr8:126144945:126142619  | 126144793 | c | NM_014846    | 10 | CDS  | 9897   | KIAA0196  | KIAA0196                                                                               |
| Hs.270043.1.61 | chr8:126164536:126163892  | 126164310 | c | NM_014846    | 2  | CDS  | 9897   | KIAA0196  | KIAA0196                                                                               |
| Hs.27021.1.5   | chr5:96526510:96524686    | 96526419  | c | NM_018343    | 9  | CDS  | 55781  | RIOK2     | RIO kinase 2 (yeast)                                                                   |
| Hs.270492.1.67 | chr7:151355255:151342162  | 151354785 | c | NM_021230    | 9  | CDS  | 58508  | MLL3      | myeloid/lymphoid or mixed-lineage leukemia 3                                           |
| Hs.270492.1.83 | chr7:151397748:151387449  | 151397435 | c | NM_170606    | 9  | CDS  | 58508  | MLL3      | myeloid/lymphoid or mixed-lineage leukemia 3                                           |
| Hs.270775.1.1  | chr1:180216784:180218479  | 180216904 | c | NM_014837    | 3  | CDS  | 9887   | C1orf16   | chromosome 1 open reading frame 16                                                     |
| Hs.270851.1.23 | chr4:146438259:146434754  | 146437894 | c | NM_199324    | 6  | CDS  | 54726  | HSN1      | HIV-1 induced protein HIN-1                                                            |
| Hs.270869.1.12 | chr14:73434719:73440415   | 73434974  | c | NM_021188    | 5  | CDS  | 57862  | ZNF410    | zinc finger protein 410                                                                |
| Hs.270962.1.2  | chr7:73972981:73981342    | 73973141  | c | NM_001003795 | 3  | CDS  | 389524 | GTF2IRD2B | GTF2IRD2 beta                                                                          |
| Hs.270962.2.10 | chr7:73692578:73684233    | 73692417  | c | BC047706     | 3  | CDS  | NA     | NA        | NA                                                                                     |
| Hs.271224.1.11 | chr3:49016698:49017297    | 49017032  | c | NM_017732    | 5  | CDS  | 54681  | PH-4      | hypoxia-inducible factor prolyl 4-hydroxylase                                          |
| Hs.271264.1.25 | chr6:53478148:53473271    | 53478018  | c | NM_001498    | 12 | CDS  | 2729   | GCLC      | glutamate-cysteine ligase, catalytic subunit                                           |
| Hs.271272.1.5  | chr12:106545519:106547917 | 106547154 | c | NM_001017523 | 13 | CDS  | 121551 | BTBD11    | BTB (POZ) domain containing 11                                                         |
| Hs.271614.1.9  | chr14:23679937:23678664   | 23679928  | c | NM_016049    | 3  | CDS  | 51016  | C14orf122 | chromosome 14 open reading frame 122                                                   |

|                |                           |           |   |              |    |      |        |          |                                                                            |
|----------------|---------------------------|-----------|---|--------------|----|------|--------|----------|----------------------------------------------------------------------------|
| Hs.2717.2.3    | chr8:7755656:7758432      | 7755875   | c | NM_058200    | 3  | CDS  | 10407  | SPAG11   | sperm associated antigen 11                                                |
| Hs.27182.1.14  | chr9:26897831:26896075    | 26897805  | c | NM_004253    | 12 | CDS  | 9373   | PLAA     | phospholipase A2-activating protein                                        |
| Hs.271876.1.1  | chr8:79740955:79750576    | 79742910  | c | NM_016010    | 1  | CDS  | 51101  | CGI-62   | CGI-62 protein                                                             |
| Hs.271903.1.4  | chr2:205376512:205655380  | 205376781 | c | AB073472     | 2  | CDS  | 117583 | ALS2CR19 | amyotrophic lateral sclerosis 2 (juvenile) chromosome region, candidate 19 |
| Hs.272168.1.10 | chr20:42562312:42558411   | 42562039  | c | NM_198941    | 10 | 3UTR | 10955  | TDE1     | tumor differentially expressed 1                                           |
| Hs.272168.1.12 | chr20:42562312:42558411   | 42562242  | c | NM_198941    | 10 | 3UTR | 10955  | TDE1     | tumor differentially expressed 1                                           |
| Hs.272168.1.9  | chr20:42562312:42558411   | 42561945  | c | NM_198941    | 10 | 3UTR | 10955  | TDE1     | tumor differentially expressed 1                                           |
| Hs.272225.1.6  | chr9:74606468:74606279    | 74606436  | c | NM_017662    | 26 | CDS  | 140803 | TRPM6    | transient receptor potential cation channel, subfamily M, member 6         |
| Hs.272246.1.7  | chr5:86570387:86549924    | 86569891  | c | NM_018382    | 1  | CDS  | 55338  | FLJ11292 | hypothetical protein FLJ11292                                              |
| Hs.272251.1.2  | chr4:38887222:38905288    | 38887507  | c | NM_199039    | 1  | CDS  | 51088  | KLHL5    | kelch-like 5 (Drosophila)                                                  |
| Hs.272630.1.17 | chr14:66876909:66875233   | 66876907  | c | NM_015994    | 8  | CDS  | 51382  | ATP6V1D  | ATPase, H+ transporting, lysosomal 34kDa, V1 subunit D                     |
| Hs.272848.1.17 | chr17:38078719:38077937   | 38078271  | c | NM_024927    | 6  | CDS  | 79990  | FLJ21019 | hypothetical protein FLJ21019                                              |
| Hs.273397.1.51 | chr12:55012863:55008693   | 55012682  | c | NM_014871    | 2  | CDS  | 9924   | USP52    | ubiquitin specific protease 52                                             |
| Hs.274128.1.15 | chr7:6632636:6627717      | 6632470   | c | NM_198097    | 7  | CDS  | 221960 | C7orf28B | chromosome 7 open reading frame 28B                                        |
| Hs.274128.1.18 | chr7:6637325:6637038      | 6637190   | c | NM_198097    | 3  | CDS  | 221960 | C7orf28B | chromosome 7 open reading frame 28B                                        |
| Hs.274295.1.7  | chr6:30232694:30231516    | 30232475  | c | NM_006778    | 5  | CDS  | 10107  | TRIM10   | tripartite motif-containing 10                                             |
| Hs.274329.1.10 | chr7:86619200:86615652    | 86618743  | c | AB007457     | 1  | CDS  | 11257  | TP53AP1  | TP53 activated protein 1                                                   |
| Hs.274329.1.9  | chr7:86619200:86615652    | 86616406  | c | AB007457     | 1  | CDS  | 11257  | TP53AP1  | TP53 activated protein 1                                                   |
| Hs.274337.1.23 | chr14:44649771:44651270   | 44649826  | c | NM_017922    | 11 | CDS  | 55015  | PRPF39   | PRPF39 pre-mRNA processing factor 39 homolog (yeast)                       |
| Hs.274531.1.3  | chr5:54654050:54655716    | 54654352  | c | NM_015360    | 2  | CDS  | 23517  | SKIV2L2  | superkiller viralicidic activity 2-like 2 (S. cerevisiae)                  |
| Hs.274873.1.24 | chr11:3004481:2998139     | 3004227   | c | NM_001014437 | 10 | CDS  | 833    | CARS     | cysteinyI-tRNA synthetase                                                  |
| Hs.274959.1.8  | chr18:617530:623297       | 617565    | c | NM_014410    | 5  | CDS  | 27098  | CLUL1    | clusterin-like 1 (retinal)                                                 |
| Hs.275711.1.16 | chr22:44936431:44948207   | 44938879  | c | NM_001001928 | 6  | CDS  | 5465   | PPARA    | peroxisome proliferative activated receptor, alpha                         |
| Hs.276878.1.34 | chr16:55430483:55430933   | 55430629  | c | NM_014669    | 18 | CDS  | 9688   | NUP93    | nucleoporin 93kDa                                                          |
| Hs.276905.1.15 | chr10:27496210:27498878   | 27496476  | c | NM_032844    | 7  | CDS  | 84930  | MASTL    | microtubule associated serine/threonine kinase-like                        |
| Hs.27695.1.14  | chrX:10247472:10237584    | 10247015  | c | NM_000381    | 7  | CDS  | 4281   | MID1     | midline 1 (Opitz/BBB syndrome)                                             |
| Hs.277026.1.6  | chr9:35650090:35649171    | 35650006  | c | NM_032818    | 7  | 3UTR | 84904  | C9orf100 | chromosome 9 open reading frame 100                                        |
| Hs.277154.1.22 | chr5:74068376:74064680    | 74068250  | c | NM_032380    | 15 | CDS  | 84340  | GFM2     | G elongation factor, mitochondrial 2                                       |
| Hs.277624.1.8  | chr17:3859646:3858998     | 3859352   | c | NM_015113    | 53 | CDS  | 23140  | ZZEF1    | zinc finger, ZZ-type with EF-hand domain 1                                 |
| Hs.277677.1.27 | chr2:240677959:240674268  | 240677814 | c | NM_004544    | 4  | CDS  | 4705   | NDUFA10  | NADH dehydrogenase (ubiquinone) 1 alpha subcomplex, 10, 42kDa              |
| Hs.278815.1.3  | chr14:93575181:93580069   | 93575510  | c | NM_023112    | 3  | CDS  | 78990  | OTUB2    | OTU domain, ubiquitin aldehyde binding 2                                   |
| Hs.278945.1.16 | chr4:25043058:25046919    | 25044006  | c | AY629351     | 12 | CDS  | 29063  | ZCCHC4   | zinc finger, CCHC domain containing 4                                      |
| Hs.278960.1.3  | chr3:139332388:139326419  | 139332207 | c | NM_016161    | 2  | CDS  | 51146  | A4GNT    | alpha-1,4-N-acetylglucosaminyltransferase                                  |
| Hs.278962.1.10 | chr5:33999552:33990367    | 33999381  | c | NM_001012509 | 3  | CDS  | 51151  | MATP     | membrane associated transporter                                            |
| Hs.278962.1.20 | chr5:34020060:34018275    | 34019793  | c | NM_001012509 | 1  | CDS  | 51151  | MATP     | membrane associated transporter                                            |
| Hs.278962.1.3  | chr5:33983024:33980735    | 33981728  | c | NM_016180    | 6  | CDS  | 51151  | MATP     | membrane associated transporter                                            |
| Hs.278962.1.7  | chr5:33987415:33983237    | 33987267  | c | NM_001012509 | 5  | CDS  | 51151  | MATP     | membrane associated transporter                                            |
| Hs.279522.1.1  | chr9:99668639:99669877    | 99668802  | c | NM_173200    | 1  | CDS  | 8013   | NR4A3    | nuclear receptor subfamily 4, group A, member 3                            |
| Hs.279562.1.13 | chr20:62329769:62333960   | 62329899  | c | NM_004535    | 18 | CDS  | 4661   | MYT1     | myelin transcription factor 1                                              |
| Hs.279652.1.19 | chr19:10230362:10231292   | 10230647  | c | NM_015956    | 8  | CDS  | 51073  | MRPL4    | mitochondrial ribosomal protein L4                                         |
| Hs.279652.1.22 | chr19:10230362:10231292   | 10230809  | c | NM_015956    | 8  | CDS  | 51073  | MRPL4    | mitochondrial ribosomal protein L4                                         |
| Hs.279806.1.20 | chr17:59929018:59928804   | 59928855  | c | NM_004396    | 9  | CDS  | 1655   | DDX5     | DEAD (Asp-Glu-Ala-Asp) box polypeptide 5                                   |
| Hs.279806.1.37 | chr17:59931256:59930899   | 59931189  | c | NM_004396    | 2  | CDS  | 1655   | DDX5     | DEAD (Asp-Glu-Ala-Asp) box polypeptide 5                                   |
| Hs.279913.1.11 | chr12:119481518:119480447 | 119481326 | c | NM_198201    | 2  | CDS  | 51367  | POP5     | processing of precursor 5, ribonuclease P/MRP subunit (S. cerevisiae)      |

|                |                           |           |   |           |    |      |        |              |                                                                                 |
|----------------|---------------------------|-----------|---|-----------|----|------|--------|--------------|---------------------------------------------------------------------------------|
| Hs.280388.1.17 | chr2:110279471:110278088  | 110279282 | c | NM_000272 | 8  | CDS  | 4867   | NPHP1        | nephronophthisis 1 (juvenile)                                                   |
| Hs.280388.1.21 | chr2:110293374:110284951  | 110292993 | c | NM_000272 | 4  | CDS  | 4867   | NPHP1        | nephronophthisis 1 (juvenile)                                                   |
| Hs.280881.1.2  | chr14:49868729:49866650   | 49868394  | c | NM_004196 | 8  | CDS  | 8814   | CDKL1        | cyclin-dependent kinase-like 1 (CDC2-related kinase)                            |
| Hs.280951.1.24 | chr16:73500306:73495500   | 73500132  | c | NM_030581 | 17 | CDS  | 79726  | WDR59        | WD repeat domain 59                                                             |
| Hs.280951.1.30 | chr16:73503596:73501317   | 73503516  | c | NM_030581 | 14 | CDS  | 79726  | WDR59        | WD repeat domain 59                                                             |
| Hs.282326.1.8  | chr21:34815666:34812425   | 34815239  | c | NM_004414 | 3  | CDS  | 1827   | DSCR1        | Down syndrome critical region gene 1                                            |
| Hs.282417.1.40 | chr14:50460436:50457536   | 50459719  | c | NM_002863 | 5  | CDS  | 5836   | PYGL         | phosphorylase, glycogen; liver (Hers disease, glycogen storage disease type VI) |
| Hs.282417.1.44 | chr14:50460436:50457536   | 50460284  | c | NM_002863 | 5  | CDS  | 5836   | PYGL         | phosphorylase, glycogen; liver (Hers disease, glycogen storage disease type VI) |
| Hs.282624.1.7  | chr10:96692089:96697525   | 96692829  | c | NM_000771 | 3  | CDS  | 1559   | CYP2C9       | cytochrome P450, family 2, subfamily C, polypeptide 9                           |
| Hs.282624.1.8  | chr10:96692089:96697525   | 96693013  | c | NM_000771 | 3  | CDS  | 1559   | CYP2C9       | cytochrome P450, family 2, subfamily C, polypeptide 9                           |
| Hs.282678.1.17 | chr17:57387524:57385257   | 57387050  | c | NM_005121 | 26 | CDS  | 9969   | THRAP1       | thyroid hormone receptor associated protein 1                                   |
| Hs.282678.1.23 | chr17:57393009:57388625   | 57392967  | c | NM_005121 | 23 | CDS  | 9969   | THRAP1       | thyroid hormone receptor associated protein 1                                   |
| Hs.282678.1.46 | chr17:57442692:57427509   | 57442571  | c | NM_005121 | 9  | CDS  | 9969   | THRAP1       | thyroid hormone receptor associated protein 1                                   |
| Hs.282855.1.4  | chr15:54173122:54167000   | 54172035  | c | NM_022841 | 9  | CDS  | 64864  | RFXDC2       | regulatory factor X domain containing 2                                         |
| Hs.282901.1.35 | chr20:33783276:33780864   | 33782696  | c | NM_004902 | 4  | CDS  | 9584   | RNPC2        | RNA-binding region (RNP1, RRM) containing 2                                     |
| Hs.282901.1.36 | chr20:33783276:33780864   | 33782823  | c | NM_004902 | 4  | CDS  | 9584   | RNPC2        | RNA-binding region (RNP1, RRM) containing 2                                     |
| Hs.282938.1.10 | chr2:227834736:227830460  | 227834583 | c | NM_000092 | 3  | CDS  | 1286   | COL4A4       | collagen, type IV, alpha 4                                                      |
| Hs.282938.1.8  | chr2:227752750:227750465  | 227752491 | c | NM_000092 | 26 | CDS  | 1286   | COL4A4       | collagen, type IV, alpha 4                                                      |
| Hs.283022.1.8  | chr6:41356676:41351947    | 41355255  | c | NM_018643 | 3  | CDS  | 54210  | TREM1        | triggering receptor expressed on myeloid cells 1                                |
| Hs.283369.1.4  | chr7:142139460:142129576  | 142138727 | c | NM_019841 | 8  | CDS  | 56302  | TRPV5        | transient receptor potential cation channel, subfamily V, member 5              |
| Hs.283551.1.3  | chr3:185337227:185338109  | 185337463 | c | NM_003907 | 2  | CDS  | 8893   | EIF2B5       | eukaryotic translation initiation factor 2B, subunit 5 epsilon, 82kDa           |
| Hs.283613.1.5  | chr1:22661006:22665124    | 22661420  | c | NM_020526 | 5  | CDS  | 2046   | EPHA8        | EPH receptor A8                                                                 |
| Hs.283652.1.5  | chr10:1078571:1077445     | 1078495   | c | NM_004508 | 4  | CDS  | 3422   | IDI1         | isopentenyl-diphosphate delta isomerase 1                                       |
| Hs.284157.1.1  | chr14:67078464:67092294   | 67078615  | c | NM_020715 | 2  | CDS  | 57475  | PLEKHH1      | pleckstrin homology domain containing, family H (with MyTH4 domain) member 1    |
| Hs.284800.1.5  | chr2:152552552:152551258  | 152552260 | c | NM_000726 | 8  | CDS  | 785    | CACNB4       | calcium channel, voltage-dependent, beta 4 subunit                              |
| Hs.285317.1.10 | chr4:8588145:8590881      | 8588357   | c | NM_152544 | 5  | CDS  | 152992 | FLJ35725     | hypothetical protein FLJ35725                                                   |
| Hs.285724.1.16 | chr7:20211858:20214583    | 20211925  | c | NM_002214 | 9  | CDS  | 3696   | ITGB8        | integrin, beta 8                                                                |
| Hs.285782.1.3  | chr2:77657098:76887698    | 77656022  | c | AY358324  | 3  | CDS  | 80059  | LRRTM4       | leucine rich repeat transmembrane neuronal 4                                    |
| Hs.287379.1.11 | chr10:49686010:49688580   | 49686270  | c | AK093607  | 5  | CDS  | 57705  | WDFY4        | WDFY family member 4                                                            |
| Hs.287471.1.16 | chr1:150997868:150993198  | 150997768 | c | NM_015449 | 5  | CDS  | 25912  | C1orf43      | chromosome 1 open reading frame 43                                              |
| Hs.287537.1.13 | chr10:125770761:125761987 | 125770314 | c | NM_015892 | 5  | CDS  | 51363  | GALNAC4S-6ST | B cell RAG associated protein                                                   |
| Hs.287537.1.14 | chr10:125770761:125761987 | 125770588 | c | NM_015892 | 5  | CDS  | 51363  | GALNAC4S-6ST | B cell RAG associated protein                                                   |
| Hs.28780.1.5   | chrX:134208283:134208554  | 134208467 | c | BC065938  | 3  | UTR  | 203523 | ZNF449       | zinc finger protein 449                                                         |
| Hs.287827.1.14 | chr7:86726910:86725762    | 86726346  | c | NM_000443 | 10 | CDS  | 5244   | ABCB4        | ATP-binding cassette, sub-family B (MDR/TAP), member 4                          |
| Hs.288178.1.22 | chr1:189785486:189792437  | 189785626 | c | AY205315  | 9  | CDS  | 6738   | TROVE2       | TROVE domain family, member 2                                                   |
| Hs.288178.1.24 | chr1:189785828:189792437  | 189786048 | c | AY205314  | 10 | 3UTR | 6738   | TROVE2       | TROVE domain family, member 2                                                   |
| Hs.288178.1.26 | chr1:189785828:189792437  | 189786772 | c | AY205314  | 10 | 3UTR | 6738   | TROVE2       | TROVE domain family, member 2                                                   |
| Hs.288229.1.11 | chr9:127505187:127507079  | 127505555 | c | NM_003165 | 7  | CDS  | 6812   | STXBP1       | syntaxin binding protein 1                                                      |
| Hs.288715.1.15 | chr12:87032887:87027464   | 87032341  | c | NM_025114 | 6  | CDS  | 80184  | Cep290       | centrosome protein cep290                                                       |
| Hs.288715.1.2  | chr12:86990014:86989078   | 86989842  | c | NM_025114 | 28 | CDS  | 80184  | Cep290       | centrosome protein cep290                                                       |
| Hs.288927.1.10 | chr10:105917368:105916467 | 105917333 | c | NM_025145 | 22 | CDS  | 80217  | C10orf79     | chromosome 10 open reading frame 79                                             |
| Hs.288927.1.17 | chr10:105953419:105947787 | 105953178 | c | NM_025145 | 8  | CDS  | 80217  | C10orf79     | chromosome 10 open reading frame 79                                             |
| Hs.288959.1.12 | chr17:45894946:45895515   | 45895401  | c | NM_025149 | 6  | CDS  | 80221  | FLJ20920     | hypothetical protein FLJ20920                                                   |

|                |                           |           |   |              |    |      |        |           |                                                                         |
|----------------|---------------------------|-----------|---|--------------|----|------|--------|-----------|-------------------------------------------------------------------------|
| Hs.289319.1.10 | chr19:45273882:45270727   | 45273870  | c | AK131328     | 7  | CDS  | 284323 | LOC284323 | hypothetical protein LOC284323                                          |
| Hs.289347.1.14 | chr1:12574816:12573707    | 12574397  | c | NM_004753    | 2  | CDS  | 9249   | DHRS3     | dehydrogenase/reductase (SDR family) member 3                           |
| Hs.289795.1.9  | chr11:30473418:30395757   | 30473260  | c | NM_001584    | 3  | CDS  | 744    | C11orf8   | chromosome 11 open reading frame 8                                      |
| Hs.289828.1.3  | chr10:5960065:5944661     | 5960058   | c | NM_019046    | 7  | 3UTR | 54522  | ANKRD16   | ankyrin repeat domain 16                                                |
| Hs.289828.1.7  | chr10:5964974:5962346     | 5964672   | c | NM_001009941 | 5  | CDS  | 54522  | ANKRD16   | ankyrin repeat domain 16                                                |
| Hs.290243.1.1  | chr10:103995529:104008675 | 103997781 | c | NM_004193    | 1  | 5UTR | 8729   | GBF1      | golgi-specific brefeldin A resistance factor 1                          |
| Hs.291000.1.8  | chr4:89543331:89541058    | 89543081  | c | NM_152542    | 6  | CDS  | 152926 | PPM1K     | protein phosphatase 1K (PP2C domain containing)                         |
| Hs.29106.1.13  | chr6:293842:295821        | 295701    | c | NM_020185    | 7  | CDS  | 56940  | DUSP22    | dual specificity phosphatase 22                                         |
| Hs.291212.1.6  | chr5:77024846:77023080    | 77024846  | c | NM_004607    | 3  | CDS  | 6902   | TBCA      | tubulin-specific chaperone a                                            |
| Hs.292072.1.21 | chr19:16374131:16367279   | 16372444  | c | NM_021235    | 16 | CDS  | 58513  | EPS15L1   | epidermal growth factor receptor pathway substrate 15-like 1            |
| Hs.292072.1.53 | chr19:16412672:16409677   | 16412464  | c | NM_021235    | 4  | CDS  | 58513  | EPS15L1   | epidermal growth factor receptor pathway substrate 15-like 1            |
| Hs.292072.1.54 | chr19:16412672:16409677   | 16412503  | c | NM_021235    | 4  | CDS  | 58513  | EPS15L1   | epidermal growth factor receptor pathway substrate 15-like 1            |
| Hs.292097.1.11 | chr10:94665651:94669718   | 94665767  | c | NM_001013848 | 7  | CDS  | 54536  | SEC15L1   | SEC15-like 1 (S. cerevisiae)                                            |
| Hs.292265.1.28 | chr10:285029:288287       | 285201    | c | NM_006624    | 14 | CDS  | 10771  | ZMYND11   | zinc finger, MYND domain containing 11                                  |
| Hs.292336.1.3  | chr19:57212181:57208318   | 57208389  | c | BC004930     | 5  | CDS  | 80110  | ZNF614    | zinc finger protein 614                                                 |
| Hs.292449.1.6  | chr1:154461457:154459632  | 154461184 | c | AF416905     | 15 | 3UTR | 115352 | FCRL3     | Fc receptor-like 3                                                      |
| Hs.292464.1.13 | chr8:104406903:104409671  | 104407339 | c | NM_003506    | 4  | CDS  | 8323   | FZD6      | frizzled homolog 6 (Drosophila)                                         |
| Hs.292464.1.20 | chr8:104411470:104412744  | 104411555 | c | NM_003506    | 6  | CDS  | 8323   | FZD6      | frizzled homolog 6 (Drosophila)                                         |
| Hs.292509.1.10 | chr2:114191559:114189003  | 114191117 | c | NM_025181    | 15 | 3UTR | 80255  | SLC35F5   | solute carrier family 35, member F5                                     |
| Hs.292509.1.24 | chr2:114208392:114205456  | 114207708 | c | NM_025181    | 9  | CDS  | 80255  | SLC35F5   | solute carrier family 35, member F5                                     |
| Hs.292509.1.25 | chr2:114216498:114209666  | 114215691 | c | NM_025181    | 7  | CDS  | 80255  | SLC35F5   | solute carrier family 35, member F5                                     |
| Hs.292575.1.11 | chr10:38444225:38446323   | 38444627  | c | NM_001007094 | 7  | CDS  | 7587   | ZNF37A    | zinc finger protein 37a (KOX 21)                                        |
| Hs.292590.1.8  | chr13:50724339:50752586   | 50725719  | c | NM_145019    | 4  | CDS  | 220108 | FLJ30707  | hypothetical protein FLJ30707                                           |
| Hs.292599.1.1  | chrX:119282527:119286451  | 119282814 | c | AF158383     | 2  | CDS  | 23439  | ATP1B4    | ATPase, (Na+)/K+ transporting, beta 4 polypeptide                       |
| Hs.292925.1.13 | chr2:55430462:55429952    | 55430462  | c | NM_018084    | 31 | 3UTR | 55704  | KIAA1212  | KIAA1212                                                                |
| Hs.292925.1.14 | chr2:55434383:55430563    | 55432960  | c | NM_018084    | 30 | CDS  | 55704  | KIAA1212  | KIAA1212                                                                |
| Hs.292925.1.41 | chr2:55467080:55461480    | 55467079  | c | NM_018084    | 17 | CDS  | 55704  | KIAA1212  | KIAA1212                                                                |
| Hs.292986.1.31 | chr4:107527005:107526049  | 107526664 | c | NM_033115    | 7  | CDS  | 93627  | MGC16169  | hypothetical protein MGC16169                                           |
| Hs.293077.1.19 | chr12:100622651:100625146 | 100623285 | c | NM_020244    | 8  | CDS  | 56994  | CHPT1     | choline phosphotransferase 1                                            |
| Hs.293274.1.10 | chr18:10462059:10475458   | 10462116  | c | NM_153000    | 3  | CDS  | 147495 | APCDD1    | adenomatosis polyposis coli down-regulated 1                            |
| Hs.295626.1.5  | chr19:14640613:14635353   | 14640432  | c | NM_032571    | 2  | CDS  | 84658  | EMR3      | egf-like module containing, mucin-like, hormone receptor-like 3         |
| Hs.295732.1.4  | chr12:100182756:100185205 | 100183044 | c | NM_014503    | 5  | CDS  | 27340  | DRIM      | down-regulated in metastasis                                            |
| Hs.295732.1.5  | chr12:100223494:100225486 | 100223674 | c | NM_014503    | 26 | CDS  | 27340  | DRIM      | down-regulated in metastasis                                            |
| Hs.295917.1.9  | chr8:20113108:20113442    | 20113206  | c | NM_001693    | 6  | CDS  | 526    | ATP6V1B2  | ATPase, H+ transporting, lysosomal 56/58kDa, V1 subunit B, isoform 2    |
| Hs.29679.1.2   | chr6:131950541:131937129  | 131949584 | c | NM_015979    | 30 | CDS  | 9439   | CRSP3     | cofactor required for Sp1 transcriptional activation, subunit 3, 130kDa |
| Hs.29698.1.4   | chr12:132132556:132120092 | 132131743 | c | NM_183238    | 3  | CDS  | 90462  | ZNF605    | zinc finger protein 605                                                 |
| Hs.29802.1.14  | chr4:20246897:20267535    | 20247156  | c | NM_004787    | 30 | CDS  | 9353   | SLIT2     | slit homolog 2 (Drosophila)                                             |
| Hs.298069.1.15 | chr7:128951168:128961031  | 128951428 | c | NM_005011    | 9  | CDS  | 4899   | NRF1      | nuclear respiratory factor 1                                            |
| Hs.298252.1.8  | chr16:20394597:20396191   | 20394682  | c | NM_001010845 | 9  | CDS  | 123876 | LOC123876 | hypothetical protein LOC123876                                          |
| Hs.298351.1.6  | chr17:77546044:77547156   | 77546313  | c | NM_024083    | 5  | CDS  | 79058  | ASPSCR1   | alveolar soft part sarcoma chromosome region, candidate 1               |
| Hs.298573.1.14 | chr1:245320483:245318561  | 245319980 | c | NM_030645    | 4  | CDS  | 80851  | SH3BP5L   | SH3-binding domain protein 5-like                                       |
| Hs.298658.1.10 | chr4:38514067:38518932    | 38514424  | c | NM_016531    | 4  | CDS  | 51274  | KLF3      | Kruppel-like factor 3 (basic)                                           |
| Hs.298658.1.12 | chr4:38514067:38518932    | 38514935  | c | NM_016531    | 4  | CDS  | 51274  | KLF3      | Kruppel-like factor 3 (basic)                                           |
| Hs.298863.1.10 | chr5:35706087:35726895    | 35706141  | c | NM_024867    | 10 | CDS  | 79925  | FLJ23577  | KPL2 protein                                                            |

|                |                          |           |   |              |    |      |        |          |                                                                                                         |
|----------------|--------------------------|-----------|---|--------------|----|------|--------|----------|---------------------------------------------------------------------------------------------------------|
| Hs.298863.1.11 | chr5:35706087:35726895   | 35706204  | c | NM_024867    | 10 | CDS  | 79925  | FLJ23577 | KPL2 protein                                                                                            |
| Hs.298863.1.12 | chr5:35706087:35726895   | 35707432  | c | NM_024867    | 10 | CDS  | 79925  | FLJ23577 | KPL2 protein                                                                                            |
| Hs.298863.1.17 | chr5:35744981:35748670   | 35746705  | c | NM_024867    | 19 | CDS  | 79925  | FLJ23577 | KPL2 protein                                                                                            |
| Hs.298885.1.21 | chrX:23485650:23484514   | 23485611  | c | NM_012332    | 9  | CDS  | 23597  | ACATE2   | acyl-Coenzyme A thioesterase 2, mitochondrial                                                           |
| Hs.298885.1.25 | chrX:23490908:23485719   | 23490901  | c | NM_012332    | 8  | CDS  | 23597  | ACATE2   | acyl-Coenzyme A thioesterase 2, mitochondrial                                                           |
| Hs.298990.1.10 | chr9:2037485:2044596     | 2037954   | c | NM_003070    | 5  | CDS  | 6595   | SMARCA2  | SWI/SNF related, matrix associated, actin dependent regulator of chromatin, subfamily a, member 2       |
| Hs.299560.1.5  | chr7:148856275:148857160 | 148856779 | c | NM_032534    | 5  | CDS  | 84626  | KIAA1862 | KIAA1862 protein                                                                                        |
| Hs.30026.1.9   | chr1:1585419:1565650     | 1582997   | c | NM_014188    | 2  | CDS  | 29101  | SSU72    | Ssu72 RNA polymerase II CTD phosphatase homolog (yeast)                                                 |
| Hs.301658.1.14 | chr16:83670111:83672421  | 83670258  | c | NM_014732    | 8  | CDS  | 9764   | KIAA0513 | KIAA0513                                                                                                |
| Hs.301658.1.15 | chr16:83670111:83672421  | 83670861  | c | NM_014732    | 8  | CDS  | 9764   | KIAA0513 | KIAA0513                                                                                                |
| Hs.301927.1.4  | chrX:153870683:153881241 | 153870909 | c | NM_001018055 | 5  | CDS  | 79184  | CXorf53  | chromosome X open reading frame 53                                                                      |
| Hs.302034.1.1  | chr1:20215390:20216378   | 20215879  | c | NM_022819    | 3  | CDS  | 64600  | PLA2G2F  | phospholipase A2, group IIF                                                                             |
| Hs.302051.1.51 | chr17:31943384:31941408  | 31943044  | c | NM_025109    | 11 | CDS  | 80179  | MYOHD1   | myosin head domain containing 1                                                                         |
| Hs.302123.1.4  | chr20:55621624:55620393  | 55621353  | c | NM_030776    | 5  | CDS  | 81030  | ZBP1     | Z-DNA binding protein 1                                                                                 |
| Hs.30213.1.7   | chr13:76468264:76472593  | 76468413  | c | NM_006493    | 3  | CDS  | 1203   | CLN5     | ceroid-lipofuscinosis, neuronal 5                                                                       |
| Hs.302435.1.11 | chr12:56410544:56409818  | 56410433  | c | NM_014770    | 12 | CDS  | 116986 | CENTG1   | centaurin, gamma 1                                                                                      |
| Hs.303454.1.10 | chr2:72603943:72518655   | 72600255  | c | AK023791     | 5  | CDS  | 23233  | SEC15L2  | SEC15-like 2 ( <i>S. cerevisiae</i> )                                                                   |
| Hs.303676.1.29 | chr4:76937428:76936445   | 76937309  | c | NM_012297    | 7  | CDS  | 9908   | G3BP2    | Ras-GTPase activating protein SH3 domain-binding protein 2                                              |
| Hs.303676.1.35 | chr4:76939286:76938234   | 76938968  | c | NM_012297    | 5  | CDS  | 9908   | G3BP2    | Ras-GTPase activating protein SH3 domain-binding protein 2                                              |
| Hs.303808.1.37 | chr2:75840979:75840069   | 75840577  | c | NM_003203    | 3  | CDS  | 6936   | C2orf3   | chromosome 2 open reading frame 3                                                                       |
| Hs.303820.1.13 | chr4:15189316:15192598   | 15189564  | c | AB037766     | 6  | CDS  | 57545  | KIAA1345 | KIAA1345 protein                                                                                        |
| Hs.303820.1.15 | chr4:15194649:15205338   | 15194694  | c | AB037766     | 9  | CDS  | 57545  | KIAA1345 | KIAA1345 protein                                                                                        |
| Hs.30385.1.29  | chr10:22002855:22010266  | 22002981  | c | NM_001009569 | 10 | CDS  | 8028   | MLLT10   | myeloid/lymphoid or mixed-lineage leukemia (trithorax homolog, <i>Drosophila</i> ); translocated to, 10 |
| Hs.303930.1.10 | chr7:138303024:138307132 | 138303344 | c | NM_024926    | 8  | CDS  | 79989  | FLJ12571 | hypothetical protein FLJ12571                                                                           |
| Hs.304362.1.40 | chr8:133924303:133925582 | 133924538 | c | NM_016018    | 20 | 3UTR | 51105  | PHF20L1  | PHD finger protein 20-like 1                                                                            |
| Hs.304376.1.11 | chr1:201110276:201107099 | 201110257 | c | NM_032833    | 1  | CDS  | 84919  | PPP1R15B | protein phosphatase 1, regulatory (inhibitor) subunit 15B                                               |
| Hs.304475.1.26 | chr5:169630300:169628065 | 169629820 | c | NM_005565    | 7  | CDS  | 3937   | LCP2     | lymphocyte cytosolic protein 2 (SH2 domain containing leukocyte protein of 76kDa)                       |
| Hs.304578.1.24 | chr7:37024230:36946080   | 37023930  | c | NM_014800    | 13 | CDS  | 9844   | ELMO1    | engulfment and cell motility 1 (ced-12 homolog, <i>C. elegans</i> )                                     |
| Hs.30561.1.12  | chr8:95473012:95468564   | 95472561  | c | NM_012415    | 10 | CDS  | 25788  | RAD54B   | RAD54 homolog B ( <i>S. cerevisiae</i> )                                                                |
| Hs.30570.1.11  | chrX:48511254:48510390   | 48510687  | c | NM_005834    | 2  | CDS  | 10245  | TIMM17B  | translocase of inner mitochondrial membrane 17 homolog B (yeast)                                        |
| Hs.306221.1.4  | chr1:90182825:90184924   | 90184021  | c | NM_182976    | 4  | CDS  | 284695 | ZNF326   | zinc finger protein 326                                                                                 |
| Hs.306329.1.10 | chr15:78202198:78210576  | 78202464  | c | NM_019006    | 5  | CDS  | 54469  | ZA20D3   | zinc finger, A20 domain containing 3                                                                    |
| Hs.306425.1.55 | chr6:83006601:83000692   | 83006266  | c | NM_015525    | 2  | CDS  | 25998  | IBTK     | inhibitor of Bruton agammaglobulinemia tyrosine kinase                                                  |
| Hs.306777.1.15 | chr17:35326860:35322277  | 35326060  | c | NM_018530    | 1  | CDS  | 55876  | GSDML    | gasdermin-like                                                                                          |
| Hs.307529.1.17 | chr3:44829677:44831406   | 44829766  | c | NM_020242    | 19 | CDS  | 56992  | KIF15    | kinesin family member 15                                                                                |
| Hs.307529.1.29 | chr3:44864554:44865016   | 44864557  | c | NM_020242    | 31 | CDS  | 56992  | KIF15    | kinesin family member 15                                                                                |
| Hs.307720.1.13 | chr2:25554034:25522882   | 25553812  | c | NM_021907    | 16 | CDS  | 1838   | DTNB     | dystrobrevin, beta                                                                                      |
| Hs.30783.1.12  | chr19:18562744:18563917  | 18563115  | c | BC012078     | 4  | CDS  | 55049  | FLJ20850 | hypothetical protein FLJ20850                                                                           |
| Hs.30792.1.42  | chr19:12746482:12744859  | 12745924  | c | NM_013312    | 3  | CDS  | 29911  | HOOK2    | hook homolog 2 ( <i>Drosophila</i> )                                                                    |
| Hs.307924.1.14 | chrX:11543506:11546348   | 11543839  | c | NM_006800    | 8  | CDS  | 10943  | MSL3L1   | male-specific lethal 3-like 1 ( <i>Drosophila</i> )                                                     |



|                |                           |           |   |              |    |      |        |          |                                                                                           |
|----------------|---------------------------|-----------|---|--------------|----|------|--------|----------|-------------------------------------------------------------------------------------------|
| Hs.307924.1.16 | chrX:11543506:11546348    | 11544061  | c | NM_006800    | 8  | CDS  | 10943  | MSL3L1   | male-specific lethal 3-like 1 (Drosophila)                                                |
| Hs.307924.1.17 | chrX:11543506:11546348    | 11545753  | c | NM_006800    | 8  | CDS  | 10943  | MSL3L1   | male-specific lethal 3-like 1 (Drosophila)                                                |
| Hs.307924.1.19 | chrX:11546459:11549931    | 11546878  | c | NM_006800    | 9  | CDS  | 10943  | MSL3L1   | male-specific lethal 3-like 1 (Drosophila)                                                |
| Hs.308.1.12    | chrX:69283980:69284546    | 69284103  | c | NM_004312    | 15 | CDS  | 407    | ARR3     | arrestin 3, retinal (X-arrestin)                                                          |
| Hs.308171.1.13 | chr12:130877828:130879067 | 130877899 | c | NM_004592    | 6  | CDS  | 6433   | SFRS8    | splicing factor, arginine/serine-rich 8 (suppressor-of-white-apricot homolog, Drosophila) |
| Hs.308628.1.10 | chr5:100249945:100220000  | 100248914 | c | NM_005668    | 3  | CDS  | 7903   | ST8SIA4  | ST8 alpha-N-acetyl-neuraminide alpha-2,8-sialyltransferase 4                              |
| Hs.308628.1.11 | chr5:100249945:100220000  | 100249840 | c | NM_005668    | 3  | CDS  | 7903   | ST8SIA4  | ST8 alpha-N-acetyl-neuraminide alpha-2,8-sialyltransferase 4                              |
| Hs.308628.1.19 | chr5:100266445:100259389  | 100266291 | c | NM_005668    | 1  | CDS  | 7903   | ST8SIA4  | ST8 alpha-N-acetyl-neuraminide alpha-2,8-sialyltransferase 4                              |
| Hs.30917.1.5   | chr2:101458512:101430347  | 101458356 | c | NM_153836    | 2  | CDS  | 200407 | CREG2    | cellular repressor of E1A-stimulated genes 2                                              |
| Hs.309288.1.26 | chr10:11411067:11412424   | 11411229  | c | NM_006561    | 13 | 3UTR | 10659  | CUGBP2   | CUG triplet repeat, RNA binding protein 2                                                 |
| Hs.309403.1.23 | chr1:17042569:17043265    | 17042764  | c | NM_014675    | 35 | CDS  | 9696   | CROCC    | ciliary rootlet coiled-coil, rootletin                                                    |
| Hs.309602.1.5  | chr6:30246765:30247587    | 30246860  | c | NM_033229    | 7  | CDS  | 89870  | TRIM15   | tripartite motif-containing 15                                                            |
| Hs.309753.1.3  | chr7:38020571:38027197    | 38020893  | c | NM_032016    | 2  | CDS  | 83930  | STARD3NL | STARD3 N-terminal like                                                                    |
| Hs.3100.1.15   | chr16:74227078:74225692   | 74226723  | c | NM_005548    | 6  | CDS  | 3735   | KARS     | lysyl-tRNA synthetase                                                                     |
| Hs.310399.1.25 | chr15:43254708:43253207   | 43254398  | c | NM_138356    | 4  | CDS  | 90525  | SHF      | Src homology 2 domain containing F                                                        |
| Hs.310421.1.8  | chr10:26830047:26832131   | 26830873  | c | NM_019043    | 5  | CDS  | 54518  | APBB1IP  | amyloid beta (A4) precursor protein-binding, family B, member 1 interacting protein       |
| Hs.310429.1.9  | chr14:50262420:50260141   | 50262300  | c | NM_020921    | 31 | CDS  | 51199  | NIN      | ninein (GSK3B interacting protein)                                                        |
| Hs.310637.1.5  | chr1:93383210:93384684    | 93383217  | c | AK126045     | 2  | 5UTR | 343099 | CCDC18   | coiled-coil domain containing 18                                                          |
| Hs.311100.1.12 | chr3:47518143:47514927    | 47517933  | c | NM_017713    | 5  | CDS  | 54859  | FLJ20211 | hypothetical protein FLJ20211                                                             |
| Hs.311346.1.1  | chr12:22090765:22099349   | 22091136  | c | NM_018686    | 1  | CDS  | 55907  | CMAS     | cytidine monophosphate N-acetylneuraminic acid synthetase                                 |
| Hs.312485.1.21 | chr4:111043296:111040453  | 111043079 | c | NM_000204    | 3  | CDS  | 3426   | IF       | I factor (complement)                                                                     |
| Hs.312644.1.7  | chr2:108461347:108462293  | 108461500 | c | NM_006588    | 6  | CDS  | 27233  | SULT1C2  | sulfotransferase family, cytosolic, 1C, member 2                                          |
| Hs.314338.1.32 | chr21:39525972:39523233   | 39525562  | c | NM_018963    | 25 | CDS  | 54014  | BRWD1    | bromodomain and WD repeat domain containing 1                                             |
| Hs.314338.1.45 | chr21:39592227:39590160   | 39591873  | c | NM_018963    | 5  | CDS  | 54014  | BRWD1    | bromodomain and WD repeat domain containing 1                                             |
| Hs.314338.1.6  | chr21:39490293:39481214   | 39484018  | c | NM_018963    | 41 | CDS  | 54014  | BRWD1    | bromodomain and WD repeat domain containing 1                                             |
| Hs.314413.1.61 | chr13:98310659:98306287   | 98310436  | c | NM_015296    | 33 | CDS  | 23348  | DOCK9    | dedicator of cytokinesis 9                                                                |
| Hs.316890.1.40 | chr20:17897017:17885682   | 17896344  | c | NM_014426    | 1  | CDS  | 27131  | SNX5     | sorting nexin 5                                                                           |
| Hs.317243.1.2  | chr11:71477860:71482189   | 71477973  | c | NM_145309    | 3  | CDS  | 220074 | LRRCS1   | leucine rich repeat containing 51                                                         |
| Hs.317590.1.12 | chr19:38114174:38109731   | 38113971  | c | NM_032816    | 9  | CDS  | 84902  | FLJ14640 | hypothetical protein FLJ14640                                                             |
| Hs.317590.1.15 | chr19:38120376:38119867   | 38120278  | c | AK027546     | 5  | 5UTR | 84902  | FLJ14640 | hypothetical protein FLJ14640                                                             |
| Hs.317593.1.31 | chr13:113236557:113241672 | 113236668 | c | NM_017905    | 9  | CDS  | 55002  | TMCO3    | transmembrane and coiled-coil domains 3                                                   |
| Hs.31845.1.6   | chr15:98987771:99006050   | 98987937  | c | NM_198243    | 5  | CDS  | 140460 | ASB7     | ankyrin repeat and SOCS box-containing 7                                                  |
| Hs.318547.1.20 | chr11:48108845:48114166   | 48108924  | c | NM_002843    | 8  | CDS  | 5795   | PTPRJ    | protein tyrosine phosphatase, receptor type, J                                            |
| Hs.318775.1.9  | chr2:179072742:179073257  | 179073013 | c | NM_032523    | 16 | CDS  | 114880 | OSBPL6   | oxysterol binding protein-like 6                                                          |
| Hs.318894.1.7  | chr6:142763427:142764823  | 142763606 | c | NM_020455    | 11 | CDS  | 57211  | GPR126   | G protein-coupled receptor 126                                                            |
| Hs.319171.1.1  | chr3:103029719:103031146  | 103029765 | c | NM_001005474 | 1  | 5UTR | 64332  | NFKBIZ   | nuclear factor of kappa light polypeptide gene enhancer in B-cells inhibitor, zeta        |
| Hs.319503.1.3  | chrX:23158026:23170304    | 23159208  | c | NM_173495    | 2  | CDS  | 139411 | PTCHD1   | patched domain containing 1                                                               |
| Hs.320823.1.5  | chr20:17899014:17904326   | 17899081  | c | NM_052865    | 1  | CDS  | 92667  | C20orf72 | chromosome 20 open reading frame 72                                                       |
| Hs.320823.1.6  | chr20:17899014:17904326   | 17899410  | c | NM_052865    | 1  | CDS  | 92667  | C20orf72 | chromosome 20 open reading frame 72                                                       |
| Hs.321045.1.8  | chr1:203036733:203037918  | 203036873 | c | NM_014002    | 5  | CDS  | 9641   | IKBKE    | inhibitor of kappa light polypeptide gene enhancer in B-cells, kinase epsilon             |
| Hs.321234.1.26 | chr1:11075086:11074873    | 11075024  | c | NM_002685    | 12 | CDS  | 5394   | EXOSC10  | exosome component 10                                                                      |

|                |                           |           |   |              |    |      |        |              |                                                                     |
|----------------|---------------------------|-----------|---|--------------|----|------|--------|--------------|---------------------------------------------------------------------|
| Hs.321273.1.21 | chr7:132622148:132772052  | 132622381 | c | NM_021807    | 9  | CDS  | 60412  | SEC8L1       | SEC8-like 1 ( <i>S. cerevisiae</i> )                                |
| Hs.321273.1.22 | chr7:132622148:132772052  | 132622914 | c | NM_021807    | 9  | CDS  | 60412  | SEC8L1       | SEC8-like 1 ( <i>S. cerevisiae</i> )                                |
| Hs.32148.1.9   | chr15:99630491:99629374   | 99630000  | c | NM_203472    | 6  | 3UTR | 55829  | SELS         | selenoprotein S                                                     |
| Hs.321653.1.23 | chr1:158013377:158025339  | 158013470 | c | NM_032174    | 10 | 3UTR | 84134  | TOMM40L      | translocase of outer mitochondrial membrane 40 homolog-like (yeast) |
| Hs.323489.1.38 | chr2:86275344:86275762    | 86275646  | c | NM_017952    | 22 | CDS  | 55037  | FLJ20758     | FLJ20758 protein                                                    |
| Hs.323583.1.18 | chr4:159449222:159434583  | 159447111 | c | NM_016613    | 2  | CDS  | 51313  | DKFZp434L142 | hypothetical protein DKFZp434L142                                   |
| Hs.324271.1.14 | chr7:102337821:102337521  | 102337758 | c | NM_198990    | 5  | 3UTR | 222236 | NAPE-PLD     | N-acyl-phosphatidylethanolamine-hydrolyzing phospholipase D         |
| Hs.325275.1.2  | chr10:68358217:68527350   | 68358543  | c | NM_178011    | 2  | CDS  | 347731 | LRRTM3       | leucine rich repeat transmembrane neuronal 3                        |
| Hs.325404.1.30 | chr12:101773706:101762909 | 101773531 | c | NM_000277    | 4  | CDS  | 5053   | PAH          | phenylalanine hydroxylase                                           |
| Hs.325404.1.31 | chr12:101773706:101762909 | 101773575 | c | NM_000277    | 4  | CDS  | 5053   | PAH          | phenylalanine hydroxylase                                           |
| Hs.325422.1.14 | chr1:21545385:21546698    | 21545499  | c | NM_032264    | 7  | CDS  | 84224  | AE2          | hypothetical protein AE2                                            |
| Hs.325528.1.4  | chr5:169062010:169067750  | 169062205 | c | NM_004946    | 14 | CDS  | 1794   | DOCK2        | dedicator of cytokinesis 2                                          |
| Hs.325825.1.6  | chr16:65213465:65208763   | 65213364  | c | NM_178818    | 4  | CDS  | 146223 | CKLFSF4      | chemokine-like factor super family 4                                |
| Hs.3260.1.1    | chr14:72673685:72684255   | 72674659  | c | NM_007318    | 1  | 5UTR | 5663   | PSEN1        | presenilin 1 (Alzheimer disease 3)                                  |
| Hs.3260.1.9    | chr14:72710169:72723313   | 72710665  | c | NM_000021    | 5  | CDS  | 5663   | PSEN1        | presenilin 1 (Alzheimer disease 3)                                  |
| Hs.326217.1.4  | chr19:53858531:53857111   | 53857544  | c | NM_145807    | 6  | CDS  | 126147 | LOC126147    | hypothetical protein BC018697                                       |
| Hs.326387.1.11 | chrX:102746243:102739725  | 102744151 | c | NM_012286    | 2  | 5UTR | 9643   | MORF4L2      | mortality factor 4 like 2                                           |
| Hs.326730.1.34 | chr22:18372531:18352890   | 18370198  | c | NM_001670    | 2  | 5UTR | 421    | ARVCF        | armadillo repeat gene deletes in velocardiofacial syndrome          |
| Hs.326950.1.6  | chr14:23494262:23498950   | 23494597  | c | NM_021004    | 2  | CDS  | 10901  | DHRS4        | dehydrogenase/reductase (SDR family) member 4                       |
| Hs.32706.1.10  | chr19:45758150:45763168   | 45758253  | c | NM_020971    | 27 | CDS  | 57731  | SPTBN4       | spectrin, beta, non-erythrocytic 4                                  |
| Hs.32706.1.11  | chr19:45758150:45763168   | 45758498  | c | NM_020971    | 27 | CDS  | 57731  | SPTBN4       | spectrin, beta, non-erythrocytic 4                                  |
| Hs.32721.1.21  | chr2:234032973:234037048  | 234036822 | c | NM_000541    | 14 | CDS  | 6295   | SAG          | S-antigen; retina and pineal gland (arrestin)                       |
| Hs.330663.1.20 | chr12:101060854:101061973 | 101061120 | c | NM_017915    | 5  | CDS  | 55010  | FLJ20641     | hypothetical protein FLJ20641                                       |
| Hs.330663.1.21 | chr12:101060854:101061973 | 101061165 | c | NM_017915    | 5  | CDS  | 55010  | FLJ20641     | hypothetical protein FLJ20641                                       |
| Hs.330663.1.9  | chr12:101044709:101050113 | 101045252 | c | NM_017915    | 3  | CDS  | 55010  | FLJ20641     | hypothetical protein FLJ20641                                       |
| Hs.331141.1.10 | chr12:110622264:110630329 | 110622386 | c | AK097425     | 3  | CDS  | 80724  | ACAD10       | acyl-Coenzyme A dehydrogenase family, member 10                     |
| Hs.331141.1.12 | chr12:110622264:110630329 | 110622514 | c | AK097425     | 3  | CDS  | 80724  | ACAD10       | acyl-Coenzyme A dehydrogenase family, member 10                     |
| Hs.331141.1.20 | chr12:110645568:110646667 | 110645946 | c | NM_025247    | 13 | CDS  | 80724  | ACAD10       | acyl-Coenzyme A dehydrogenase family, member 10                     |
| Hs.331431.1.51 | chr4:39722574:39714551    | 39722157  | c | NM_015200    | 17 | CDS  | 23244  | SCC-112      | SCC-112 protein                                                     |
| Hs.331431.1.52 | chr4:39722574:39714551    | 39722208  | c | NM_015200    | 17 | CDS  | 23244  | SCC-112      | SCC-112 protein                                                     |
| Hs.331431.1.55 | chr4:39722574:39714551    | 39722491  | c | NM_015200    | 17 | CDS  | 23244  | SCC-112      | SCC-112 protein                                                     |
| Hs.331555.1.25 | chr5:147484594:147485478  | 147484694 | c | NM_006846    | 28 | CDS  | 11005  | SPINK5       | serine protease inhibitor, Kazal type 5                             |
| Hs.331555.1.3  | chr5:147449378:147450920  | 147449797 | c | NM_006846    | 7  | CDS  | 11005  | SPINK5       | serine protease inhibitor, Kazal type 5                             |
| Hs.332706.1.10 | chr10:13198347:13200911   | 13198546  | c | BC032762     | 7  | CDS  | 10133  | OPTN         | optineurin                                                          |
| Hs.332847.1.30 | chr2:36676341:36683169    | 36676406  | c | NM_016441    | 14 | CDS  | 51232  | CRIM1        | cysteine rich transmembrane BMP regulator 1 (chordin-like)          |
| Hs.333274.1.7  | chr7:70933292:70720129    | 70933160  | c | NM_001017440 | 4  | CDS  | 83698  | CALN1        | calneuron 1                                                         |
| Hs.333907.1.15 | chr14:61022128:61065545   | 61022255  | c | NM_006255    | 10 | CDS  | 5583   | PRKCH        | protein kinase C, eta                                               |
| Hs.334.1.8     | chr7:143510417:143511860  | 143510946 | c | NM_001002861 | 13 | 3UTR | 7984   | ARHGEF5      | Rho guanine nucleotide exchange factor (GEF) 5                      |
| Hs.33446.1.3   | chr1:196740581:196744558  | 196742288 | c | NM_205860    | 2  | CDS  | 2494   | NR5A2        | nuclear receptor subfamily 5, group A, member 2                     |
| Hs.334479.1.7  | chr16:2158171:2160615     | 2158509   | c | NM_032271    | 4  | CDS  | 84231  | TRAF7        | TNF receptor-associated factor 7                                    |
| Hs.334633.1.3  | chr5:43417659:43413344    | 43417012  | c | NM_019846    | 3  | 3UTR | 56477  | CCL28        | chemokine (C-C motif) ligand 28                                     |
| Hs.334674.1.49 | chrX:53113752:53111362    | 53113482  | c | NM_004187    | 14 | CDS  | 8242   | SMCX         | Smcy homolog, X-linked (mouse)                                      |
| Hs.334832.1.9  | chr1:199663850:199663485  | 199663717 | c | NM_016243    | 8  | CDS  | 51706  | CYB5R1       | cytochrome b5 reductase 1                                           |

|                |                           |           |   |              |    |      |        |           |                                                                                                           |
|----------------|---------------------------|-----------|---|--------------|----|------|--------|-----------|-----------------------------------------------------------------------------------------------------------|
| Hs.334868.1.27 | chr14:62990159:62958566   | 62987740  | c | NM_006246    | 3  | CDS  | 5529   | PPP2R5E   | protein phosphatase 2, regulatory subunit B (B56), epsilon isoform                                        |
| Hs.335057.1.12 | chr2:241995504:241996786  | 241995626 | c | NM_001008491 | 6  | CDS  | 4735   | SEPT2     | septin 2                                                                                                  |
| Hs.335163.1.14 | chr4:41462386:41481876    | 41462877  | c | NM_014988    | 8  | CDS  | 22998  | KIAA1102  | KIAA1102 protein                                                                                          |
| Hs.335163.1.15 | chr4:41462386:41481876    | 41463239  | c | NM_014988    | 8  | CDS  | 22998  | KIAA1102  | KIAA1102 protein                                                                                          |
| Hs.335293.1.46 | chr1:934451:932797        | 933783    | c | NM_015658    | 2  | CDS  | 26155  | NOC2L     | nucleolar complex associated 2 homolog (S. cerevisiae)                                                    |
| Hs.335513.1.32 | chr6:6250582:6212042      | 6250345   | c | NM_000129    | 3  | CDS  | 2162   | F13A1     | coagulation factor XIII, A1 polypeptide                                                                   |
| Hs.335614.1.17 | chr22:29136947:29142819   | 29137518  | c | NM_012429    | 11 | CDS  | 23541  | SEC14L2   | SEC14-like 2 (S. cerevisiae)                                                                              |
| Hs.335817.1.7  | chr12:2575431:2576863     | 2575633   | c | Z74996       | 20 | CDS  | 775    | CACNA1C   | calcium channel, voltage-dependent, L type, alpha 1C subunit                                              |
| Hs.335877.1.2  | chr16:82827836:82814128   | 82826515  | c | NM_172347    | 2  | CDS  | 93107  | KCNG4     | potassium voltage-gated channel, subfamily G, member 4                                                    |
| Hs.335891.1.5  | chr16:46802359:46799909   | 46800277  | c | NM_032583    | 11 | CDS  | 85320  | ABCC11    | ATP-binding cassette, sub-family C (CFTR/MRP), member 11                                                  |
| Hs.336431.1.27 | chr22:48965026:48963479   | 48963873  | c | NM_001008658 | 13 | CDS  | 85378  | TUBGCP6   | tubulin, gamma complex associated protein 6                                                               |
| Hs.33719.1.20  | chr3:9858666:9857490      | 9858184   | c | NM_173659    | 4  | CDS  | 285367 | RPUSD3    | RNA pseudouridylate synthase domain containing 3                                                          |
| Hs.337730.1.19 | chr16:25088036:25089535   | 25088318  | c | NM_016015    | 9  | CDS  | 51451  | LCMT1     | leucine carboxyl methyltransferase 1                                                                      |
| Hs.339646.1.5  | chr4:88166089:88154776    | 88165129  | c | NM_144645    | 4  | 3UTR | 132989 | MGC26744  | hypothetical protein MGC26744                                                                             |
| Hs.339735.1.48 | chr13:112963075:112965801 | 112963118 | c | NM_001008895 | 19 | CDS  | 8451   | CUL4A     | cullin 4A                                                                                                 |
| Hs.339811.1.6  | chr4:70250907:70247198    | 70250567  | c | NM_001073    | 5  | CDS  | 10720  | UGT2B11   | UDP glucuronosyltransferase 2 family, polypeptide B11                                                     |
| Hs.34024.1.22  | chr3:172301939:172294460  | 172301856 | c | NM_015028    | 22 | CDS  | 23043  | TNIK      | TRAF2 and NCK interacting kinase                                                                          |
| Hs.34045.1.4   | chr14:104548541:104548016 | 104548088 | c | NM_145701    | 2  | 3UTR | 55038  | CDCA4     | cell division cycle associated 4                                                                          |
| Hs.3416.1.25   | chr9:19113562:19111164    | 19113279  | c | NM_001122    | 4  | CDS  | 123    | ADFP      | adipose differentiation-related protein                                                                   |
| Hs.341906.1.3  | chr3:120917281:120927707  | 120917471 | c | NM_033364    | 6  | CDS  | 89876  | C3orf15   | chromosome 3 open reading frame 15                                                                        |
| Hs.341906.1.7  | chr3:120942233:120945511  | 120942336 | c | NM_033364    | 13 | CDS  | 89876  | C3orf15   | chromosome 3 open reading frame 15                                                                        |
| Hs.34341.1.8   | chr1:116776569:116773932  | 116776461 | c | NM_001779    | 4  | CDS  | 965    | CD58      | CD58 antigen, (lymphocyte function-associated antigen 3)                                                  |
| Hs.343487.1.2  | chr3:141884700:141889261  | 141885655 | c | NM_152616    | 2  | CDS  | 287015 | TRIM42    | tripartite motif-containing 42                                                                            |
| Hs.343589.1.1  | chr8:145205791:145206833  | 145206157 | c | NM_019037    | 1  | CDS  | 54512  | EXOSC4    | exosome component 4                                                                                       |
| Hs.344400.1.13 | chr16:80755187:80742621   | 80755026  | c | NM_005792    | 2  | CDS  | 10200  | MPHOSPH6  | M-phase phosphoprotein 6                                                                                  |
| Hs.344812.1.18 | chr3:48477203:48480147    | 48477215  | c | NM_032166    | 8  | CDS  | 11277  | TREX1     | three prime repair exonuclease 1                                                                          |
| Hs.34492.1.4   | chr10:104612680:104613476 | 104612739 | c | NM_144591    | 5  | 3UTR | 119032 | C10orf32  | chromosome 10 open reading frame 32                                                                       |
| Hs.345877.1.3  | chr18:42311614:42311182   | 42311234  | c | BC041860     | 23 | CDS  | 125336 | LOXHD1    | lipoygenase homology domains 1                                                                            |
| Hs.3459.1.15   | chr16:23444065:23443277   | 23443842  | c | NM_133451    | 8  | CDS  | 124454 | KIAA1970  | KIAA1970 protein                                                                                          |
| Hs.346736.1.10 | chr2:99270738:99281614    | 99270773  | c | AK126402     | 10 | 3UTR | 51263  | MRPL30    | mitochondrial ribosomal protein L30                                                                       |
| Hs.346736.1.6  | chr2:99270171:99270553    | 99270279  | c | NM_145212    | 5  | CDS  | 51263  | MRPL30    | mitochondrial ribosomal protein L30                                                                       |
| Hs.348112.1.23 | chr20:218199:212723       | 218072    | c | NM_153269    | 3  | CDS  | 140680 | C20orf96  | chromosome 20 open reading frame 96                                                                       |
| Hs.34851.1.23  | chr6:112504217:112504009  | 112504164 | c | NM_016262    | 7  | CDS  | 51175  | TUBE1     | tubulin, epsilon 1                                                                                        |
| Hs.348645.1.4  | chr2:74714219:74701206    | 74714042  | c | NM_138804    | 7  | CDS  | 130951 | LOC130951 | hypothetical protein BC014602                                                                             |
| Hs.348920.1.7  | chrX:100201895:100206197  | 100202424 | c | NM_006733    | 15 | CDS  | 2491   | FSHPRH1   | FSH primary response (LRPR1 homolog, rat) 1                                                               |
| Hs.349758.1.12 | chr17:40114896:40113538   | 40114615  | c | NM_144609    | 3  | CDS  | 124808 | FLJ31795  | hypothetical protein FLJ31795                                                                             |
| Hs.350321.1.32 | chr10:42942177:42943565   | 42942279  | c | NM_020975    | 19 | CDS  | 5979   | RET       | ret proto-oncogene (multiple endocrine neoplasia and medullary thyroid carcinoma 1, Hirschsprung disease) |
| Hs.350756.1.12 | chr8:74626800:74497492    | 74624394  | c | BC008369     | 12 | CDS  | 27067  | STAU2     | staufen, RNA binding protein, homolog 2 (Drosophila)                                                      |
| Hs.350899.1.7  | chr1:220243560:220245326  | 220243913 | c | NM_001748    | 6  | CDS  | 824    | CAPN2     | calpain 2, (m/II) large subunit                                                                           |
| Hs.351.1.5     | chr6:167765019:167761992  | 167765008 | c | NM_004610    | 3  | CDS  | 6953   | TCP10     | t-complex 10 (mouse)                                                                                      |
| Hs.351005.1.6  | chr18:31207417:31203623   | 31205773  | c | NM_145756    | 3  | CDS  | 252884 | ZNF396    | zinc finger protein 396                                                                                   |
| Hs.351005.1.8  | chr18:31207417:31203623   | 31207256  | c | NM_145756    | 3  | CDS  | 252884 | ZNF396    | zinc finger protein 396                                                                                   |
| Hs.351403.1.2  | chr3:139266167:139264518  | 139265948 | c | NM_173543    | 15 | CDS  | 199221 | DZIP1L    | DAZ interacting protein 1-like                                                                            |

|                |                           |           |   |              |    |      |        |           |                                                                                               |
|----------------|---------------------------|-----------|---|--------------|----|------|--------|-----------|-----------------------------------------------------------------------------------------------|
| Hs.351403.1.9  | chr3:139293922:139290048  | 139293892 | c | NM_173543    | 5  | CDS  | 199221 | DZIP1L    | DAZ interacting protein 1-like                                                                |
| Hs.351431.1.1  | chr1:151820277:151824951  | 151820617 | c | NM_152494    | 4  | CDS  | 149095 | DCST1     | DC-STAMP domain containing 1                                                                  |
| Hs.351558.1.8  | chr19:40926549:40925545   | 40926323  | c | NM_144987    | 5  | CDS  | 199746 | U2AF1L3   | U2(RNU2) small nuclear RNA auxiliary factor 1-like 3                                          |
| Hs.351571.1.20 | chr16:66886206:66887767   | 66886311  | c | NM_003983    | 8  | CDS  | 9057   | SLC7A6    | solute carrier family 7 (cationic amino acid transporter, y+ system), member 6                |
| Hs.35198.1.5   | chr6:46241082:46237450    | 46241015  | c | NM_021572    | 3  | CDS  | 59084  | ENPP5     | ectonucleotide pyrophosphatase/phosphodiesterase 5 (putative function)                        |
| Hs.352142.1.6  | chr7:73692578:73684233    | 73692417  | c | NM_173537    | 3  | CDS  | 84163  | GTF2IRD2  | GTF2I repeat domain containing 2                                                              |
| Hs.352588.1.4  | chr11:75842081:75846874   | 75842618  | c | NM_020193    | 4  | CDS  | 56946  | C11orf30  | chromosome 11 open reading frame 30                                                           |
| Hs.352591.1.1  | chr10:127658898:127667109 | 127659013 | c | NM_145235    | 2  | CDS  | 92565  | FANK1     | fibronectin type III and ankyrin repeat domains 1                                             |
| Hs.352671.1.13 | chr21:33889531:33885548   | 33889307  | c | NM_145858    | 12 | 3UTR | 9946   | CRYZL1    | crystallin, zeta (quinone reductase)-like 1                                                   |
| Hs.353175.1.28 | chr6:161557690:161545754  | 161557533 | c | NM_020133    | 3  | CDS  | 56895  | AGPAT4    | 1-acylglycerol-3-phosphate O-acyltransferase 4 (lysophosphatidic acid acyltransferase, delta) |
| Hs.353176.1.11 | chr5:45681043:45497867    | 45680780  | c | NM_021072    | 2  | CDS  | 348980 | HCN1      | hyperpolarization activated cyclic nucleotide-gated potassium channel 1                       |
| Hs.354013.1.11 | chr8:92421956:92424756    | 92422062  | c | NM_052832    | 8  | CDS  | 115111 | SLC26A7   | solute carrier family 26, member 7                                                            |
| Hs.354645.1.5  | chr14:94980574:94979380   | 94980205  | c | NM_152592    | 9  | CDS  | 161176 | C14orf49  | chromosome 14 open reading frame 49                                                           |
| Hs.35490.1.14  | chr16:11045431:11048649   | 11045580  | c | NM_015226    | 16 | CDS  | 23274  | KIAA0350  | KIAA0350 protein                                                                              |
| Hs.35490.1.27  | chr16:11127505:11167745   | 11127702  | c | NM_015226    | 22 | CDS  | 23274  | KIAA0350  | KIAA0350 protein                                                                              |
| Hs.355570.1.18 | chr17:39496694:39473151   | 39496483  | c | NM_152344    | 2  | CDS  | 124801 | FLJ30656  | hypothetical protein FLJ30656                                                                 |
| Hs.356399.1.18 | chr1:207874699:207875160  | 207875031 | c | NM_018254    | 10 | CDS  | 55758  | RCOR3     | REST corepressor 3                                                                            |
| Hs.356501.1.14 | chrX:133274671:133276718  | 133274842 | c | NM_001015877 | 8  | CDS  | 84295  | PHF6      | PHD finger protein 6                                                                          |
| Hs.356624.1.39 | chr1:232534797:232531634  | 232534795 | c | NM_002508    | 3  | CDS  | 4811   | NID1      | nidogen 1                                                                                     |
| Hs.356664.1.4  | chr15:43198636:43197560   | 43198563  | c | NM_144565    | 9  | CDS  | 90527  | NIP       | homolog of Drosophila Numb-interacting protein                                                |
| Hs.35758.1.7   | chr10:76273243:76389733   | 76273353  | c | NM_012330    | 1  | CDS  | 23522  | MYST4     | MYST histone acetyltransferase (monocytic leukemia) 4                                         |
| Hs.357637.1.25 | chr1:101072209:101066442  | 101072009 | c | NM_001439    | 1  | 5UTR | 2135   | EXTL2     | exostoses (multiple)-like 2                                                                   |
| Hs.35804.1.14  | chr4:89934365:89936743    | 89935760  | c | NM_014606    | 9  | CDS  | 8916   | HERC3     | hect domain and RLD 3                                                                         |
| Hs.35828.1.14  | chr14:103001884:103002061 | 103001936 | c | NM_002376    | 8  | CDS  | 4140   | MARK3     | MAP/microtubule affinity-regulating kinase 3                                                  |
| Hs.360786.1.5  | chr8:68085503:68063307    | 68085407  | c | NM_001013626 | 5  | CDS  | 286187 | LOC286187 | similar to RIKEN cDNA 1700011J18                                                              |
| Hs.361323.1.6  | chr3:185387366:185387886  | 185387773 | c | NM_018358    | 3  | CDS  | 55324  | ABCF3     | ATP-binding cassette, sub-family F (GCN20), member 3                                          |
| Hs.362817.1.9  | chr17:70725997:70732792   | 70726264  | c | NM_024844    | 7  | CDS  | 79902  | PCNT1     | pericentrin 1                                                                                 |
| Hs.362974.1.2  | chr11:64911169:64917619   | 64911308  | c | AK074850     | 2  | CDS  | 83786  | FKSG44    | FKSG44 gene                                                                                   |
| Hs.363137.1.5  | chr6:160158630:160159953  | 160158764 | c | NM_005891    | 3  | CDS  | 39     | ACAT2     | acetyl-Coenzyme A acetyltransferase 2 (acetoacetyl Coenzyme A thiolase)                       |
| Hs.363140.1.3  | chr19:46323380:46325645   | 46323564  | c | NM_000774    | 9  | CDS  | 1572   | CYP2F1    | cytochrome P450, family 2, subfamily F, polypeptide 1                                         |
| Hs.363492.1.20 | chr2:118299406:118300074  | 118299789 | c | NM_006773    | 10 | CDS  | 8886   | DDX18     | DEAD (Asp-Glu-Ala-Asp) box polypeptide 18                                                     |
| Hs.366053.1.4  | chr2:234633393:234636499  | 234633633 | c | NM_024080    | 6  | CDS  | 79054  | TRPM8     | transient receptor potential cation channel, subfamily M, member 8                            |
| Hs.367182.1.4  | chr17:41744313:41732809   | 41742649  | c | BC000924     | 2  | 3UTR | 440444 | LOC440444 | similar to FALZ protein                                                                       |
| Hs.367182.1.6  | chr17:41772632:41744418   | 41772521  | c | BC000924     | 1  | CDS  | 440444 | LOC440444 | similar to FALZ protein                                                                       |
| Hs.368006.1.3  | chr19:63241387:63243629   | 63241567  | c | NM_182572    | 3  | CDS  | 284312 | ZSCAN1    | zinc finger and SCAN domain containing 1                                                      |
| Hs.368006.1.4  | chr19:63241387:63243629   | 63241620  | c | NM_182572    | 3  | CDS  | 284312 | ZSCAN1    | zinc finger and SCAN domain containing 1                                                      |
| Hs.368084.1.65 | chr2:44112396:44102497    | 44112395  | c | NM_133259    | 11 | CDS  | 10128  | LRPPRC    | leucine-rich PPR-motif containing                                                             |
| Hs.368104.1.2  | chr8:125140209:125129116  | 125139924 | c | NM_182525    | 3  | 3UTR | 157376 | FLJ32770  | hypothetical protein FLJ32770                                                                 |
| Hs.368171.1.19 | chr2:73159022:73140363    | 73158870  | c | NM_144579    | 6  | CDS  | 94097  | SFXN5     | sideroflexin 5                                                                                |

|                |                           |           |   |              |    |      |        |          |                                                                                                                                   |
|----------------|---------------------------|-----------|---|--------------|----|------|--------|----------|-----------------------------------------------------------------------------------------------------------------------------------|
| Hs.368254.1.8  | chr3_random:48878:50603   | 49317     | c | NM_000187    | 5  | CDS  | 3081   | HGD      | homogentisate 1,2-dioxygenase (homogentisate oxidase)                                                                             |
| Hs.368255.1.36 | chr9:111216947:111215874  | 111216751 | c | BC021127     | 3  | CDS  | 23392  | KIAA0368 | KIAA0368                                                                                                                          |
| Hs.368264.1.28 | chr14:101442620:101445678 | 101442737 | c | NM_002719    | 10 | CDS  | 5527   | PPP2R5C  | protein phosphatase 2, regulatory subunit B (B56), gamma isoform                                                                  |
| Hs.368264.1.30 | chr14:101445781:101448490 | 101445800 | c | NM_002719    | 11 | CDS  | 5527   | PPP2R5C  | protein phosphatase 2, regulatory subunit B (B56), gamma isoform                                                                  |
| Hs.368266.1.23 | chr22:17570985:17570376   | 17570804  | c | NM_001835    | 21 | CDS  | 8218   | CLTCL1   | clathrin, heavy polypeptide-like 1                                                                                                |
| Hs.368281.1.29 | chr2:210400485:210415938  | 210400809 | c | NM_002374    | 12 | CDS  | 4133   | MAP2     | microtubule-associated protein 2                                                                                                  |
| Hs.368282.1.39 | chr13:41337871:41305668   | 41337727  | c | NM_001009814 | 12 | CDS  | 23078  | KIAA0564 | KIAA0564 protein                                                                                                                  |
| Hs.368322.1.13 | chr16:60318498:60305364   | 60317921  | c | NM_001796    | 9  | CDS  | 1006   | CDH8     | cadherin 8, type 2                                                                                                                |
| Hs.368353.1.12 | chr1:243137381:243149541  | 243137570 | c | NM_152609    | 9  | CDS  | 163882 | C1orf71  | chromosome 1 open reading frame 71                                                                                                |
| Hs.368375.1.9  | chr19:39950060:39948387   | 39949719  | c | BC092428     | 3  | CDS  | 148103 | ZNF599   | zinc finger protein 599                                                                                                           |
| Hs.368376.1.31 | chr11:125643107:125642818 | 125642908 | c | NM_003139    | 2  | CDS  | 6734   | SRPR     | signal recognition particle receptor ('docking protein')                                                                          |
| Hs.368404.1.24 | chr11:44176145:44184918   | 44176244  | c | NM_000401    | 11 | CDS  | 2132   | EXT2     | exostososes (multiple) 2                                                                                                          |
| Hs.368431.1.21 | chr8:93092405:93086702    | 93091840  | c | NM_004349    | 4  | CDS  | 862    | RUNX1T1  | runt-related transcription factor 1; translocated to, 1 (cyclin D-related)                                                        |
| Hs.368433.1.21 | chr8:81128071:81126419    | 81127828  | c | NM_005079    | 3  | CDS  | 7163   | TPD52    | tumor protein D52                                                                                                                 |
| Hs.368434.1.10 | chr3:58714535:58703340    | 58714483  | c | NM_198463    | 15 | CDS  | 200844 | FLJ42117 | FLJ42117 protein                                                                                                                  |
| Hs.368507.1.12 | chr22:42437628:42432405   | 42437452  | c | NM_022785    | 9  | CDS  | 64800  | FLJ23588 | CAP-binding protein complex interacting protein 1                                                                                 |
| Hs.368554.1.4  | chr11:71371610:71375697   | 71371864  | c | NM_018320    | 4  | CDS  | 55298  | RNF121   | ring finger protein 121                                                                                                           |
| Hs.36859.1.14  | chr14:101745953:101758919 | 101746330 | c | NM_181291    | 3  | CDS  | 91833  | WDR20    | WD repeat domain 20                                                                                                               |
| Hs.368592.1.27 | chr11:120946190:120950159 | 120946469 | c | NM_003105    | 23 | CDS  | 6653   | SORL1    | sortilin-related receptor, L (DLR class) A repeats-containing likely ortholog of mouse immediate early response, erythropoietin 4 |
| Hs.368598.1.14 | chr2:187196075:187196945  | 187196117 | c | NM_018471    | 8  | CDS  | 55854  | LEREPO4  | erythropoietin 4                                                                                                                  |
| Hs.368639.1.2  | chr6:125408290:125420786  | 125408604 | c | NM_152553    | 4  | CDS  | 154214 | IBRDC1   | IBR domain containing 1                                                                                                           |
| Hs.368642.1.8  | chr15:41285819:41282766   | 41285482  | c | NM_000119    | 10 | CDS  | 2038   | EPB42    | erythrocyte membrane protein band 4.2                                                                                             |
| Hs.368647.1.13 | chr14:35847048:35839781   | 35847000  | c | NM_016586    | 7  | CDS  | 51562  | MBIP     | MAP3K12 binding inhibitory protein 1                                                                                              |
| Hs.368783.1.2  | chr20:19951125:19954320   | 19951182  | c | NM_016100    | 2  | CDS  | 51126  | NAT5     | N-acetyltransferase 5 (ARD1 homolog, S. cerevisiae)                                                                               |
| Hs.368851.1.19 | chr5:893609:890596        | 892557    | c | NM_024786    | 5  | CDS  | 79844  | ZDHHC11  | zinc finger, DHHC-type containing 11                                                                                              |
| Hs.368853.1.24 | chr5:1541505:1536602      | 1541434   | c | NM_024830    | 5  | CDS  | 79888  | FLJ12443 | hypothetical protein FLJ12443                                                                                                     |
| Hs.368853.1.3  | chr5:1514954:1514513      | 1514816   | c | AK090444     | 12 | 3UTR | 79888  | FLJ12443 | hypothetical protein FLJ12443                                                                                                     |
| Hs.368878.1.8  | chr17:23711998:23712305   | 23712257  | c | NM_152464    | 5  | CDS  | 147007 | C17orf32 | chromosome 17 open reading frame 32                                                                                               |
| Hs.368921.1.10 | chr1:31790007:31789553    | 31789666  | c | NM_001856    | 67 | CDS  | 1307   | COL16A1  | collagen, type XVI, alpha 1                                                                                                       |
| Hs.368928.1.10 | chr14:50519847:50519434   | 50519750  | c | AK055388     | 9  | CDS  | 114088 | TRIM9    | tripartite motif-containing 9                                                                                                     |
| Hs.368935.2.11 | chr17:18832284:18823712   | 18832045  | c | AK123558     | 2  | 5UTR | NA     | NA       | NA                                                                                                                                |
| Hs.369039.1.5  | chr13:48990289:48993030   | 48990315  | c | NM_016119    | 4  | CDS  | 51131  | PHF11    | PHD finger protein 11                                                                                                             |
| Hs.369056.1.14 | chr2:231140476:231115481  | 231140618 | c | NM_003113    | 8  | CDS  | 6672   | SP100    | nuclear antigen Sp100                                                                                                             |
| Hs.369056.1.25 | chr2:231160319:231163543  | 231160577 | c | NM_003113    | 15 | CDS  | 6672   | SP100    | nuclear antigen Sp100                                                                                                             |
| Hs.369056.1.27 | chr2:231160319:231163543  | 231160744 | c | NM_003113    | 15 | CDS  | 6672   | SP100    | nuclear antigen Sp100                                                                                                             |
| Hs.369056.1.34 | chr2:231198252:231201344  | 231198364 | c | NM_003113    | 23 | CDS  | 6672   | SP100    | nuclear antigen Sp100                                                                                                             |
| Hs.369089.1.14 | chrX:107675725:107704705  | 107675930 | c | NM_000495    | 36 | CDS  | 1287   | COL4A5   | collagen, type IV, alpha 5 (Alport syndrome)                                                                                      |
| Hs.369089.1.15 | chrX:107675725:107704705  | 107676175 | c | NM_000495    | 36 | CDS  | 1287   | COL4A5   | collagen, type IV, alpha 5 (Alport syndrome)                                                                                      |
| Hs.369089.1.16 | chrX:107675725:107704705  | 107676641 | c | NM_000495    | 36 | CDS  | 1287   | COL4A5   | collagen, type IV, alpha 5 (Alport syndrome)                                                                                      |
| Hs.369168.1.16 | chr14:30192546:30209212   | 30192793  | c | NM_016106    | 10 | CDS  | 23256  | SCFD1    | sec1 family domain containing 1                                                                                                   |
| Hs.369232.1.24 | chr2:120601658:120605423  | 120601894 | c | NM_020909    | 17 | CDS  | 57669  | EPB41L5  | erythrocyte membrane protein band 4.1 like 5                                                                                      |
| Hs.369263.1.13 | chr13:32160707:32166359   | 32163405  | c | NM_015032    | 13 | CDS  | 23047  | APRIN    | androgen-induced proliferation inhibitor                                                                                          |
| Hs.369263.1.3  | chr13:32121018:32123940   | 32122754  | c | NM_015032    | 2  | CDS  | 23047  | APRIN    | androgen-induced proliferation inhibitor                                                                                          |
| Hs.369279.1.17 | chr19:60189496:60193201   | 60189572  | c | NM_017852    | 8  | CDS  | 55655  | NALP2    | NACHT, leucine rich repeat and PYD containing 2                                                                                   |

|                |                           |           |   |              |    |      |        |          |                                                                              |
|----------------|---------------------------|-----------|---|--------------|----|------|--------|----------|------------------------------------------------------------------------------|
| Hs.369284.1.17 | chr20:13657024:13647632   | 13657022  | c | NM_016649    | 11 | CDS  | 51575  | C20orf6  | chromosome 20 open reading frame 6                                           |
| Hs.369285.1.15 | chr1:208514347:208508443  | 208514308 | c | BC020523     | 17 | CDS  | 25896  | C1orf73  | chromosome 1 open reading frame 73                                           |
| Hs.369285.1.16 | chr1:208528166:208514439  | 208527859 | c | NM_015434    | 16 | CDS  | 25896  | C1orf73  | chromosome 1 open reading frame 73                                           |
| Hs.369356.1.35 | chr7:104325713:104335822  | 104326006 | c | NM_018682    | 14 | CDS  | 55904  | MLL5     | myeloid/lymphoid or mixed-lineage leukemia 5 (trithorax homolog, Drosophila) |
| Hs.369356.1.43 | chr7:104336593:104339836  | 104336884 | c | NM_018682    | 16 | CDS  | 55904  | MLL5     | myeloid/lymphoid or mixed-lineage leukemia 5 (trithorax homolog, Drosophila) |
| Hs.369356.1.44 | chr7:104336593:104339836  | 104337047 | c | NM_018682    | 16 | CDS  | 55904  | MLL5     | myeloid/lymphoid or mixed-lineage leukemia 5 (trithorax homolog, Drosophila) |
| Hs.369368.1.15 | chr11:32953466:32954455   | 32953752  | c | NM_024774    | 13 | 3UTR | 79832  | FLJ21924 | hypothetical protein FLJ21924                                                |
| Hs.369368.1.22 | chr11:32954576:32962280   | 32955125  | c | NM_024774    | 14 | 3UTR | 79832  | FLJ21924 | hypothetical protein FLJ21924                                                |
| Hs.369397.1.16 | chr5:135411009:135413026  | 135411361 | c | NM_000358    | 6  | CDS  | 7045   | TGFBI    | transforming growth factor, beta-induced, 68kDa                              |
| Hs.369430.1.27 | chr5:102324833:102353874  | 102325035 | c | NM_138821    | 13 | CDS  | 5066   | PAM      | peptidylglycine alpha-amidating monooxygenase                                |
| Hs.369448.1.12 | chr4:79616151:79641845    | 79616370  | c | NM_025074    | 19 | CDS  | 80144  | FRAS1    | Fraser syndrome 1                                                            |
| Hs.369448.1.17 | chr4:79724046:79725059    | 79724966  | c | NM_025074    | 41 | CDS  | 80144  | FRAS1    | Fraser syndrome 1                                                            |
| Hs.369448.1.21 | chr4:79767414:79775137    | 79767491  | c | NM_025074    | 58 | CDS  | 80144  | FRAS1    | Fraser syndrome 1                                                            |
| Hs.369520.1.32 | chr11:85106173:85103199   | 85105925  | c | NM_032943    | 10 | CDS  | 54843  | SYTL2    | synaptotagmin-like 2                                                         |
| Hs.369520.1.34 | chr11:85112722:85109651   | 85112502  | c | NM_206927    | 1  | CDS  | 54843  | SYTL2    | synaptotagmin-like 2                                                         |
| Hs.369581.1.10 | chr5:50127009:50128572    | 50127235  | c | NM_024615    | 12 | CDS  | 79668  | PARP8    | poly (ADP-ribose) polymerase family, member 8                                |
| Hs.369592.1.24 | chr2:43482911:43459331    | 43481798  | c | NM_022065    | 30 | CDS  | 63892  | THADA    | thyroid adenoma associated                                                   |
| Hs.369592.1.35 | chr2:43687999:43680107    | 43687864  | c | NM_022065    | 20 | CDS  | 63892  | THADA    | thyroid adenoma associated                                                   |
| Hs.369592.1.39 | chr2:43695134:43691130    | 43694883  | c | NM_022065    | 17 | CDS  | 63892  | THADA    | thyroid adenoma associated                                                   |
| Hs.369646.1.8  | chr3:196967343:196965520  | 196966311 | c | NM_004532    | 22 | CDS  | 4585   | MUC4     | mucin 4, tracheobronchial                                                    |
| Hs.369675.1.13 | chr8:108366085:108345756  | 108365409 | c | NM_001146    | 7  | CDS  | 284    | ANGPT1   | angiopoietin 1                                                               |
| Hs.369849.1.13 | chr12:67504699:67508817   | 67504805  | c | NM_002392    | 7  | CDS  | 4193   | MDM2     | Mdm2, transformed 3T3 cell double minute 2, p53 binding protein (mouse)      |
| Hs.369920.1.8  | chr12:67336497:67337147   | 67336684  | c | NM_001010942 | 6  | CDS  | 5908   | RAP1B    | RAP1B, member of RAS oncogene family                                         |
| Hs.369924.1.8  | chr10:115626726:115629322 | 115626879 | c | NM_198514    | 3  | CDS  | 374354 | NHLRC2   | NHL repeat containing 2                                                      |
| Hs.369998.1.23 | chr17:40181360:40183488   | 40183133  | c | NM_145663    | 13 | CDS  | 80174  | DRF1     | Dbf4-related factor 1                                                        |
| Hs.370017.1.13 | chr2:99396935:99394781    | 99396531  | c | NM_005783    | 4  | CDS  | 10190  | TXNDC9   | thioredoxin domain containing 9                                              |
| Hs.370017.1.16 | chr2:99396935:99394781    | 99396716  | c | NM_005783    | 4  | CDS  | 10190  | TXNDC9   | thioredoxin domain containing 9                                              |
| Hs.370024.1.43 | chr4:84141649:84140905    | 84141543  | c | NM_014933    | 12 | CDS  | 22872  | SEC31L1  | SEC31-like 1 (S. cerevisiae)                                                 |
| Hs.370140.1.17 | chr17:62533746:62513660   | 62533613  | c | NM_014877    | 31 | CDS  | 9931   | HELZ     | helicase with zinc finger                                                    |
| Hs.370145.1.11 | chr11:74239780:74237156   | 74239563  | c | BC064584     | 11 | CDS  | 143570 | XRRA1    | X-ray radiation resistance associated 1                                      |
| Hs.370255.1.24 | chr17:71244371:71244997   | 71244552  | c | NM_000213    | 16 | CDS  | 3691   | ITGB4    | integrin, beta 4                                                             |
| Hs.370267.1.8  | chr8:9605141:9615293      | 9605329   | c | NM_003747    | 11 | CDS  | 8658   | TNKS     | tankyrase, TRF1-interacting ankyrin-related ADP-ribose polymerase            |
| Hs.370287.1.14 | chr2:207286393:207300139  | 207286668 | c | NM_003812    | 24 | CDS  | 8745   | ADAM23   | a disintegrin and metalloproteinase domain 23                                |
| Hs.370292.1.18 | chr10:127519890:127531683 | 127520176 | c | NM_016567    | 7  | CDS  | 56647  | BCCIP    | BRCA2 and CDKN1A interacting protein                                         |
| Hs.370292.1.22 | chr10:127519890:127531683 | 127521358 | c | NM_016567    | 7  | CDS  | 56647  | BCCIP    | BRCA2 and CDKN1A interacting protein                                         |
| Hs.370379.1.8  | chr9:106816110:106826021  | 106816805 | c | NM_021224    | 9  | CDS  | 58499  | ZNF462   | zinc finger protein 462                                                      |
| Hs.370392.1.59 | chr15:57311192:57307082   | 57310928  | c | NM_004998    | 6  | CDS  | 4643   | MYO1E    | myosin IE                                                                    |
| Hs.370392.1.66 | chr15:57351796:57341001   | 57351602  | c | NM_004998    | 2  | CDS  | 4643   | MYO1E    | myosin IE                                                                    |
| Hs.37048.1.12  | chr4:71047460:71048665    | 71047516  | c | NM_001009181 | 4  | 3UTR | 6779   | STATH    | statherin                                                                    |
| Hs.370515.1.12 | chr11:5643461:5643202     | 5643226   | c | NM_033034    | 7  | CDS  | 85363  | TRIM5    | tripartite motif-containing 5                                                |
| Hs.370522.1.1  | chr6:26531967:26534448    | 26532006  | c | AK056871     | 3  | 3UTR | 54718  | BTN2A3   | butyrophilin, subfamily 2, member A3                                         |
| Hs.370555.1.2  | chr9:136970783:136972952  | 136971038 | c | NM_032874    | 2  | CDS  | 84960  | KIAA1984 | KIAA1984                                                                     |
| Hs.370605.1.25 | chr1:229577493:229555448  | 229577265 | c | NM_014801    | 16 | 3UTR | 80003  | PCNXL2   | pecanex-like 2 (Drosophila)                                                  |
| Hs.370661.1.6  | chr4:120779927:120777497  | 120779581 | c | NM_001083    | 20 | CDS  | 8654   | PDE5A    | phosphodiesterase 5A, cGMP-specific                                          |
| Hs.370661.1.7  | chr4:120779927:120777497  | 120779801 | c | NM_001083    | 20 | CDS  | 8654   | PDE5A    | phosphodiesterase 5A, cGMP-specific                                          |
| Hs.370725.1.30 | chr18:20030086:20015242   | 20025626  | c | NM_018030    | 4  | CDS  | 114876 | OSBPL1A  | oxysterol binding protein-like 1A                                            |

|                 |                           |           |   |              |    |      |        |          |                                                                        |
|-----------------|---------------------------|-----------|---|--------------|----|------|--------|----------|------------------------------------------------------------------------|
| Hs.370781.1.26  | chr16:15030325:15031308   | 15031163  | c | NM_015027    | 15 | CDS  | 23042  | KIAA0251 | KIAA0251 protein                                                       |
| Hs.370854.1.14  | chr9:132815511:132812312  | 132814748 | c | NM_000368    | 12 | CDS  | 7248   | TSC1     | tuberous sclerosis 1                                                   |
| Hs.370885.1.7   | chr22:35804834:35795821   | 35804480  | c | NM_153609    | 10 | CDS  | 164656 | TMPRSS6  | transmembrane protease, serine 6                                       |
| Hs.370937.1.10  | chr6:33379709:33377527    | 33379392  | c | NM_003190    | 7  | CDS  | 6892   | TAPBP    | TAP binding protein (tapasin)                                          |
| Hs.371372.1.16  | chr5:64135970:64217025    | 64136490  | c | NM_005869    | 10 | CDS  | 10283  | SDCCAG10 | serologically defined colon cancer antigen 10                          |
| Hs.371594.1.26  | chr1:46758221:46754347    | 46758135  | c | NM_003684    | 4  | CDS  | 8569   | MKNK1    | MAP kinase interacting serine/threonine kinase 1                       |
| Hs.371597.1.13  | chr2:43933434:43934679    | 43933914  | c | NM_001012665 | 6  | CDS  | 51626  | D2LIC    | dynein 2 light intermediate chain                                      |
| Hs.371597.1.14  | chr2:43933434:43934679    | 43933962  | c | NM_001012665 | 6  | CDS  | 51626  | D2LIC    | dynein 2 light intermediate chain                                      |
| Hs.371597.1.29  | chr2:43944037:43948494    | 43944343  | c | NM_016008    | 12 | CDS  | 51626  | D2LIC    | dynein 2 light intermediate chain                                      |
| Hs.371681.1.32  | chr3:69443103:69434277    | 69442491  | c | AB023230     | 3  | CDS  | 23150  | FRMD4B   | FERM domain containing 4B                                              |
| Hs.371718.1.78  | chr16:27416458:27414315   | 27416449  | c | NM_001520    | 15 | CDS  | 2975   | GTF3C1   | general transcription factor IIIC, polypeptide 1, alpha 220kDa         |
| Hs.371718.1.88  | chr16:27425668:27424939   | 27425413  | c | NM_001520    | 10 | CDS  | 2975   | GTF3C1   | general transcription factor IIIC, polypeptide 1, alpha 220kDa         |
| Hs.371720.1.34  | chr9:90720791:90729585    | 90720985  | c | NM_003177    | 11 | CDS  | 6850   | SYK      | spleen tyrosine kinase                                                 |
| Hs.371979.1.43  | chr20:39535375:39519483   | 39535077  | c | NM_032221    | 17 | CDS  | 84181  | CHD6     | chromodomain helicase DNA binding protein 6                            |
| Hs.371979.1.59  | chr20:39560221:39559556   | 39560156  | c | NM_032221    | 7  | CDS  | 84181  | CHD6     | chromodomain helicase DNA binding protein 6                            |
| Hs.372003.1.23  | chr9:93371418:93373991    | 93373243  | c | NM_014612    | 9  | CDS  | 23196  | C9orf10  | chromosome 9 open reading frame 10                                     |
| Hs.372003.1.28  | chr9:93374167:93385058    | 93374421  | c | NM_014612    | 10 | CDS  | 23196  | C9orf10  | chromosome 9 open reading frame 10                                     |
| Hs.372099.1.24  | chr11:47770913:47770119   | 47770837  | c | NM_015231    | 28 | CDS  | 23279  | NUP160   | nucleoporin 160kDa                                                     |
| Hs.372099.1.61  | chr11:47817970:47815752   | 47817632  | c | NM_015231    | 4  | CDS  | 23279  | NUP160   | nucleoporin 160kDa                                                     |
| Hs.372286.1.19  | chr2:225193186:225190710  | 225192895 | c | NM_003590    | 10 | CDS  | 8452   | CUL3     | cullin 3                                                               |
| Hs.372295.1.47  | chr11:67023769:67023049   | 67023686  | c | NM_004910    | 7  | CDS  | 9600   | PITPNM1  | phosphatidylinositol transfer protein, membrane-associated 1           |
| Hs.372309.1.20  | chr10:120084897:120084716 | 120084760 | c | NM_022063    | 5  | CDS  | 63877  | C10orf84 | chromosome 10 open reading frame 84                                    |
| Hs.372492.1.5   | chr8:142291484:142290979  | 142291209 | c | AK128212     | 7  | CDS  | 57210  | KIAA1126 | KIAA1126 protein                                                       |
| Hs.372658.1.3   | chr1:109112932:109113048  | 109112904 | c | AY312144     | 2  | 3UTR | NA     | NA       | NA                                                                     |
| Hs.372938.1.17  | chr11:64184379:64177771   | 64184048  | c | NM_015080    | 12 | CDS  | 9379   | NRXN2    | neurexin 2                                                             |
| Hs.372939.1.4   | chr22:31173923:31167882   | 31173875  | c | NM_174932    | 2  | CDS  | 254240 | BPIL2    | bactericidal/permeability-increasing protein-like 2                    |
| Hs.373606.1.15  | chr9:127908423:127905734  | 127908019 | c | NM_197956    | 1  | CDS  | 203245 | C9orf90  | chromosome 9 open reading frame 90                                     |
| Hs.373778.1.3   | chr8:31008976:30973756    | 31007899  | c | NM_001015508 | 1  | CDS  | 29942  | PURG     | purine-rich element binding protein G                                  |
| Hs.373947.1.16  | chr3:47291818:47290153    | 47291722  | c | NM_022342    | 3  | CDS  | 64147  | KIF9     | kinesin family member 9                                                |
| Hs.374201.1.25  | chr12:38010310:38006394   | 38010121  | c | NM_017641    | 23 | CDS  | 55605  | KIF21A   | kinesin family member 21A                                              |
| Hs.374262.1.15  | chr9:131844321:131798934  | 131842867 | c | NM_004269    | 4  | CDS  | 9442   | CRSP8    | cofactor required for Sp1 transcriptional activation, subunit 8, 34kDa |
| Hs.374774.1.19  | chr18:19483044:19480250   | 19482373  | c | NM_173505    | 2  | CDS  | 147463 | ANKRD29  | ankyrin repeat domain 29                                               |
| Hs.37482.1.6    | chr17:43464520:43461542   | 43464013  | c | NM_016429    | 6  | CDS  | 51226  | COPZ2    | coatamer protein complex, subunit zeta 2                               |
| Hs.375001.1.100 | chr9:35710808:35710507    | 35710621  | c | NM_006289    | 11 | CDS  | 7094   | TLN1     | talin 1                                                                |
| Hs.375001.1.105 | chr9:35712115:35711801    | 35712115  | c | NM_006289    | 9  | CDS  | 7094   | TLN1     | talin 1                                                                |
| Hs.375001.1.107 | chr9:35713948:35712919    | 35713104  | c | NM_006289    | 7  | CDS  | 7094   | TLN1     | talin 1                                                                |
| Hs.375186.1.5   | chr20:31051540:31049155   | 31051324  | c | NM_080675    | 5  | CDS  | 140732 | SPAG4L   | sperm associated antigen 4-like                                        |
| Hs.375837.1.4   | chr10:134601045:134600550 | 134600609 | c | NM_173572    | 6  | CDS  | 255352 | C10orf93 | chromosome 10 open reading frame 93                                    |
| Hs.376064.1.31  | chr20:2585542:2585726     | 2585662   | c | NM_006392    | 10 | CDS  | 10528  | NOL5A    | nucleolar protein 5A (56kDa with KKE/D repeat)                         |
| Hs.377257.1.1   | chr2:178803081:178806495  | 178804154 | c | NM_152945    | 1  | CDS  | 129831 | DRB1     | developmentally regulated RNA-binding protein 1                        |
| Hs.379912.1.9   | chr6:170511638:170510750  | 170511555 | c | NM_005618    | 8  | CDS  | 28514  | DLL1     | delta-like 1 (Drosophila)                                              |
| Hs.380250.1.22  | chr1:155832463:155834541  | 155832657 | c | NM_005531    | 8  | CDS  | 3428   | IFI16    | interferon, gamma-inducible protein 16                                 |
| Hs.380271.1.15  | chr3:9773501:9782492      | 9773660   | c | NM_016821    | 6  | CDS  | 4968   | OGG1     | 8-oxoguanine DNA glycosylase                                           |
| Hs.380325.1.22  | chr11:49170920:49164898   | 49170885  | c | NM_004476    | 4  | CDS  | 2346   | FOLH1    | folate hydrolase (prostate-specific membrane antigen) 1                |
| Hs.380710.1.12  | chr17:31130004:31124522   | 31129622  | c | NM_024302    | 3  | CDS  | 79148  | MMP28    | matrix metalloproteinase 28                                            |

|                |                          |           |   |              |    |      |        |          |                                                                                |
|----------------|--------------------------|-----------|---|--------------|----|------|--------|----------|--------------------------------------------------------------------------------|
| Hs.380740.1.3  | chr8:37911748:37911163   | 37911665  | c | NM_152413    | 8  | CDS  | 137362 | MGC33309 | hypothetical protein MGC33309                                                  |
| Hs.380923.1.23 | chr19:52611720:52610171  | 52610965  | c | NM_001009813 | 4  | CDS  | 56917  | MEIS3    | Meis1, myeloid ecotropic viral integration site 1 homolog 3 (mouse)            |
| Hs.380953.1.6  | chr17:69711925:69716920  | 69712327  | c | NM_000999    | 3  | CDS  | 6169   | RPL38    | ribosomal protein L38                                                          |
| Hs.381219.1.5  | chr3:23935742:23938092   | 23936144  | c | BC081565     | 4  | CDS  | 6138   | RPL15    | ribosomal protein L15                                                          |
| Hs.381225.1.10 | chr19:11119493:11118966  | 11119277  | c | NM_182513    | 4  | CDS  | 147841 | SPBC24   | spindle pole body component 24 homolog (S. cerevisiae)                         |
| Hs.381225.1.12 | chr19:11119493:11118966  | 11119409  | c | NM_182513    | 4  | CDS  | 147841 | SPBC24   | spindle pole body component 24 homolog (S. cerevisiae)                         |
| Hs.381870.1.6  | chr11:65391907:65391127  | 65391709  | c | NM_016938    | 10 | CDS  | 30008  | EFEMP2   | EGF-containing fibulin-like extracellular matrix protein 2                     |
| Hs.382168.1.1  | chr20:45564171:45645333  | 45566609  | c | NM_006534    | 1  | 5UTR | 8202   | NCOA3    | nuclear receptor coactivator 3                                                 |
| Hs.382176.1.16 | chr13:40724780:40712570  | 40724418  | c | NM_004294    | 5  | CDS  | 9617   | MTRF1    | mitochondrial translational release factor 1                                   |
| Hs.383396.1.29 | chr11:4104640:4104840    | 4104753   | c | NM_001033    | 13 | CDS  | 6240   | RPM1     | ribonucleotide reductase M1 polypeptide                                        |
| Hs.385861.1.18 | chr7:22956885:22964925   | 22957359  | c | NM_018846    | 7  | CDS  | 55975  | KLHL7    | kelch-like 7 (Drosophila)                                                      |
| Hs.385861.1.8  | chr7:22938032:22953627   | 22938061  | c | NM_018846    | 5  | CDS  | 55975  | KLHL7    | kelch-like 7 (Drosophila)                                                      |
| Hs.386225.1.17 | chr19:54165614:54164925  | 54165352  | c | NM_002103    | 14 | CDS  | 2997   | GYS1     | glycogen synthase 1 (muscle)                                                   |
| Hs.386324.1.15 | chr7:98740989:98736906   | 98740369  | c | NM_032164    | 2  | CDS  | 84124  | ZNF394   | zinc finger protein 394                                                        |
| Hs.386324.1.17 | chr7:98740989:98736906   | 98740758  | c | NM_032164    | 2  | CDS  | 84124  | ZNF394   | zinc finger protein 394                                                        |
| Hs.386390.1.4  | chr3:9800711:9797234     | 9799812   | c | NM_006354    | 8  | CDS  | 10474  | TADA3L   | transcriptional adaptor 3 (NGG1 homolog, yeast)-like                           |
| Hs.386434.1.7  | chr10:74808674:74805982  | 74808263  | c | NM_001156    | 12 | CDS  | 310    | ANXA7    | annexin A7                                                                     |
| Hs.386684.1.14 | chr6:135681349:135665649 | 135681265 | c | AK024085     | 13 | CDS  | 54806  | AHI1     | Abelson helper integration site                                                |
| Hs.386684.1.18 | chr6:135757606:135750865 | 135757488 | c | AJ459825     | 22 | CDS  | 54806  | AHI1     | Abelson helper integration site                                                |
| Hs.386684.1.46 | chr6:135853453:135830466 | 135853291 | c | NM_017651    | 4  | CDS  | 54806  | AHI1     | Abelson helper integration site                                                |
| Hs.386866.1.1  | chr3:61709697:61950338   | 61711752  | c | NM_002841    | 2  | CDS  | 5793   | PTPRG    | protein tyrosine phosphatase, receptor type, G                                 |
| Hs.386866.1.12 | chr3:62164665:62179564   | 62164969  | c | NM_002841    | 12 | CDS  | 5793   | PTPRG    | protein tyrosine phosphatase, receptor type, G                                 |
| Hs.387207.1.9  | chr5:156117294:156118805 | 156117644 | c | NM_000337    | 8  | CDS  | 6444   | SGCD     | sarcoglycan, delta (35kDa dystrophin-associated glycoprotein)                  |
| Hs.387255.1.34 | chr16:4811381:4807700    | 4811206   | c | NM_032569    | 9  | CDS  | 84656  | N-PAC    | cytokine-like nuclear factor n-pac                                             |
| Hs.387336.1.7  | chr12:98935841:98934002  | 98935655  | c | NM_015054    | 20 | CDS  | 23074  | KIAA0701 | KIAA0701 protein                                                               |
| Hs.387381.1.18 | chr12:47710329:47709527  | 47709894  | c | NM_003482    | 42 | CDS  | 8085   | MLL2     | myeloid/lymphoid or mixed-lineage leukemia 2                                   |
| Hs.387755.1.2  | chr6:5053784:5049184     | 5053660   | c | AF258559     | 1  | CDS  | 57128  | C6orf149 | chromosome 6 open reading frame 149                                            |
| Hs.387804.1.7  | chr8:101785700:101784764 | 101785518 | c | NM_002568    | 14 | 3UTR | 26986  | PABPC1   | poly(A) binding protein, cytoplasmic 1                                         |
| Hs.387804.1.8  | chr8:101785700:101784764 | 101785631 | c | NM_002568    | 14 | 3UTR | 26986  | PABPC1   | poly(A) binding protein, cytoplasmic 1                                         |
| Hs.388170.1.32 | chr17:2183600:2183169    | 2183434   | c | NM_018128    | 6  | CDS  | 55720  | FLJ10534 | hypothetical protein FLJ10534                                                  |
| Hs.388245.1.3  | chr4:174822893:174821259 | 174822488 | c | NM_021973    | 2  | 3UTR | 9464   | HAND2    | heart and neural crest derivatives expressed 2                                 |
| Hs.388297.1.11 | chr8:126263681:126438642 | 126263996 | c | NM_173685    | 5  | CDS  | 286053 | C8orf36  | chromosome 8 open reading frame 36                                             |
| Hs.388297.1.9  | chr8:126263681:126438642 | 126263789 | c | NM_173685    | 5  | CDS  | 286053 | C8orf36  | chromosome 8 open reading frame 36                                             |
| Hs.3887.1.33   | chr2:231829070:231836458 | 231829289 | c | NM_002807    | 17 | CDS  | 5707   | PSMD1    | proteasome (prosome, macropain) 26S subunit, non-ATPase, 1                     |
| Hs.389037.1.32 | chr21:46495870:46491229  | 46495857  | c | NM_003906    | 20 | CDS  | 8888   | MCM3AP   | MCM3 minichromosome maintenance deficient 3 (S. cerevisiae) associated protein |
| Hs.389181.1.10 | chr15:41719813:41719289  | 41719490  | c | NM_054020    | 5  | CDS  | 117155 | CATSPER2 | cation channel, sperm associated 2                                             |
| Hs.389181.1.11 | chr15:41719813:41719289  | 41719716  | c | NM_054020    | 5  | CDS  | 117155 | CATSPER2 | cation channel, sperm associated 2                                             |
| Hs.389181.1.18 | chr15:41727406:41726958  | 41727259  | c | NM_054020    | 2  | CDS  | 117155 | CATSPER2 | cation channel, sperm associated 2                                             |
| Hs.389374.1.3  | chr1:157831851:157831219 | 157831653 | c | NM_181720    | 12 | CDS  | 257106 | ARHGAP30 | Rho GTPase activating protein 30                                               |
| Hs.389438.1.34 | chr16:1547936:1516799    | 1547830   | c | NM_014714    | 17 | CDS  | 9742   | WDTC2    | WD and tetra-tryptophan repeats 2                                              |
| Hs.390171.1.16 | chr6:33262381:33261534   | 33262203  | c | NM_080680    | 5  | CDS  | 1302   | COL11A2  | collagen, type XI, alpha 2                                                     |
| Hs.390395.1.15 | chr8:82777758:82777656   | 82777705  | c | NM_024699    | 7  | CDS  | 79752  | ZFAND1   | zinc finger, AN1-type domain 1                                                 |
| Hs.395482.1.61 | chr8:141958751:141943681 | 141958447 | c | NM_005607    | 4  | CDS  | 5747   | PTK2     | PTK2 protein tyrosine kinase 2                                                 |
| Hs.396358.1.8  | chr7:12043305:12043927   | 12043373  | c | NM_018374    | 7  | CDS  | 54664  | FLJ11273 | hypothetical protein FLJ11273                                                  |
| Hs.396530.1.22 | chr7:81026086:81019088   | 81024867  | c | NM_000601    | 5  | CDS  | 3082   | HGF      | hepatocyte growth factor (hepapoietin A; scatter factor)                       |



|                |                           |           |   |              |    |      |        |           |                                                                                                 |
|----------------|---------------------------|-----------|---|--------------|----|------|--------|-----------|-------------------------------------------------------------------------------------------------|
| Hs.397073.1.8  | chr7:73761744:73766333    | 73761771  | c | NM_174930    | 5  | CDS  | 5383   | PMS2L5    | postmeiotic segregation increased 2-like 5                                                      |
| Hs.397465.1.7  | chr7:138725817:138717290  | 138725524 | c | NM_022740    | 11 | CDS  | 28996  | HIPK2     | homeodomain interacting protein kinase 2                                                        |
| Hs.397978.1.21 | chr18:17498076:17493303   | 17497924  | c | NM_138340    | 5  | CDS  | 171586 | ABHD3     | abhydrolase domain containing 3                                                                 |
| Hs.397978.1.22 | chr18:17498076:17493303   | 17497952  | c | NM_138340    | 5  | CDS  | 171586 | ABHD3     | abhydrolase domain containing 3                                                                 |
| Hs.398091.1.1  | chr19:44530870:44534296   | 44531226  | c | NM_018028    | 2  | 5UTR | 55095  | FLJ10211  | hypothetical protein FLJ10211                                                                   |
| Hs.4.1.28      | chr4:100592155:100589992  | 100591840 | c | NM_000668    | 6  | CDS  | 125    | ADH1B     | alcohol dehydrogenase IB (class I), beta polypeptide                                            |
| Hs.400295.1.6  | chr8:99126346:99124180    | 99125800  | c | NM_000989    | 3  | CDS  | 6156   | RPL30     | ribosomal protein L30                                                                           |
| Hs.400740.1.12 | chr9:128979526:128984277  | 128979944 | c | NM_021131    | 9  | CDS  | 5524   | PPP2R4    | protein phosphatase 2A, regulatory subunit B' (PR 53)                                           |
| Hs.400802.1.10 | chr14:64059874:64068331   | 64060427  | c | NM_014950    | 2  | CDS  | 22890  | ZBTB1     | zinc finger and BTB domain containing 1                                                         |
| Hs.400802.1.9  | chr14:64059874:64068331   | 64060369  | c | NM_014950    | 2  | CDS  | 22890  | ZBTB1     | zinc finger and BTB domain containing 1                                                         |
| Hs.401013.1.7  | chr6:346778:350017        | 347623    | c | NM_002460    | 7  | CDS  | 3662   | IRF4      | interferon regulatory factor 4                                                                  |
| Hs.402752.1.2  | chr17:31160694:31168832   | 31162648  | c | NM_003487    | 1  | CDS  | 8148   | TAF15     | TAF15 RNA polymerase II, TATA box binding protein (TBP)-associated factor, 68kDa                |
| Hs.402752.1.3  | chr17:31160694:31168832   | 31162701  | c | NM_003487    | 1  | CDS  | 8148   | TAF15     | TAF15 RNA polymerase II, TATA box binding protein (TBP)-associated factor, 68kDa                |
| Hs.403171.1.30 | chr6:52452545:52462896    | 52452896  | c | NM_018100    | 9  | CDS  | 114327 | EFHC1     | EF-hand domain (C-terminal) containing 1                                                        |
| Hs.403201.1.3  | chr2:39329096:39326502    | 39329026  | c | NM_001009565 | 5  | CDS  | 344387 | CDKL4     | cyclin-dependent kinase-like 4                                                                  |
| Hs.403594.1.6  | chr8:16983621:16987115    | 16983847  | c | NM_181723    | 5  | CDS  | 286097 | EFHA2     | EF-hand domain family, member A2                                                                |
| Hs.404102.1.13 | chr7:20541319:20551845    | 20542105  | c | NM_178559    | 14 | CDS  | 340273 | ABCB5     | ATP-binding cassette, sub-family B (MDR/TAP), member 5                                          |
| Hs.404423.1.10 | chr15:57138042:57146254   | 57138175  | c | NM_017610    | 5  | CDS  | 54778  | RNF111    | ring finger protein 111                                                                         |
| Hs.404423.1.6  | chr15:57111194:57131795   | 57111229  | c | NM_017610    | 2  | CDS  | 54778  | RNF111    | ring finger protein 111                                                                         |
| Hs.4045.1.3    | chr18:32719634:32793268   | 32720365  | c | NM_020776    | 5  | CDS  | 57536  | KIAA1328  | KIAA1328                                                                                        |
| Hs.404568.1.33 | chr10:100179319:100177012 | 100178898 | c | NM_000195    | 10 | CDS  | 3257   | HPS1      | Hermansky-Pudlak syndrome 1                                                                     |
| Hs.404568.1.34 | chr10:100179319:100177012 | 100178968 | c | NM_000195    | 10 | CDS  | 3257   | HPS1      | Hermansky-Pudlak syndrome 1                                                                     |
| Hs.404568.1.35 | chr10:100179319:100177012 | 100179009 | c | NM_000195    | 10 | CDS  | 3257   | HPS1      | Hermansky-Pudlak syndrome 1                                                                     |
| Hs.404914.1.14 | chr2:9618512:9616972      | 9618228   | c | NM_003183    | 5  | CDS  | 6868   | ADAM17    | a disintegrin and metalloproteinase domain 17 (tumor necrosis factor, alpha, converting enzyme) |
| Hs.405153.1.18 | chr7:30269576:30268168    | 30269053  | c | NM_006092    | 5  | CDS  | 10392  | CARD4     | caspase recruitment domain family, member 4                                                     |
| Hs.405467.1.13 | chr4:178647853:178649610  | 178648163 | c | NM_018248    | 7  | CDS  | 55247  | NEIL3     | nei endonuclease VIII-like 3 (E. coli)                                                          |
| Hs.405537.1.20 | chr2:179133500:179131939  | 179133455 | c | NM_003690    | 5  | CDS  | 8575   | PRKRA     | protein kinase, interferon-inducible double stranded RNA dependent activator                    |
| Hs.405659.1.15 | chr12:129380749:129380906 | 129380803 | c | NM_004764    | 20 | CDS  | 9271   | PIWIL1    | piwi-like 1 (Drosophila)                                                                        |
| Hs.405755.1.4  | chr19:54134771:54137508   | 54135089  | c | NM_014475    | 4  | CDS  | 27294  | DHDH      | dihydrodiol dehydrogenase (dimeric)                                                             |
| Hs.405809.1.7  | chr15:82662625:82660633   | 82662511  | c | NM_203426    | 6  | 3UTR | 388152 | LOC388152 | hypothetical protein FLJ90297                                                                   |
| Hs.406335.1.8  | chr5:14743418:14745962    | 14743474  | c | NM_138348    | 4  | CDS  | 90268  | LOC90268  | hypothetical protein BC007706                                                                   |
| Hs.406557.1.30 | chr5:177982862:177978386  | 177981420 | c | NM_020666    | 2  | CDS  | 57396  | CLK4      | CDC-like kinase 4                                                                               |
| Hs.406678.1.22 | chr4:186064618:186063060  | 186064334 | c | NM_001995    | 12 | CDS  | 2180   | ACSL1     | acyl-CoA synthetase long-chain family member 1                                                  |
| Hs.406708.1.6  | chr19:59539923:59537049   | 59539855  | c | NM_012276    | 6  | CDS  | 23547  | LILRA4    | leukocyte immunoglobulin-like receptor, subfamily A (with TM domain), member 4                  |
| Hs.406787.1.12 | chr11:33725251:33720207   | 33722809  | c | NM_012175    | 10 | CDS  | 26273  | FBXO3     | F-box protein 3                                                                                 |
| Hs.406787.1.14 | chr11:33725251:33720207   | 33724882  | c | NM_012175    | 10 | CDS  | 26273  | FBXO3     | F-box protein 3                                                                                 |
| Hs.406890.1.24 | chr9:98625789:98624411    | 98625406  | c | NM_173551    | 4  | CDS  | 203286 | SAMD6     | sterile alpha motif domain containing 6                                                         |
| Hs.406890.1.28 | chr9:98631940:98626714    | 98631441  | c | NM_173551    | 2  | CDS  | 203286 | SAMD6     | sterile alpha motif domain containing 6                                                         |
| Hs.407368.1.23 | chr19:39404484:39410109   | 39404524  | c | NM_015578    | 9  | CDS  | 26065  | FAM61A    | family with sequence similarity 61, member A                                                    |
| Hs.407580.1.22 | chr2:159316310:159322646  | 159317024 | c | NM_001005476 | 9  | CDS  | 8502   | PKP4      | plakophilin 4                                                                                   |
| Hs.407580.1.52 | chr2:159358887:159360599  | 159359149 | c | NM_003628    | 20 | CDS  | 8502   | PKP4      | plakophilin 4                                                                                   |
| Hs.407926.1.20 | chr5:39017725:39014510    | 39016739  | c | NM_152756    | 8  | CDS  | 253260 | AVO3      | TORC2-specific protein AVO3                                                                     |
| Hs.407955.1.1  | chr17:70520563:70524767   | 70520917  | c | NM_001545    | 1  | CDS  | 3396   | ICT1      | immature colon carcinoma transcript 1                                                           |
| Hs.407955.1.2  | chr17:70520563:70524767   | 70520987  | c | NM_001545    | 1  | CDS  | 3396   | ICT1      | immature colon carcinoma transcript 1                                                           |

|                |                           |           |   |              |    |      |        |              |                                                                                                                |
|----------------|---------------------------|-----------|---|--------------|----|------|--------|--------------|----------------------------------------------------------------------------------------------------------------|
| Hs.408241.1.12 | chr7:23000006:23008697    | 23000251  | c | NM_007342    | 3  | CDS  | 11097  | NUPL2        | nucleoporin like 2                                                                                             |
| Hs.408241.1.20 | chr7:23010090:23012316    | 23010143  | c | BC005327     | 6  | CDS  | 11097  | NUPL2        | nucleoporin like 2                                                                                             |
| Hs.408451.1.29 | chr19:8518919:8516621     | 8518738   | c | NM_012335    | 12 | CDS  | 4542   | MYO1F        | myosin IF                                                                                                      |
| Hs.408451.1.39 | chr19:8524022:8523049     | 8523518   | c | NM_012335    | 6  | CDS  | 4542   | MYO1F        | myosin IF                                                                                                      |
| Hs.408458.1.18 | chr16:68500255:68509112   | 68501812  | c | NM_007014    | 9  | CDS  | 11060  | WWP2         | WW domain containing E3 ubiquitin protein ligase 2                                                             |
| Hs.408461.1.27 | chr11:118161970:118157104 | 118161926 | c | NM_004397    | 2  | CDS  | 1656   | DDX6         | DEAD (Asp-Glu-Ala-Asp) box polypeptide 6                                                                       |
| Hs.408843.1.14 | chr17:53640253:53639579   | 53639921  | c | NM_017777    | 11 | CDS  | 54903  | FLJ20345     | hypothetical protein FLJ20345                                                                                  |
| Hs.408903.1.10 | chr6:32010056:32011678    | 32010814  | c | NM_000063    | 6  | CDS  | 717    | C2           | complement component 2                                                                                         |
| Hs.409137.1.9  | chr14:74541357:74542321   | 74541397  | c | NM_014239    | 4  | CDS  | 8892   | EIF2B2       | eukaryotic translation initiation factor 2B, subunit 2 beta, 39kDa                                             |
| Hs.409140.1.13 | chr21:34209901:34208675   | 34209461  | c | NM_001697    | 1  | CDS  | 539    | ATP5O        | ATP synthase, H+ transporting, mitochondrial F1 complex, O subunit (oligomycin sensitivity conferring protein) |
| Hs.409523.1.3  | chr12:6754976:6756690     | 6755160   | c | NM_002286    | 5  | CDS  | 3902   | LAG3         | lymphocyte-activation gene 3                                                                                   |
| Hs.409662.1.11 | chr8:121348304:121351454  | 121348412 | c | NM_021110    | 25 | CDS  | 7373   | COL14A1      | collagen, type XIV, alpha 1 (undulin)                                                                          |
| Hs.409876.1.8  | chr6:109908970:109904827  | 109908845 | c | NM_014797    | 2  | CDS  | 9841   | ZBTB24       | zinc finger and BTB domain containing 24                                                                       |
| Hs.409960.1.12 | chr3:143371864:143367311  | 143371772 | c | NM_152776    | 16 | 3UTR | 256356 | MGC40579     | hypothetical protein MGC40579                                                                                  |
| Hs.409960.1.2  | chr3:143367177:143365363  | 143365452 | c | NM_152776    | 17 | 3UTR | 256356 | MGC40579     | hypothetical protein MGC40579                                                                                  |
| Hs.409960.1.6  | chr3:143367177:143365363  | 143366228 | c | NM_152776    | 17 | 3UTR | 256356 | MGC40579     | hypothetical protein MGC40579                                                                                  |
| Hs.410104.1.18 | chr12:50599167:50600809   | 50599393  | c | NM_000020    | 9  | CDS  | 94     | ACVRL1       | activin A receptor type II-like 1                                                                              |
| Hs.410231.1.14 | chr14:75709722:75712718   | 75710148  | c | NM_017926    | 5  | CDS  | 55668  | C14orf118    | chromosome 14 open reading frame 118                                                                           |
| Hs.410231.1.20 | chr14:75732069:75737786   | 75732525  | c | NM_017926    | 9  | CDS  | 55668  | C14orf118    | chromosome 14 open reading frame 118                                                                           |
| Hs.410378.1.16 | chr2:179168512:179167448  | 179168313 | c | NM_016105    | 1  | CDS  | 51661  | FKBP7        | FK506 binding protein 7                                                                                        |
| Hs.410388.1.10 | chr15:61208903:61220531   | 61209079  | c | NM_032857    | 5  | CDS  | 114294 | LACTB        | lactamase, beta                                                                                                |
| Hs.410477.1.12 | chr2:160628818:160627101  | 160628736 | c | NM_007366    | 27 | CDS  | 22925  | PLA2R1       | phospholipase A2 receptor 1, 180kDa                                                                            |
| Hs.410477.1.23 | chr2:160658085:160652231  | 160658058 | c | NM_001007267 | 17 | CDS  | 22925  | PLA2R1       | phospholipase A2 receptor 1, 180kDa                                                                            |
| Hs.410477.1.9  | chr2:160628818:160627101  | 160627833 | c | NM_007366    | 27 | CDS  | 22925  | PLA2R1       | phospholipase A2 receptor 1, 180kDa                                                                            |
| Hs.410596.1.21 | chr17:59020332:59025296   | 59020713  | c | NM_001003725 | 7  | 3UTR | 10238  | WDR68        | WD repeat domain 68                                                                                            |
| Hs.410596.1.22 | chr17:59020332:59025296   | 59020782  | c | NM_001003725 | 7  | 3UTR | 10238  | WDR68        | WD repeat domain 68                                                                                            |
| Hs.410810.1.18 | chr5:170602430:170625289  | 170602673 | c | NM_022897    | 23 | CDS  | 64901  | RANBP17      | RAN binding protein 17                                                                                         |
| Hs.410889.1.12 | chr17:58830008:58836214   | 58830379  | c | AJ278120     | 3  | CDS  | 26115  | DKFZP564D166 | putative ankyrin-repeat containing protein                                                                     |
| Hs.411300.1.16 | chr13:40548374:40552781   | 40548374  | c | NM_007187    | 8  | CDS  | 11193  | WBP4         | WW domain binding protein 4 (formin binding protein 21)                                                        |
| Hs.411300.1.2  | chr13:40534853:40537151   | 40535209  | c | NM_007187    | 2  | CDS  | 11193  | WBP4         | WW domain binding protein 4 (formin binding protein 21)                                                        |
| Hs.411312.1.8  | chr17:39808484:39808006   | 39808241  | c | NM_000419    | 26 | CDS  | 3674   | ITGA2B       | integrin, alpha 2b (platelet glycoprotein IIb of IIb/IIIa complex, antigen CD41B)                              |
| Hs.412102.1.14 | chr15:38053243:38055906   | 38054917  | c | NM_001013703 | 11 | CDS  | 440275 | EIF2AK4      | eukaryotic translation initiation factor 2 alpha kinase 4                                                      |
| Hs.412117.1.7  | chr5:150463323:150461262  | 150463111 | c | NM_001155    | 25 | CDS  | 309    | ANXA6        | annexin A6                                                                                                     |
| Hs.412136.1.2  | chr10:17490250:17491325   | 17490286  | c | AK127982     | 3  | CDS  | NA     | NA           | NA                                                                                                             |
| Hs.412186.1.16 | chr3:53880298:53879213    | 53880225  | c | NM_022899    | 11 | CDS  | 93973  | ACTR8        | ARP8 actin-related protein 8 homolog (yeast)                                                                   |
| Hs.412355.1.3  | chr19:18850738:18842429   | 18849725  | c | NM_001492    | 6  | 5UTR | 10715  | LASS1        | LAG1 longevity assurance homolog 1 (S. cerevisiae)                                                             |
| Hs.412462.1.12 | chr2:136214035:136223019  | 136214041 | c | NM_015361    | 7  | CDS  | 23518  | R3HDM        | R3H domain (binds single-stranded nucleic acids) containing                                                    |
| Hs.412462.1.7  | chr2:136196319:136212795  | 136196526 | c | D21852       | 3  | CDS  | 23518  | R3HDM        | R3H domain (binds single-stranded nucleic acids) containing                                                    |
| Hs.412484.1.17 | chr12:10215867:10213042   | 10215074  | c | NM_002543    | 1  | CDS  | 4973   | OLR1         | oxidised low density lipoprotein (lectin-like) receptor 1                                                      |
| Hs.412586.1.40 | chr3:137653572:137644945  | 137653469 | c | NM_005862    | 14 | CDS  | 10274  | STAG1        | stromal antigen 1                                                                                              |
| Hs.412587.1.6  | chr17:54127550:54135555   | 54127589  | c | NM_058217    | 2  | CDS  | 5889   | RAD51C       | RAD51 homolog C (S. cerevisiae)                                                                                |
| Hs.412587.1.7  | chr17:54127550:54135555   | 54127693  | c | NM_058217    | 2  | CDS  | 5889   | RAD51C       | RAD51 homolog C (S. cerevisiae)                                                                                |

|                |                           |           |   |              |    |     |        |           |                                                                                                  |
|----------------|---------------------------|-----------|---|--------------|----|-----|--------|-----------|--------------------------------------------------------------------------------------------------|
| Hs.413045.1.17 | chr1:176737882:176741929  | 176737897 | c | NM_014810    | 17 | CDS | 9857   | CAP350    | centrosome-associated protein 350                                                                |
| Hs.413493.1.9  | chr6:30405527:30406536    | 30405841  | c | NM_021253    | 3  | CDS | 56658  | TRIM39    | tripartite motif-containing 39                                                                   |
| Hs.413513.1.1  | chr8:42248881:42265308    | 42249104  | c | NM_001556    | 2  | CDS | 3551   | IKBKB     | inhibitor of kappa light polypeptide gene enhancer in B-cells, kinase beta                       |
| Hs.413513.1.31 | chr8:42305890:42307588    | 42305967  | c | NM_001556    | 21 | CDS | 3551   | IKBKB     | inhibitor of kappa light polypeptide gene enhancer in B-cells, kinase beta                       |
| Hs.413525.1.4  | chr16:79714756:79712820   | 79714124  | c | NM_052892    | 37 | CDS | 114780 | PKD1L2    | polycystic kidney disease 1-like 2                                                               |
| Hs.414332.1.11 | chr12:111887834:111895820 | 111889330 | c | NM_002535    | 2  | CDS | 4939   | OAS2      | 2'-5'-oligoadenylate synthetase 2, 69/71kDa                                                      |
| Hs.414332.1.26 | chr12:111909766:111910898 | 111910630 | c | NM_016817    | 11 | CDS | 4939   | OAS2      | 2'-5'-oligoadenylate synthetase 2, 69/71kDa                                                      |
| Hs.414614.1.12 | chr16:23290706:23294559   | 23291005  | c | NM_000336    | 7  | CDS | 6338   | SCNN1B    | sodium channel, nonvoltage-gated 1, beta (Liddle syndrome)                                       |
| Hs.414614.1.8  | chr16:23271897:23274120   | 23272066  | c | NM_000336    | 3  | CDS | 6338   | SCNN1B    | sodium channel, nonvoltage-gated 1, beta (Liddle syndrome)                                       |
| Hs.414952.1.27 | chr2:63623388:63578657    | 63623138  | c | NM_015910    | 6  | CDS | 51057  | LOC51057  | hypothetical protein LOC51057                                                                    |
| Hs.415342.1.9  | chr16:88479876:88481560   | 88480039  | c | NM_014972    | 4  | CDS | 22980  | KIAA1049  | KIAA1049 protein                                                                                 |
| Hs.415414.1.16 | chrX:55055634:55053330    | 55055354  | c | NM_138362    | 3  | CDS | 90736  | CXorf44   | chromosome X open reading frame 44                                                               |
| Hs.415950.1.8  | chr1:154307141:154304156  | 154306838 | c | NM_031281    | 10 | CDS | 83416  | FCRL5     | Fc receptor-like 5                                                                               |
| Hs.417022.1.14 | chr6:52988839:52986740    | 52988305  | c | NM_014920    | 8  | CDS | 22858  | ICK       | intestinal cell (MAK-like) kinase                                                                |
| Hs.417029.1.9  | chr17:7098847:7100899     | 7098949   | c | NM_015362    | 5  | CDS | 23587  | DERP6     | S-phase 2 protein                                                                                |
| Hs.417549.1.1  | chr20:48560535:48611306   | 48561176  | c | NM_002827    | 1  | CDS | 5770   | PTPN1     | protein tyrosine phosphatase, non-receptor type 1                                                |
| Hs.417549.1.14 | chr20:48628574:48629111   | 48628731  | c | NM_002827    | 6  | CDS | 5770   | PTPN1     | protein tyrosine phosphatase, non-receptor type 1                                                |
| Hs.418291.1.1  | chr21:33560690:33562568   | 33561015  | c | NM_000628    | 1  | CDS | 3588   | IL10RB    | interleukin 10 receptor, beta                                                                    |
| Hs.418581.1.6  | chr2:191187952:191190246  | 191188227 | c | NM_017694    | 5  | CDS | 54842  | FLJ20160  | FLJ20160 protein                                                                                 |
| Hs.420036.1.4  | chr2:171511651:171512966  | 171511889 | c | NM_000817    | 4  | CDS | 2571   | GAD1      | glutamate decarboxylase 1 (brain, 67kDa)                                                         |
| Hs.420076.1.22 | chr8:56837747:56831525    | 56835886  | c | NM_152417    | 3  | CDS | 137695 | TMEM68    | transmembrane protein 68                                                                         |
| Hs.420076.1.23 | chr8:56837747:56831525    | 56837317  | c | NM_152417    | 3  | CDS | 137695 | TMEM68    | transmembrane protein 68                                                                         |
| Hs.420076.1.25 | chr8:56837747:56831525    | 56837441  | c | NM_152417    | 3  | CDS | 137695 | TMEM68    | transmembrane protein 68                                                                         |
| Hs.420272.1.12 | chr5:134716534:134709647  | 134716191 | c | NM_004893    | 6  | CDS | 9555   | H2AFY     | H2A histone family, member Y                                                                     |
| Hs.420662.1.12 | chr11:111446971:111446636 | 111446927 | c | NM_138789    | 3  | CDS | 120379 | LOC120379 | hypothetical protein BC019238                                                                    |
| Hs.420696.1.2  | chr21:25883017:25881973   | 25882935  | c | NM_080794    | 9  | CDS | 54148  | MRPL39    | mitochondrial ribosomal protein L39                                                              |
| Hs.420757.1.23 | chr1:214181519:214175940  | 214181479 | c | NM_018040    | 2  | CDS | 55105  | GPATC2    | G patch domain containing 2                                                                      |
| Hs.421194.1.15 | chr7:65261693:65265961    | 65262055  | c | NM_003596    | 4  | CDS | 8460   | TPST1     | tyrosylprotein sulfotransferase 1                                                                |
| Hs.421340.1.2  | chr9:132697574:132632476  | 132697302 | c | NM_152572    | 11 | CDS | 158067 | C9orf98   | chromosome 9 open reading frame 98                                                               |
| Hs.421848.1.22 | chr10:102736495:102733822 | 102736023 | c | NM_176794    | 3  | CDS | 84545  | MRPL43    | mitochondrial ribosomal protein L43                                                              |
| Hs.422662.1.18 | chr14:96396826:96412119   | 96397012  | c | NM_003384    | 11 | CDS | 7443   | VRK1      | vaccinia related kinase 1                                                                        |
| Hs.42400.1.13  | chr13:26562019:26547526   | 26561575  | c | NM_182488    | 7  | CDS | 219333 | USP12     | ubiquitin specific protease 12                                                                   |
| Hs.424484.1.33 | chr14:104793899:104789962 | 104793570 | c | NM_001519    | 4  | CDS | 2972   | BRF1      | BRF1 homolog, subunit of RNA polymerase III transcription initiation factor IIIB (S. cerevisiae) |
| Hs.424980.1.9  | chr13:46367630:46364727   | 46367441  | c | NM_000621    | 1  | CDS | 3356   | HTR2A     | 5-hydroxytryptamine (serotonin) receptor 2A                                                      |
| Hs.425104.1.23 | chr2:175804924:175804344  | 175804728 | c | NM_001880    | 8  | CDS | 1386   | ATF2      | activating transcription factor 2                                                                |
| Hs.425125.1.8  | chr3:52004097:52003183    | 52003915  | c | NM_000992    | 3  | CDS | 6159   | RPL29     | ribosomal protein L29                                                                            |
| Hs.426296.1.4  | chr10:73653821:73660129   | 73653918  | c | NM_173473    | 2  | CDS | 119504 | C10orf104 | chromosome 10 open reading frame 104                                                             |
| Hs.42644.1.17  | chr10:131867675:131868366 | 131867922 | c | NM_006541    | 11 | UTR | 10539  | TXNL2     | thioredoxin-like 2                                                                               |
| Hs.426734.1.8  | chr7:34977691:34974947    | 34977206  | c | BC066987     | 5  | CDS | 554236 | DPY19L2P1 | dpy-19-like 2 pseudogene 1 (C. elegans)                                                          |
| Hs.428147.1.8  | chr6:110637120:110638602  | 110637212 | c | NM_015891    | 5  | CDS | 51362  | CDC40     | cell division cycle 40 homolog (yeast)                                                           |
| Hs.429018.1.12 | chr6:34137647:34134884    | 34137266  | c | NM_000841    | 3  | CDS | 2914   | GRM4      | glutamate receptor, metabotropic 4                                                               |
| Hs.429294.1.29 | chr9:104703514:104700535  | 104703274 | c | NM_005502    | 6  | CDS | 19     | ABCA1     | ATP-binding cassette, sub-family A (ABC1), member 1                                              |
| Hs.429596.1.19 | chr3:166275020:166269686  | 166274915 | c | NM_001041    | 3  | CDS | 6476   | SI        | sucrase-isomaltase (alpha-glucosidase)                                                           |
| Hs.430425.1.22 | chr1:1788997:1781477      | 1788589   | c | NM_002074    | 3  | CDS | 2782   | GNB1      | guanine nucleotide binding protein (G protein), beta polypeptide 1                               |
| Hs.430646.1.22 | chr6:100113093:100106493  | 100112798 | c | NM_001013399 | 5  | CDS | 892    | CCNC      | cyclin C                                                                                         |

|                |                           |           |   |              |    |      |        |           |                                                                 |
|----------------|---------------------------|-----------|---|--------------|----|------|--------|-----------|-----------------------------------------------------------------|
| Hs.431009.1.2  | chr8:106870329:106880127  | 106870431 | c | NM_012082    | 6  | CDS  | 23414  | ZFPM2     | zinc finger protein, multitype 2                                |
| Hs.431048.1.1  | chr9:130619397:130759004  | 130619522 | c | NM_007313    | 1  | CDS  | 25     | ABL1      | v-abl Abelson murine leukemia viral oncogene homolog 1          |
| Hs.431081.1.1  | chr4:120518662:120524094  | 120518856 | c | NM_019050    | 1  | CDS  | 54532  | USP53     | ubiquitin specific protease 53                                  |
| Hs.431279.1.32 | chr17:42146536:42159098   | 42146851  | c | NM_006178    | 15 | CDS  | 4905   | NSF       | N-ethylmaleimide-sensitive factor                               |
| Hs.431367.1.13 | chr6:142561446:142566814  | 142561607 | c | NM_016485    | 6  | CDS  | 51534  | C6orf55   | chromosome 6 open reading frame 55                              |
| Hs.431400.1.1  | chr5:34724111:34793329    | 34724145  | c | AY317139     | 4  | CDS  | 26064  | RAI14     | retinoic acid induced 14                                        |
| Hs.431400.1.6  | chr5:34793461:34831800    | 34793938  | c | NM_015577    | 3  | CDS  | 26064  | RAI14     | retinoic acid induced 14                                        |
| Hs.431498.1.46 | chr3:71431660:71330234    | 71431536  | c | NM_001012505 | 5  | 5UTR | 27086  | FOXP1     | forkhead box P1                                                 |
| Hs.431550.1.1  | chr2:101773519:101865699  | 101773783 | c | NM_004834    | 2  | CDS  | 9448   | MAP4K4    | mitogen-activated protein kinase kinase kinase kinase 4         |
| Hs.431550.1.30 | chr2:101942290:101944601  | 101942628 | c | AY212247     | 19 | CDS  | 9448   | MAP4K4    | mitogen-activated protein kinase kinase kinase kinase 4         |
| Hs.431550.1.53 | chr2:101957666:101960166  | 101957780 | c | NM_004834    | 25 | CDS  | 9448   | MAP4K4    | mitogen-activated protein kinase kinase kinase kinase 4         |
| Hs.431850.1.20 | chr22:20448037:20443084   | 20447883  | c | Z11695       | 8  | 3UTR | 5594   | MAPK1     | mitogen-activated protein kinase 1                              |
| Hs.43213.1.22  | chr3:181809301:181810119  | 181809387 | c | NM_133462    | 11 | CDS  | 151613 | TTC14     | tetratricopeptide repeat domain 14                              |
| Hs.43213.1.28  | chr3:181810494:181817869  | 181811466 | c | AY358762     | 12 | CDS  | 151613 | TTC14     | tetratricopeptide repeat domain 14                              |
| Hs.432364.1.12 | chr9:95770702:95783290    | 95770954  | c | NM_001010895 | 11 | CDS  | 375748 | LOC375748 | RAD26L hypothetical protein                                     |
| Hs.432453.1.10 | chr10:30768210:30776716   | 30768405  | c | NM_005204    | 3  | CDS  | 1326   | MAP3K8    | mitogen-activated protein kinase kinase kinase 8                |
| Hs.432453.1.7  | chr10:30768210:30776716   | 30768225  | c | NM_005204    | 3  | CDS  | 1326   | MAP3K8    | mitogen-activated protein kinase kinase kinase 8                |
| Hs.432491.1.7  | chr13:46249591:46243633   | 46249239  | c | NM_001984    | 9  | CDS  | 2098   | ESD       | esterase D/formylglutathione hydrolase                          |
| Hs.432562.1.18 | chr2:24355464:24352534    | 24354839  | c | NM_006277    | 30 | CDS  | 50618  | ITSN2     | intersectin 2                                                   |
| Hs.432674.1.33 | chr5:145502627:145500018  | 145502538 | c | NM_020117    | 20 | CDS  | 51520  | LARS      | leucyl-tRNA synthetase                                          |
| Hs.432674.1.38 | chr5:145503167:145502841  | 145503000 | c | NM_020117    | 19 | CDS  | 51520  | LARS      | leucyl-tRNA synthetase                                          |
| Hs.432706.1.12 | chr2:197790045:197780263  | 197789899 | c | NM_153697    | 10 | CDS  | 91526  | ANKRD44   | ankyrin repeat domain 44                                        |
| Hs.432706.1.8  | chr2:197768932:197715498  | 197768042 | c | NM_153697    | 16 | CDS  | 91526  | ANKRD44   | ankyrin repeat domain 44                                        |
| Hs.432948.1.13 | chr7:103402871:103401284  | 103402575 | c | NM_002553    | 9  | CDS  | 5001   | ORC5L     | origin recognition complex, subunit 5-like (yeast)              |
| Hs.433060.1.27 | chr3:133558398:133569245  | 133559426 | c | BC007460     | 10 | CDS  | 55     | ACPP      | acid phosphatase, prostate                                      |
| Hs.433060.1.31 | chr3:133558398:133569245  | 133560302 | c | BC007460     | 10 | CDS  | 55     | ACPP      | acid phosphatase, prostate                                      |
| Hs.433062.1.2  | chr6:73990142:73983084    | 73989988  | c | NM_030568    | 7  | 3UTR | 80759  | C6orf148  | chromosome 6 open reading frame 148                             |
| Hs.433213.1.8  | chr7:127722167:127727808  | 127722306 | c | NM_018396    | 4  | CDS  | 55798  | METTL2    | methyltransferase like 2                                        |
| Hs.433222.1.5  | chr14:74017157:74016745   | 74016942  | c | NM_006432    | 4  | CDS  | 10577  | NPC2      | Niemann-Pick disease, type C2                                   |
| Hs.433332.1.2  | chr4:101159542:101159306  | 101159433 | c | NM_021970    | 7  | 3UTR | 8649   | MAP2K1IP1 | mitogen-activated protein kinase kinase 1 interacting protein 1 |
| Hs.433343.1.25 | chr16:2750502:2751562     | 2750623   | c | NM_016333    | 10 | CDS  | 23524  | SRRM2     | serine/arginine repetitive matrix 2                             |
| Hs.433343.1.26 | chr16:2750502:2751562     | 2750848   | c | NM_016333    | 10 | CDS  | 23524  | SRRM2     | serine/arginine repetitive matrix 2                             |
| Hs.433439.1.9  | chr2:86349395:86351206    | 86349599  | c | NM_145644    | 4  | CDS  | 51318  | MRPL35    | mitochondrial ribosomal protein L35                             |
| Hs.433702.1.23 | chr14:102875424:102875728 | 102875713 | c | NM_001969    | 9  | CDS  | 1983   | EIF5      | eukaryotic translation initiation factor 5                      |
| Hs.433732.1.22 | chr2:201551466:201550445  | 201551278 | c | NM_004071    | 3  | CDS  | 1195   | CLK1      | CDC-like kinase 1                                               |
| Hs.433738.1.11 | chr20:32902245:32901525   | 32902092  | c | NM_178026    | 14 | 3UTR | 2686   | GGTL3     | gamma-glutamyltransferase-like 3                                |
| Hs.433738.1.9  | chr20:32901424:32896956   | 32901160  | c | NM_052830    | 14 | CDS  | 2686   | GGTL3     | gamma-glutamyltransferase-like 3                                |
| Hs.433795.1.34 | chr1:151755580:151754998  | 151755348 | c | NM_003029    | 2  | CDS  | 6464   | SHC1      | SHC (Src homology 2 domain containing) transforming protein 1   |
| Hs.434251.1.14 | chr10:99115854:99113651   | 99115637  | c | NM_015179    | 29 | CDS  | 23223  | KIAA0690  | KIAA0690                                                        |
| Hs.434253.1.5  | chr9:94615006:94634601    | 94615092  | c | NM_032823    | 3  | CDS  | 84909  | C9orf3    | chromosome 9 open reading frame 3                               |
| Hs.434255.1.27 | chr8:18769463:18706689    | 18769364  | c | NM_015310    | 4  | CDS  | 23362  | PSD3      | pleckstrin and Sec7 domain containing 3                         |
| Hs.434286.1.26 | chr14:88948030:88886906   | 88947941  | c | NM_005197    | 2  | CDS  | 1112   | CHES1     | checkpoint suppressor 1                                         |
| Hs.434289.1.17 | chr5:102923642:102923069  | 102923114 | c | NM_031438    | 2  | CDS  | 83594  | NUDT12    | nudix (nucleoside diphosphate linked moiety X)-type motif 12    |
| Hs.434367.1.10 | chr12:103215301:103215714 | 103215301 | c | NM_003330    | 6  | CDS  | 7296   | TXNRD1    | thioredoxin reductase 1                                         |

|                |                           |           |   |              |    |      |        |          |                                                                                                                                 |
|----------------|---------------------------|-----------|---|--------------|----|------|--------|----------|---------------------------------------------------------------------------------------------------------------------------------|
| Hs.434435.1.21 | chr3:127354984:127352073  | 127352651 | c | NM_012190    | 7  | CDS  | 10840  | ALDH1L1  | aldehyde dehydrogenase 1 family, member L1                                                                                      |
| Hs.434494.1.11 | chr6:158446470:158450697  | 158446872 | c | NM_003898    | 6  | CDS  | 8871   | SYNJ2    | synaptojanin 2                                                                                                                  |
| Hs.434494.1.17 | chr6:158458077:158460087  | 158458231 | c | NM_003898    | 12 | CDS  | 8871   | SYNJ2    | synaptojanin 2                                                                                                                  |
| Hs.434878.1.43 | chr20:61797652:61798556   | 61798042  | c | NM_032957    | 35 | CDS  | 51750  | RTEL1    | regulator of telomere elongation helicase 1                                                                                     |
| Hs.434966.1.34 | chr8:38236823:38237274    | 38236929  | c | NM_015214    | 17 | 3UTR | 23259  | DDHD2    | DDHD domain containing 2                                                                                                        |
| Hs.434980.1.22 | chr21:26291545:26276662   | 26291374  | c | NM_000484    | 8  | CDS  | 351    | APP      | amyloid beta (A4) precursor protein (protease nexin-II, Alzheimer disease)                                                      |
| Hs.435004.1.18 | chr10:121653780:121658542 | 121654161 | c | NM_007190    | 4  | CDS  | 11196  | SEC23IP  | SEC23 interacting protein                                                                                                       |
| Hs.435004.1.45 | chr10:121683290:121690087 | 121683340 | c | NM_007190    | 18 | 3UTR | 11196  | SEC23IP  | SEC23 interacting protein                                                                                                       |
| Hs.435023.1.18 | chr2:241212320:241188917  | 241212149 | c | NM_016552    | 3  | CDS  | 51281  | ANKMY1   | ankyrin repeat and MYND domain containing 1                                                                                     |
| Hs.435103.1.28 | chr3:143620043:143618770  | 143619385 | c | NM_019001    | 12 | CDS  | 54464  | XRN1     | 5'-3' exoribonuclease 1                                                                                                         |
| Hs.435120.1.12 | chr17:4847709:4847869     | 4847727   | c | NM_006612    | 9  | CDS  | 10749  | KIF1C    | kinesin family member 1C                                                                                                        |
| Hs.435237.1.13 | chr5:60235231:60234093    | 60234944  | c | NM_000082    | 6  | CDS  | 1161   | ERCC8    | excision repair cross-complementing rodent repair deficiency, complementation group 8                                           |
| Hs.435237.1.15 | chr5:60235231:60234093    | 60235164  | c | NM_000082    | 6  | CDS  | 1161   | ERCC8    | excision repair cross-complementing rodent repair deficiency, complementation group 8                                           |
| Hs.435237.1.6  | chr5:60222472:60219105    | 60222135  | c | NM_000082    | 10 | CDS  | 1161   | ERCC8    | excision repair cross-complementing rodent repair deficiency, complementation group 8                                           |
| Hs.435302.1.15 | chr7:99317408:99314487    | 99317103  | c | NM_017715    | 3  | CDS  | 7551   | ZNF3     | zinc finger protein 3 (A8-51)                                                                                                   |
| Hs.435381.1.13 | chr9:17356716:17378159    | 17356758  | c | NM_017738    | 8  | CDS  | 54875  | C9orf39  | chromosome 9 open reading frame 39                                                                                              |
| Hs.435398.1.5  | chr16:88252331:88263194   | 88255417  | c | NM_153025    | 2  | CDS  | 124045 | C16orf55 | chromosome 16 open reading frame 55                                                                                             |
| Hs.435561.1.1  | chr11:107600809:107603531 | 107601190 | c | NM_000051    | 2  | 5UTR | 472    | ATM      | ataxia telangiectasia mutated (includes complementation groups A, C and D)                                                      |
| Hs.435561.1.23 | chr11:107670997:107673223 | 107671938 | c | NM_000051    | 33 | CDS  | 472    | ATM      | ataxia telangiectasia mutated (includes complementation groups A, C and D)                                                      |
| Hs.435561.1.5  | chr11:107605261:107611606 | 107605301 | c | NM_000051    | 5  | CDS  | 472    | ATM      | ataxia telangiectasia mutated (includes complementation groups A, C and D)                                                      |
| Hs.435561.1.9  | chr11:107611772:107619889 | 107611914 | c | NM_000051    | 6  | CDS  | 472    | ATM      | ataxia telangiectasia mutated (includes complementation groups A, C and D)                                                      |
| Hs.435611.1.4  | chr19:12728110:12729464   | 12728520  | c | NM_017682    | 8  | CDS  | 54831  | VMD2L1   | vitelliform macular dystrophy 2-like 1                                                                                          |
| Hs.435655.1.18 | chr9:92316460:92312619    | 92315951  | c | NM_017680    | 2  | CDS  | 54829  | ASPEN    | asporin (LRR class 1)                                                                                                           |
| Hs.435700.1.5  | chr1:151123094:151126402  | 151123395 | c | NM_020452    | 12 | CDS  | 57198  | ATP8B2   | ATPase, Class I, type 8B, member 2                                                                                              |
| Hs.435711.1.9  | chr4:154554888:154571738  | 154555024 | c | NM_015271    | 3  | CDS  | 23321  | TRIM2    | tripartite motif-containing 2                                                                                                   |
| Hs.435741.1.38 | chr1:164746124:164764516  | 164746671 | c | NM_001017977 | 14 | CDS  | 55827  | IQWD1    | IQ motif and WD repeats 1                                                                                                       |
| Hs.435742.1.11 | chr5:34904876:34916042    | 34905711  | c | NM_144725    | 8  | CDS  | 153657 | FLJ25439 | hypothetical protein FLJ25439                                                                                                   |
| Hs.435767.1.19 | chr3:197457128:197454917  | 197456841 | c | NM_005017    | 8  | CDS  | 5130   | PCYT1A   | phosphate cytidyltransferase 1, choline, alpha isoform                                                                          |
| Hs.435767.1.20 | chr3:197457128:197454917  | 197456886 | c | NM_005017    | 8  | CDS  | 5130   | PCYT1A   | phosphate cytidyltransferase 1, choline, alpha isoform                                                                          |
| Hs.435771.1.28 | chr11:43314121:43320558   | 43314354  | c | NM_006595    | 13 | CDS  | 8539   | API5     | apoptosis inhibitor 5                                                                                                           |
| Hs.435815.1.28 | chr13:36496171:36494218   | 36495702  | c | NM_001014286 | 19 | CDS  | 55578  | FAM48A   | family with sequence similarity 48, member A                                                                                    |
| Hs.435845.1.5  | chr14:76018856:76027542   | 76019214  | c | NM_004452    | 7  | CDS  | 2103   | ESRRB    | estrogen-related receptor beta                                                                                                  |
| Hs.435947.1.1  | chr1:110596933:110600971  | 110597354 | c | AK022541     | 1  | CDS  | 64783  | RBM15    | RNA binding motif protein 15                                                                                                    |
| Hs.435981.1.6  | chr19:50608774:50604824   | 50608534  | c | NM_001983    | 9  | CDS  | 2067   | ERCC1    | excision repair cross-complementing rodent repair deficiency, complementation group 1 (includes overlapping antisense sequence) |
| Hs.435991.1.14 | chr4:113545477:113546903  | 113545592 | c | NM_018569    | 9  | CDS  | 55435  | C4orf16  | chromosome 4 open reading frame 16                                                                                              |
| Hs.436031.1.15 | chr15:76552779:76555584   | 76553219  | c | NM_004136    | 8  | CDS  | 3658   | IREB2    | iron-responsive element binding protein 2                                                                                       |
| Hs.436040.1.20 | chr16:82193701:82261895   | 82193824  | c | NM_001257    | 8  | CDS  | 1012   | CDH13    | cadherin 13, H-cadherin (heart)                                                                                                 |
| Hs.436062.1.31 | chr3:81774621:81725865    | 81774412  | c | NM_000158    | 7  | CDS  | 2632   | GBE1     | glucan (1,4-alpha-), branching enzyme 1 (glycogen branching enzyme, Andersen disease, glycogen storage disease type IV)         |
| Hs.436113.1.15 | chr14:103274768:103273951 | 103274554 | c | NM_015316    | 14 | CDS  | 23368  | PPP1R13B | protein phosphatase 1, regulatory (inhibitor) subunit 13B                                                                       |

|                |                           |           |   |              |    |      |        |          |                                                                                                                                        |
|----------------|---------------------------|-----------|---|--------------|----|------|--------|----------|----------------------------------------------------------------------------------------------------------------------------------------|
| Hs.436142.1.17 | chr4:88037406:88041058    | 88037536  | c | NM_006264    | 22 | CDS  | 5783   | PTPN13   | protein tyrosine phosphatase, non-receptor type 13 (APO-1/CD95 (Fas)-associated phosphatase)                                           |
| Hs.436142.1.4  | chr4:87980134:87994861    | 87980213  | c | NM_006264    | 7  | CDS  | 5783   | PTPN13   | protein tyrosine phosphatase, non-receptor type 13 (APO-1/CD95 (Fas)-associated phosphatase)                                           |
| Hs.436146.1.4  | chr7:1388766:1397260      | 1388939   | c | AB067495     | 3  | 5UTR | 114796 | KIAA1908 | KIAA1908 protein                                                                                                                       |
| Hs.436186.1.25 | chr5:96147247:96145541    | 96147147  | c | NM_016442    | 13 | CDS  | 51752  | ARTS-1   | type 1 tumor necrosis factor receptor shedding aminopeptidase regulator                                                                |
| Hs.436186.1.5  | chr5:96137863:96124689    | 96135944  | c | NM_016442    | 19 | CDS  | 51752  | ARTS-1   | type 1 tumor necrosis factor receptor shedding aminopeptidase regulator                                                                |
| Hs.436186.1.6  | chr5:96137863:96124689    | 96137503  | c | NM_016442    | 19 | CDS  | 51752  | ARTS-1   | type 1 tumor necrosis factor receptor shedding aminopeptidase regulator                                                                |
| Hs.436186.1.7  | chr5:96137863:96124689    | 96137583  | c | NM_016442    | 19 | CDS  | 51752  | ARTS-1   | type 1 tumor necrosis factor receptor shedding aminopeptidase regulator                                                                |
| Hs.436299.1.1  | chr9:127659177:127659591  | 127659563 | c | AK057719     | 1  | 3UTR | NA     | NA       | NA                                                                                                                                     |
| Hs.436306.1.4  | chr2:228681220:228672082  | 228681053 | c | NM_030623    | 10 | CDS  | 80309  | SKIP     | SPHK1 (sphingosine kinase type 1) interacting protein                                                                                  |
| Hs.436367.1.21 | chr18:19733418:19735088   | 19733658  | c | NM_000227    | 10 | CDS  | 3909   | LAMA3    | laminin, alpha 3                                                                                                                       |
| Hs.436367.1.45 | chr18:19765164:19766121   | 19765500  | c | NM_000227    | 28 | CDS  | 3909   | LAMA3    | laminin, alpha 3                                                                                                                       |
| Hs.436380.1.12 | chr14:46412997:46412545   | 46412872  | c | NM_182830    | 13 | CDS  | 161357 | MAMDC1   | MAM domain containing 1                                                                                                                |
| Hs.436380.1.9  | chr14:46412385:46394108   | 46412290  | c | NM_182830    | 14 | CDS  | 161357 | MAMDC1   | MAM domain containing 1                                                                                                                |
| Hs.436385.1.10 | chr6:160640658:160638742  | 160640609 | c | NM_003058    | 4  | CDS  | 6582   | SLC22A2  | solute carrier family 22 (organic cation transporter), member 2                                                                        |
| Hs.436410.1.1  | chr11:123998340:124000036 | 123998578 | c | NM_032811    | 1  | 5UTR | 84897  | TBRG1    | transforming growth factor beta regulator 1                                                                                            |
| Hs.436445.1.9  | chr8:91002574:91005905    | 91002721  | c | NM_004337    | 5  | CDS  | 734    | C8orf1   | chromosome 8 open reading frame 1                                                                                                      |
| Hs.436527.1.36 | chr2:112347115:112346521  | 112346580 | c | NM_022662    | 5  | CDS  | 64682  | ANAPC1   | anaphase promoting complex subunit 1                                                                                                   |
| Hs.436538.1.1  | chr3:25445384:25477687    | 25445480  | c | NM_000965    | 1  | CDS  | 5915   | RARB     | retinoic acid receptor, beta                                                                                                           |
| Hs.436590.1.3  | chr6:39936772:39940186    | 39936922  | c | NM_015345    | 3  | CDS  | 23500  | DAAM2    | dishevelled associated activator of morphogenesis 2                                                                                    |
| Hs.436657.1.10 | chr8:27513213:27512070    | 27512856  | c | NM_001831    | 7  | CDS  | 1191   | CLU      | clusterin (complement lysis inhibitor, SP-40,40, sulfated glycoprotein 2, testosterone-repressed prostate message 2, apolipoprotein J) |
| Hs.436680.1.5  | chr17:58967162:58969157   | 58967306  | c | NM_030779    | 6  | CDS  | 81033  | KCNH6    | potassium voltage-gated channel, subfamily H (eag-related), member 6                                                                   |
| Hs.436705.1.24 | chr20:36594917:36597130   | 36594996  | c | NM_020336    | 15 | CDS  | 57148  | KIAA1219 | KIAA1219 protein                                                                                                                       |
| Hs.436975.1.7  | chr4:56149526:56145633    | 56149373  | c | NM_004898    | 21 | CDS  | 9575   | CLOCK    | clock homolog (mouse)                                                                                                                  |
| Hs.436977.1.10 | chr6:159143472:159148651  | 159143732 | c | NM_001009991 | 11 | CDS  | 94120  | SYTL3    | synaptotagmin-like 3                                                                                                                   |
| Hs.436980.1.12 | chr17:70362427:70360346   | 70361260  | c | NM_000835    | 2  | CDS  | 2905   | GRIN2C   | glutamate receptor, ionotropic, N-methyl D-aspartate 2C                                                                                |
| Hs.436980.1.5  | chr17:70352009:70351288   | 70351766  | c | NM_000835    | 12 | CDS  | 2905   | GRIN2C   | glutamate receptor, ionotropic, N-methyl D-aspartate 2C                                                                                |
| Hs.437153.1.15 | chr12:121143415:121144650 | 121143574 | c | NM_014938    | 8  | CDS  | 22877  | MONDOA   | Mlx interactor                                                                                                                         |
| Hs.437179.1.15 | chr8:38243941:38242987    | 38243657  | c | NM_032483    | 5  | CDS  | 84513  | PPAPDC1B | phosphatidic acid phosphatase type 2 domain containing 1B                                                                              |
| Hs.437241.1.14 | chr4:47404021:47406525    | 47404135  | c | NM_020453    | 14 | CDS  | 57205  | ATP10D   | ATPase, Class V, type 10D                                                                                                              |
| Hs.437241.1.9  | chr4:47389808:47397670    | 47390509  | c | NM_020453    | 10 | CDS  | 57205  | ATP10D   | ATPase, Class V, type 10D                                                                                                              |
| Hs.437249.1.3  | chr17:63815448:63851339   | 63815899  | c | NM_014960    | 1  | CDS  | 22901  | KIAA1001 | Arylsulfatase G                                                                                                                        |
| Hs.437388.1.18 | chr20:43483638:43486269   | 43483844  | c | NM_015937    | 9  | CDS  | 51604  | PIGT     | phosphatidylinositol glycan, class T                                                                                                   |
| Hs.437388.1.21 | chr20:43486634:43487627   | 43486792  | c | NM_015937    | 11 | CDS  | 51604  | PIGT     | phosphatidylinositol glycan, class T                                                                                                   |
| Hs.437549.1.12 | chr17:38545827:38550270   | 38545868  | c | NM_005821    | 4  | 3UTR | 10230  | NBR2     | neighbor of BRCA1 gene 2                                                                                                               |
| Hs.437943.1.6  | chr9:93943589:93946111    | 93944005  | c | NM_152422    | 7  | CDS  | 138639 | PTPDC1   | protein tyrosine phosphatase domain containing 1                                                                                       |

|                |                           |           |   |              |    |      |        |           |                                                                               |
|----------------|---------------------------|-----------|---|--------------|----|------|--------|-----------|-------------------------------------------------------------------------------|
| Hs.438072.1.1  | chr7:645480:651675        | 645630    | c | NM_025154    | 1  | CDS  | 23353  | UNC84A    | unc-84 homolog A (C. elegans)                                                 |
| Hs.438072.1.13 | chr7:656399:662800        | 656690    | c | NM_025154    | 5  | CDS  | 23353  | UNC84A    | unc-84 homolog A (C. elegans)                                                 |
| Hs.438072.1.5  | chr7:651865:654823        | 652050    | c | NM_025154    | 2  | CDS  | 23353  | UNC84A    | unc-84 homolog A (C. elegans)                                                 |
| Hs.438336.1.23 | chr2:53953409:53953647    | 53953426  | c | NM_015701    | 12 | CDS  | 27248  | C2orf30   | chromosome 2 open reading frame 30                                            |
| Hs.438489.1.4  | chr14:49859188:49862076   | 49859363  | c | NM_001003805 | 3  | CDS  | 27109  | ATP5S     | ATP synthase, H+ transporting, mitochondrial F0 complex, subunit s (factor B) |
| Hs.438489.1.9  | chr14:49860585:49862076   | 49860759  | c | NM_001003803 | 4  | CDS  | 27109  | ATP5S     | ATP synthase, H+ transporting, mitochondrial F0 complex, subunit s (factor B) |
| Hs.438587.1.3  | chr22:20348806:20349408   | 20349123  | c | NM_014337    | 2  | CDS  | 23759  | PPIL2     | peptidylprolyl isomerase (cyclophilin)-like 2                                 |
| Hs.438794.1.17 | chr11:9763247:9762562     | 9763056   | c | NM_030962    | 37 | CDS  | 81846  | SBF2      | SET binding factor 2                                                          |
| Hs.438918.1.3  | chr12:50656627:50661019   | 50656930  | c | NM_004302    | 3  | CDS  | 91     | ACVR1B    | activin A receptor, type IB                                                   |
| Hs.439127.1.13 | chr5:80691477:80679506    | 80691427  | c | NM_130767    | 5  | CDS  | 134526 | CACH-1    | cytosolic acetyl-CoA hydrolase                                                |
| Hs.439381.1.27 | chr1:12343297:12343486    | 12343338  | c | NM_015378    | 45 | CDS  | 55187  | VPS13D    | vacuolar protein sorting 13D (yeast)                                          |
| Hs.439480.1.19 | chr3:50115604:50116684    | 50115688  | c | NM_005778    | 7  | CDS  | 10181  | RBM5      | RNA binding motif protein 5                                                   |
| Hs.439530.1.13 | chr12:4592146:4592941     | 4592310   | c | AF263541     | 11 | CDS  | 8798   | DYRK4     | dual-specificity tyrosine-(Y)-phosphorylation regulated kinase 4              |
| Hs.439620.1.46 | chr2:192106475:192114068  | 192106703 | c | NM_012223    | 28 | CDS  | 4430   | MYO1B     | myosin IB                                                                     |
| Hs.439645.1.27 | chr19:6714690:6711999     | 6714233   | c | NM_005490    | 2  | CDS  | 10045  | SH2D3A    | SH2 domain containing 3A                                                      |
| Hs.439726.1.12 | chr3:49135140:49134808    | 49134869  | c | NM_002292    | 27 | CDS  | 3913   | LAMB2     | laminin, beta 2 (laminin S)                                                   |
| Hs.439777.1.5  | chr22:49297908:49297655   | 49297666  | c | NM_152246    | 19 | 3UTR | 1375   | CPT1B     | carnitine palmitoyltransferase 1B (muscle)                                    |
| Hs.440049.1.14 | chr3:127661193:127643488  | 127660562 | c | NM_025112    | 7  | CDS  | 79364  | ZXDC      | ZXD family zinc finger C                                                      |
| Hs.440371.1.1  | chr1:100310893:100314458  | 100311040 | c | AK001149     | 1  | CDS  | 54482  | FLJ10287  | hypothetical protein FLJ10287                                                 |
| Hs.440379.1.27 | chr11:128361107:128357042 | 128360984 | c | NM_014715    | 5  | CDS  | 9743   | RICS      | Rho GTPase-activating protein                                                 |
| Hs.440379.1.33 | chr11:128373423:128363231 | 128373400 | c | NM_014715    | 2  | CDS  | 9743   | RICS      | Rho GTPase-activating protein                                                 |
| Hs.440475.1.14 | chr5:281449:283990        | 281514    | c | NM_004168    | 6  | CDS  | 6389   | SDHA      | succinate dehydrogenase complex, subunit A, flavoprotein (Fp)                 |
| Hs.440475.1.30 | chr5:304584:307507        | 304901    | c | NM_004168    | 13 | CDS  | 6389   | SDHA      | succinate dehydrogenase complex, subunit A, flavoprotein (Fp)                 |
| Hs.440508.1.7  | chr6:130538678:130517864  | 130538675 | c | NM_001017373 | 8  | CDS  | 154075 | SAMD3     | sterile alpha motif domain containing 3                                       |
| Hs.440534.1.18 | chr18:64509511:64505983   | 64509235  | c | NM_019022    | 9  | CDS  | 54495  | TXNDC10   | thioredoxin domain containing 10                                              |
| Hs.440534.1.20 | chr18:64515442:64509579   | 64515153  | c | NM_019022    | 8  | CDS  | 54495  | TXNDC10   | thioredoxin domain containing 10                                              |
| Hs.440776.1.15 | chr1:101191286:101179165  | 101191226 | c | NM_015958    | 4  | CDS  | 51611  | DPH5      | DPH5 homolog (S. cerevisiae)                                                  |
| Hs.440848.1.77 | chr12:6074886:6054979     | 6074704   | c | NM_000552    | 6  | CDS  | 7450   | VWF       | von Willebrand factor                                                         |
| Hs.440955.1.17 | chr2:182176226:182183557  | 182176588 | c | NM_000885    | 10 | CDS  | 3676   | ITGA4     | integrin, alpha 4 (antigen CD49D, alpha 4 subunit of VLA-4 receptor)          |
| Hs.440961.1.23 | chr5:96110074:96112046    | 96110177  | c | NM_001750    | 17 | CDS  | 831    | CAST      | calpastatin                                                                   |
| Hs.440961.1.25 | chr5:96112143:96115519    | 96112271  | c | NM_001750    | 18 | CDS  | 831    | CAST      | calpastatin                                                                   |
| Hs.440961.1.47 | chr5:96134348:96134727    | 96134513  | c | NM_173061    | 18 | 3UTR | 831    | CAST      | calpastatin                                                                   |
| Hs.440968.1.39 | chr15:41526855:41526081   | 41526645  | c | NM_005657    | 13 | CDS  | 7158   | TP53BP1   | tumor protein p53 binding protein, 1                                          |
| Hs.44102.1.4   | chr11:104475299:104468522 | 104474720 | c | NM_001007232 | 2  | CDS  | 440068 | INCA      | inhibitory caspase recruitment domain (CARD) protein                          |
| Hs.441378.1.26 | chr3:133820175:133806748  | 133819792 | c | NM_032169    | 11 | CDS  | 84129  | FLJ12592  | putative acyl-CoA dehydrogenase                                               |
| Hs.441378.1.27 | chr3:133820175:133806748  | 133820010 | c | NM_032169    | 11 | CDS  | 84129  | FLJ12592  | putative acyl-CoA dehydrogenase                                               |
| Hs.441550.1.18 | chr20:25232185:25230983   | 25231899  | c | NM_015600    | 12 | CDS  | 26090  | C20orf22  | chromosome 20 open reading frame 22                                           |
| Hs.441926.1.18 | chr13:72326295:72365922   | 72326819  | c | NM_006346    | 10 | CDS  | 10464  | C13orf24  | chromosome 13 open reading frame 24                                           |
| Hs.442138.1.44 | chr19:15408616:15399345   | 15408286  | c | AK131404     | 3  | CDS  | 58525  | WIZ       | widely-interspaced zinc finger motifs                                         |
| Hs.442182.1.12 | chr16:16223006:16221306   | 16222551  | c | NM_001171    | 2  | CDS  | 368    | ABCC6     | ATP-binding cassette, sub-family C (CFTR/MRP), member 6                       |
| Hs.442291.1.3  | chr4:3294554:3302580      | 3294986   | c | NM_001012982 | 3  | CDS  | 345222 | LOC345222 | hypothetical gene supported by BC043530                                       |
| Hs.442291.1.5  | chr4:3302758:3306455      | 3302809   | c | NM_001012982 | 4  | 3UTR | 345222 | LOC345222 | hypothetical gene supported by BC043530                                       |
| Hs.442592.1.16 | chr5:148865238:148856617  | 148864602 | c | AF218004     | 9  | CDS  | 1452   | CSNK1A1   | casein kinase 1, alpha 1                                                      |
| Hs.44269.1.12  | chr2:201260122:201261278  | 201260371 | c | NM_152524    | 6  | CDS  | 151246 | SGOL2     | shugoshin-like 2 (S. pombe)                                                   |
| Hs.442707.1.11 | chr8:74106923:74113904    | 74106924  | c | NM_003218    | 7  | CDS  | 7013   | TERF1     | telomeric repeat binding factor (NIMA-interacting) 1                          |

|                |                          |           |   |              |    |       |        |              |                                                                                  |
|----------------|--------------------------|-----------|---|--------------|----|-------|--------|--------------|----------------------------------------------------------------------------------|
| Hs.44277.1.7   | chr1:100335807:100333895 | 100335349 | c | NM_144620    | 6  | CDS   | 127495 | LRRC39       | leucine rich repeat containing 39                                                |
| Hs.442782.1.9  | chr14:22490603:22489460  | 22490556  | c | NM_017815    | 5  | CDS   | 54930  | C14orf94     | chromosome 14 open reading frame 94                                              |
| Hs.442892.1.2  | chrX:63334457:63331802   | 63334318  | c | NM_017677    | 11 | CDS   | 55613  | MTMR8        | myotubularin related protein 8                                                   |
| Hs.443031.1.32 | chr3:33085315:33084787   | 33085034  | c | NM_000404    | 3  | CDS   | 2720   | GLB1         | galactosidase, beta 1                                                            |
| Hs.443061.1.19 | chrX:110802204:110806960 | 110802539 | c | NM_024810    | 10 | CDS   | 79868  | CXorf45      | chromosome X open reading frame 45                                               |
| Hs.443077.1.41 | chr2:99513580:99510922   | 99513548  | c | NM_016316    | 6  | CDS   | 51455  | REV1L        | REV1-like (yeast)                                                                |
| Hs.443081.1.17 | chr3:9397303:9399882     | 9397316   | c | NM_015453    | 7  | CDS   | 25917  | THUMPD3      | THUMP domain containing 3                                                        |
| Hs.443169.1.9  | chr7:92482543:92471575   | 92482493  | c | NM_198151    | 3  | CDS   | 253012 | LOC253012    | hypothetical protein LOC253012                                                   |
| Hs.443428.1.32 | chr14:23873539:23872035  | 23873257  | c | NM_139247    | 1  | CDS   | 196883 | ADCY4        | adenylate cyclase 4                                                              |
| Hs.443481.1.13 | chr2:68273484:68270229   | 68272873  | c | NM_138458    | 7  | CDS   | 116143 | LOC116143    | hypothetical protein BC014022                                                    |
| Hs.443490.1.3  | chrX:21621094:21622945   | 21621237  | c | NM_015884    | 2  | CDS   | 51360  | MBTPS2       | membrane-bound transcription factor protease, site 2                             |
| Hs.443551.1.5  | chr1:166505040:166506802 | 166505185 | c | NM_018186    | 6  | CDS   | 55732  | C1orf112     | chromosome 1 open reading frame 112                                              |
| Hs.443625.1.75 | chr2:189698375:189699155 | 189698619 | c | NM_000090    | 47 | CDS   | 1281   | COL3A1       | collagen, type III, alpha 1 (Ehlers-Danlos syndrome type IV, autosomal dominant) |
| Hs.443681.1.12 | chr5:82843972:82868581   | 82844505  | c | X15998       | 6  | CDS   | 1462   | CSPG2        | chondroitin sulfate proteoglycan 2 (versican)                                    |
| Hs.443687.1.16 | chr2:105461335:105448709 | 105460872 | c | NM_001450    | 2  | CDS   | 2274   | FHL2         | four and a half LIM domains 2                                                    |
| Hs.443789.1.16 | chr6:119374172:119369473 | 119374041 | c | NM_024581    | 6  | CDS   | 79632  | C6orf60      | chromosome 6 open reading frame 60                                               |
| Hs.443976.1.13 | chr20:33521226:33523288  | 33521371  | c | NM_007186    | 11 | CDS   | 11190  | CEP2         | centrosomal protein 2                                                            |
| Hs.444028.1.14 | chr13:51937602:51940413  | 51937943  | c | NM_018204    | 6  | CDS   | 26586  | CKAP2        | cytoskeleton associated protein 2                                                |
| Hs.444157.1.15 | chr12:41079064:41121383  | 41079494  | c | NM_016488    | 9  | CDS   | 51535  | PPHLN1       | periphrin 1                                                                      |
| Hs.444157.1.23 | chr12:41121499:41122709  | 41122025  | c | NM_016488    | 10 | CDS   | 51535  | PPHLN1       | periphrin 1                                                                      |
| Hs.444200.1.1  | chr17:63252916:63280517  | 63252321  | c | NM_004459    | 1  | CDS   | 2186   | FALZ         | fetal Alzheimer antigen                                                          |
| Hs.444200.1.67 | chr17:63386454:63390789  | 63386641  | c | NM_004459    | 26 | CDS   | 2186   | FALZ         | fetal Alzheimer antigen                                                          |
| Hs.444200.1.69 | chr17:63386454:63390789  | 63386953  | c | NM_004459    | 26 | CDS   | 2186   | FALZ         | fetal Alzheimer antigen                                                          |
| Hs.44424.1.13  | chr12:83780105:83772855  | 83777095  | c | NM_182767    | 5  | CDS   | 55117  | SLC6A15      | solute carrier family 6, member 15                                               |
| Hs.44424.1.15  | chr12:83780105:83772855  | 83779906  | c | NM_182767    | 5  | CDS   | 55117  | SLC6A15      | solute carrier family 6, member 15                                               |
| Hs.444240.1.5  | chr12:81861992:81863165  | 81862214  | c | NM_152588    | 6  | CDS   | 160335 | DKFZp762A217 | hypothetical protein DKFZp762A217                                                |
| Hs.444247.1.9  | chrX:130928133:130930631 | 130928192 | c | AF344883     | 5  | CDS   | 51765  | MASK         | Mst3 and SOK1-related kinase                                                     |
| Hs.444292.1.12 | chr6:97786022:97784001   | 97785655  | c | NM_198468    | 13 | CDS   | 253714 | C6orf167     | chromosome 6 open reading frame 167                                              |
| Hs.444329.1.6  | chr13:93280800:93477983  | 93280911  | c | NM_005708    | 3  | CDS   | 10082  | GPC6         | glypican 6                                                                       |
| Hs.444362.1.18 | chr3:189908884:18990602  | 189913332 | c | NM_005578    | 7  | CDS   | 4026   | LPP          | LIM domain containing preferred translocation partner in lipoma                  |
| Hs.444389.1.16 | chr8:23347774:23346613   | 23347409  | c | NM_004901    | 12 | CDS   | 9583   | ENTPD4       | ectonucleoside triphosphate diphosphohydrolase 4                                 |
| Hs.444403.1.8  | chr1:199138810:199141490 | 199139027 | c | NM_002481    | 10 | CDS   | 4660   | PPP1R12B     | protein phosphatase 1, regulatory (inhibitor) subunit 12B                        |
| Hs.444451.1.11 | chr2:173900071:173907349 | 173903056 | c | NM_016653    | 10 | CDS   | 51776  | ZAK          | sterile alpha motif and leucine zipper containing kinase AZK                     |
| Hs.444459.1.1  | chr9:69702448:69731307   | 69702649  | c | NM_001010940 | 4  | CDS   | 138255 | LOC138255    | OTTHUMP00000021439                                                               |
| Hs.444535.1.17 | chr15:65452826:65464327  | 65453040  | c | NM_022784    | 8  | CDS   | 64799  | FLJ12476     | hypothetical protein FLJ12476                                                    |
| Hs.444552.1.15 | chr11:60934985:60928753  | 60934629  | c | NM_024811    | 9  | 3'UTR | 79869  | FLJ12529     | pre-mRNA cleavage factor I, 59 kDa subunit                                       |
| Hs.444552.1.17 | chr11:60934985:60928753  | 60934923  | c | NM_024811    | 9  | 3'UTR | 79869  | FLJ12529     | pre-mRNA cleavage factor I, 59 kDa subunit                                       |
| Hs.444558.1.4  | chr8:136630326:136638872 | 136631407 | c | NM_006558    | 4  | CDS   | 10656  | KHDRBS3      | KH domain containing, RNA binding, signal transduction associated 3              |
| Hs.444600.1.32 | chr16:30213387:30213010  | 30213177  | c | BC063703     | 7  | 3'UTR | 81893  | LAT1-3TM     | LAT1-3TM protein                                                                 |
| Hs.444673.1.11 | chr5:1373730:1371569     | 1373466   | c | NM_030782    | 16 | CDS   | 81037  | CRR9         | cisplatin resistance related protein CRR9p                                       |
| Hs.444767.1.19 | chr8:29059813:29055740   | 29059294  | c | NM_015254    | 18 | CDS   | 23303  | KIF13B       | kinesin family member 13B                                                        |
| Hs.444842.1.1  | chr6:70646272:70665560   | 70646408  | c | NM_001858    | 2  | CDS   | 1310   | COL19A1      | collagen, type XIX, alpha 1                                                      |
| Hs.444870.1.26 | chr2:201648258:201647774 | 201648104 | c | NM_006190    | 3  | CDS   | 4999   | ORC2L        | origin recognition complex, subunit 2-like (yeast)                               |
| Hs.445030.1.28 | chr5:95150319:95154518   | 95150843  | c | NM_014899    | 11 | CDS   | 22836  | RHOBTB3      | Rho-related BTB domain containing 3                                              |
| Hs.445097.1.38 | chr16:30643905:30647787  | 30644192  | c | NM_006662    | 20 | CDS   | 10847  | SRCAP        | Snf2-related CBP activator protein                                               |
| Hs.445129.1.7  | chr12:32030159:32031439  | 32030326  | c | NM_018169    | 4  | CDS   | 55196  | FLJ10652     | hypothetical protein FLJ10652                                                    |



|                |                           |           |   |              |    |      |        |           |                                                                                                                |
|----------------|---------------------------|-----------|---|--------------|----|------|--------|-----------|----------------------------------------------------------------------------------------------------------------|
| Hs.445192.1.16 | chr4:104298359:104270474  | 104297984 | c | NM_139173    | 1  | 5UTR | 150159 | LOC150159 | CG10806-like                                                                                                   |
| Hs.445192.1.17 | chr4:104298359:104270474  | 104298081 | c | NM_139173    | 1  | 5UTR | 150159 | LOC150159 | CG10806-like                                                                                                   |
| Hs.445272.1.2  | chr3:121952538:121972264  | 121952593 | c | NM_005513    | 1  | CDS  | 2960   | GTF2E1    | general transcription factor IIE, polypeptide 1, alpha 56kDa                                                   |
| Hs.445402.1.5  | chr1:202224411:202225016  | 202224629 | c | NM_002596    | 3  | CDS  | 5129   | PCTK3     | PCTAIRE protein kinase 3                                                                                       |
| Hs.445497.1.20 | chr2:38720705:38716326    | 38719868  | c | NM_138394    | 6  | CDS  | 92906  | HNRPLL    | heterogeneous nuclear ribonucleoprotein L-like                                                                 |
| Hs.445748.1.16 | chr11:72231843:72231535   | 72231647  | c | NM_014824    | 15 | CDS  | 9873   | FCHSD2    | FCH and double SH3 domains 2                                                                                   |
| Hs.445827.1.55 | chr2:189775950:189775446  | 189775576 | c | NM_000393    | 10 | CDS  | 1290   | COL5A2    | collagen, type V, alpha 2                                                                                      |
| Hs.445885.1.41 | chr10:24873417:24873915   | 24873734  | c | NM_019590    | 19 | CDS  | 56243  | KIAA1217  | KIAA1217                                                                                                       |
| Hs.445885.1.46 | chr10:24874039:24874761   | 24874203  | c | NM_019590    | 20 | CDS  | 56243  | KIAA1217  | KIAA1217                                                                                                       |
| Hs.446240.1.48 | chr20:45338464:45324580   | 45338084  | c | NM_012408    | 11 | CDS  | 23613  | PRKCBP1   | protein kinase C binding protein 1                                                                             |
| Hs.446240.1.68 | chr20:45360879:45356931   | 45360295  | c | NM_012408    | 4  | CDS  | 23613  | PRKCBP1   | protein kinase C binding protein 1                                                                             |
| Hs.446270.1.54 | chr3:155515536:155512166  | 155515142 | c | NM_020865    | 3  | CDS  | 170506 | DHX36     | DEAH (Asp-Glu-Ala-His) box polypeptide 36                                                                      |
| Hs.446352.1.41 | chr17:35127260:35129565   | 35127422  | c | NM_001005862 | 18 | CDS  | 2064   | ERBB2     | v-erb-b2 erythroblastic leukemia viral oncogene homolog 2, neuro/glioblastoma derived oncogene homolog (avian) |
| Hs.446425.1.4  | chr2:114106752:114107959  | 114107702 | c | NM_007082    | 3  | CDS  | 11159  | RABL2A    | RAB, member of RAS oncogene family-like 2A                                                                     |
| Hs.446425.1.7  | chr2:114108040:114108857  | 114108418 | c | NM_007082    | 4  | CDS  | 11159  | RABL2A    | RAB, member of RAS oncogene family-like 2A                                                                     |
| Hs.446438.1.23 | chr17:69954733:69956556   | 69955325  | c | AK000249     | 4  | CDS  | 55890  | GPRC5C    | G protein-coupled receptor, family C, group 5, member C                                                        |
| Hs.446620.1.6  | chr19:62566884:62571723   | 62568485  | c | NM_173631    | 1  | 5UTR | 284306 | ZNF547    | zinc finger protein 547                                                                                        |
| Hs.446747.1.24 | chr16:28407412:28406564   | 28407146  | c | NM_000086    | 4  | CDS  | 1201   | CLN3      | ceroid-lipofuscinosis, neuronal 3, juvenile (Batten, Spielmeier-Vogt disease)                                  |
| Hs.447458.1.21 | chr10:102709244:102711623 | 102709337 | c | NM_018121    | 19 | CDS  | 55719  | C10orf6   | chromosome 10 open reading frame 6                                                                             |
| Hs.44766.1.1   | chrX:46452892:46469164    | 46454321  | c | NM_006915    | 1  | CDS  | 6102   | RP2       | retinitis pigmentosa 2 (X-linked recessive)                                                                    |
| Hs.44780.1.10  | chr2:144598480:144562062  | 144597052 | c | NM_001006636 | 7  | CDS  | 79712  | GTDC1     | glycosyltransferase-like domain containing 1                                                                   |
| Hs.44780.1.11  | chr2:144598480:144562062  | 144598404 | c | NM_001006636 | 7  | CDS  | 79712  | GTDC1     | glycosyltransferase-like domain containing 1                                                                   |
| Hs.448418.2.2  | chrY:19323116:19281879    | 19322719  | c | NM_001001877 | 1  | CDS  | 159119 | HSFY2     | heat shock transcription factor, Y linked 2                                                                    |
| Hs.448872.1.7  | chr17:33961647:33961152   | 33961441  | c | NM_025248    | 14 | CDS  | 80725  | SNIP      | SNAP25-interacting protein                                                                                     |
| Hs.449278.1.13 | chr5:923587:918697        | 923403    | c | NM_001009877 | 12 | CDS  | 65980  | BRD9      | bromodomain containing 9                                                                                       |
| Hs.44939.2.1   | chr10:128112377:128113620 | 128112545 | c | AK125527     | 2  | 5UTR | NA     | NA        | NA                                                                                                             |
| Hs.449601.1.14 | chr22:20986511:20987615   | 20986647  | c | NM_080926    | 5  | CDS  | 96610  | LOC96610  | hypothetical protein similar to KIAA0187 gene product                                                          |
| Hs.450105.1.1  | chr4:141803040:141804178  | 141803040 | c | NM_153702    | 1  | 5UTR | 255520 | ELMOD2    | ELMO domain containing 2                                                                                       |
| Hs.45056.1.8   | chr6:97669107:97682000    | 97669340  | c | NM_052904    | 7  | CDS  | 114792 | KIAA1900  | KIAA1900                                                                                                       |
| Hs.450763.1.4  | chr12:62723623:62742963   | 62723674  | c | NM_020762    | 6  | CDS  | 57522  | SRGAP1    | SLIT-ROBO Rho GTPase activating protein 1                                                                      |
| Hs.451846.1.12 | chr1:174647211:174645459  | 174646127 | c | NM_033127    | 14 | CDS  | 89866  | LZTR2     | leucine zipper transcription regulator 2                                                                       |
| Hs.453441.1.3  | chr6:66257207:66171982    | 66251099  | c | NM_198283    | 4  | CDS  | 346007 | EGFL11    | EGF-like-domain, multiple 11                                                                                   |
| Hs.453951.1.12 | chr8:32719794:32731431    | 32720112  | c | NM_013957    | 7  | CDS  | 3084   | NRG1      | neuregulin 1                                                                                                   |
| Hs.453951.1.14 | chr8:32719794:32731431    | 32720285  | c | NM_013957    | 7  | CDS  | 3084   | NRG1      | neuregulin 1                                                                                                   |
| Hs.453951.1.21 | chr8:32737467:32740807    | 32738044  | c | NM_013956    | 12 | CDS  | 3084   | NRG1      | neuregulin 1                                                                                                   |
| Hs.455089.1.6  | chr4:10132697:10124433    | 10131116  | c | NM_053042    | 2  | 5UTR | 85460  | KIAA1729  | KIAA1729 protein                                                                                               |
| Hs.456557.1.14 | chr1:44770928:44779462    | 44771128  | c | NM_018150    | 8  | CDS  | 55182  | C1orf164  | chromosome 1 open reading frame 164                                                                            |
| Hs.456557.1.15 | chr1:44770928:44779462    | 44771260  | c | NM_018150    | 8  | CDS  | 55182  | C1orf164  | chromosome 1 open reading frame 164                                                                            |
| Hs.458275.2.5  | chr7:73638420:73639776    | 73638420  | c | BC002816     | 4  | CDS  | NA     | NA        | NA                                                                                                             |
| Hs.458304.1.9  | chr3:125181902:125178519  | 125180212 | c | NM_017578    | 3  | CDS  | 54763  | ROPN1     | ropporin, rhopilin associated protein 1                                                                        |
| Hs.458312.1.5  | chr2:149061763:149074410  | 149062412 | c | NM_018328    | 4  | CDS  | 55777  | MBD5      | methyl-CpG binding domain protein 5                                                                            |
| Hs.458332.1.9  | chr17:77484473:77484131   | 77484191  | c | NM_153824    | 7  | CDS  | 5831   | PYCR1     | pyrroline-5-carboxylate reductase 1                                                                            |
| Hs.458713.1.13 | chr8:33430275:33371316    | 33429847  | c | AJ535839     | 3  | CDS  | 84750  | FUT10     | fucosyltransferase 10 (alpha (1,3) fucosyltransferase)                                                         |
| Hs.459035.1.6  | chr15:77064403:77060097   | 77064158  | c | NM_002891    | 24 | CDS  | 5923   | RASGRF1   | Ras protein-specific guanine nucleotide-releasing factor 1                                                     |
| Hs.459088.1.17 | chr15:79017376:79021244   | 79017590  | c | NM_018689    | 24 | CDS  | 57214  | KIAA1199  | KIAA1199                                                                                                       |

|                |                           |           |   |              |    |      |        |              |                                                                                                   |
|----------------|---------------------------|-----------|---|--------------|----|------|--------|--------------|---------------------------------------------------------------------------------------------------|
| Hs.459095.1.17 | chr15:79385942:79388000   | 79385944  | c | NM_004513    | 7  | CDS  | 3603   | IL16         | interleukin 16 (lymphocyte chemoattractant factor)                                                |
| Hs.459095.1.5  | chr15:79372296:79376323   | 79372340  | c | NM_172217    | 14 | CDS  | 3603   | IL16         | interleukin 16 (lymphocyte chemoattractant factor)                                                |
| Hs.459117.1.2  | chr15:80351199:80361514   | 80351490  | c | NM_001008226 | 2  | CDS  | 283726 | DKFZp666G057 | hypothetical protein DKFZp666G057                                                                 |
| Hs.459211.1.8  | chr15:83878116:83888006   | 83881233  | c | NM_006738    | 4  | CDS  | 11214  | AKAP13       | A kinase (PRKA) anchor protein 13                                                                 |
| Hs.459573.1.23 | chr15:100332080:100332738 | 100332244 | c | NM_199163    | 8  | 3UTR | 374666 | FLJ25222     | CXYorf1-related protein                                                                           |
| Hs.459573.1.4  | chr15:100323950:100330321 | 100325493 | c | NM_199163    | 2  | CDS  | 374666 | FLJ25222     | CXYorf1-related protein                                                                           |
| Hs.459715.1.26 | chr16:2930095:2938689     | 2930157   | c | NM_032296    | 9  | CDS  | 84256  | FLYWCH1      | FLYWCH-type zinc finger 1                                                                         |
| Hs.459759.1.27 | chr16:3729579:3728675     | 3729448   | c | NM_004380    | 26 | CDS  | 1387   | CREBBP       | CREB binding protein (Rubinstein-Taybi syndrome)                                                  |
| Hs.459759.1.55 | chr16:3763752:3760989     | 3763638   | c | NM_004380    | 14 | CDS  | 1387   | CREBBP       | CREB binding protein (Rubinstein-Taybi syndrome)                                                  |
| Hs.459759.1.56 | chr16:3763752:3760989     | 3763699   | c | NM_004380    | 14 | CDS  | 1387   | CREBBP       | CREB binding protein (Rubinstein-Taybi syndrome)                                                  |
| Hs.459779.1.6  | chr16:4427488:4431376     | 4427657   | c | NM_005147    | 3  | CDS  | 9093   | DNAJA3       | DnaJ (Hsp40) homolog, subfamily A, member 3                                                       |
| Hs.459790.1.13 | chr9:77182008:77183985    | 77183648  | c | NM_001018037 | 46 | CDS  | 23230  | VPS13A       | vacuolar protein sorting 13A (yeast)                                                              |
| Hs.459845.1.1  | chr10:1196578:1198486     | 1196931   | c | NM_001010910 | 2  | CDS  | 399706 | LOC399706    | hypothetical LOC399706                                                                            |
| Hs.460107.1.17 | chr16:15698219:15725548   | 15698285  | c | NM_017668    | 8  | CDS  | 54820  | NDE1         | nudE nuclear distribution gene E homolog 1 (A. nidulans)                                          |
| Hs.460124.1.11 | chr9:120711676:120711163  | 120711410 | c | NM_015651    | 5  | CDS  | 26147  | PHF19        | PHD finger protein 19                                                                             |
| Hs.460179.1.27 | chr16:18760387:18758770   | 18760364  | c | NM_015092    | 41 | CDS  | 23049  | SMG1         | PI-3-kinase-related kinase SMG-1                                                                  |
| Hs.460468.1.2  | chr16:28036139:28031873   | 28035873  | c | NM_015171    | 15 | CDS  | 23214  | XPO6         | exportin 6                                                                                        |
| Hs.460574.1.6  | chr16:29887077:29890229   | 29887416  | c | NM_194280    | 4  | CDS  | 124446 | LOC124446    | hypothetical protein BC017488                                                                     |
| Hs.460857.1.14 | chr16:54142516:54166043   | 54142746  | c | NM_017839    | 11 | CDS  | 54947  | FLJ20481     | hypothetical protein FLJ20481                                                                     |
| Hs.460885.1.8  | chr16:55796422:55799470   | 55796681  | c | NM_133368    | 2  | CDS  | 89970  | KIAA1972     | KIAA1972 protein                                                                                  |
| Hs.460923.1.14 | chr16:57114774:57112723   | 57114681  | c | NM_016284    | 47 | CDS  | 23019  | CNOT1        | CCR4-NOT transcription complex, subunit 1                                                         |
| Hs.460923.1.43 | chr16:57135011:57133974   | 57134737  | c | NM_016284    | 31 | CDS  | 23019  | CNOT1        | CCR4-NOT transcription complex, subunit 1                                                         |
| Hs.461247.1.3  | chr10:17922812:17927294   | 17923065  | c | NM_001009567 | 5  | CDS  | 414308 | MRC1L1       | mannose receptor, C type 1-like 1                                                                 |
| Hs.461510.1.6  | chr16:80255456:80261247   | 80255734  | c | NM_030629    | 7  | CDS  | 80790  | CMIP         | c-Maf-inducing protein                                                                            |
| Hs.461775.1.1  | chr16:88171631:88177605   | 88171811  | c | NM_153636    | 2  | CDS  | 27132  | CPNE7        | copine VII                                                                                        |
| Hs.461988.1.5  | chr10:86123552:86167506   | 86123741  | c | NM_018999    | 2  | CDS  | 54462  | KIAA1128     | KIAA1128                                                                                          |
| Hs.462278.1.7  | chr17:13921099:13946159   | 13921360  | c | NM_001303    | 3  | CDS  | 1352   | COX10        | COX10 homolog, cytochrome c oxidase assembly protein, heme A: farnesyltransferase (yeast)         |
| Hs.462323.1.12 | chr17:15883471:15878984   | 15883259  | c | NM_006311    | 44 | CDS  | 9611   | NCOR1        | nuclear receptor co-repressor 1                                                                   |
| Hs.462323.1.17 | chr17:15890989:15884534   | 15890931  | c | NM_006311    | 42 | CDS  | 9611   | NCOR1        | nuclear receptor co-repressor 1                                                                   |
| Hs.462323.1.39 | chr17:15906143:15905934   | 15906048  | c | NM_006311    | 36 | CDS  | 9611   | NCOR1        | nuclear receptor co-repressor 1                                                                   |
| Hs.462390.1.4  | chr17:18016456:18017819   | 18016630  | c | AL713794     | 10 | CDS  | 51168  | MYO15A       | myosin XVA                                                                                        |
| Hs.462606.1.15 | chr17:24881764:24885261   | 24881882  | c | NM_020791    | 18 | CDS  | 57551  | TAOK1        | TAO kinase 1                                                                                      |
| Hs.462680.1.1  | chr17:25832408:25835357   | 25832488  | c | NM_004871    | 2  | CDS  | 9527   | GOSR1        | golgi SNAP receptor complex member 1                                                              |
| Hs.462732.1.13 | chr17:27339630:27344373   | 27339674  | c | NM_015355    | 10 | CDS  | 23512  | SUZ12        | suppressor of zeste 12 homolog (Drosophila)                                                       |
| Hs.462742.1.31 | chr17:27559442:27560481   | 27559631  | c | AY094972     | 18 | CDS  | 55288  | RHOT1        | ras homolog gene family, member T1                                                                |
| Hs.462742.1.32 | chr17:27560578:27562247   | 27560870  | c | AY094972     | 19 | CDS  | 55288  | RHOT1        | ras homolog gene family, member T1                                                                |
| Hs.462777.1.24 | chr17:28010245:28005753   | 28009653  | c | NM_015194    | 17 | CDS  | 4642   | MYO1D        | myosin ID                                                                                         |
| Hs.462915.1.6  | chr17:33746386:33745554   | 33746159  | c | NM_001004334 | 4  | CDS  | 440435 | GPR158L1     | GPR158-like 1                                                                                     |
| Hs.462956.1.7  | chr17:34820359:34815088   | 34819722  | c | BC060758     | 17 | CDS  | 5469   | PPARBP       | PPAR binding protein                                                                              |
| Hs.462956.1.8  | chr17:34820359:34815088   | 34819931  | c | BC060758     | 17 | CDS  | 5469   | PPARBP       | PPAR binding protein                                                                              |
| Hs.463010.1.31 | chr17:36052232:36047351   | 36050352  | c | NM_003079    | 4  | CDS  | 6605   | SMARCE1      | SWI/SNF related, matrix associated, actin dependent regulator of chromatin, subfamily e, member 1 |
| Hs.463041.1.34 | chr1:8358381:8357171      | 8358036   | c | BC062342     | 15 | CDS  | 473    | RERE         | arginine-glutamic acid dipeptide (RE) repeats                                                     |

|                |                         |          |   |              |    |      |        |           |                                                                                               |
|----------------|-------------------------|----------|---|--------------|----|------|--------|-----------|-----------------------------------------------------------------------------------------------|
| Hs.463059.1.53 | chr17:37793822:37754084 | 37792483 | c | NM_139276    | 1  | 5UTR | 6774   | STAT3     | signal transducer and activator of transcription 3 (acute-phase response factor)              |
| Hs.463264.1.2  | chr17:41983202:41986081 | 41983237 | c | NM_001006607 | 10 | CDS  | 474170 | LOC474170 | c114 SLIT-like testicular protein                                                             |
| Hs.463278.1.21 | chr17:42367535:42370963 | 42369187 | c | NM_004287    | 5  | CDS  | 9570   | GOSR2     | golgi SNAP receptor complex member 2                                                          |
| Hs.463278.1.23 | chr17:42371070:42372919 | 42371153 | c | NM_054022    | 6  | CDS  | 9570   | GOSR2     | golgi SNAP receptor complex member 2                                                          |
| Hs.463278.1.24 | chr17:42371070:42372919 | 42371362 | c | NM_054022    | 6  | CDS  | 9570   | GOSR2     | golgi SNAP receptor complex member 2                                                          |
| Hs.463278.1.29 | chr17:42371070:42372919 | 42371752 | c | NM_054022    | 6  | CDS  | 9570   | GOSR2     | golgi SNAP receptor complex member 2                                                          |
| Hs.463295.1.18 | chr17:42561757:42556326 | 42561667 | c | NM_001256    | 16 | CDS  | 996    | CDC27     | cell division cycle 27                                                                        |
| Hs.463303.1.13 | chr17:42847285:42862182 | 42847340 | c | NM_152347    | 23 | CDS  | 124989 | FLJ40342  | hypothetical protein FLJ40342                                                                 |
| Hs.463303.1.8  | chr17:42780317:42793742 | 42781635 | c | NM_152347    | 9  | CDS  | 124989 | FLJ40342  | hypothetical protein FLJ40342                                                                 |
| Hs.463416.1.18 | chr17:45789613:45790566 | 45790426 | c | NM_022167    | 9  | CDS  | 64132  | XYLT2     | xylosyltransferase II                                                                         |
| Hs.463439.1.22 | chr17:46409467:46408262 | 46408962 | c | AY236487     | 13 | CDS  | 9043   | SPAG9     | sperm associated antigen 9                                                                    |
| Hs.463964.1.12 | chr17:63933810:63929557 | 63933666 | c | NM_017983    | 13 | CDS  | 55062  | WIPI49    | WD40 repeat protein Interacting with phospholositides of 49kDa                                |
| Hs.464137.1.38 | chr17:71481300:71465243 | 71480985 | c | NM_007292    | 3  | CDS  | 51     | ACOX1     | acyl-Coenzyme A oxidase 1, palmitoyl                                                          |
| Hs.464184.1.19 | chr17:72702589:72703878 | 72702708 | c | NM_003003    | 7  | CDS  | 6397   | SEC14L1   | SEC14-like 1 (S. cerevisiae)                                                                  |
| Hs.464333.1.47 | chr17:77190789:77187727 | 77190715 | c | NM_017921    | 4  | CDS  | 55666  | NPL4      | nuclear protein localization 4                                                                |
| Hs.46440.1.4   | chr12:21318669:21313969 | 21318143 | c | NM_021094    | 13 | CDS  | 6579   | SLCO1A2   | solute carrier organic anion transporter family, member 1A2                                   |
| Hs.46440.1.7   | chr12:21339797:21338312 | 21339795 | c | NM_021094    | 9  | CDS  | 6579   | SLCO1A2   | solute carrier organic anion transporter family, member 1A2                                   |
| Hs.464442.1.5  | chr18:1259687:1245216   | 1259161  | c | NM_031416    | 6  | 3UTR | 56651  | C18orf2   | chromosome 18 open reading frame 2                                                            |
| Hs.464442.1.6  | chr18:1259687:1245216   | 1259527  | c | NM_031416    | 6  | 3UTR | 56651  | C18orf2   | chromosome 18 open reading frame 2                                                            |
| Hs.464896.1.11 | chr18:31077256:31088193 | 31077342 | c | AK027384     | 3  | CDS  | 84307  | ZNF397    | zinc finger protein 397                                                                       |
| Hs.464896.1.15 | chr18:31077256:31088193 | 31078062 | c | AK027384     | 3  | CDS  | 84307  | ZNF397    | zinc finger protein 397                                                                       |
| Hs.464912.1.8  | chr18:31827062:31824557 | 31825817 | c | BC000225     | 8  | 3UTR | 55197  | P15RS     | hypothetical protein FLJ10656                                                                 |
| Hs.465102.1.12 | chr18:45362026:45362729 | 45362217 | c | NM_006033    | 6  | CDS  | 9388   | LIPG      | lipase, endothelial                                                                           |
| Hs.465102.1.6  | chr18:45347990:45349804 | 45348131 | c | NM_006033    | 3  | CDS  | 9388   | LIPG      | lipase, endothelial                                                                           |
| Hs.465323.1.21 | chr18:58093687:58098572 | 58093785 | c | NM_020854    | 19 | CDS  | 57614  | KIAA1468  | KIAA1468                                                                                      |
| Hs.465818.1.22 | chr19:8566645:8563755   | 8566636  | c | NM_030957    | 12 | CDS  | 81794  | ADAMTS10  | a disintegrin-like and metalloprotease (reprolysin type) with thrombospondin type 1 motif, 10 |
| Hs.466391.1.19 | chr19:35195279:35197633 | 35195423 | c | NM_003796    | 10 | CDS  | 8725   | C19orf2   | chromosome 19 open reading frame 2                                                            |
| Hs.466435.1.26 | chr19:38190759:38185747 | 38190512 | c | NM_033103    | 7  | CDS  | 85415  | RHPN2     | rhophilin, Rho GTPase binding protein 2                                                       |
| Hs.466848.1.63 | chr19:48064092:48063143 | 48063198 | c | BC058285     | 6  | CDS  | 5669   | PSG1      | pregnancy specific beta-1-glycoprotein 1                                                      |
| Hs.466848.1.65 | chr19:48064092:48063143 | 48063702 | c | BC058285     | 6  | CDS  | 5669   | PSG1      | pregnancy specific beta-1-glycoprotein 1                                                      |
| Hs.466929.1.9  | chr19:50373190:50360293 | 50372855 | c | NM_024108    | 1  | CDS  | 79090  | MGC2650   | hypothetical protein MGC2650                                                                  |
| Hs.466937.1.21 | chr19:50586977:50581279 | 50586886 | c | NM_006663    | 8  | CDS  | 10848  | PPP1R13L  | protein phosphatase 1, regulatory (inhibitor) subunit 13 like                                 |
| Hs.467288.1.23 | chr19:59560348:59560041 | 59560062 | c | NM_002287    | 5  | CDS  | 3903   | LAIR1     | leukocyte-associated Ig-like receptor 1                                                       |
| Hs.467524.1.32 | chr1:21800368:21795895  | 21799650 | c | NM_032236    | 11 | CDS  | 84196  | USP48     | ubiquitin specific protease 48                                                                |
| Hs.467733.1.9  | chr2:11671557:11675884  | 11671989 | c | NM_014668    | 7  | CDS  | 9687   | GREB1     | GREB1 protein                                                                                 |
| Hs.467793.1.1  | chr2:17856863:17862823  | 17856853 | c | NM_182625    | 1  | 5UTR | 348654 | FLJ40869  | hypothetical protein FLJ40869                                                                 |
| Hs.467868.1.21 | chr2:24318166:24324931  | 24318343 | c | BC050462     | 5  | CDS  | 375190 | FLJ30851  | FLJ30851 protein                                                                              |
| Hs.468099.1.8  | chr2:32429069:32434953  | 32429142 | c | NM_032312    | 3  | CDS  | 84272  | YIPF4     | Yip1 domain family, member 4                                                                  |
| Hs.468186.1.31 | chr2:37147404:37146099  | 37146132 | c | NM_019024    | 28 | CDS  | 54497  | KIAA1414  | KIAA1414 protein                                                                              |
| Hs.468226.1.15 | chr2:38945351:38941709  | 38945198 | c | NM_145646    | 21 | 3UTR | 90957  | DHX57     | DEAH (Asp-Glu-Ala-Asp/His) box polypeptide 57                                                 |
| Hs.468226.1.38 | chr2:38992846:38987196  | 38991838 | c | NM_145646    | 8  | 3UTR | 90957  | DHX57     | DEAH (Asp-Glu-Ala-Asp/His) box polypeptide 57                                                 |
| Hs.468239.1.40 | chr2:39495040:39482245  | 39494957 | c | NM_003618    | 3  | CDS  | 8491   | MAP4K3    | mitogen-activated protein kinase kinase kinase kinase 3                                       |
| Hs.468490.1.5  | chr2:48847737:48837591  | 48847560 | c | NM_000233    | 9  | CDS  | 3973   | LHCGR     | luteinizing hormone/choriogonadotropin receptor                                               |

|                |                           |           |   |           |    |      |        |            |                                                                                                                                     |
|----------------|---------------------------|-----------|---|-----------|----|------|--------|------------|-------------------------------------------------------------------------------------------------------------------------------------|
| Hs.46850.1.26  | chr12:100664282:100662541 | 100664156 | c | NM_024312 | 11 | CDS  | 79158  | MGC4170    | MGC4170 protein                                                                                                                     |
| Hs.46850.1.30  | chr12:100676397:100667404 | 100674539 | c | NM_024312 | 7  | CDS  | 79158  | MGC4170    | MGC4170 protein                                                                                                                     |
| Hs.468623.1.14 | chr2:58270715:58273926    | 58270953  | c | NM_006296 | 9  | CDS  | 7444   | VRK2       | vaccinia related kinase 2                                                                                                           |
| Hs.468663.1.53 | chr2:61365852:61362083    | 61365574  | c | NM_014709 | 60 | CDS  | 9736   | USP34      | ubiquitin specific protease 34                                                                                                      |
| Hs.468663.1.70 | chr2:61404182:61398563    | 61404056  | c | NM_014709 | 41 | CDS  | 9736   | USP34      | ubiquitin specific protease 34                                                                                                      |
| Hs.468688.1.21 | chr10:127419761:127421616 | 127420224 | c | NM_015608 | 16 | CDS  | 26098  | C10orf137  | chromosome 10 open reading frame 137                                                                                                |
| Hs.468840.1.1  | chr2:68504177:68519110    | 68504188  | c | NM_002664 | 1  | CDS  | 5341   | PLEK       | pleckstrin                                                                                                                          |
| Hs.469116.1.17 | chr1:27116517:27113946    | 27116084  | c | NM_003047 | 5  | CDS  | 6548   | SLC9A1     | solute carrier family 9 (sodium/hydrogen exchanger), isoform 1 (antiporter, Na+/H+, amiloride sensitive)                            |
| Hs.469331.1.31 | chr2:96295756:96283162    | 96295626  | c | NM_020151 | 1  | CDS  | 56910  | STARD7     | START domain containing 7                                                                                                           |
| Hs.469386.1.18 | chr2:98652125:98662456    | 98652956  | c | NM_004027 | 24 | CDS  | 3631   | INPP4A     | inositol polyphosphate-4-phosphatase, type 1, 107kDa                                                                                |
| Hs.469473.1.5  | chr2:101081052:101081329  | 101081095 | c | NM_000993 | 4  | CDS  | 6160   | RPL31      | ribosomal protein L31                                                                                                               |
| Hs.469521.1.1  | chr2:102437697:102442802  | 102437894 | c | NM_003855 | 1  | CDS  | 8809   | IL18R1     | interleukin 18 receptor 1                                                                                                           |
| Hs.469615.1.10 | chr2:109661001:109659277  | 109660733 | c | NM_144710 | 10 | CDS  | 151011 | SEPT10     | septin 10                                                                                                                           |
| Hs.469630.1.6  | chr2:109919084:109923125  | 109919097 | c | NM_005054 | 4  | CDS  | 84220  | RANBP2L1   | RAN binding protein 2-like 1                                                                                                        |
| Hs.469723.1.13 | chr1:28656030:28663852    | 28656761  | c | NM_001269 | 3  | 5UTR | 1104   | RCC1       | regulator of chromosome condensation 1                                                                                              |
| Hs.469723.1.15 | chr1:28656030:28663852    | 28658020  | c | NM_001269 | 3  | 5UTR | 1104   | RCC1       | regulator of chromosome condensation 1                                                                                              |
| Hs.469809.1.16 | chr2:120420381:120425778  | 120420476 | c | NM_002830 | 18 | CDS  | 5775   | PTPN4      | protein tyrosine phosphatase, non-receptor type 4 (megakaryocyte)                                                                   |
| Hs.469840.1.23 | chr2:121875314:121872207  | 121875059 | c | NM_015282 | 28 | CDS  | 23332  | CLASP1     | cytoplasmic linker associated protein 1                                                                                             |
| Hs.469872.1.42 | chr2:127767318:127766653  | 127767020 | c | NM_000122 | 2  | CDS  | 2071   | ERCC3      | excision repair cross-complementing rodent repair deficiency, complementation group 3 (xeroderma pigmentosum group B complementing) |
| Hs.469879.1.10 | chr2:127962984:127960471  | 127962337 | c | NM_017969 | 12 | CDS  | 55677  | FLJ10006   | hypothetical protein FLJ10006                                                                                                       |
| Hs.469971.1.2  | chr2:132313954:132341937  | 132314084 | c | NM_013310 | 1  | 5UTR | 29798  | C2orf27    | chromosome 2 open reading frame 27                                                                                                  |
| Hs.469971.1.3  | chr2:132313954:132341937  | 132314250 | c | NM_013310 | 1  | 5UTR | 29798  | C2orf27    | chromosome 2 open reading frame 27                                                                                                  |
| Hs.470126.1.14 | chr2:143549017:143551924  | 143549373 | c | NM_003937 | 7  | CDS  | 8942   | KYNU       | kynureninase (L-kynurenine hydrolase)                                                                                               |
| Hs.470174.1.17 | chr2:148539351:148534824  | 148538976 | c | NM_002552 | 9  | CDS  | 5000   | ORC4L      | origin recognition complex, subunit 4-like (yeast)                                                                                  |
| Hs.470445.1.3  | chr2:163105352:163082459  | 163105264 | c | NM_033272 | 9  | CDS  | 90134  | KCNH7      | potassium voltage-gated channel, subfamily H (eag-related), member 7                                                                |
| Hs.470457.1.41 | chr2:165425703:165412133  | 165425471 | c | NM_014900 | 2  | CDS  | 22837  | COBL1      | COBL-like 1                                                                                                                         |
| Hs.470538.1.28 | chr2:169913730:169908606  | 169913396 | c | NM_004525 | 31 | CDS  | 4036   | LRP2       | low density lipoprotein-related protein 2                                                                                           |
| Hs.470538.1.30 | chr2:169923004:169921793  | 169922801 | c | NM_004525 | 25 | CDS  | 4036   | LRP2       | low density lipoprotein-related protein 2                                                                                           |
| Hs.470544.1.19 | chr2:170315265:170318108  | 170315575 | c | NM_004792 | 12 | CDS  | 9360   | PPIG       | peptidyl-prolyl isomerase G (cyclophilin G)                                                                                         |
| Hs.470646.1.17 | chr2:173726928:173738834  | 173727030 | c | NM_007023 | 29 | CDS  | 11069  | RAPGEF4    | Rap guanine nucleotide exchange factor (GEF) 4                                                                                      |
| Hs.470996.1.21 | chr2:197465345:197463384  | 197465219 | c | NM_012086 | 13 | CDS  | 9330   | GTF3C3     | general transcription factor IIIC, polypeptide 3, 102kDa                                                                            |
| Hs.470996.1.32 | chr2:197470788:197469298  | 197470319 | c | NM_012086 | 9  | CDS  | 9330   | GTF3C3     | general transcription factor IIIC, polypeptide 3, 102kDa                                                                            |
| Hs.471096.1.14 | chr2:202413271:202408440  | 202412219 | c | NM_020919 | 23 | CDS  | 57679  | ALS2       | amyotrophic lateral sclerosis 2 (juvenile)                                                                                          |
| Hs.471096.1.21 | chr2:202431902:202428965  | 202431413 | c | NM_020919 | 11 | CDS  | 57679  | ALS2       | amyotrophic lateral sclerosis 2 (juvenile)                                                                                          |
| Hs.471096.1.27 | chr2:202451109:202447989  | 202449686 | c | NM_020919 | 4  | CDS  | 57679  | ALS2       | amyotrophic lateral sclerosis 2 (juvenile)                                                                                          |
| Hs.471104.1.11 | chr2:202974711:202977888  | 202974752 | c | NM_015934 | 5  | CDS  | 51602  | NOP5/NOP58 | nucleolar protein NOP5/NOP58                                                                                                        |
| Hs.471145.1.5  | chr2:203903883:203907481  | 203904042 | c | NM_198945 | 27 | CDS  | 65065  | NBEAL1     | neurobeachin-like 1                                                                                                                 |
| Hs.471162.1.16 | chr2:204179812:204167386  | 204179727 | c | NM_025252 | 4  | CDS  | 65059  | RAPH1      | Ras association (RalGDS/AF-6) and pleckstrin homology domains 1                                                                     |
| Hs.471200.1.24 | chr2:206433783:206435975  | 206433921 | c | NM_003872 | 9  | CDS  | 8828   | NRP2       | neuropilin 2                                                                                                                        |
| Hs.471200.1.5  | chr2:206387952:206406422  | 206388140 | c | NM_003872 | 2  | CDS  | 8828   | NRP2       | neuropilin 2                                                                                                                        |
| Hs.471316.1.13 | chr2:214007587:214030392  | 214008208 | c | NM_024532 | 5  | CDS  | 79582  | SPAG16     | sperm associated antigen 16                                                                                                         |

|                |                          |           |   |              |    |      |        |          |                                                                       |
|----------------|--------------------------|-----------|---|--------------|----|------|--------|----------|-----------------------------------------------------------------------|
| Hs.471316.1.20 | chr2:214054376:214065239 | 214054519 | c | NM_024532    | 8  | CDS  | 79582  | SPAG16   | sperm associated antigen 16                                           |
| Hs.471316.1.8  | chr2:214007587:214030392 | 214007656 | c | NM_024532    | 5  | CDS  | 79582  | SPAG16   | sperm associated antigen 16                                           |
| Hs.471461.1.43 | chr2:223624911:223631719 | 223625448 | c | NM_004457    | 16 | CDS  | 2181   | ACSL3    | acyl-CoA synthetase long-chain family member 3                        |
| Hs.471582.1.8  | chr2:231078854:231080138 | 231079006 | c | NM_138402    | 9  | CDS  | 93349  | LOC93349 | hypothetical protein BC004921                                         |
| Hs.471610.1.16 | chr2:231930260:231946803 | 231930375 | c | NM_025139    | 9  | CDS  | 80210  | FLJ12584 | melanoma/melanocyte specific protein KU-MEL-1                         |
| Hs.471610.1.6  | chr2:231905220:231906855 | 231905498 | c | NM_025139    | 4  | CDS  | 80210  | FLJ12584 | melanoma/melanocyte specific protein KU-MEL-1                         |
| Hs.471637.1.12 | chr2:232820935:232826686 | 232821097 | c | NM_152383    | 7  | CDS  | 129563 | MGC42174 | hypothetical protein MGC42174                                         |
| Hs.471818.1.35 | chr11:34075885:34077425  | 34076030  | c | NM_005898    | 18 | CDS  | 4076   | M11S1    | membrane component, chromosome 11, surface marker 1                   |
| Hs.471834.1.2  | chr2:241699821:241707721 | 241700340 | c | AK074062     | 7  | CDS  | 25992  | SNED1    | sushi, nidogen and EGF-like domains 1                                 |
| Hs.471933.1.8  | chr20:1300719:1298717    | 1300379   | c | NM_000801    | 4  | 3UTR | 2280   | FKBP1A   | FK506 binding protein 1A, 12kDa                                       |
| Hs.471933.1.9  | chr20:1300719:1298717    | 1300426   | c | NM_000801    | 4  | 3UTR | 2280   | FKBP1A   | FK506 binding protein 1A, 12kDa                                       |
| Hs.472038.1.13 | chr1:38157575:38158309   | 38157575  | c | NM_016037    | 7  | CDS  | 51118  | UTP11L   | UTP11-like, U3 small nucleolar ribonucleoprotein, (yeast)             |
| Hs.472040.1.17 | chr20:5486590:5476497    | 5486497   | c | NM_019593    | 19 | CDS  | 56261  | KIAA1434 | hypothetical protein KIAA1434                                         |
| Hs.472054.1.20 | chr20:6036178:6026279    | 6036097   | c | NM_017671    | 6  | CDS  | 55612  | C20orf42 | chromosome 20 open reading frame 42                                   |
| Hs.472101.1.19 | chr20:9330238:9336563    | 9330349   | c | NM_000933    | 19 | CDS  | 5332   | PLCB4    | phospholipase C, beta 4                                               |
| Hs.472213.1.60 | chr20:17588624:17587335  | 17588521  | c | NM_004587    | 2  | CDS  | 6238   | RRBP1    | ribosome binding protein 1 homolog 180kDa (dog)                       |
| Hs.472225.1.8  | chr20:18327166:18325191  | 18326988  | c | NM_018152    | 13 | CDS  | 55184  | C20orf12 | chromosome 20 open reading frame 12                                   |
| Hs.472630.1.14 | chr20:34959638:34954884  | 34959388  | c | NM_015474    | 15 | CDS  | 25939  | SAMHD1   | SAM domain and HD domain 1                                            |
| Hs.472630.1.32 | chr20:34988998:34981337  | 34988771  | c | NM_015474    | 6  | CDS  | 25939  | SAMHD1   | SAM domain and HD domain 1                                            |
| Hs.472737.1.12 | chr20:39159396:39160268  | 39159476  | c | NM_003286    | 10 | CDS  | 7150   | TOP1     | topoisomerase (DNA) I                                                 |
| Hs.472856.1.4  | chr20:43999632:44001026  | 43999944  | c | NM_022104    | 2  | 5UTR | 63935  | C20orf67 | chromosome 20 open reading frame 67                                   |
| Hs.472860.1.9  | chr20:44188748:44190183  | 44189207  | c | NM_001250    | 6  | CDS  | 958    | CD40     | CD40 antigen (TNF receptor superfamily member 5)                      |
| Hs.47288.1.11  | chr9:70628574:70606195   | 70628334  | c | NM_001007471 | 7  | CDS  | 80036  | TRPM3    | transient receptor potential cation channel, subfamily M, member 3    |
| Hs.47288.1.20  | chr9:70687472:70672489   | 70687393  | c | NM_001007470 | 5  | CDS  | 80036  | TRPM3    | transient receptor potential cation channel, subfamily M, member 3    |
| Hs.473087.1.35 | chr1:41145020:41146422   | 41145023  | c | NM_001905    | 18 | 3UTR | 1503   | CTPS     | CTP synthase                                                          |
| Hs.473163.1.12 | chr20:55181662:55179572  | 55181459  | c | NM_001719    | 6  | CDS  | 655    | BMP7     | bone morphogenetic protein 7 (osteogenic protein 1)                   |
| Hs.473163.1.17 | chr20:55192184:55183471  | 55191987  | c | NM_001719    | 4  | CDS  | 655    | BMP7     | bone morphogenetic protein 7 (osteogenic protein 1)                   |
| Hs.473254.1.18 | chr20:60290331:60292496  | 60290544  | c | NM_014835    | 9  | CDS  | 9885   | OSBPL2   | oxysterol binding protein-like 2                                      |
| Hs.473450.1.13 | chr21:21726473:21760797  | 21726596  | c | NM_004540    | 12 | CDS  | 4685   | NCAM2    | neural cell adhesion molecule 2                                       |
| Hs.473554.1.11 | chr21:29893020:29890762  | 29892985  | c | NM_000830    | 8  | CDS  | 2897   | GRIK1    | glutamate receptor, ionotropic, kainate 1                             |
| Hs.473727.1.10 | chr21:36337949:36336057  | 36337852  | c | NM_001007258 | 10 | CDS  | 54093  | C21orf18 | chromosome 21 open reading frame 18                                   |
| Hs.473727.1.23 | chr21:36347750:36342565  | 36347658  | c | NM_001007258 | 7  | CDS  | 54093  | C21orf18 | chromosome 21 open reading frame 18                                   |
| Hs.473894.1.7  | chr21:42194799:42192541  | 42194702  | c | NM_199050    | 11 | CDS  | 25966  | C21orf25 | chromosome 21 open reading frame 25                                   |
| Hs.473918.1.15 | chr21:42855348:42856993  | 42855388  | c | NM_018964    | 13 | CDS  | 54020  | SLC37A1  | solute carrier family 37 (glycerol-3-phosphate transporter), member 1 |
| Hs.473918.1.7  | chr21:42819037:42827876  | 42819217  | c | NM_018964    | 4  | CDS  | 54020  | SLC37A1  | solute carrier family 37 (glycerol-3-phosphate transporter), member 1 |
| Hs.474185.1.3  | chr22:17268793:17272238  | 17268956  | c | NM_005675    | 2  | CDS  | 8214   | DGCR6    | DiGeorge syndrome critical region gene 6                              |
| Hs.474441.1.11 | chr22:25256807:25253266  | 25256442  | c | NM_001008566 | 4  | CDS  | 8459   | TPST2    | tyrosylprotein sulfotransferase 2                                     |
| Hs.474536.1.11 | chr22:28719401:28723422  | 28719533  | c | NM_021090    | 8  | CDS  | 8897   | MTMR3    | myotubularin related protein 3                                        |
| Hs.474751.1.64 | chr22:35032593:35029942  | 35032133  | c | NM_002473    | 14 | CDS  | 4627   | MYH9     | myosin, heavy polypeptide 9, non-muscle                               |
| Hs.474853.1.5  | chr22:37799591:37801437  | 37800205  | c | NM_021822    | 2  | CDS  | 60489  | APOBEC3G | apolipoprotein B mRNA editing enzyme, catalytic polypeptide-like 3G   |

|                |                          |           |   |              |    |      |        |          |                                                                             |
|----------------|--------------------------|-----------|---|--------------|----|------|--------|----------|-----------------------------------------------------------------------------|
| Hs.474905.1.26 | chr22:39150109:39144886  | 39149855  | c | NM_020831    | 7  | CDS  | 57591  | MKL1     | megakaryoblastic leukemia (translocation) 1                                 |
| Hs.474982.2.12 | chr22:40236422:40238030  | 40236627  | c | NM_001098    | 6  | CDS  | 50     | ACO2     | aconitase 2, mitochondrial                                                  |
| Hs.474982.2.7  | chr22:40232473:40235880  | 40232791  | c | NM_001098    | 4  | CDS  | 50     | ACO2     | aconitase 2, mitochondrial                                                  |
| Hs.475110.1.7  | chr22:44138826:44142364  | 44139370  | c | NM_015653    | 4  | CDS  | 26150  | RIBC2    | RIB43A domain with coiled-coils 2                                           |
| Hs.475392.1.10 | chr3:9986402:9980882     | 9986262   | c | NM_018447    | 7  | CDS  | 55831  | LOC55831 | 30 kDa protein                                                              |
| Hs.475392.1.8  | chr3:9986402:9980882     | 9985336   | c | NM_018447    | 7  | CDS  | 55831  | LOC55831 | 30 kDa protein                                                              |
| Hs.475392.1.9  | chr3:9986402:9980882     | 9986211   | c | NM_018447    | 7  | CDS  | 55831  | LOC55831 | 30 kDa protein                                                              |
| Hs.475401.1.17 | chr3:10295748:10295904   | 10295849  | c | NM_014760    | 7  | 3UTR | 9797   | TATDN2   | TatD DNase domain containing 2                                              |
| Hs.475629.1.36 | chr3:17640344:17525102   | 17640211  | c | NM_014744    | 2  | 5UTR | 9779   | TBC1D5   | TBC1 domain family, member 5                                                |
| Hs.475663.1.12 | chr3:19994900:20000203   | 19994956  | c | NM_004162    | 5  | CDS  | 5868   | RAB5A    | RAB5A, member RAS oncogene family                                           |
| Hs.475848.1.11 | chr18:664160:663077      | 663914    | c | X67098       | 14 | 3UTR | 55556  | ENOSF1   | enolase superfamily member 1                                                |
| Hs.475848.1.13 | chr18:664160:663077      | 664001    | c | X67098       | 14 | 3UTR | 55556  | ENOSF1   | enolase superfamily member 1                                                |
| Hs.475945.1.1  | chr3:37433220:37451435   | 37433278  | c | NM_178340    | 3  | CDS  | 339883 | APRG1    | AP20 region protein                                                         |
| Hs.475945.1.3  | chr3:37434245:37451435   | 37434869  | c | NM_178338    | 6  | 3UTR | 339883 | APRG1    | AP20 region protein                                                         |
| Hs.476093.1.23 | chr3:45126968:45112065   | 45126740  | c | NM_022842    | 4  | CDS  | 64866  | CDCP1    | CUB domain containing protein 1                                             |
| Hs.476164.1.40 | chr1:52652524:52649796   | 52652406  | c | NM_001009881 | 13 | CDS  | 23318  | ZCCHC11  | zinc finger, CCHC domain containing 11                                      |
| Hs.476280.1.2  | chr1:52949468:52957545   | 52949638  | c | NM_024646    | 3  | CDS  | 79699  | ZYG11B   | zyg-11 homolog B (C. elegans)                                               |
| Hs.476308.1.5  | chr3:52208497:52211562   | 52208853  | c | NM_000688    | 3  | CDS  | 211    | ALAS1    | aminolevulinatase, delta-, synthase 1                                       |
| Hs.476415.1.26 | chr3:57269222:57269695   | 57269504  | c | NM_012096    | 18 | CDS  | 26060  | APPL     | adaptor protein containing pH domain, PTB domain and leucine zipper motif 1 |
| Hs.476517.1.11 | chr4:38739261:38746956   | 38739360  | c | NM_138389    | 7  | CDS  | 92689  | LOC92689 | hypothetical protein BC001096                                               |
| Hs.476972.1.21 | chr3:99155925:99153895   | 99155541  | c | AY456380     | 4  | 5UTR | 84864  | MINA     | MYC induced nuclear antigen                                                 |
| Hs.477114.1.15 | chr3:113141168:113142071 | 113141168 | c | NM_145753    | 5  | CDS  | 90102  | PHLDB2   | pleckstrin homology-like domain, family B, member 2                         |
| Hs.477114.1.6  | chr3:113086950:113114855 | 113087332 | c | NM_145753    | 1  | CDS  | 90102  | PHLDB2   | pleckstrin homology-like domain, family B, member 2                         |
| Hs.477162.1.14 | chr3:115278480:115281442 | 115278567 | c | NM_024638    | 7  | CDS  | 79691  | QTRTD1   | queuine tRNA-ribosyltransferase domain containing 1                         |
| Hs.477375.1.9  | chr3:124820175:124815887 | 124817889 | c | NM_005965    | 17 | CDS  | 4638   | MYLK     | myosin, light polypeptide kinase                                            |
| Hs.477440.1.19 | chr3:126753714:126749127 | 126753599 | c | NM_022776    | 9  | CDS  | 114885 | OSBPL11  | oxysterol binding protein-like 11                                           |
| Hs.477440.1.31 | chr3:126777722:126769130 | 126777686 | c | NM_022776    | 5  | CDS  | 114885 | OSBPL11  | oxysterol binding protein-like 11                                           |
| Hs.477475.1.3  | chr3:127809191:127774184 | 127809037 | c | AB113648     | 2  | 5UTR | 114112 | TXNRD3   | thioredoxin reductase 3                                                     |
| Hs.477495.1.4  | chr1:58854618:58853274   | 58854465  | c | AB067502     | 5  | CDS  | 114803 | MYSM1    | myb-like, SWIRM and MPN domains 1                                           |
| Hs.477898.1.14 | chr3:150354134:150355591 | 150354619 | c | NM_032383    | 7  | CDS  | 84343  | HPS3     | Hermansky-Pudlak syndrome 3                                                 |
| Hs.478125.1.36 | chr1:62291940:62294224   | 62292071  | c | NM_170605    | 35 | CDS  | 10207  | INADL    | InaD-like (Drosophila)                                                      |
| Hs.478125.1.40 | chr1:62294912:62298873   | 62295086  | c | NM_170605    | 37 | CDS  | 10207  | INADL    | InaD-like (Drosophila)                                                      |
| Hs.478199.1.11 | chr3:171475778:171480716 | 171476136 | c | NM_002740    | 8  | CDS  | 5584   | PRKCI    | protein kinase C, iota                                                      |
| Hs.478407.1.1  | chr3:182115486:182133823 | 182115617 | c | NM_001013439 | 2  | 5UTR | 8087   | FXR1     | fragile X mental retardation, autosomal homolog 1                           |
| Hs.478429.1.33 | chr3:184114485:184118512 | 184115095 | c | NM_014616    | 29 | CDS  | 23200  | ATP11B   | ATPase, Class VI, type 11B                                                  |
| Hs.478429.1.7  | chr3:184036961:184037560 | 184037114 | c | NM_014616    | 6  | CDS  | 23200  | ATP11B   | ATPase, Class VI, type 11B                                                  |
| Hs.478459.1.6  | chr3:184937320:184948161 | 184937451 | c | NM_018023    | 8  | CDS  | 55689  | YEATS2   | YEATS domain containing 2                                                   |
| Hs.478673.1.18 | chr3:191829990:191844738 | 191830280 | c | NM_002182    | 9  | CDS  | 3556   | IL1RAP   | interleukin 1 receptor accessory protein                                    |
| Hs.478673.1.21 | chr3:191829990:191844738 | 191830776 | c | NM_002182    | 9  | CDS  | 3556   | IL1RAP   | interleukin 1 receptor accessory protein                                    |
| Hs.478708.1.13 | chr3:194844597:194846043 | 194844642 | c | NM_015560    | 14 | CDS  | 4976   | OPA1     | optic atrophy 1 (autosomal dominant)                                        |
| Hs.479122.1.14 | chr4:8493358:8490793     | 8493505   | c | NM_003501    | 16 | CDS  | 8310   | ACOX3    | acyl-Coenzyme A oxidase 3, pristanoyl                                       |
| Hs.479264.1.7  | chr4:17260286:17261374   | 17260966  | c | NM_015907    | 4  | CDS  | 51056  | LAP3     | leucine aminopeptidase 3                                                    |
| Hs.479298.1.7  | chr4:20387666:20390679   | 20387728  | c | NM_145048    | 5  | CDS  | 133015 | MGC29898 | hypothetical protein MGC29898                                               |
| Hs.479384.1.35 | chr4:25456966:25454252   | 25456792  | c | NM_015187    | 16 | CDS  | 23231  | KIAA0746 | KIAA0746 protein                                                            |
| Hs.479396.1.20 | chr4:26107945:26108309   | 26108081  | c | NM_005349    | 10 | CDS  | 3516   | RBPSUH   | recombining binding protein suppressor of hairless (Drosophila)             |
| Hs.479403.1.1  | chr4:26292345:26298503   | 26292428  | c | NM_018317    | 3  | CDS  | 55296  | TBC1D19  | TBC1 domain family, member 19                                               |
| Hs.479491.1.34 | chr1:68371658:68336952   | 68371548  | c | NM_001002292 | 2  | CDS  | 79971  | C1orf139 | chromosome 1 open reading frame 139                                         |

|                |                          |           |   |              |    |      |        |              |                                                                                               |
|----------------|--------------------------|-----------|---|--------------|----|------|--------|--------------|-----------------------------------------------------------------------------------------------|
| Hs.479634.1.21 | chr4:41903192:41905930   | 41903471  | c | NM_006345    | 10 | CDS  | 10463  | SLC30A9      | solute carrier family 30 (zinc transporter), member 9                                         |
| Hs.479693.1.17 | chr1:70415257:70417142   | 70415258  | c | NM_004768    | 7  | CDS  | 9295   | SFRS11       | splicing factor, arginine/serine-rich 11                                                      |
| Hs.479808.1.8  | chr4:57739519:57738431   | 57739353  | c | NM_001553    | 4  | CDS  | 3490   | IGFBP7       | insulin-like growth factor binding protein 7                                                  |
| Hs.479954.1.7  | chr4:75390841:75405257   | 75391380  | c | BC037529     | 2  | 5UTR | 441024 | MTHFD2L      | methylenetetrahydrofolate dehydrogenase (NADP+ dependent) 2-like                              |
| Hs.480101.1.16 | chr4:84731562:84727294   | 84731484  | c | NM_133636    | 2  | CDS  | 113510 | HEL308       | DNA helicase HEL308                                                                           |
| Hs.480101.1.17 | chr4:84731562:84727294   | 84731522  | c | NM_133636    | 2  | CDS  | 113510 | HEL308       | DNA helicase HEL308                                                                           |
| Hs.480190.1.25 | chr4:88403475:88404429   | 88403605  | c | NM_005935    | 12 | CDS  | 4299   | AFF1         | AF4/FMR2 family, member 1                                                                     |
| Hs.480452.1.27 | chr4:106725143:106716798 | 106724963 | c | NM_176869    | 5  | CDS  | 27068  | PPA2         | inorganic pyrophosphatase 2                                                                   |
| Hs.480597.1.15 | chr1:77889452:77879178   | 77889358  | c | NM_015017    | 22 | CDS  | 23032  | USP33        | ubiquitin specific protease 33                                                                |
| Hs.480672.1.7  | chr4:124307156:124335146 | 124307256 | c | NM_145207    | 11 | CDS  | 166378 | SPATA5       | spermatogenesis associated 5                                                                  |
| Hs.480694.1.9  | chr4:125988759:125957666 | 125988696 | c | NM_020337    | 1  | CDS  | 57182  | KIAA1223     | KIAA1223 protein                                                                              |
| Hs.480701.1.9  | chr4:129200283:129199597 | 129200229 | c | NM_152778    | 12 | CDS  | 256471 | MGC33302     | hypothetical protein MGC33302                                                                 |
| Hs.480712.1.26 | chr4:129386074:129393329 | 129387660 | c | NM_018078    | 9  | CDS  | 55132  | LARP2        | La ribonucleoprotein domain family, member 2                                                  |
| Hs.480712.1.30 | chr4:129400949:129440953 | 129401113 | c | NM_018078    | 11 | CDS  | 55132  | LARP2        | La ribonucleoprotein domain family, member 2                                                  |
| Hs.480712.1.43 | chr4:129488754:129499114 | 129488828 | c | BC062606     | 6  | CDS  | 55132  | LARP2        | La ribonucleoprotein domain family, member 2                                                  |
| Hs.480712.1.49 | chr4:129488754:129499114 | 129489894 | c | BC062606     | 6  | CDS  | 55132  | LARP2        | La ribonucleoprotein domain family, member 2                                                  |
| Hs.480792.1.14 | chr4:140811923:140807980 | 140811341 | c | NM_030648    | 3  | CDS  | 80854  | SET7         | SET domain-containing protein 7                                                               |
| Hs.480848.1.17 | chr4:144493702:144499052 | 144494323 | c | NM_032557    | 9  | CDS  | 84640  | USP38        | ubiquitin specific protease 38                                                                |
| Hs.480938.1.67 | chr4:152293183:152207823 | 152291566 | c | NM_006726    | 2  | CDS  | 987    | LRBA         | LPS-responsive vesicle trafficking, beach and anchor containing                               |
| Hs.481133.1.13 | chr4:168050388:168037941 | 168049967 | c | NM_016950    | 8  | CDS  | 50859  | SPOCK3       | sparc/osteonectin, cwcv and kazal-like domains proteoglycan (testican) 3                      |
| Hs.481133.1.14 | chr4:168050388:168037941 | 168050021 | c | NM_016950    | 8  | CDS  | 50859  | SPOCK3       | sparc/osteonectin, cwcv and kazal-like domains proteoglycan (testican) 3                      |
| Hs.481133.1.15 | chr4:168050388:168037941 | 168050295 | c | NM_016950    | 8  | CDS  | 50859  | SPOCK3       | sparc/osteonectin, cwcv and kazal-like domains proteoglycan (testican) 3                      |
| Hs.481181.1.22 | chr4:170872808:170858078 | 170872485 | c | NM_012224    | 11 | CDS  | 4750   | NEK1         | NIMA (never in mitosis gene a)-related kinase 1                                               |
| Hs.481186.1.27 | chr4:171003148:171008959 | 171003538 | c | NM_001829    | 11 | CDS  | 1182   | CLCN3        | chloride channel 3                                                                            |
| Hs.481342.1.43 | chr4:186945769:186943086 | 186945241 | c | NM_003603    | 10 | CDS  | 8470   | ARGBP2       | Arg/Abl-interacting protein ArgBP2                                                            |
| Hs.481342.1.64 | chr4:187071529:186986915 | 187070248 | c | NM_003603    | 2  | 5UTR | 8470   | ARGBP2       | Arg/Abl-interacting protein ArgBP2                                                            |
| Hs.481361.1.15 | chr4:187463566:187468216 | 187463610 | c | NM_001006655 | 13 | CDS  | 25854  | DKFZP564J102 | DKFZP564J102 protein                                                                          |
| Hs.481542.1.17 | chr5:6803617:6804151     | 6803931   | c | NM_006999    | 10 | CDS  | 11044  | POLS         | polymerase (DNA directed) sigma                                                               |
| Hs.481569.1.15 | chr5:10289589:10288374   | 10289273  | c | NM_199133    | 2  | CDS  | 134145 | LOC134145    | hypothetical protein LOC134145                                                                |
| Hs.481720.1.45 | chr5:16736988:16735123   | 16736539  | c | NM_012334    | 30 | CDS  | 4651   | MYO10        | myosin X                                                                                      |
| Hs.481819.1.13 | chr5:32095220:32096864   | 32095377  | c | NM_015022    | 9  | CDS  | 23037  | PDZK3        | PDZ domain containing 3                                                                       |
| Hs.481865.1.9  | chr5:33787265:33719918   | 33787184  | c | NM_030955    | 3  | CDS  | 81792  | ADAMTS12     | a disintegrin-like and metalloprotease (reprolysin type) with thrombospondin type 1 motif, 12 |
| Hs.481918.1.4  | chr5:36644464:36665308   | 36644729  | c | NM_004172    | 2  | CDS  | 6507   | SLC1A3       | solute carrier family 1 (glial high affinity glutamate transporter), member 3                 |
| Hs.481918.1.6  | chr5:36644464:36665308   | 36645158  | c | NM_004172    | 2  | CDS  | 6507   | SLC1A3       | solute carrier family 1 (glial high affinity glutamate transporter), member 3                 |
| Hs.481927.1.59 | chr5:37099838:37100385   | 37100050  | c | NM_133433    | 46 | CDS  | 25836  | NIPBL        | Nipped-B homolog (Drosophila)                                                                 |
| Hs.481980.1.23 | chr5:39418476:39417476   | 39418210  | c | NM_001343    | 10 | CDS  | 1601   | DAB2         | disabled homolog 2, mitogen-responsive phosphoprotein (Drosophila)                            |
| Hs.481992.1.33 | chr5:41221928:41217419   | 41221812  | c | NM_000065    | 6  | CDS  | 729    | C6           | complement component 6                                                                        |
| Hs.482363.1.9  | chr5:68436300:68439931   | 68436323  | c | NM_022902    | 4  | CDS  | 64924  | SLC30A5      | solute carrier family 30 (zinc transporter), member 5                                         |
| Hs.482497.1.42 | chr5:72237029:72240291   | 72237125  | c | NM_002270    | 24 | 3UTR | 3842   | TNPO1        | transportin 1                                                                                 |
| Hs.482497.1.43 | chr5:72237029:72240291   | 72237163  | c | NM_002270    | 24 | 3UTR | 3842   | TNPO1        | transportin 1                                                                                 |
| Hs.482521.1.34 | chr5:73243157:73272424   | 73243278  | c | AK025816     | 12 | CDS  | 64283  | RGNEF        | Rho-guanine nucleotide exchange factor                                                        |

|                 |                          |           |   |              |    |      |        |           |                                                                                                    |
|-----------------|--------------------------|-----------|---|--------------|----|------|--------|-----------|----------------------------------------------------------------------------------------------------|
| Hs.482625.1.18  | chr5:79094789:79120549   | 79094998  | c | NM_153610    | 9  | CDS  | 202333 | CMYA5     | cardiomyopathy associated 5                                                                        |
| Hs.482660.1.13  | chr5:79771608:79774697   | 79771951  | c | NM_014733    | 4  | CDS  | 9765   | ZFYVE16   | zinc finger, FYVE domain containing 16                                                             |
| Hs.482873.1.14  | chr1:93333877:93332467   | 93333836  | c | NM_016040    | 3  | CDS  | 50999  | TMED5     | transmembrane emp24 protein transport domain containing 5                                          |
| Hs.482910.1.28  | chr5:96271225:96274096   | 96271246  | c | NM_022350    | 14 | CDS  | 64167  | LRAP      | leukocyte-derived arginine aminopeptidase                                                          |
| Hs.482910.1.8   | chr5:96250766:96253758   | 96250948  | c | NM_022350    | 4  | CDS  | 64167  | LRAP      | leukocyte-derived arginine aminopeptidase                                                          |
| Hs.483238.1.21  | chr1:94380120:94379435   | 94379472  | c | NM_004815    | 11 | CDS  | 9411   | ARHGAP29  | Rho GTPase activating protein 29                                                                   |
| Hs.483329.1.17  | chr5:131160421:131108283 | 131159200 | c | NM_001008738 | 1  | CDS  | 96459  | KIAA1961  | KIAA1961 gene                                                                                      |
| Hs.483329.1.7   | chr5:131041294:131036517 | 131041189 | c | NM_001008738 | 12 | CDS  | 96459  | KIAA1961  | KIAA1961 gene                                                                                      |
| Hs.483419.1.19  | chr5:133937352:133942085 | 133939334 | c | NM_015288    | 10 | CDS  | 23338  | PHF15     | PHD finger protein 15                                                                              |
| Hs.483793.1.7   | chr5:148671961:148675576 | 148672131 | c | NM_152406    | 9  | CDS  | 134265 | FLJ36748  | hypothetical protein FLJ36748                                                                      |
| Hs.483877.1.3   | chr5:150685039:150681970 | 150684905 | c | NM_181776    | 8  | CDS  | 153201 | SLC36A2   | solute carrier family 36 (proton/amino acid symporter), member 2                                   |
| Hs.483877.1.6   | chr5:150692977:150685207 | 150692722 | c | NM_181776    | 7  | CDS  | 153201 | SLC36A2   | solute carrier family 36 (proton/amino acid symporter), member 2                                   |
| Hs.483921.1.40  | chr5:154272651:154271652 | 154272651 | c | NM_015465    | 14 | CDS  | 25929  | GEMIN5    | gem (nuclear organelle) associated protein 5                                                       |
| Hs.483944.1.11  | chr5:156849895:156848773 | 156849618 | c | NM_023038    | 19 | CDS  | 8728   | ADAM19    | a disintegrin and metalloproteinase domain 19 (meltrin beta)                                       |
| Hs.484195.1.13  | chr5:172451011:172468232 | 172451139 | c | NM_153607    | 4  | CDS  | 153222 | LOC153222 | adult retina protein                                                                               |
| Hs.484289.1.41  | chr5:176912774:176911739 | 176912500 | c | NM_019057    | 1  | 5UTR | 54540  | FLJ10404  | hypothetical protein FLJ10404                                                                      |
| Hs.484782.1.13  | chr1:10457380:10456026   | 10456791  | c | NM_004401    | 5  | CDS  | 1676   | DFFA      | DNA fragmentation factor, 45kDa, alpha polypeptide                                                 |
| Hs.484782.1.16  | chr1:10457380:10456026   | 10457186  | c | NM_004401    | 5  | CDS  | 1676   | DFFA      | DNA fragmentation factor, 45kDa, alpha polypeptide                                                 |
| Hs.484918.1.17  | chr6:25214565:25205409   | 25213953  | c | D86324       | 7  | CDS  | 8418   | CMAH      | cytidine monophosphate-N-acetylneuraminic acid hydroxylase (CMP-N-acetylneuraminate monooxygenase) |
| Hs.485070.1.4   | chr6:30985296:30985687   | 30985423  | c | NM_001517    | 3  | CDS  | 2968   | GTF2H4    | general transcription factor IIH, polypeptide 4, 52kDa                                             |
| Hs.485158.1.9   | chr6:34619774:34616937   | 34619236  | c | NM_012391    | 2  | CDS  | 25803  | SPDEF     | SAM pointed domain containing ets transcription factor                                             |
| Hs.485196.1.22  | chr6:35500535:35501586   | 35501151  | c | NM_006238    | 8  | CDS  | 5467   | PPARD     | peroxisome proliferative activated receptor, delta                                                 |
| Hs.485426.1.3   | chr6:42905889:42927807   | 42905926  | c | NM_015349    | 5  | CDS  | 23506  | KIAA0240  | KIAA0240                                                                                           |
| Hs.485438.1.11  | chr6:43375783:43376850   | 43375904  | c | NM_006672    | 4  | CDS  | 10864  | SLC22A7   | solute carrier family 22 (organic anion transporter), member 7                                     |
| Hs.485438.1.17  | chr6:43379961:43380386   | 43380196  | c | NM_006672    | 9  | CDS  | 10864  | SLC22A7   | solute carrier family 22 (organic anion transporter), member 7                                     |
| Hs.485471.1.13  | chr6:44479743:44482037   | 44479743  | c | NM_001253    | 6  | CDS  | 988    | CDC5L     | CDC5 cell division cycle 5-like (S. pombe)                                                         |
| Hs.485518.1.11  | chr6:47657761:47671555   | 47657968  | c | NM_012120    | 11 | CDS  | 23607  | CD2AP     | CD2-associated protein                                                                             |
| Hs.485557.1.7   | chr6:52955330:52951350   | 52955303  | c | NM_001512    | 6  | CDS  | 2941   | GSTA4     | glutathione S-transferase A4                                                                       |
| Hs.485616.1.119 | chr6:56597286:56593473   | 56597139  | c | NM_001723    | 22 | CDS  | 667    | DST       | dystonin                                                                                           |
| Hs.485628.1.29  | chr6:57126805:57133840   | 57127063  | c | NM_015555    | 12 | CDS  | 26036  | ZNF451    | zinc finger protein 451                                                                            |
| Hs.485640.1.7   | chr6:57298803:57352657   | 57299120  | c | NM_000947    | 5  | CDS  | 5558   | PRIM2A    | primase, polypeptide 2A, 58kDa                                                                     |
| Hs.485784.1.36  | chr6:76445364:76462239   | 76445414  | c | NM_015571    | 16 | CDS  | 26054  | SENP6     | SUMO1/sentrin specific protease 6                                                                  |
| Hs.485784.1.39  | chr6:76445364:76462239   | 76446301  | c | NM_015571    | 16 | CDS  | 26054  | SENP6     | SUMO1/sentrin specific protease 6                                                                  |
| Hs.485877.1.15  | chr6:86381417:86379361   | 86380970  | c | BC032643     | 11 | CDS  | 10492  | SYNCRIP   | synaptotagmin binding, cytoplasmic RNA interacting protein                                         |
| Hs.4859.1.32    | chr3:158353526:158352733 | 158353368 | c | NM_020307    | 4  | CDS  | 57018  | CCNL1     | cyclin L1                                                                                          |
| Hs.485910.1.11  | chr6:88286019:88285329   | 88285966  | c | NM_020320    | 14 | CDS  | 57038  | RARSL     | arginyl-tRNA synthetase-like                                                                       |
| Hs.486063.1.17  | chr6:106756539:106741245 | 106756314 | c | NM_004849    | 7  | CDS  | 9474   | APG5L     | APG5 autophagy 5-like (S. cerevisiae)                                                              |
| Hs.486228.1.32  | chr6:112019153:112008286 | 112018817 | c | NM_147200    | 3  | CDS  | 10758  | TRAF3IP2  | TRAF3 interacting protein 2                                                                        |
| Hs.486246.1.20  | chr1:113960553:113959462 | 113960431 | c | BC002447     | 13 | CDS  | 10745  | PHTF1     | putative homeodomain transcription factor 1                                                        |



|                |                          |           |   |              |    |      |        |          |                                                                                                    |
|----------------|--------------------------|-----------|---|--------------|----|------|--------|----------|----------------------------------------------------------------------------------------------------|
| Hs.486354.1.2  | chr6:122948852:122996126 | 122948968 | c | NM_181794    | 3  | 5UTR | 5570   | PKIB     | protein kinase (cAMP-dependent, catalytic) inhibitor beta                                          |
| Hs.486357.1.1  | chr6:123152303:123158520 | 123153650 | c | NM_006714    | 1  | CDS  | 10924  | SMPDL3A  | sphingomyelin phosphodiesterase, acid-like 3A                                                      |
| Hs.486458.1.22 | chr6:129974370:129970891 | 129974231 | c | NM_033515    | 8  | CDS  | 93663  | ARHGAP18 | Rho GTPase activating protein 18                                                                   |
| Hs.486696.1.4  | chr6:145990316:145988554 | 145989623 | c | NM_001018041 | 4  | CDS  | 7957   | EPM2A    | epilepsy, progressive myoclonus type 2A, Lafora disease (laforin)                                  |
| Hs.486696.1.9  | chr6:145998073:145990523 | 145997914 | c | NM_001018041 | 3  | CDS  | 7957   | EPM2A    | epilepsy, progressive myoclonus type 2A, Lafora disease (laforin)                                  |
| Hs.486835.1.14 | chr6:151849694:151846480 | 151849484 | c | NM_017909    | 3  | CDS  | 55005  | C6orf96  | chromosome 6 open reading frame 96                                                                 |
| Hs.486835.1.17 | chr6:151858556:151849804 | 151858285 | c | NM_017909    | 2  | CDS  | 55005  | C6orf96  | chromosome 6 open reading frame 96                                                                 |
| Hs.487036.1.21 | chr15:50330878:50328273  | 50330480  | c | NM_018728    | 13 | CDS  | 55930  | MYO5C    | myosin VC                                                                                          |
| Hs.487062.1.73 | chr6:160481547:160487881 | 160481787 | c | NM_000876    | 44 | CDS  | 3482   | IGF2R    | insulin-like growth factor 2 receptor                                                              |
| Hs.487175.1.13 | chr6:167408794:167410445 | 167409110 | c | NM_007045    | 9  | CDS  | 11116  | FGFR1OP  | FGFR1 oncogene partner                                                                             |
| Hs.487325.1.1  | chr1:84353512:84356880   | 84353676  | c | BX647515     | 4  | CDS  | 5567   | PRKACB   | protein kinase, cAMP-dependent, catalytic, beta                                                    |
| Hs.487648.1.38 | chr7:17703225:17688654   | 17701019  | c | NM_015132    | 5  | CDS  | 23161  | SNX13    | sorting nexin 13                                                                                   |
| Hs.487925.1.80 | chr1:142441244:142435787 | 142440808 | c | NM_001002812 | 4  | CDS  | 9659   | PDE4DIP  | phosphodiesterase 4D interacting protein (myomegalin)                                              |
| Hs.487933.1.16 | chr7:32830290:32828723   | 32830057  | c | NM_016489    | 8  | CDS  | 51251  | NT5C3    | 5'-nucleotidase, cytosolic III                                                                     |
| Hs.487994.1.10 | chr7:35968052:36051833   | 35968514  | c | NM_030636    | 2  | CDS  | 80820  | KIAA1706 | KIAA1706 protein                                                                                   |
| Hs.487994.1.18 | chr7:36110037:36111855   | 36110307  | c | NM_030636    | 7  | CDS  | 80820  | KIAA1706 | KIAA1706 protein                                                                                   |
| Hs.487994.1.9  | chr7:35968052:36051833   | 35968262  | c | NM_030636    | 2  | CDS  | 80820  | KIAA1706 | KIAA1706 protein                                                                                   |
| Hs.488007.1.10 | chr7:36353164:36345191   | 36353164  | c | NM_001637    | 16 | CDS  | 313    | AOAH     | acyloxyacyl hydrolase (neutrophil)                                                                 |
| Hs.488051.1.11 | chr20:18071564:18073876  | 18071813  | c | NM_020536    | 2  | CDS  | 57325  | CSRP2BP  | CSRP2 binding protein                                                                              |
| Hs.488181.1.19 | chr7:44488989:44494558   | 44489433  | c | NM_002541    | 9  | CDS  | 4967   | OGDH     | oxoglutarate (alpha-ketoglutarate) dehydrogenase (lipoamide)                                       |
| Hs.488181.1.3  | chr7:44437405:44458165   | 44437917  | c | NM_001003941 | 2  | CDS  | 4967   | OGDH     | oxoglutarate (alpha-ketoglutarate) dehydrogenase (lipoamide)                                       |
| Hs.488293.1.17 | chr7:54998735:54999564   | 54998853  | c | NM_005228    | 10 | CDS  | 1956   | EGFR     | epidermal growth factor receptor (erythroblastic leukemia viral (v-erb-b) oncogene homolog, avian) |
| Hs.488293.1.45 | chr7:55044528:55047157   | 55044978  | c | NM_005228    | 27 | CDS  | 1956   | EGFR     | epidermal growth factor receptor (erythroblastic leukemia viral (v-erb-b) oncogene homolog, avian) |
| Hs.488478.1.16 | chr7:65860273:65862362   | 65860472  | c | NM_017994    | 5  | CDS  | 55069  | FLJ10099 | hypothetical protein FLJ10099                                                                      |
| Hs.488945.1.10 | chr7:77529910:77475162   | 77529741  | c | NM_012301    | 10 | CDS  | 9863   | MAGI2    | membrane associated guanylate kinase, WW and PDZ domain containing 2                               |
| Hs.488945.1.11 | chr7:77529910:77475162   | 77529766  | c | NM_012301    | 10 | CDS  | 9863   | MAGI2    | membrane associated guanylate kinase, WW and PDZ domain containing 2                               |
| Hs.489142.1.6  | chr7:93675584:93678518   | 93675646  | c | NM_000089    | 6  | CDS  | 1278   | COL1A2   | collagen, type I, alpha 2                                                                          |
| Hs.489353.1.34 | chr1:109178879:109184364 | 109179023 | c | NM_013296    | 14 | CDS  | 29899  | GPSM2    | G-protein signalling modulator 2 (AGS3-like, C. elegans)                                           |
| Hs.489603.1.3  | chr7:104848259:104845002 | 104847872 | c | AK097574     | 10 | CDS  | 222255 | ATXN7L4  | ataxin 7-like 4                                                                                    |
| Hs.489603.1.8  | chr7:104854597:104852496 | 104854501 | c | BC003517     | 2  | CDS  | 222255 | ATXN7L4  | ataxin 7-like 4                                                                                    |
| Hs.489615.1.19 | chr7:105495984:105488902 | 105495898 | c | NM_005746    | 8  | CDS  | 10135  | PBEF1    | pre-B-cell colony enhancing factor 1                                                               |
| Hs.489646.1.15 | chr7:107165751:107164016 | 107165725 | c | NM_002291    | 29 | CDS  | 3912   | LAMB1    | laminin, beta 1                                                                                    |
| Hs.489646.1.21 | chr7:107169810:107166774 | 107169744 | c | NM_002291    | 27 | CDS  | 3912   | LAMB1    | laminin, beta 1                                                                                    |
| Hs.489786.1.1  | chr7:116774352:116776020 | 116774714 | c | NM_000492    | 8  | CDS  | 1080   | CFTR     | cystic fibrosis transmembrane conductance regulator, ATP-binding cassette (sub-family C, member 7) |
| Hs.489786.1.10 | chr7:116861776:116876442 | 116861912 | c | NM_000492    | 22 | CDS  | 1080   | CFTR     | cystic fibrosis transmembrane conductance regulator, ATP-binding cassette (sub-family C, member 7) |

|                 |                          |           |   |              |    |      |        |          |                                                                                                    |
|-----------------|--------------------------|-----------|---|--------------|----|------|--------|----------|----------------------------------------------------------------------------------------------------|
| Hs.489786.1.11  | chr7:116861776:116876442 | 116862069 | c | NM_000492    | 22 | CDS  | 1080   | CFTR     | cystic fibrosis transmembrane conductance regulator, ATP-binding cassette (sub-family C, member 7) |
| Hs.489988.1.9   | chr7:128716839:128719370 | 128717423 | c | NM_020704    | 20 | CDS  | 57464  | FAM40B   | family with sequence similarity 40, member B                                                       |
| Hs.490181.1.18  | chr7:133441529:133438474 | 133441316 | c | NM_032826    | 8  | CDS  | 84912  | SLC35B4  | solute carrier family 35, member B4                                                                |
| Hs.490203.1.18  | chr7:134083244:134089513 | 134083685 | c | NM_004342    | 6  | CDS  | 800    | CALD1    | caldesmon 1                                                                                        |
| Hs.490224.1.18  | chr7:134535924:134530902 | 134535639 | c | NM_001008225 | 10 | CDS  | 4850   | CNOT4    | CCR4-NOT transcription complex, subunit 4                                                          |
| Hs.490273.1.14  | chr7:137054991:137050438 | 137054825 | c | NM_194071    | 4  | CDS  | 64764  | CREB3L2  | cAMP responsive element binding protein 3-like 2                                                   |
| Hs.490366.1.31  | chr7:139987592:139961980 | 139987396 | c | NM_004333    | 3  | CDS  | 673    | BRAF     | v-raf murine sarcoma viral oncogene homolog B1                                                     |
| Hs.490454.1.18  | chr7:143970300:143900693 | 143969874 | c | NM_022445    | 2  | CDS  | 27010  | TPK1     | thiamin pyrophosphokinase 1                                                                        |
| Hs.490695.1.2   | chr7:155058826:155066728 | 155059061 | c | NM_001008408 | 3  | CDS  | 155435 | RBM33    | RNA binding motif protein 33                                                                       |
| Hs.490715.1.9   | chr7:155946889:155949710 | 155947091 | c | NM_030936    | 4  | CDS  | 140545 | RNF32    | ring finger protein 32                                                                             |
| Hs.490745.1.13  | chr7:156677782:156701964 | 156678086 | c | NM_058246    | 8  | CDS  | 10049  | DNAJB6   | DnaJ (Hsp40) homolog, subfamily B, member 6                                                        |
| Hs.490789.1.23  | chr7:156887405:156870309 | 156887273 | c | NM_002847    | 17 | CDS  | 5799   | PTPRN2   | protein tyrosine phosphatase, receptor type, N polypeptide 2                                       |
| Hs.490795.1.21  | chr7:158029214:158027776 | 158028766 | c | NM_020728    | 19 | CDS  | 57488  | FAM62B   | family with sequence similarity 62 (C2 domain containing) member B                                 |
| Hs.490817.1.18  | chr7:158389001:158350746 | 158388793 | c | AK131406     | 1  | CDS  | 7434   | VIPR2    | vasoactive intestinal peptide receptor 2                                                           |
| Hs.490892.1.16  | chr8:6290477:6300071     | 6290537   | c | NM_024596    | 5  | CDS  | 79648  | MCPH1    | microcephaly, primary autosomal recessive 1                                                        |
| Hs.490892.1.18  | chr8:6290477:6300071     | 6291496   | c | NM_024596    | 5  | CDS  | 79648  | MCPH1    | microcephaly, primary autosomal recessive 1                                                        |
| Hs.491143.1.17  | chr8:17793469:17787361   | 17793012  | c | NM_201552    | 2  | 5UTR | 2267   | FGL1     | fibrinogen-like 1                                                                                  |
| Hs.491148.1.22  | chr8:17857443:17858392   | 17857687  | c | NM_006197    | 10 | CDS  | 5108   | PCM1     | pericentriolar material 1                                                                          |
| Hs.491148.1.23  | chr8:17857443:17858392   | 17857739  | c | NM_006197    | 10 | CDS  | 5108   | PCM1     | pericentriolar material 1                                                                          |
| Hs.491148.1.97  | chr8:17916630:17927149   | 17916668  | c | NM_006197    | 36 | CDS  | 5108   | PCM1     | pericentriolar material 1                                                                          |
| Hs.491223.1.2   | chr8:22007976:22009793   | 22008345  | c | NM_022749    | 2  | 5UTR | 64760  | RAI16    | retinoic acid induced 16                                                                           |
| Hs.491351.1.74  | chr17:55122855:55125870  | 55122969  | c | NM_004859    | 31 | CDS  | 1213   | CLTC     | clathrin, heavy polypeptide (Hc)                                                                   |
| Hs.49143.1.9    | chr16:14241843:14246885  | 14242783  | c | NM_014048    | 10 | CDS  | 57496  | MKL2     | MKL/myocardin-like 2                                                                               |
| Hs.491577.1.27  | chr8:42025052:41964239   | 42024835  | c | NM_006766    | 2  | CDS  | 7994   | MYST3    | MYST histone acetyltransferase (monocytic leukemia) 3                                              |
| Hs.491682.1.104 | chr8:49002883:49002467   | 49002543  | c | NM_006904    | 20 | CDS  | 5591   | PRKDC    | protein kinase, DNA-activated, catalytic polypeptide                                               |
| Hs.492236.1.16  | chr1:157001186:157000572 | 157000786 | c | NM_015726    | 13 | CDS  | 50717  | WDR42A   | WD repeat domain 42A                                                                               |
| Hs.492236.1.34  | chr1:157022559:157021611 | 157022085 | c | NM_015726    | 4  | CDS  | 50717  | WDR42A   | WD repeat domain 42A                                                                               |
| Hs.492445.1.29  | chr8:103348350:103346683 | 103347925 | c | NM_015902    | 52 | CDS  | 51366  | EDD1     | E3 ubiquitin protein ligase, HECT domain containing, 1                                             |
| Hs.492445.1.81  | chr8:103385446:103381556 | 103385232 | c | NM_015902    | 22 | CDS  | 51366  | EDD1     | E3 ubiquitin protein ligase, HECT domain containing, 1                                             |
| Hs.492925.1.6   | chr1:159499365:159501190 | 159499590 | c | NM_016371    | 4  | CDS  | 51478  | HSD17B7  | hydroxysteroid (17-beta) dehydrogenase 7                                                           |
| Hs.493516.1.29  | chr9:15476003:15469686   | 15475772  | c | NM_021144    | 5  | CDS  | 11168  | PSIP1    | PC4 and SFRS1 interacting protein 1                                                                |
| Hs.493639.1.14  | chr9:27551582:27550298   | 27550499  | c | NM_018325    | 5  | CDS  | 203228 | C9orf72  | chromosome 9 open reading frame 72                                                                 |
| Hs.493767.1.1   | chr9:34326340:34328710   | 34326387  | c | NM_001161    | 2  | 5UTR | 318    | NUDT2    | nudix (nucleoside diphosphate linked moiety X)-type motif 2                                        |
| Hs.494146.1.22  | chr9:71549064:71545295   | 71548887  | c | NM_013390    | 18 | CDS  | 23670  | TMEM2    | transmembrane protein 2                                                                            |
| Hs.494186.1.23  | chr9:74932477:74927621   | 74930954  | c | NM_017881    | 1  | 5UTR | 54981  | C9orf95  | chromosome 9 open reading frame 95                                                                 |
| Hs.494186.1.25  | chr9:74932477:74927621   | 74932045  | c | NM_017881    | 1  | 5UTR | 54981  | C9orf95  | chromosome 9 open reading frame 95                                                                 |
| Hs.49421.1.13   | chr1:67049073:67040007   | 67048950  | c | NM_024763    | 6  | CDS  | 79819  | WDR78    | WD repeat domain 78                                                                                |
| Hs.49421.1.19   | chr1:67082904:67071118   | 67082567  | c | NM_024763    | 2  | CDS  | 79819  | WDR78    | WD repeat domain 78                                                                                |
| Hs.49421.1.7    | chr1:67015413:67013482   | 67015307  | c | NM_024763    | 10 | CDS  | 79819  | WDR78    | WD repeat domain 78                                                                                |
| Hs.494326.1.24  | chr1:166088106:166096789 | 166088267 | c | NM_003666    | 7  | 3UTR | 8548   | BLZF1    | basic leucine zipper nuclear factor 1 (JEM-1)                                                      |
| Hs.494326.1.7   | chr1:166077876:166079225 | 166078279 | c | NM_003666    | 3  | CDS  | 8548   | BLZF1    | basic leucine zipper nuclear factor 1 (JEM-1)                                                      |
| Hs.494552.1.4   | chr9:95846539:95854061   | 95846700  | c | NM_020207    | 3  | CDS  | 56959  | C9orf102 | chromosome 9 open reading frame 102                                                                |

|                |                          |           |   |              |    |      |        |          |                                                                                                      |
|----------------|--------------------------|-----------|---|--------------|----|------|--------|----------|------------------------------------------------------------------------------------------------------|
| Hs.494595.1.7  | chr9:97446563:97444605   | 97445906  | c | NM_139246    | 9  | CDS  | 158427 | C9orf97  | chromosome 9 open reading frame 97                                                                   |
| Hs.494700.1.28 | chr9:105225196:105227257 | 105225260 | c | NM_022109    | 14 | CDS  | 23446  | CDW92    | CDW92 antigen                                                                                        |
| Hs.494751.1.9  | chr1:168832086:168954369 | 168832086 | c | NM_015569    | 14 | CDS  | 26052  | DNM3     | dynamins 3                                                                                           |
| Hs.494892.1.3  | chr9:114011298:114020124 | 114011857 | c | NM_032888    | 3  | CDS  | 85301  | COL27A1  | collagen, type XXVII, alpha 1                                                                        |
| Hs.494928.1.29 | chr9:116077471:116107689 | 116077862 | c | NM_002581    | 7  | CDS  | 5069   | PAPPA    | pregnancy-associated plasma protein A, pappalysin 1                                                  |
| Hs.495035.1.12 | chr1:170435083:170452559 | 170435223 | c | NM_014458    | 3  | CDS  | 27252  | KLHL20   | kelch-like 20 (Drosophila)                                                                           |
| Hs.495138.1.25 | chr9:125401465:125385002 | 125400947 | c | NM_001006617 | 6  | CDS  | 79109  | MAPKAP1  | mitogen-activated protein kinase associated protein 1                                                |
| Hs.495188.1.15 | chr9:127320797:127321215 | 127320797 | c | NM_001005373 | 12 | CDS  | 90678  | LRSAM1   | leucine rich repeat and sterile alpha motif containing 1                                             |
| Hs.495417.1.14 | chr9:132958884:132959348 | 132959006 | c | NM_012087    | 6  | CDS  | 9328   | GTF3C5   | general transcription factor IIIC, polypeptide 5, 63kDa                                              |
| Hs.495605.1.17 | chrX:2644777:2649604     | 2645069   | c | U82164       | 9  | 3UTR | 4267   | CD99     | CD99 antigen                                                                                         |
| Hs.495728.1.12 | chrX:15233627:15203771   | 15231395  | c | NM_001018109 | 5  | CDS  | 8544   | PIR      | pirin (iron-binding nuclear protein)                                                                 |
| Hs.495755.1.7  | chrX:16627023:16623719   | 16626771  | c | NM_002893    | 10 | CDS  | 5931   | RBBP7    | retinoblastoma binding protein 7                                                                     |
| Hs.495834.1.1  | chrX:21876927:21889241   | 21877138  | c | NM_000444    | 9  | CDS  | 5251   | PHEX     | phosphate regulating endopeptidase homolog, X-linked (hypophosphatemia, vitamin D resistant rickets) |
| Hs.495880.1.8  | chrX:24505711:24510143   | 24506403  | c | NM_016937    | 15 | CDS  | 5422   | POLA     | polymerase (DNA directed), alpha                                                                     |
| Hs.495897.1.4  | chr1:173569636:173565315 | 173569611 | c | NM_004319    | 22 | CDS  | 460    | ASTN     | astrotactin                                                                                          |
| Hs.495912.1.33 | chrX:31507404:31457361   | 31507219  | c | NM_000109    | 52 | CDS  | 1756   | DMD      | dystrophin (muscular dystrophy, Duchenne and Becker types)                                           |
| Hs.495912.1.50 | chrX:32295781:32279617   | 32294370  | c | NM_000109    | 18 | CDS  | 1756   | DMD      | dystrophin (muscular dystrophy, Duchenne and Becker types)                                           |
| Hs.495984.1.36 | chrX:41275945:41252169   | 41275608  | c | NM_003688    | 8  | CDS  | 8573   | CASK     | calcium/calmodulin-dependent serine protein kinase (MAGUK family)                                    |
| Hs.496068.1.31 | chrX:46843123:46844219   | 46843337  | c | NM_006201    | 14 | CDS  | 5127   | PCTK1    | PCTAIRE protein kinase 1                                                                             |
| Hs.496222.1.10 | chr1:175565745:175554580 | 175565609 | c | NM_004673    | 3  | CDS  | 9068   | ANGPTL1  | angiopoietin-like 1                                                                                  |
| Hs.497039.1.16 | chr1:179817696:179818111 | 179817778 | c | NM_002293    | 8  | CDS  | 3915   | LAMC1    | laminin, gamma 1 (formerly LAMB2)                                                                    |
| Hs.497039.1.56 | chr1:179838620:179841195 | 179838697 | c | NM_002293    | 26 | CDS  | 3915   | LAMC1    | laminin, gamma 1 (formerly LAMB2)                                                                    |
| Hs.497123.1.12 | chr1:179984786:179979422 | 179983665 | c | NM_015039    | 7  | CDS  | 23057  | NMNAT2   | nicotinamide nucleotide adenyltransferase 2                                                          |
| Hs.497183.1.34 | chr1:182007802:182007415 | 182007539 | c | NM_016389    | 7  | CDS  | 10625  | IVNS1ABP | influenza virus NS1A binding protein                                                                 |
| Hs.497417.1.27 | chr14:74207217:74206583  | 74207124  | c | NM_014821    | 13 | CDS  | 9870   | KIAA0317 | KIAA0317                                                                                             |
| Hs.497520.1.8  | chr1:202320750:202319859 | 202320053 | c | NM_001973    | 3  | CDS  | 2005   | ELK4     | ELK4, ETS-domain protein (SRF accessory protein 1)                                                   |
| Hs.497520.1.9  | chr1:202320750:202319859 | 202320486 | c | NM_001973    | 3  | CDS  | 2005   | ELK4     | ELK4, ETS-domain protein (SRF accessory protein 1)                                                   |
| Hs.497575.1.6  | chr1:202968327:202977641 | 202968737 | c | NM_015326    | 6  | CDS  | 23380  | SRGAP2   | SLIT-ROBO Rho GTPase activating protein 2                                                            |
| Hs.497581.1.12 | chr1:203157461:203155538 | 203157449 | c | AF262403     | 11 | CDS  | 1939   | LGTN     | ligatin                                                                                              |
| Hs.497599.1.10 | chr14:99878487:99873293  | 99878140  | c | NM_004184    | 9  | CDS  | 7453   | WARS     | tryptophanyl-tRNA synthetase                                                                         |
| Hs.497692.1.18 | chr1:209344108:209301339 | 209343679 | c | NM_015471    | 4  | CDS  | 25936  | C1orf48  | chromosome 1 open reading frame 48                                                                   |
| Hs.497806.1.3  | chr1:217142856:217160067 | 217144631 | c | NM_018650    | 3  | CDS  | 4139   | MARK1    | MAP/microtubule affinity-regulating kinase 1                                                         |
| Hs.497893.1.29 | chr1:222013634:222011744 | 222013481 | c | NM_001008493 | 5  | CDS  | 55740  | ENAH     | enabled homolog (Drosophila)                                                                         |
| Hs.498543.1.14 | chr10:5991264:5992906    | 5991447   | c | NM_032807    | 6  | CDS  | 84893  | FBXO18   | F-box protein, helicase, 18                                                                          |
| Hs.498548.1.18 | chr10:6194331:6195476    | 6194971   | c | NM_032905    | 8  | CDS  | 84991  | RBM17    | RNA binding motif protein 17                                                                         |
| Hs.498740.1.13 | chr10:13562904:13534665  | 13562891  | c | NM_152751    | 6  | CDS  | 222389 | C10orf30 | chromosome 10 open reading frame 30                                                                  |
| Hs.499029.1.21 | chr10:22936861:22920717  | 22936745  | c | NM_005028    | 3  | CDS  | 5305   | PIP5K2A  | phosphatidylinositol-4-phosphate 5-kinase, type II, alpha                                            |
| Hs.499145.1.44 | chr10:27474362:27471421  | 27474354  | c | NM_014263    | 3  | CDS  | 10730  | YME1L1   | YME1-like 1 (S. cerevisiae)                                                                          |
| Hs.499158.1.6  | chr22:36337505:36338954  | 36338345  | c | NM_001001560 | 3  | CDS  | 26088  | GGA1     | golgi associated, gamma adaptin ear containing, ARF binding protein 1                                |
| Hs.499222.1.16 | chr16:54404315:54402424  | 54403616  | c | S73751       | 10 | CDS  | 1066   | CES1     | carboxylesterase 1 (monocyte/macrophage serine esterase 1)                                           |

|                 |                           |           |   |              |    |     |        |          |                                                                                                                                                |
|-----------------|---------------------------|-----------|---|--------------|----|-----|--------|----------|------------------------------------------------------------------------------------------------------------------------------------------------|
| Hs.499483.1.27  | chr16:82722207:82721538   | 82722081  | c | NM_031463    | 3  | CDS | 83693  | HSDL1    | hydroxysteroid dehydrogenase like 1                                                                                                            |
| Hs.499643.1.15  | chr10:52271627:52266079   | 52271590  | c | NM_014576    | 5  | CDS | 29974  | ACF      | apobec-1 complementation factor                                                                                                                |
| Hs.499705.1.13  | chr10:60684113:60682765   | 60683483  | c | NM_001001971 | 9  | CDS | 220965 | FAM13C1  | family with sequence similarity 13, member C1                                                                                                  |
| Hs.499758.1.8   | chr17:12773089:12785097   | 12773423  | c | NM_014859    | 7  | CDS | 9912   | KIAA0672 | KIAA0672 gene product                                                                                                                          |
| Hs.499941.1.2   | chr10:70913639:70914902   | 70913854  | c | NM_012339    | 2  | CDS | 23555  | TSPAN15  | tetraspanin 15                                                                                                                                 |
| Hs.49998.1.20   | chr10:88475990:88482623   | 88476188  | c | NM_007078    | 12 | CDS | 11155  | LDB3     | LIM domain binding 3                                                                                                                           |
| Hs.500066.1.19  | chr17:32899759:32901670   | 32899868  | c | NM_001488    | 11 | CDS | 6871   | TADA2L   | transcriptional adaptor 2 (ADA2 homolog, yeast)-like protein phosphatase 3 (formerly 2B), catalytic subunit, beta isoform (calcineurin A beta) |
| Hs.500067.1.30  | chr10:74897316:74884254   | 74896725  | c | NM_021132    | 9  | CDS | 5532   | PPP3CB   | thyroid hormone receptor interactor 4                                                                                                          |
| Hs.500340.1.21  | chr15:62503408:62504791   | 62503618  | c | NM_016213    | 10 | CDS | 9325   | TRIP4    | fer-1-like 3, myoferlin (C. elegans)                                                                                                           |
| Hs.500572.1.75  | chr10:95146993:95145972   | 95146929  | c | NM_013451    | 15 | CDS | 26509  | FER1L3   | cyclin M2                                                                                                                                      |
| Hs.500903.1.1   | chr10:104669849:104799453 | 104669871 | c | NM_017649    | 1  | CDS | 54805  | CNNM2    | NA                                                                                                                                             |
| Hs.501048.1.4   | chr18:31097474:31097203   | 31097258  | c | AK131291     | 3  | CDS | NA     | NA       | NA                                                                                                                                             |
| Hs.501127.1.13  | chr10:116921041:116965444 | 116921111 | c | NM_207303    | 8  | CDS | 26033  | ATRNL1   | atractin-like 1                                                                                                                                |
| Hs.501203.1.9   | chr10:121326581:121326253 | 121326479 | c | NM_003252    | 10 | CDS | 7073   | TIAL1    | TIA1 cytotoxic granule-associated RNA binding protein-like 1                                                                                   |
| Hs.501252.1.2   | chr10:123771520:123799942 | 123771736 | c | NM_206861    | 2  | CDS | 10579  | TACC2    | transforming, acidic coiled-coil containing protein 2                                                                                          |
| Hs.501376.1.24  | chr10:127485971:127476705 | 127485709 | c | NM_000375    | 6  | CDS | 7390   | UROS     | uroporphyrinogen III synthase (congenital erythropoietic porphyria)                                                                            |
| Hs.501928.1.22  | chr11:12214369:12217558   | 12214738  | c | NM_014632    | 16 | CDS | 9645   | MICAL2   | microtubule associated monooxygenase, calponin and LIM domain containing 2                                                                     |
| Hs.501991.1.15  | chr11:13691157:13692631   | 13691207  | c | NM_032228    | 8  | CDS | 84188  | MLSTD2   | male sterility domain containing 2                                                                                                             |
| Hs.502235.1.12  | chr11:31771561:31768985   | 31771329  | c | NM_000280    | 11 | CDS | 5080   | PAX6     | paired box gene 6 (aniridia, keratitis)                                                                                                        |
| Hs.502302.1.22  | chr11:34446519:34449080   | 34446668  | c | NM_001752    | 11 | CDS | 847    | CAT      | catalase                                                                                                                                       |
| Hs.502328.1.11  | chr11:35168189:35192974   | 35168218  | c | NM_001001391 | 5  | CDS | 960    | CD44     | CD44 antigen (homing function and Indian blood group system)                                                                                   |
| Hs.502705.1.8   | chr11:60421893:60415312   | 60421598  | c | NM_014502    | 15 | CDS | 27339  | PRPF19   | PRP19/PSO4 pre-mRNA processing factor 19 homolog (S. cerevisiae)                                                                               |
| Hs.502745.1.24  | chr11:61387835:61389199   | 61388277  | c | NM_004265    | 10 | CDS | 9415   | FADS2    | fatty acid desaturase 2                                                                                                                        |
| Hs.503001.1.15  | chr11:67691024:67683215   | 67690336  | c | NM_017635    | 10 | CDS | 51111  | SUV420H1 | suppressor of variegation 4-20 homolog 1 (Drosophila)                                                                                          |
| Hs.503137.1.43  | chr11:70887223:70889995   | 70887422  | c | NM_018161    | 20 | CDS | 55191  | NADSYN1  | NAD synthetase 1                                                                                                                               |
| Hs.503178.1.103 | chr2:54804877:54806391    | 54805027  | c | NM_003128    | 33 | CDS | 6711   | SPTBN1   | spectrin, beta, non-erythrocytic 1                                                                                                             |
| Hs.503178.1.91  | chr2:54798788:54803240    | 54798971  | c | NM_003128    | 31 | CDS | 6711   | SPTBN1   | spectrin, beta, non-erythrocytic 1                                                                                                             |
| Hs.503222.1.20  | chr11:73096112:73068414   | 73095947  | c | NM_002869    | 6  | CDS | 5870   | RAB6A    | RAB6A, member RAS oncogene family                                                                                                              |
| Hs.503368.1.16  | chr11:77501343:77498276   | 77501078  | c | NM_001007027 | 8  | CDS | 79053  | ALG8     | asparagine-linked glycosylation 8 homolog (yeast, alpha-1,3-glucosyltransferase)                                                               |
| Hs.503490.1.7   | chr2:97206129:97210497    | 97206256  | c | NM_198555    | 3  | CDS | 375248 | ANKRD36  | ankyrin repeat domain 36                                                                                                                       |
| Hs.503500.1.6   | chr11:7466223:7487204     | 7466831   | c | NM_198474    | 2  | CDS | 283298 | OLFML1   | olfactomedin-like 1                                                                                                                            |
| Hs.503560.1.7   | chr11:89531055:89532054   | 89531573  | c | NM_005467    | 7  | CDS | 10003  | NAALAD2  | N-acetylated alpha-linked acidic dipeptidase 2                                                                                                 |
| Hs.503560.1.9   | chr11:89541809:89542884   | 89542498  | c | NM_005467    | 12 | CDS | 10003  | NAALAD2  | N-acetylated alpha-linked acidic dipeptidase 2                                                                                                 |
| Hs.503776.1.6   | chr2:135572122:135556219  | 135571494 | c | NM_001018046 | 8  | CDS | 80122  | YSK4     | Yeast Sps1/Ste20-related kinase 4 (S. cerevisiae)                                                                                              |
| Hs.503776.1.7   | chr2:135572122:135556219  | 135572016 | c | NM_001018046 | 8  | CDS | 80122  | YSK4     | Yeast Sps1/Ste20-related kinase 4 (S. cerevisiae)                                                                                              |
| Hs.503891.1.21  | chr11:113189816:113188437 | 113189687 | c | NM_020886    | 15 | CDS | 57646  | USP28    | ubiquitin specific protease 28                                                                                                                 |
| Hs.504009.1.31  | chr11:116785892:116786753 | 116786627 | c | NM_014956    | 30 | CDS | 22897  | Cep164   | KIAA1052 protein                                                                                                                               |
| Hs.504062.1.11  | chr11:118004577:118007133 | 118004793 | c | NM_015157    | 7  | CDS | 23187  | PHLDB1   | pleckstrin homology-like domain, family B, member 1                                                                                            |
| Hs.504062.1.12  | chr11:118004577:118007133 | 118004855 | c | NM_015157    | 7  | CDS | 23187  | PHLDB1   | pleckstrin homology-like domain, family B, member 1                                                                                            |

|                |                           |           |   |              |    |      |        |           |                                                                                                          |
|----------------|---------------------------|-----------|---|--------------|----|------|--------|-----------|----------------------------------------------------------------------------------------------------------|
| Hs.504091.1.28 | chr11:118509140:118510003 | 118509530 | c | NM_015517    | 10 | CDS  | 25988  | MIZF      | MBD2 (methyl-CpG-binding protein)-interacting zinc finger protein                                        |
| Hs.504096.1.6  | chr11:118663867:118672837 | 118663987 | c | NM_005188    | 12 | CDS  | 867    | CBL       | Cas-Br-M (murine) ecotropic retroviral transforming sequence                                             |
| Hs.504317.1.3  | chr2:230735965:230727753  | 230735889 | c | NM_152527    | 4  | CDS  | 151473 | SLC16A14  | solute carrier family 16 (monocarboxylic acid transporters), member 14                                   |
| Hs.504352.1.11 | chr11:131689808:131710149 | 131690174 | c | NM_016522    | 6  | CDS  | 50863  | HNT       | neurotrimin                                                                                              |
| Hs.504398.1.20 | chr12:239277:223241       | 238432    | c | NM_016615    | 2  | CDS  | 6540   | SLC6A13   | solute carrier family 6 (neurotransmitter transporter, GABA), member 13                                  |
| Hs.504432.1.5  | chr12:806690:809429       | 806928    | c | NM_018979    | 3  | CDS  | 65125  | WNK1      | WNK lysine deficient protein kinase 1                                                                    |
| Hs.504641.1.36 | chr12:7542730:7540997     | 7542230   | c | NM_004244    | 4  | CDS  | 9332   | CD163     | CD163 antigen                                                                                            |
| Hs.50499.1.4   | chr5:95020076:95018565    | 95019775  | c | NM_031952    | 5  | 3UTR | 83890  | SPATA9    | spermatogenesis associated 9                                                                             |
| Hs.50499.1.6   | chr5:95020076:95018565    | 95020061  | c | NM_031952    | 5  | 3UTR | 83890  | SPATA9    | spermatogenesis associated 9                                                                             |
| Hs.505004.1.7  | chr20:62165182:62168272   | 62165920  | c | NM_003195    | 1  | CDS  | 6919   | TCEA2     | transcription elongation factor A (SII), 2                                                               |
| Hs.505202.1.22 | chr12:32382018:32382986   | 32382363  | c | NM_001714    | 7  | CDS  | 636    | BICD1     | bicaudal D homolog 1 (Drosophila)                                                                        |
| Hs.505202.1.23 | chr12:32382018:32382986   | 32382743  | c | NM_001714    | 7  | CDS  | 636    | BICD1     | bicaudal D homolog 1 (Drosophila)                                                                        |
| Hs.505202.1.25 | chr12:32411947:32421740   | 32412263  | c | NM_001003398 | 8  | 3UTR | 636    | BICD1     | bicaudal D homolog 1 (Drosophila)                                                                        |
| Hs.505545.1.11 | chr12:49668431:49661854   | 49667994  | c | AF064484     | 16 | CDS  | 4891   | SLC11A2   | solute carrier family 11 (proton-coupled divalent metal ion transporters), member 2                      |
| Hs.505871.1.12 | chr12:62902049:62896011   | 62901749  | c | NM_152440    | 1  | CDS  | 144577 | FLJ32549  | hypothetical protein FLJ32549                                                                            |
| Hs.506222.1.7  | chr12:81335039:81352973   | 81335334  | c | NM_032230    | 8  | CDS  | 84190  | FLJ22789  | hypothetical protein FLJ22789                                                                            |
| Hs.506381.1.7  | chr12:93982023:93980891   | 93981787  | c | NM_018351    | 19 | CDS  | 55785  | FGD6      | FYVE, RhoGEF and PH domain containing 6                                                                  |
| Hs.506458.1.15 | chr12:97669287:97647769   | 97669240  | c | NM_020140    | 9  | CDS  | 56899  | EB-1      | E2a-Pbx1-associated protein                                                                              |
| Hs.50649.1.8   | chr2:24215339:24214162    | 24215270  | c | NM_004881    | 3  | CDS  | 9540   | TP53I3    | tumor protein p53 inducible protein 3                                                                    |
| Hs.506663.1.55 | chr12:107457085:107445458 | 107456460 | c | NM_014706    | 1  | CDS  | 9733   | SART3     | squamous cell carcinoma antigen recognised by T cells 3                                                  |
| Hs.506720.1.5  | chr3:127208654:127208106  | 127208357 | c | NM_001008485 | 11 | CDS  | 54946  | SLC41A3   | solute carrier family 41, member 3                                                                       |
| Hs.506759.1.48 | chr12:109246847:109250816 | 109247187 | c | NM_001681    | 20 | CDS  | 488    | ATP2A2    | ATPase, Ca++ transporting, cardiac muscle, slow twitch 2                                                 |
| Hs.506759.1.51 | chr12:109246847:109250816 | 109247311 | c | NM_001681    | 20 | CDS  | 488    | ATP2A2    | ATPase, Ca++ transporting, cardiac muscle, slow twitch 2                                                 |
| Hs.506852.1.16 | chr12:111387154:111388966 | 111387447 | c | NM_002834    | 11 | CDS  | 5781   | PTPN11    | protein tyrosine phosphatase, non-receptor type 11 (Noonan syndrome 1)                                   |
| Hs.506985.1.22 | chr12:116935510:116934884 | 116935356 | c | NM_018639    | 8  | CDS  | 55884  | WSB2      | WD repeat and SOCS box-containing 2                                                                      |
| Hs.507175.1.25 | chr12:122212050:122211747 | 122211898 | c | NM_022782    | 6  | CDS  | 10198  | MPHOSPH9  | M-phase phosphoprotein 9                                                                                 |
| Hs.507307.1.10 | chr12:131145732:131155851 | 131145787 | c | NM_015409    | 12 | CDS  | 57634  | EP400     | E1A binding protein p400                                                                                 |
| Hs.507307.1.38 | chr12:131195087:131195445 | 131195327 | c | NM_015409    | 35 | CDS  | 57634  | EP400     | E1A binding protein p400                                                                                 |
| Hs.507333.1.24 | chr12:132000242:131995486 | 131999888 | c | AB027133     | 4  | CDS  | 2802   | GOLGA3    | golgi autoantigen, golgin subfamily a, 3                                                                 |
| Hs.507336.1.34 | chr12:132074131:132064591 | 132073816 | c | NM_018223    | 2  | CDS  | 55743  | CHFR      | checkpoint with forkhead and ring finger domains                                                         |
| Hs.507433.1.25 | chr13:19509050:19523572   | 19509205  | c | NM_003453    | 13 | CDS  | 7750   | ZNF198    | zinc finger protein 198                                                                                  |
| Hs.50749.1.16  | chr7:99161282:99159054    | 99161012  | c | NM_033017    | 1  | CDS  | 89122  | TRIM4     | tripartite motif-containing 4                                                                            |
| Hs.507621.1.57 | chr13:27939039:27910483   | 27938600  | c | NM_002019    | 3  | CDS  | 2321   | FLT1      | fms-related tyrosine kinase 1 (vascular endothelial growth factor/vascular permeability factor receptor) |
| Hs.507621.1.64 | chr13:27966916:27939755   | 27965435  | c | NM_002019    | 1  | CDS  | 2321   | FLT1      | fms-related tyrosine kinase 1 (vascular endothelial growth factor/vascular permeability factor receptor) |
| Hs.507669.1.36 | chr13:31750686:31761769   | 31750709  | c | NM_023037    | 58 | CDS  | 10129  | 13CDNA73  | hypothetical protein CG003                                                                               |
| Hs.507669.1.38 | chr13:31750686:31761769   | 31750976  | c | NM_023037    | 58 | CDS  | 10129  | 13CDNA73  | hypothetical protein CG003                                                                               |
| Hs.507704.1.17 | chr13:32590201:32585069   | 32589685  | c | NM_052851    | 8  | CDS  | 90627  | STARD13   | START domain containing 13                                                                               |
| Hs.507783.1.8  | chr13:38516319:38519176   | 38516347  | c | NM_001012754 | 5  | CDS  | 387921 | LOC387921 | similar to RIKEN cDNA 8030451K01                                                                         |
| Hs.507948.1.12 | chr13:44965623:44968287   | 44966072  | c | NM_031431    | 12 | CDS  | 83548  | COG3      | component of oligomeric golgi complex 3                                                                  |
| Hs.507991.1.9  | chr4:145938596:145985287  | 145938613 | c | NM_022475    | 4  | CDS  | 64399  | HHIP      | hedgehog interacting protein                                                                             |

|                |                           |           |   |              |    |      |        |           |                                                                                                    |
|----------------|---------------------------|-----------|---|--------------|----|------|--------|-----------|----------------------------------------------------------------------------------------------------|
| Hs.508010.1.4  | chr13:48547502:48586791   | 48547563  | c | AK056071     | 3  | CDS  | 22862  | FNDC3A    | fibronectin type III domain containing 3A                                                          |
| Hs.508041.1.13 | chr13:49521720:49516906   | 49521326  | c | BC055417     | 4  | CDS  | 8847   | DLEU2     | deleted in lymphocytic leukemia, 2                                                                 |
| Hs.508148.1.29 | chr10:27105999:27100025   | 27105561  | c | NM_001012750 | 3  | CDS  | 10006  | ABI1      | abl-interactor 1                                                                                   |
| Hs.508616.1.7  | chr13:101319075:101177162 | 101319004 | c | NM_004115    | 3  | CDS  | 2259   | FGF14     | fibroblast growth factor 14                                                                        |
| Hs.508623.1.7  | chr13:102144719:102141316 | 102144225 | c | NM_001010977 | 1  | CDS  | 196541 | LOC196541 | OTTHUMP00000018663                                                                                 |
| Hs.508644.1.13 | chr13:106009780:106007481 | 106009309 | c | BC050434     | 2  | CDS  | 55082  | FLJ10154  | hypothetical protein FLJ10154                                                                      |
| Hs.508738.1.27 | chr13:110731026:110733486 | 110731416 | c | NM_003899    | 14 | CDS  | 8874   | ARHGEF7   | Rho guanine nucleotide exchange factor (GEF) 7                                                     |
| Hs.508999.1.14 | chr14:29169698:29168051   | 29169529  | c | NM_002742    | 10 | CDS  | 5587   | PRKD1     | protein kinase D1                                                                                  |
| Hs.509017.1.16 | chr1:3768986:3766466      | 3768986   | c | NM_014704    | 15 | CDS  | 9731   | GlyBP     | glycine-, glutamate-, thienylcyclohexylpiperidine-binding protein                                  |
| Hs.509017.1.22 | chr1:3773582:3770944      | 3773392   | c | NM_014704    | 12 | CDS  | 9731   | GlyBP     | glycine-, glutamate-, thienylcyclohexylpiperidine-binding protein                                  |
| Hs.509017.1.8  | chr1:3756000:3755239      | 3755870   | c | NM_014704    | 21 | CDS  | 9731   | GlyBP     | glycine-, glutamate-, thienylcyclohexylpiperidine-binding protein                                  |
| Hs.509083.1.15 | chr14:32312851:32360358   | 32312958  | c | NM_004274    | 12 | CDS  | 9472   | AKAP6     | A kinase (PRKA) anchor protein 6                                                                   |
| Hs.509140.1.15 | chr14:34297660:34293872   | 34297523  | c | NM_013448    | 25 | CDS  | 11177  | BAZ1A     | bromodomain adjacent to zinc finger domain, 1A                                                     |
| Hs.509140.1.45 | chr14:34319142:34315473   | 34319073  | c | NM_013448    | 17 | CDS  | 11177  | BAZ1A     | bromodomain adjacent to zinc finger domain, 1A                                                     |
| Hs.509163.1.11 | chr5:172274448:172283613  | 172277944 | c | BC012766     | 5  | CDS  | 57222  | KIAA1181  | endoplasmic reticulum-golgi intermediate compartment 32 kDa protein                                |
| Hs.509343.1.9  | chr14:52396040:52395019   | 52395774  | c | NM_006832    | 14 | CDS  | 10979  | PLEKHC1   | pleckstrin homology domain containing, family C (with FERM domain) member 1                        |
| Hs.509451.1.12 | chr14:57760328:57766869   | 57760388  | c | NM_018477    | 10 | CDS  | 55860  | ACTR10    | actin-related protein 10 homolog (S. cerevisiae)                                                   |
| Hs.509451.1.4  | chr14:57745579:57747762   | 57745654  | c | NM_018477    | 4  | CDS  | 55860  | ACTR10    | actin-related protein 10 homolog (S. cerevisiae)                                                   |
| Hs.509499.1.26 | chr14:59662295:59670440   | 59662608  | c | NM_022495    | 5  | CDS  | 64430  | C14orf135 | chromosome 14 open reading frame 135                                                               |
| Hs.509545.1.15 | chr6:32262996:32262657    | 32262731  | c | NM_002586    | 6  | CDS  | 5089   | PBX2      | pre-B-cell leukemia transcription factor 2                                                         |
| Hs.509622.1.9  | chr6:33368770:33368300    | 33368661  | c | NM_004761    | 16 | CDS  | 5863   | RGL2      | ral guanine nucleotide dissociation stimulator-like 2                                              |
| Hs.509699.1.11 | chr14:66816008:66828980   | 66816397  | c | NM_022474    | 3  | CDS  | 64398  | MPP5      | membrane protein, palmitoylated 5 (MAGUK p55 subfamily member 5)                                   |
| Hs.509780.1.36 | chr14:68655663:68654749   | 68655487  | c | NM_003861    | 3  | CDS  | 8816   | WDR22     | WD repeat domain 22                                                                                |
| Hs.510225.1.14 | chr14:90430509:90426776   | 90430071  | c | NM_004755    | 13 | CDS  | 9252   | RPS6KA5   | ribosomal protein S6 kinase, 90kDa, polypeptide 5                                                  |
| Hs.510334.1.6  | chr14:94124072:94126130   | 94124097  | c | NM_000624    | 3  | CDS  | 5104   | SERPINA5  | serine (or cysteine) proteinase inhibitor, clade A (alpha-1 antiproteinase, antitrypsin), member 5 |
| Hs.510368.1.8  | chr14:95204671:95205640   | 95205476  | c | NM_020550    | 2  | 3UTR | 27004  | TCL6      | T-cell leukemia/lymphoma 6                                                                         |
| Hs.510368.1.9  | chr14:95205708:95207420   | 95206502  | c | NM_014418    | 2  | 3UTR | 27004  | TCL6      | T-cell leukemia/lymphoma 6                                                                         |
| Hs.510402.1.12 | chr1:204328936:204329518  | 204329115 | c | NM_153826    | 6  | CDS  | 4179   | MCP       | membrane cofactor protein (CD46, trophoblast-lymphocyte cross-reactive antigen)                    |
| Hs.510407.1.31 | chr14:98949040:98946306   | 98947369  | c | NM_199123    | 8  | CDS  | 84193  | C14orf154 | chromosome 14 open reading frame 154                                                               |
| Hs.510533.1.25 | chr14:102479980:102476415 | 102479929 | c | NM_006035    | 30 | CDS  | 9578   | CDC42BPB  | CDC42 binding protein kinase beta (DMPK-like)                                                      |
| Hs.510745.1.9  | chr7:44393931:44392468    | 44392736  | c | NM_182547    | 4  | CDS  | 222068 | TMED4     | transmembrane emp24 protein transport domain containing 4                                          |
| Hs.510833.1.71 | chr15:27880140:27852853   | 27879991  | c | NM_003257    | 2  | CDS  | 7082   | TJP1      | tight junction protein 1 (zona occludens 1)                                                        |
| Hs.510938.1.21 | chr15:32243052:32234178   | 32242539  | c | NM_024713    | 2  | CDS  | 79768  | C15orf29  | chromosome 15 open reading frame 29                                                                |
| Hs.510938.1.23 | chr15:32289443:32243184   | 32288027  | c | NM_024713    | 1  | 5UTR | 79768  | C15orf29  | chromosome 15 open reading frame 29                                                                |
| Hs.511069.1.7  | chr15:38854520:38853927   | 38854383  | c | NM_018163    | 8  | CDS  | 55192  | DNAJC17   | DnaJ (Hsp40) homolog, subfamily C, member 17                                                       |
| Hs.511096.1.21 | chr15:39557006:39558037   | 39557068  | c | NM_015138    | 14 | CDS  | 23168  | RTF1      | Rtf1, Paf1/RNA polymerase II complex component, homolog (S. cerevisiae)                            |

|                |                           |           |   |              |    |      |        |          |                                                                    |
|----------------|---------------------------|-----------|---|--------------|----|------|--------|----------|--------------------------------------------------------------------|
| Hs.51143.1.55  | chr15:40529260:40528196   | 40529148  | c | NM_022473    | 2  | CDS  | 64397  | ZFP106   | zinc finger protein 106 homolog (mouse)                            |
| Hs.511251.1.9  | chr15:43753292:43755590   | 43753507  | c | NM_021199    | 5  | CDS  | 58472  | SQRDL    | sulfide quinone reductase-like (yeast)                             |
| Hs.511311.1.12 | chr15:48059105:48052280   | 48058902  | c | NM_024837    | 12 | CDS  | 79895  | ATP8B4   | ATPase, Class I, type 8B, member 4                                 |
| Hs.511311.1.6  | chr15:47976780:47958949   | 47976672  | c | NM_024837    | 23 | CDS  | 79895  | ATP8B4   | ATPase, Class I, type 8B, member 4                                 |
| Hs.511367.1.13 | chr15:49291808:49290546   | 49291767  | c | NM_000103    | 9  | CDS  | 1588   | CYP19A1  | cytochrome P450, family 19, subfamily A, polypeptide 1             |
| Hs.511367.1.17 | chr15:49294558:49292051   | 49294523  | c | NM_000103    | 8  | CDS  | 1588   | CYP19A1  | cytochrome P450, family 19, subfamily A, polypeptide 1             |
| Hs.511367.1.27 | chr15:49301837:49298145   | 49300868  | c | NM_000103    | 5  | CDS  | 1588   | CYP19A1  | cytochrome P450, family 19, subfamily A, polypeptide 1             |
| Hs.511386.1.23 | chr15:49542867:49538285   | 49542569  | c | NM_015263    | 33 | CDS  | 23312  | DMXL2    | Dmx-like 2                                                         |
| Hs.511476.1.13 | chr15:54474325:54491791   | 54477831  | c | NM_198524    | 9  | CDS  | 374618 | TEX9     | testis expressed sequence 9                                        |
| Hs.511476.1.17 | chr15:54507964:54525160   | 54508173  | c | NM_198524    | 12 | 3UTR | 374618 | TEX9     | testis expressed sequence 9                                        |
| Hs.511477.1.18 | chr15:54768530:54761968   | 54768279  | c | NM_001002843 | 8  | CDS  | 54816  | SUHW4    | suppressor of hairy wing homolog 4 (Drosophila)                    |
| Hs.511477.1.24 | chr15:54780422:54772706   | 54777247  | c | NM_001002843 | 5  | CDS  | 54816  | SUHW4    | suppressor of hairy wing homolog 4 (Drosophila)                    |
| Hs.511477.1.25 | chr15:54780422:54772706   | 54778850  | c | NM_001002843 | 5  | CDS  | 54816  | SUHW4    | suppressor of hairy wing homolog 4 (Drosophila)                    |
| Hs.511477.1.26 | chr15:54780422:54772706   | 54779311  | c | NM_001002843 | 5  | CDS  | 54816  | SUHW4    | suppressor of hairy wing homolog 4 (Drosophila)                    |
| Hs.511477.1.9  | chr15:54733687:54722488   | 54731978  | c | NM_001002843 | 18 | CDS  | 54816  | SUHW4    | suppressor of hairy wing homolog 4 (Drosophila)                    |
| Hs.511668.1.45 | chr15:59991330:59989797   | 59991267  | c | NM_017684    | 61 | CDS  | 54832  | VPS13C   | vacuolar protein sorting 13C (yeast)                               |
| Hs.511686.1.32 | chr15:60863143:60871892   | 60864090  | c | NM_015059    | 43 | CDS  | 83660  | TLN2     | talin 2                                                            |
| Hs.511790.1.2  | chr15:72687821:72698590   | 72688118  | c | NM_001292    | 1  | 5UTR | 1198   | CLK3     | CDC-like kinase 3                                                  |
| Hs.511847.1.6  | chr19:54594577:54601954   | 54594871  | c | NM_144688    | 7  | CDS  | 147872 | FLJ32658 | hypothetical protein FLJ32658                                      |
| Hs.511916.1.12 | chr1:147411190:147408409  | 147410576 | c | NM_004436    | 3  | CDS  | 2029   | ENSA     | endosulfine alpha                                                  |
| Hs.511916.1.23 | chr1:147413015:147411358  | 147412602 | c | NM_004436    | 2  | CDS  | 2029   | ENSA     | endosulfine alpha                                                  |
| Hs.511951.1.10 | chr12:121949537:121944859 | 121948878 | c | NM_019624    | 8  | CDS  | 23457  | ABCB9    | ATP-binding cassette, sub-family B (MDR/TAP), member 9             |
| Hs.511978.1.1  | chr15:41880678:41881007   | 41880678  | c | NM_016400    | 2  | CDS  | 25764  | HYPK     | Huntingtin interacting protein K                                   |
| Hs.512147.1.6  | chr7:44346269:44345057    | 44346066  | c | NM_013389    | 8  | CDS  | 29881  | NPC1L1   | NPC1 (Niemann-Pick disease, type C1, gene)-like 1                  |
| Hs.512461.1.24 | chr9:129970595:129976857  | 129971857 | c | NM_020960    | 17 | CDS  | 57720  | GPR107   | G protein-coupled receptor 107                                     |
| Hs.512466.1.5  | chr9:133290445:133295094  | 133290759 | c | AK131545     | 9  | 5UTR | 169436 | C9orf96  | chromosome 9 open reading frame 96                                 |
| Hs.512564.1.2  | chr9:137376599:137382790  | 137376791 | c | NM_014434    | 2  | CDS  | 27158  | NDOR1    | NADPH dependent diflavin oxidoreductase 1                          |
| Hs.512606.1.21 | chr2:238781896:238784501  | 238782116 | c | NM_016510    | 8  | CDS  | 51540  | SCLY     | selenocysteine lyase                                               |
| Hs.512606.1.22 | chr2:238781896:238784501  | 238782164 | c | NM_016510    | 8  | CDS  | 51540  | SCLY     | selenocysteine lyase                                               |
| Hs.512606.1.24 | chr2:238781896:238784501  | 238782703 | c | NM_016510    | 8  | CDS  | 51540  | SCLY     | selenocysteine lyase                                               |
| Hs.512606.1.29 | chr2:238785164:238787441  | 238785490 | c | NM_016510    | 10 | CDS  | 51540  | SCLY     | selenocysteine lyase                                               |
| Hs.512606.1.9  | chr2:238760119:238772349  | 238760477 | c | NM_016510    | 4  | CDS  | 51540  | SCLY     | selenocysteine lyase                                               |
| Hs.512627.1.16 | chr8:19725836:19726593    | 19725856  | c | NM_018142    | 7  | CDS  | 55174  | C8orf35  | chromosome 8 open reading frame 35                                 |
| Hs.512627.1.39 | chr8:19747589:19753439    | 19747705  | c | NM_018142    | 16 | CDS  | 55174  | C8orf35  | chromosome 8 open reading frame 35                                 |
| Hs.512660.1.5  | chr21:10080031:10071493   | 10078517  | c | NM_182481    | 3  | CDS  | 85318  | BAGE3    | B melanoma antigen family, member 3                                |
| Hs.512691.1.3  | chr14:58997442:58995476   | 58997235  | c | NM_022571    | 3  | 3UTR | 64582  | GPR135   | G protein-coupled receptor 135                                     |
| Hs.512715.1.4  | chr8:31053346:31057924    | 31053669  | c | NM_000553    | 8  | CDS  | 7486   | WRN      | Werner syndrome                                                    |
| Hs.512743.1.19 | chr4:101201374:101187232  | 101201347 | c | NM_024920    | 2  | CDS  | 79982  | DNAJB14  | DnaJ (Hsp40) homolog, subfamily B, member 14                       |
| Hs.512744.1.2  | chr2:71118129:71118445    | 71118233  | c | NM_024933    | 2  | CDS  | 79998  | FLJ12056 | hypothetical protein FLJ12056                                      |
| Hs.512797.1.13 | chr19:16126302:16129019   | 16126472  | c | NM_032855    | 7  | CDS  | 84941  | HS2D     | hematopoietic SH2 domain containing                                |
| Hs.512894.1.40 | chr15:48684354:48678786   | 48683436  | c | NM_017672    | 21 | CDS  | 54822  | TRPM7    | transient receptor potential cation channel, subfamily M, member 7 |
| Hs.512914.1.8  | chr13:40830610:40830945   | 40830852  | c | NM_024561    | 11 | CDS  | 79612  | NARG1L   | NMDA receptor regulated 1-like                                     |

|                |                          |           |   |           |    |      |        |           |                                                                                                |
|----------------|--------------------------|-----------|---|-----------|----|------|--------|-----------|------------------------------------------------------------------------------------------------|
| Hs.513008.1.10 | chr15:70424840:70423536  | 70424630  | c | NM_000520 | 13 | CDS  | 3073   | HEXA      | hexosaminidase A (alpha polypeptide)                                                           |
| Hs.513039.1.57 | chr15:73502040:73493706  | 73501754  | c | NM_015477 | 3  | CDS  | 25942  | SIN3A     | SIN3 homolog A, transcription regulator (yeast)                                                |
| Hs.513195.1.13 | chr15:97513875:97497196  | 97513091  | c | NM_022905 | 11 | CDS  | 64927  | HCC-8     | proto-oncogene 8                                                                               |
| Hs.513207.1.4  | chr15:99386961:99403708  | 99387271  | c | NM_024652 | 6  | CDS  | 79705  | LRRK1     | leucine-rich repeat kinase 1                                                                   |
| Hs.513285.1.1  | chr16:3022745:3024899    | 3022773   | c | AK128093  | 2  | 5UTR | 146439 | LOC146439 | hypothetical LOC146439                                                                         |
| Hs.513292.1.7  | chr16:3301950:3302677    | 3302366   | c | NM_153028 | 2  | 5UTR | 7627   | ZNF75A    | zinc finger protein 75a                                                                        |
| Hs.513343.1.2  | chr16:10387481:10430225  | 10389096  | c | BC033891  | 1  | 5UTR | 80063  | ATF7IP2   | activating transcription factor 7 interacting protein 2                                        |
| Hs.513439.1.22 | chr14:87499480:87486846  | 87499411  | c | NM_000153 | 11 | CDS  | 2581   | GALC      | galactosylceramidase (Krabbe disease)                                                          |
| Hs.513488.1.1  | chr16:29739333:29749336  | 29741308  | c | NM_005115 | 1  | 5UTR | 9961   | MVP       | major vault protein                                                                            |
| Hs.513498.1.23 | chr16:30288049:30284417  | 30287736  | c | NM_015527 | 1  | CDS  | 26000  | TBC1D10B  | TBC1 domain family, member 10B                                                                 |
| Hs.513726.1.11 | chr1:89444660:89444293   | 89444295  | c | NM_052942 | 6  | CDS  | 115362 | GBP5      | guanylate binding protein 5                                                                    |
| Hs.513779.1.24 | chr16:83471692:83480336  | 83471832  | c | NM_031476 | 13 | CDS  | 83716  | CRISPLD2  | cysteine-rich secretory protein LCCL domain containing 2                                       |
| Hs.513779.1.9  | chr16:83437012:83440491  | 83437257  | c | NM_031476 | 3  | CDS  | 83716  | CRISPLD2  | cysteine-rich secretory protein LCCL domain containing 2                                       |
| Hs.513902.1.20 | chr17:5380894:5378033    | 5380702   | c | NM_014922 | 8  | CDS  | 22861  | NALP1     | NACHT, leucine rich repeat and PYD (pyrin domain) containing 1                                 |
| Hs.513902.1.3  | chr17:5345780:5343995    | 5345447   | c | BC051787  | 16 | 3UTR | 22861  | NALP1     | NACHT, leucine rich repeat and PYD (pyrin domain) containing 1                                 |
| Hs.513954.1.19 | chr15:81617170:81611118  | 81617107  | c | NM_016073 | 4  | CDS  | 50810  | HDGFRP3   | hepatoma-derived growth factor, related protein 3                                              |
| Hs.513965.1.6  | chr17:15588492:15590116  | 15588818  | c | NM_178571 | 15 | 3UTR | 353149 | MGC51025  | hypothetical protein MGC51025                                                                  |
| Hs.513975.1.12 | chr17:17065575:17063249  | 17065210  | c | NM_144997 | 8  | CDS  | 201163 | FLCN      | folliculin                                                                                     |
| Hs.513975.1.13 | chr17:17065575:17063249  | 17065280  | c | NM_144997 | 8  | CDS  | 201163 | FLCN      | folliculin                                                                                     |
| Hs.513977.1.1  | chr17:17147857:17150581  | 17148200  | c | NM_020201 | 1  | CDS  | 56953  | NT5M      | 5',3'-nucleotidase, mitochondrial                                                              |
| Hs.514242.1.12 | chr17:40886503:40883913  | 40886087  | c | NM_014798 | 7  | CDS  | 9842   | PLEKHM1   | pleckstrin homology domain containing, family M (with RUN domain) member 1                     |
| Hs.514303.1.12 | chr17:44839119:44837566  | 44839114  | c | NM_002634 | 6  | CDS  | 5245   | PHB       | prohibitin                                                                                     |
| Hs.514412.1.42 | chr17:59817353:59804981  | 59815292  | c | NM_000442 | 2  | CDS  | 5175   | PECAM1    | platelet/endothelial cell adhesion molecule (CD31 antigen)                                     |
| Hs.514477.1.19 | chr17:71072184:71076151  | 71072397  | c | NM_004524 | 10 | CDS  | 3993   | LLGL2     | lethal giant larvae homolog 2 (Drosophila)                                                     |
| Hs.514560.1.9  | chr17:76586816:76587492  | 76587059  | c | NM_024591 | 7  | CDS  | 79643  | CHMP6     | chromatin modifying protein 6                                                                  |
| Hs.514662.1.4  | chr1:109092213:109085315 | 109091388 | c | AK095517  | 8  | CDS  | 254268 | C1orf62   | chromosome 1 open reading frame 62                                                             |
| Hs.514806.1.3  | chr18:31497765:31511552  | 31498479  | c | NM_020474 | 2  | CDS  | 2589   | GALNT1    | UDP-N-acetyl-alpha-D-galactosamine:polypeptide N-acetylgalactosaminyltransferase 1 (GalNAc-T1) |
| Hs.514846.1.17 | chr18:42661919:42655034  | 42661719  | c | NM_004671 | 11 | CDS  | 9063   | PIAS2     | protein inhibitor of activated STAT, 2                                                         |
| Hs.514846.1.24 | chr18:42670317:42663829  | 42670207  | c | NM_004671 | 9  | CDS  | 9063   | PIAS2     | protein inhibitor of activated STAT, 2                                                         |
| Hs.514913.1.10 | chr18:59716059:59719953  | 59716660  | c | NM_002575 | 5  | CDS  | 5055   | SERPINB2  | serine (or cysteine) proteinase inhibitor, clade B (ovalbumin), member 2                       |
| Hs.515046.1.8  | chr19:2688045:2684484    | 2685526   | c | NM_144564 | 2  | CDS  | 29985  | SLC39A3   | solute carrier family 39 (zinc transporter), member 3                                          |
| Hs.515081.1.36 | chr19:4645672:4641970    | 4645341   | c | NM_139159 | 13 | CDS  | 91039  | DPP9      | dipeptidylpeptidase 9                                                                          |
| Hs.515130.1.7  | chr1:115918932:115937026 | 115919432 | c | NM_138959 | 3  | CDS  | 81839  | VANGL1    | vang-like 1 (van gogh, Drosophila)                                                             |
| Hs.515214.1.1  | chr19:14571995:14581875  | 14572188  | c | NM_207390 | 11 | CDS  | 388512 | FLJ45910  | FLJ45910 protein                                                                               |
| Hs.515271.1.7  | chr19:18965456:18962959  | 18964895  | c | BC020586  | 11 | 3UTR | 10147  | SFRS14    | splicing factor, arginine/serine-rich 14                                                       |
| Hs.515474.1.14 | chr19:50980691:50979814  | 50980354  | c | NM_004943 | 3  | CDS  | 1762   | DMWD      | dystrophia myotonica-containing WD repeat motif                                                |
| Hs.515474.1.22 | chr19:50986002:50981970  | 50985782  | c | NM_004943 | 2  | CDS  | 1762   | DMWD      | dystrophia myotonica-containing WD repeat motif                                                |
| Hs.515607.1.41 | chr19:60315646:60306749  | 60314555  | c | NM_017607 | 3  | CDS  | 54776  | PPP1R12C  | protein phosphatase 1, regulatory (inhibitor) subunit 12C                                      |



|                |                          |           |   |           |    |      |        |           |                                                                                 |
|----------------|--------------------------|-----------|---|-----------|----|------|--------|-----------|---------------------------------------------------------------------------------|
| Hs.515837.1.12 | chr1:143518665:143517833 | 143518482 | c | NM_183372 | 12 | CDS  | 200030 | LOC200030 | hypothetical protein LOC200030                                                  |
| Hs.515840.1.42 | chr2:25416960:25410064   | 25415972  | c | NM_022552 | 4  | CDS  | 1788   | DNMT3A    | DNA (cytosine-5-)-methyltransferase 3 alpha                                     |
| Hs.515951.1.13 | chr2:219965:214921       | 219894    | c | BC008374  | 7  | CDS  | 26751  | SH3YL1    | SH3 domain containing, Ysc84-like 1 (S. cerevisiae)                             |
| Hs.515985.1.10 | chr2:48610158:48613472   | 48610240  | c | NM_152994 | 11 | CDS  | 129285 | LOC129285 | smooth muscle myosin heavy chain 11 isoform SM1-like                            |
| Hs.516075.1.35 | chr2:70355668:70355283   | 70355455  | c | NM_022037 | 7  | CDS  | 7072   | TIA1      | TIA1 cytotoxic granule-associated RNA binding protein                           |
| Hs.516075.1.41 | chr2:70363336:70355778   | 70363209  | c | NM_022037 | 6  | CDS  | 7072   | TIA1      | TIA1 cytotoxic granule-associated RNA binding protein                           |
| Hs.516114.1.10 | chr2:74598832:74599002   | 74598957  | c | NM_012477 | 3  | CDS  | 23559  | WBP1      | WW domain binding protein 1                                                     |
| Hs.516179.1.16 | chr2:88321855:88324331   | 88322238  | c | NM_018271 | 7  | CDS  | 55258  | FLJ10916  | hypothetical protein FLJ10916                                                   |
| Hs.516179.1.7  | chr2:88314183:88317563   | 88315922  | c | NM_018271 | 4  | CDS  | 55258  | FLJ10916  | hypothetical protein FLJ10916                                                   |
| Hs.516182.1.61 | chr2:55755930:55754294   | 55754942  | c | NM_020463 | 1  | CDS  | 57223  | KIAA1387  | KIAA1387 protein                                                                |
| Hs.516249.1.11 | chr2:102240283:102241090 | 102240348 | c | NM_000877 | 4  | CDS  | 3554   | IL1R1     | interleukin 1 receptor, type I                                                  |
| Hs.516278.1.19 | chr1:147730658:147732434 | 147730863 | c | D31891    | 9  | CDS  | 9869   | SETDB1    | SET domain, bifurcated 1                                                        |
| Hs.516278.1.53 | chr1:147749291:147749543 | 147749400 | c | D31891    | 20 | CDS  | 9869   | SETDB1    | SET domain, bifurcated 1                                                        |
| Hs.516341.1.31 | chr2:96691860:96690474   | 96691661  | c | NM_017991 | 17 | CDS  | 55683  | FLJ10081  | hypothetical protein FLJ10081                                                   |
| Hs.516390.1.7  | chr2:130843994:130844359 | 130844223 | c | NM_014369 | 8  | CDS  | 26469  | PTPN18    | protein tyrosine phosphatase, non-receptor type 18 (brain-derived)              |
| Hs.516490.1.2  | chr2:161861780:161885504 | 161862103 | c | NM_004180 | 2  | CDS  | 10010  | TANK      | TRAF family member-associated NFKB activator                                    |
| Hs.516490.1.8  | chr2:161886812:161905932 | 161886997 | c | NM_004180 | 4  | CDS  | 10010  | TANK      | TRAF family member-associated NFKB activator                                    |
| Hs.516539.1.5  | chr2:177906424:177906737 | 177906602 | c | NM_194247 | 4  | CDS  | 220988 | HNRPA3    | heterogeneous nuclear ribonucleoprotein A3                                      |
| Hs.516629.1.16 | chr2:203509929:203507773 | 203509834 | c | NM_138468 | 5  | CDS  | 130026 | ALS2CR15  | amyotrophic lateral sclerosis 2 (juvenile) chromosome region, candidate 15      |
| Hs.516632.1.21 | chr2:183422776:183430531 | 183422970 | c | AY358577  | 10 | CDS  | 54431  | DNAJC10   | DnaJ (Hsp40) homolog, subfamily C, member 10                                    |
| Hs.516646.1.18 | chr2:208267886:208287143 | 208268295 | c | NM_004379 | 7  | CDS  | 1385   | CREB1     | cAMP responsive element binding protein 1                                       |
| Hs.516651.1.1  | chr2:190367324:190379758 | 190367727 | c | AK126073  | 2  | CDS  | 150709 | FLJ25415  | hypothetical protein FLJ25415                                                   |
| Hs.516711.1.14 | chr2:220231842:220231353 | 220231692 | c | NM_024536 | 2  | CDS  | 79586  | CHPF      | chondroitin polymerizing factor                                                 |
| Hs.516769.1.2  | chr2:233353165:233362523 | 233353501 | c | NM_025202 | 2  | CDS  | 80303  | EFHD1     | EF-hand domain family, member D1                                                |
| Hs.516775.1.21 | chr1:152547863:152546429 | 152547648 | c | AB046826  | 1  | CDS  | 54856  | FLJ20203  | hypothetical protein FLJ20203                                                   |
| Hs.516790.1.52 | chr1:152752019:152749752 | 152751067 | c | NM_004723 | 2  | CDS  | 9181   | ARHGEF2   | rho/rac guanine nucleotide exchange factor (GEF) 2                              |
| Hs.516802.1.13 | chr2:241380320:241379334 | 241380030 | c | NM_004321 | 43 | CDS  | 547    | KIF1A     | kinesin family member 1A                                                        |
| Hs.516859.1.6  | chr20:3836926:3839223    | 3837272   | c | NM_024960 | 2  | CDS  | 80025  | PANK2     | pantothenate kinase 2 (Hallervorden-Spatz syndrome)                             |
| Hs.516866.1.12 | chr20:4798551:4796522    | 4798234   | c | NM_005116 | 12 | CDS  | 9962   | SLC23A2   | solute carrier family 23 (nucleobase transporters), member 2                    |
| Hs.516989.1.5  | chr20:31808790:31810182  | 31808951  | c | NM_032819 | 6  | CDS  | 84905  | ZNF341    | zinc finger protein 341                                                         |
| Hs.517033.1.19 | chr20:36199928:36194317  | 36199863  | c | NM_004613 | 10 | CDS  | 7052   | TGM2      | transglutaminase 2 (C polypeptide, protein-glutamine-gamma-glutamyltransferase) |
| Hs.517033.1.20 | chr20:36199928:36194317  | 36199924  | c | NM_004613 | 10 | CDS  | 7052   | TGM2      | transglutaminase 2 (C polypeptide, protein-glutamine-gamma-glutamyltransferase) |
| Hs.517034.1.2  | chr20:32934454:32964559  | 32934460  | c | NM_018677 | 2  | CDS  | 55902  | ACAS2     | acetyl-Coenzyme A synthetase 2 (ADP forming)                                    |
| Hs.517080.1.19 | chr20:44417847:44417288  | 44417781  | c | NM_015945 | 5  | CDS  | 51006  | SLC35C2   | solute carrier family 35, member C2                                             |
| Hs.517145.1.38 | chr1:8864776:8862383     | 8864756   | c | NM_001428 | 4  | CDS  | 2023   | ENO1      | enolase 1, (alpha)                                                              |
| Hs.517168.1.9  | chr1:156708312:156703401 | 156708257 | c | NM_003564 | 1  | 5UTR | 8407   | TAGLN2    | transgelin 2                                                                    |
| Hs.517240.1.8  | chr21:33721210:33726353  | 33721213  | c | NM_005534 | 4  | CDS  | 3460   | IFNGR2    | interferon gamma receptor 2 (interferon gamma transducer 1)                     |
| Hs.517262.1.39 | chr21:33861444:33863146  | 33861643  | c | NM_003103 | 8  | CDS  | 6651   | SON       | SON DNA binding protein                                                         |

|                |                          |           |   |              |    |      |        |           |                                                                                |
|----------------|--------------------------|-----------|---|--------------|----|------|--------|-----------|--------------------------------------------------------------------------------|
| Hs.517284.1.5  | chr21:39716771:39714640  | 39715863  | c | NM_152505    | 5  | CDS  | 150082 | C21orf13  | chromosome 21 open reading frame 13                                            |
| Hs.517366.1.2  | chr21:46435407:46433164  | 46433472  | c | NM_001001438 | 22 | 3UTR | 4047   | LSS       | lanosterol synthase (2,3-oxidosqualene-lanosterol cyclase)                     |
| Hs.517438.1.37 | chr22:28542877:28536617  | 28542663  | c | NM_032204    | 5  | CDS  | 84164  | ASCC2     | activating signal cointegrator 1 complex subunit 2                             |
| Hs.517478.1.44 | chr22:22812352:22816447  | 22812521  | c | NM_012295    | 24 | CDS  | 23523  | CABIN1    | calcineurin binding protein 1                                                  |
| Hs.517546.1.20 | chr22:29614543:29626377  | 29614736  | c | NM_030758    | 12 | CDS  | 23762  | OSBP2     | oxysterol binding protein 2                                                    |
| Hs.517546.1.21 | chr22:29614543:29626377  | 29615009  | c | NM_030758    | 12 | CDS  | 23762  | OSBP2     | oxysterol binding protein 2                                                    |
| Hs.517559.1.34 | chr22:30174719:30170901  | 30174600  | c | BC032941     | 9  | CDS  | 56478  | EIF4ENIF1 | eukaryotic translation initiation factor 4E nuclear import factor 1            |
| Hs.517786.1.5  | chr3:9965441:9964686     | 9965264   | c | NM_207351    | 3  | CDS  | 285368 | FLJ33674  | hypothetical protein FLJ33674                                                  |
| Hs.517820.1.12 | chr3:14672141:14675381   | 14672141  | c | NM_016474    | 3  | 5UTR | 51244  | C3orf19   | chromosome 3 open reading frame 19                                             |
| Hs.517830.1.11 | chr3:15658569:15660826   | 15658754  | c | NM_000060    | 3  | CDS  | 686    | BTD       | biotinidase                                                                    |
| Hs.517948.1.26 | chr3:47858232:47859599   | 47859178  | c | NM_014966    | 9  | CDS  | 22907  | DHX30     | DEAH (Asp-Glu-Ala-His) box polypeptide 30                                      |
| Hs.518000.1.27 | chr3:52829686:52829374   | 52829448  | c | NM_002218    | 13 | CDS  | 3700   | ITI4      | inter-alpha (globulin) inhibitor H4 (plasma Kallikrein-sensitive glycoprotein) |
| Hs.518200.1.12 | chr3:123737704:123730281 | 123733316 | c | NM_031458    | 10 | CDS  | 83666  | PARP9     | poly (ADP-ribose) polymerase family, member 9                                  |
| Hs.518247.1.4  | chr3:130172827:130170946 | 130172477 | c | AK125726     | 1  | 5UTR | 57501  | KIAA1257  | KIAA1257                                                                       |
| Hs.518247.1.5  | chr3:130172827:130170946 | 130172524 | c | AK125726     | 1  | 5UTR | 57501  | KIAA1257  | KIAA1257                                                                       |
| Hs.518355.1.26 | chr3:159882649:159885014 | 159882924 | c | NM_024996    | 14 | CDS  | 85476  | GFM1      | G elongation factor, mitochondrial 1                                           |
| Hs.518403.1.7  | chr3:198167001:198163867 | 198166765 | c | NM_025163    | 2  | CDS  | 80235  | SMP3      | SMP3 mannosyltransferase                                                       |
| Hs.518460.1.24 | chr3:185383359:185383971 | 185383788 | c | NM_004068    | 11 | CDS  | 1173   | AP2M1     | adaptor-related protein complex 2, mu 1 subunit                                |
| Hs.518618.1.11 | chr4:47523085:47521000   | 47522476  | c | NM_006587    | 8  | CDS  | 10699  | CORIN     | corin, serine protease                                                         |
| Hs.518618.1.15 | chr4:47649847:47629871   | 47649804  | c | NM_006587    | 2  | CDS  | 10699  | CORIN     | corin, serine protease                                                         |
| Hs.518618.1.4  | chr4:47486090:47484995   | 47485785  | c | NM_006587    | 15 | CDS  | 10699  | CORIN     | corin, serine protease                                                         |
| Hs.518662.1.16 | chr1:181532637:181524534 | 181532203 | c | NM_022083    | 6  | CDS  | 116496 | C1orf24   | chromosome 1 open reading frame 24                                             |
| Hs.518750.1.6  | chr4:48691392:48692891   | 48691457  | c | NM_017830    | 5  | CDS  | 54940  | OCIAD1    | OCIA domain containing 1                                                       |
| Hs.518760.1.18 | chr4:54135279:54149747   | 54135316  | c | NM_030917    | 13 | CDS  | 81608  | FIP1L1    | FIP1 like 1 (S. cerevisiae)                                                    |
| Hs.518892.1.7  | chr4:100487002:100485917 | 100486747 | c | NM_000672    | 6  | CDS  | 130    | ADH6      | alcohol dehydrogenase 6 (class V)                                              |
| Hs.51891.1.27  | chr10:69396445:69388900  | 69396378  | c | NM_022079    | 16 | CDS  | 26091  | HERC4     | hect domain and RLD 4                                                          |
| Hs.518921.1.1  | chr4:107206190:107215769 | 107206342 | c | NM_198278    | 3  | CDS  | 255743 | NPNT      | likely ortholog of mouse nephronectin                                          |
| Hs.519294.1.49 | chr5:127692286:127682593 | 127691892 | c | NM_001999    | 34 | CDS  | 2201   | FBN2      | fibrillin 2 (congenital contractural arachnodactyly)                           |
| Hs.519304.1.10 | chr5:52197409:52213461   | 52197520  | c | NM_181501    | 6  | CDS  | 3672   | ITGA1     | integrin, alpha 1                                                              |
| Hs.519337.1.3  | chr5:137504292:137503755 | 137504215 | c | NM_139199    | 26 | CDS  | 10902  | BRD8      | bromodomain containing 8                                                       |
| Hs.519346.1.17 | chr5:65380366:65382366   | 65380435  | c | NM_001006600 | 19 | CDS  | 55914  | ERBB2IP   | erb2 interacting protein                                                       |
| Hs.519574.1.19 | chr5:132188608:132188413 | 132188523 | c | NM_133456    | 2  | CDS  | 134549 | APXL2     | apical protein 2                                                               |
| Hs.519632.1.24 | chr5:140987643:140986035 | 140987305 | c | NM_003883    | 10 | CDS  | 8841   | HDAC3     | histone deacetylase 3                                                          |
| Hs.519702.1.14 | chr5:156663953:156667346 | 156664368 | c | NM_014376    | 8  | CDS  | 26999  | CYFIP2    | cytoplasmic FMR1 interacting protein 2                                         |
| Hs.519756.1.33 | chr5:171453020:171449972 | 171452236 | c | NM_005990    | 9  | CDS  | 6793   | STK10     | serine/threonine kinase 10                                                     |
| Hs.519866.1.6  | chr6:6594910:6599775     | 6595112   | c | NM_004271    | 4  | CDS  | 9450   | LY86      | lymphocyte antigen 86                                                          |
| Hs.519972.1.16 | chr6:29802761:29803712   | 29803052  | c | AK125274     | 7  | CDS  | 3134   | HLA-F     | major histocompatibility complex, class I, F                                   |
| Hs.520087.1.4  | chr6:34603244:34604396   | 34603469  | c | NM_020804    | 3  | CDS  | 29993  | PACSN1    | protein kinase C and casein kinase substrate in neurons 1                      |
| Hs.520106.1.6  | chr6:38959211:38959629   | 38959545  | c | NM_001371    | 53 | CDS  | 1769   | DNAH8     | dynein, axonemal, heavy polypeptide 8                                          |
| Hs.520136.1.47 | chr6:43125122:43124286   | 43124821  | c | NM_014780    | 7  | CDS  | 9820   | CUL7      | cullin 7                                                                       |
| Hs.520182.1.16 | chr6:52488762:52482344   | 52488365  | c | NM_012288    | 4  | CDS  | 9697   | TRAM2     | translocation associated membrane protein 2                                    |
| Hs.520205.1.14 | chr7:5839599:5837674     | 5839575   | c | NM_014413    | 14 | CDS  | 27102  | EIF2AK1   | eukaryotic translation initiation factor 2-alpha kinase 1                      |
| Hs.520210.1.14 | chr7:6287054:6282626     | 6286949   | c | NM_006854    | 2  | CDS  | 11014  | KDELR2    | KDEL (Lys-Asp-Glu-Leu) endoplasmic reticulum protein retention receptor 2      |
| Hs.520244.1.1  | chr7:21241651:21242146   | 21241758  | c | NM_003112    | 2  | CDS  | 6671   | SP4       | Sp4 transcription factor                                                       |

|                |                           |           |   |              |    |      |        |           |                                                                        |
|----------------|---------------------------|-----------|---|--------------|----|------|--------|-----------|------------------------------------------------------------------------|
| Hs.520287.1.34 | chr6:99965337:99963942    | 99964957  | c | NM_032870    | 3  | CDS  | 25957  | C6orf111  | chromosome 6 open reading frame 111                                    |
| Hs.520287.1.35 | chr6:99965337:99963942    | 99965172  | c | NM_032870    | 3  | CDS  | 25957  | C6orf111  | chromosome 6 open reading frame 111                                    |
| Hs.520321.1.4  | chr6:111605562:111634487  | 111605628 | c | NM_018593    | 3  | CDS  | 117247 | SLC16A10  | solute carrier family 16 (monocarboxylic acid transporters), member 10 |
| Hs.520459.1.32 | chr7:73575922:73587774    | 73576037  | c | NM_001518    | 10 | CDS  | 2969   | GTF2I     | general transcription factor II, i                                     |
| Hs.520459.1.76 | chr7:73617837:73618528    | 73618093  | c | NM_001518    | 32 | 3UTR | 2969   | GTF2I     | general transcription factor II, i                                     |
| Hs.520583.1.2  | chr6:168006549:168004733  | 168006056 | c | NM_014356    | 4  | 3UTR | 26238  | C6orf123  | chromosome 6 open reading frame 123                                    |
| Hs.520627.1.19 | chr7:2420103:2422918      | 2420430   | c | NM_152558    | 21 | CDS  | 23288  | IQCE      | IQ motif containing E                                                  |
| Hs.520708.1.14 | chr7:24515618:24512119    | 24515286  | c | NM_004403    | 9  | CDS  | 1687   | DFNA5     | deafness, autosomal dominant 5                                         |
| Hs.520715.1.12 | chr7:26309079:26309855    | 26309227  | c | AK056484     | 6  | 3UTR | 441204 | LOC441204 | LOC441204                                                              |
| Hs.520715.1.6  | chr7:26307124:26307878    | 26307204  | c | AK056484     | 4  | 3UTR | 441204 | LOC441204 | LOC441204                                                              |
| Hs.520794.1.9  | chr7:44021038:44023861    | 44021615  | c | NM_006555    | 5  | CDS  | 10652  | YKT6      | SNARE protein Ykt6                                                     |
| Hs.520814.1.16 | chr7:47109919:47106667    | 47109817  | c | NM_022748    | 24 | CDS  | 64759  | TNS3      | tensin 3                                                               |
| Hs.520814.1.31 | chr7:47241149:47237023    | 47240810  | c | NM_022748    | 9  | CDS  | 64759  | TNS3      | tensin 3                                                               |
| Hs.520819.1.9  | chr7:154531049:154531610  | 154531540 | c | NM_005542    | 3  | CDS  | 3638   | INSIG1    | insulin induced gene 1                                                 |
| Hs.521083.1.13 | chr7:99798010:99804532    | 99798641  | c | NM_006076    | 6  | CDS  | 3268   | HRBL      | HIV-1 Rev binding protein-like                                         |
| Hs.521086.1.7  | chr7:99855981:99857140    | 99856066  | c | NM_023948    | 3  | CDS  | 64598  | MOSPD3    | motile sperm domain containing 3                                       |
| Hs.521296.1.15 | chr7:149993785:149995236  | 149994139 | c | NM_001091    | 3  | CDS  | 26     | ABP1      | amiloride binding protein 1 (amine oxidase (copper-containing))        |
| Hs.521419.1.22 | chr8:17188308:17196866    | 17188487  | c | NM_152415    | 11 | CDS  | 137492 | FLJ32642  | hepatocellular carcinoma related protein 1                             |
| Hs.521487.1.16 | chr8:30059904:30051114    | 30059791  | c | NM_016127    | 1  | CDS  | 51669  | TMEM66    | transmembrane protein 66                                               |
| Hs.521693.1.33 | chr8:95954882:95955955    | 95955152  | c | NM_017864    | 22 | CDS  | 55656  | FLJ20530  | hypothetical protein FLJ20530                                          |
| Hs.521800.1.5  | chr8:124307920:124301719  | 124307618 | c | NM_032847    | 5  | CDS  | 84933  | FLJ14825  | hypothetical protein FLJ14825                                          |
| Hs.521989.1.6  | chr9:5453122:5455498      | 5453238   | c | NM_014143    | 4  | CDS  | 29126  | CD274     | CD274 antigen                                                          |
| Hs.522019.1.11 | chr9:18670515:18671809    | 18671481  | c | NM_052866    | 11 | CDS  | 92949  | ADAMTSL1  | ADAMTS-like 1                                                          |
| Hs.522019.1.12 | chr9:18674799:18696744    | 18674955  | c | NM_139238    | 13 | CDS  | 92949  | ADAMTSL1  | ADAMTS-like 1                                                          |
| Hs.522019.1.3  | chr9:18564265:18612240    | 18564525  | c | NM_052866    | 4  | CDS  | 92949  | ADAMTSL1  | ADAMTS-like 1                                                          |
| Hs.522114.1.17 | chr9:36194177:36201599    | 36194239  | c | NM_001833    | 4  | CDS  | 1211   | CLTA      | clathrin, light polypeptide (Lca)                                      |
| Hs.522147.1.2  | chr9:40502765:40497903    | 40500695  | c | BC031626     | 5  | CDS  | 26149  | ZNF658    | zinc finger protein 658                                                |
| Hs.522172.1.14 | chrX:148391301:148387795  | 148391026 | c | NM_032508    | 4  | CDS  | 84548  | FAM11A    | family with sequence similarity 11, member A                           |
| Hs.522172.1.16 | chrX:148391301:148387795  | 148391254 | c | NM_032508    | 4  | CDS  | 84548  | FAM11A    | family with sequence similarity 11, member A                           |
| Hs.522373.1.11 | chr9:121152678:121154170  | 121152915 | c | NM_000177    | 4  | CDS  | 2934   | GSN       | gelsolin (amyloidosis, Finnish type)                                   |
| Hs.522384.1.24 | chr1:16366583:16328561    | 16364125  | c | NM_018994    | 4  | CDS  | 54455  | FBXO42    | F-box protein 42                                                       |
| Hs.522418.1.34 | chr9:128381532:128382107  | 128381710 | c | NM_001003722 | 14 | CDS  | 2733   | GLE1L     | GLE1 RNA export mediator-like (yeast)                                  |
| Hs.522484.1.20 | chr9:135216297:135224539  | 135216733 | c | NM_014279    | 4  | CDS  | 10439  | OLFM1     | olfactomedin 1                                                         |
| Hs.522616.1.18 | chrX:44694851:44698074    | 44694851  | c | NM_021140    | 20 | CDS  | 7403   | UTX       | ubiquitously transcribed tetratricopeptide repeat, X chromosome        |
| Hs.522663.1.7  | chrX:54356764:54355869    | 54356345  | c | NM_004463    | 17 | CDS  | 2245   | FGD1      | FYVE, RhoGEF and PH domain containing 1 (faciogenital dysplasia)       |
| Hs.522672.1.8  | chrX:56904176:56893933    | 56900287  | c | NM_001010862 | 2  | CDS  | 169981 | SPIN3     | spindlin family, member 3                                              |
| Hs.522675.1.13 | chrX:64523602:64521367    | 64523334  | c | AK074087     | 10 | 3UTR | 81887  | LAS1L     | LAS1-like (S. cerevisiae)                                              |
| Hs.522805.1.20 | chrX:149616484:149615335  | 149615942 | c | NM_031462    | 8  | CDS  | 83692  | CD99L2    | CD99 antigen-like 2                                                    |
| Hs.522895.1.15 | chr10:44806524:44807358   | 44806768  | c | NM_032023    | 9  | CDS  | 83937  | RASSF4    | Ras association (RalGDS/AF-6) domain family 4                          |
| Hs.522988.1.13 | chr10:70691057:70695346   | 70691260  | c | NM_025130    | 16 | CDS  | 80201  | HKDC1     | hexokinase domain containing 1                                         |
| Hs.522988.1.14 | chr10:70691057:70695346   | 70691399  | c | NM_025130    | 16 | CDS  | 80201  | HKDC1     | hexokinase domain containing 1                                         |
| Hs.522988.1.8  | chr10:70678491:70680051   | 70678715  | c | NM_025130    | 10 | CDS  | 80201  | HKDC1     | hexokinase domain containing 1                                         |
| Hs.523145.1.13 | chr1:20725425:20724771    | 20725297  | c | NM_005216    | 8  | CDS  | 1650   | DDOST     | dolichyl-diphosphooligosaccharide-protein glycosyltransferase          |
| Hs.523230.1.24 | chr10:103334348:103333429 | 103334097 | c | NM_013274    | 5  | CDS  | 27343  | POLL      | polymerase (DNA directed), lambda                                      |
| Hs.523262.1.12 | chr1:54223385:54221220    | 54223180  | c | NM_004872    | 3  | CDS  | 9528   | TMEM59    | transmembrane protein 59                                               |
| Hs.523413.1.5  | chr1:24137686:24135956    | 24137443  | c | NM_152372    | 21 | CDS  | 127294 | MYOM3     | myomesin family, member 3                                              |
| Hs.523442.1.6  | chr1:24491437:24511967    | 24491914  | c | NM_020448    | 2  | CDS  | 57185  | NPAL3     | NIPA-like domain containing 3                                          |
| Hs.523446.1.27 | chr1:103139442:103124534  | 103139322 | c | NM_001854    | 41 | CDS  | 1301   | COL11A1   | collagen, type XI, alpha 1                                             |

|                |                           |           |   |           |    |      |        |          |                                                                                 |
|----------------|---------------------------|-----------|---|-----------|----|------|--------|----------|---------------------------------------------------------------------------------|
| Hs.523446.1.41 | chr1:103208692:103203910  | 103208478 | c | NM_001854 | 5  | CDS  | 1301   | COL11A1  | collagen, type XI, alpha 1                                                      |
| Hs.523446.1.42 | chr1:103208692:103203910  | 103208521 | c | NM_001854 | 5  | CDS  | 1301   | COL11A1  | collagen, type XI, alpha 1                                                      |
| Hs.523457.1.6  | chr11:6933590:6961935     | 6935644   | c | BC014538  | 5  | CDS  | 7762   | ZNF215   | zinc finger protein 215                                                         |
| Hs.523510.1.20 | chr11:18326043:18330003   | 18326368  | c | NM_005316 | 9  | CDS  | 2965   | GTF2H1   | general transcription factor IIH, polypeptide 1, 62kDa                          |
| Hs.523510.1.7  | chr11:18316398:18317686   | 18316446  | c | NM_005316 | 4  | CDS  | 2965   | GTF2H1   | general transcription factor IIH, polypeptide 1, 62kDa                          |
| Hs.523628.1.3  | chr1:152499993:152504380  | 152500234 | c | NM_004632 | 3  | CDS  | 7818   | DAP3     | death associated protein 3                                                      |
| Hs.523628.1.6  | chr1:152504483:152508245  | 152504595 | c | NM_004632 | 4  | CDS  | 7818   | DAP3     | death associated protein 3                                                      |
| Hs.523702.1.4  | chr11:59697076:59696303   | 59696550  | c | NM_152851 | 6  | 3UTR | 64231  | MS4A6A   | membrane-spanning 4-domains, subfamily A, member 6A                             |
| Hs.523852.1.1  | chr11:69165461:69166979   | 69165690  | c | NM_053056 | 1  | CDS  | 595    | CCND1    | cyclin D1 (PRAD1: parathyroid adenomatosis 1)                                   |
| Hs.523854.1.19 | chr11:69191843:69191537   | 69191563  | c | NM_153451 | 4  | CDS  | 220064 | ORAOV1   | oral cancer overexpressed 1                                                     |
| Hs.523854.1.24 | chr11:69195697:69191962   | 69195327  | c | NM_153451 | 3  | CDS  | 220064 | ORAOV1   | oral cancer overexpressed 1                                                     |
| Hs.523968.1.16 | chr1:220283444:220278752  | 220282995 | c | NM_005426 | 17 | CDS  | 7159   | TP53BP2  | tumor protein p53 binding protein, 2                                            |
| Hs.524121.1.12 | chr11:124261569:124260354 | 124261413 | c | NM_019055 | 16 | CDS  | 54538  | ROBO4    | roundabout homolog 4, magic roundabout (Drosophila)                             |
| Hs.524121.1.13 | chr11:124261569:124260354 | 124261489 | c | NM_019055 | 16 | CDS  | 54538  | ROBO4    | roundabout homolog 4, magic roundabout (Drosophila)                             |
| Hs.524165.1.2  | chr12:18872:18771         | 18841     | c | AY341951  | 2  | CDS  | NA     | NA       | NA                                                                              |
| Hs.524251.1.3  | chr12:10355482:10357325   | 10355549  | c | AF498040  | 4  | CDS  | 3824   | KLRD1    | killer cell lectin-like receptor subfamily D, member 1                          |
| Hs.524341.1.11 | chr12:38631325:38552031   | 38629559  | c | NM_052885 | 4  | CDS  | 114134 | SLC2A13  | solute carrier family 2 (facilitated glucose transporter), member 13            |
| Hs.524496.1.10 | chr1:36455904:36456417    | 36456041  | c | NM_024676 | 9  | 3UTR | 79729  | C1orf113 | chromosome 1 open reading frame 113                                             |
| Hs.524523.1.23 | chr12:56207278:56207556   | 56207521  | c | NM_052897 | 7  | CDS  | 114785 | MBD6     | methyl-CpG binding domain protein 6                                             |
| Hs.524599.1.19 | chr12:74729246:74728512   | 74728641  | c | NM_004537 | 14 | CDS  | 4673   | NAP1L1   | nucleosome assembly protein 1-like 1                                            |
| Hs.524617.1.8  | chr10:118433291:118431379 | 118432957 | c | AB007877  | 7  | CDS  | 259217 | HSPA12A  | heat shock 70kDa protein 12A                                                    |
| Hs.524750.1.50 | chr11:3690369:3684434     | 3689641   | c | NM_016320 | 20 | CDS  | 4928   | NUP98    | nucleoporin 98kDa                                                               |
| Hs.524760.1.17 | chr12:111818226:111819913 | 111818470 | c | NM_016816 | 5  | CDS  | 4938   | OAS1     | 2',5'-oligoadenylate synthetase 1, 40/46kDa                                     |
| Hs.524760.1.7  | chr12:111809350:111811575 | 111809542 | c | NM_002534 | 2  | CDS  | 4938   | OAS1     | 2',5'-oligoadenylate synthetase 1, 40/46kDa                                     |
| Hs.524809.1.38 | chr12:121370385:121364740 | 121370145 | c | NM_002956 | 5  | CDS  | 6249   | RSN      | restin (Reed-Steinberg cell-expressed intermediate filament-associated protein) |
| Hs.524815.1.20 | chr12:121866643:121867528 | 121866757 | c | NM_003959 | 18 | CDS  | 9026   | HIP1R    | huntingtin interacting protein-1-related                                        |
| Hs.524828.1.3  | chr12:122983448:122997469 | 122984796 | c | NM_152437 | 1  | 5UTR | 144348 | ZNF664   | zinc finger protein 664                                                         |
| Hs.524874.1.42 | chr12:131941610:131937786 | 131941221 | c | BC043157  | 2  | CDS  | 23141  | KIAA0692 | KIAA0692 protein                                                                |
| Hs.524936.1.8  | chr11:62348213:62331715   | 62347971  | c | BC002645  | 10 | CDS  | 6811   | STX5A    | syntaxin 5A                                                                     |
| Hs.525061.1.29 | chr13:60007369:60039659   | 60007561  | c | NM_030794 | 11 | CDS  | 81550  | TDRD3    | tudor domain containing 3                                                       |
| Hs.525063.1.7  | chr11:85022972:85024358   | 85023033  | c | NM_018480 | 4  | CDS  | 55863  | HT007    | uncharacterized hypothalamus protein HT007                                      |
| Hs.525088.1.15 | chr11:95756080:95746280   | 95754614  | c | NM_024725 | 5  | CDS  | 79780  | FLJ23518 | hypothetical protein FLJ23518                                                   |
| Hs.525135.1.30 | chr13:97861079:97862155   | 97861478  | c | NM_005766 | 15 | CDS  | 10160  | FARP1    | FERM, RhoGEF (ARHGEF) and pleckstrin domain protein 1 (chondrocyte-derived)     |
| Hs.525135.1.47 | chr13:97885962:97889058   | 97886356  | c | NM_005766 | 19 | CDS  | 10160  | FARP1    | FERM, RhoGEF (ARHGEF) and pleckstrin domain protein 1 (chondrocyte-derived)     |
| Hs.525163.1.13 | chr13:110334045:110330461 | 110333543 | c | NM_017664 | 5  | CDS  | 55608  | ANKRD10  | ankyrin repeat domain 10                                                        |
| Hs.525163.1.14 | chr13:110334045:110330461 | 110333720 | c | NM_017664 | 5  | CDS  | 55608  | ANKRD10  | ankyrin repeat domain 10                                                        |
| Hs.525163.1.16 | chr13:110334045:110330461 | 110333856 | c | NM_017664 | 5  | CDS  | 55608  | ANKRD10  | ankyrin repeat domain 10                                                        |
| Hs.525163.1.20 | chr13:110343375:110334142 | 110343054 | c | NM_017664 | 4  | CDS  | 55608  | ANKRD10  | ankyrin repeat domain 10                                                        |
| Hs.52526.1.1   | chr3:151623606:151657560  | 151623803 | c | NM_014779 | 2  | CDS  | 9819   | TSC2D2   | TSC22 domain family, member 2                                                   |
| Hs.525264.1.15 | chr12:7152122:7145960     | 7151480   | c | NM_016546 | 2  | CDS  | 51279  | C1RL     | complement component 1, r subcomponent-like                                     |
| Hs.525391.1.19 | chr1:53397953:53396617    | 53397780  | c | NM_017887 | 2  | CDS  | 54987  | C1orf123 | chromosome 1 open reading frame 123                                             |
| Hs.525392.1.59 | chr14:63658899:63661549   | 63658988  | c | NM_015180 | 70 | CDS  | 23224  | SYNE2    | spectrin repeat containing, nuclear envelope 2                                  |

|                |                           |           |   |              |    |      |        |           |                                                                                                                                       |
|----------------|---------------------------|-----------|---|--------------|----|------|--------|-----------|---------------------------------------------------------------------------------------------------------------------------------------|
| Hs.525764.1.13 | chr15:30715409:30715749   | 30715674  | c | NM_014783    | 11 | CDS  | 9824   | ARHGAP11A | Rho GTPase activating protein 11A                                                                                                     |
| Hs.526464.1.39 | chr15:72122534:72123614   | 72122732  | c | NM_033238    | 8  | CDS  | 5371   | PML       | promyelocytic leukemia                                                                                                                |
| Hs.526464.1.40 | chr15:72122534:72123614   | 72122770  | c | NM_033238    | 8  | CDS  | 5371   | PML       | promyelocytic leukemia                                                                                                                |
| Hs.526464.1.5  | chr15:72077871:72102221   | 72078109  | c | NM_002675    | 2  | CDS  | 5371   | PML       | promyelocytic leukemia                                                                                                                |
| Hs.526500.1.6  | chr16:20938446:20922031   | 20937974  | c | NM_017539    | 41 | CDS  | 55567  | DNAH3     | dynein, axonemal, heavy polypeptide 3                                                                                                 |
| Hs.526552.1.5  | chr17:11463824:11473458   | 11463976  | c | NM_001372    | 6  | CDS  | 1770   | DNAH9     | dynein, axonemal, heavy polypeptide 9                                                                                                 |
| Hs.526552.1.6  | chr17:11549228:11563375   | 11549535  | c | NM_001372    | 26 | CDS  | 1770   | DNAH9     | dynein, axonemal, heavy polypeptide 9                                                                                                 |
| Hs.526902.1.6  | chr5:98143693:98156688    | 98144790  | c | NM_001012761 | 4  | CDS  | 285704 | RGMB      | RGM domain family, member B                                                                                                           |
| Hs.527104.1.1  | chr4:81861517:82148325    | 81861591  | c | NM_152770    | 3  | CDS  | 255119 | MGC35043  | hypothetical protein MGC35043                                                                                                         |
| Hs.527348.1.63 | chr7:91373835:91374820    | 91374270  | c | NM_005751    | 44 | CDS  | 10142  | AKAP9     | A kinase (PRKA) anchor protein (yotiao) 9                                                                                             |
| Hs.527348.1.7  | chr7:91269766:91274812    | 91270017  | c | NM_005751    | 7  | CDS  | 10142  | AKAP9     | A kinase (PRKA) anchor protein (yotiao) 9                                                                                             |
| Hs.527748.1.12 | chr10:126195831:126291822 | 126195935 | c | NM_022126    | 6  | CDS  | 64077  | LHPP      | phospholysine phosphohistidine inorganic pyrophosphate phosphatase                                                                    |
| Hs.528006.1.18 | chr19:53823347:53823749   | 53823468  | c | NM_020126    | 6  | CDS  | 56848  | SPHK2     | sphingosine kinase 2                                                                                                                  |
| Hs.528050.1.29 | chr5:140042868:140039653  | 140042530 | c | NM_002109    | 3  | CDS  | 3035   | HARS      | histidyl-tRNA synthetase                                                                                                              |
| Hs.528084.1.7  | chr1:144346761:144345030  | 144346436 | c | NM_016361    | 8  | CDS  | 51205  | ACP6      | acid phosphatase 6, lysophosphatidic                                                                                                  |
| Hs.528222.1.1  | chr5:52892348:52935038    | 52892951  | c | NM_002495    | 1  | CDS  | 4724   | NDUFS4    | NADH dehydrogenase (ubiquinone) Fe-S protein 4, 18kDa (NADH-coenzyme Q reductase)                                                     |
| Hs.528300.1.32 | chr10:3181812:3180484     | 3181657   | c | NM_014889    | 16 | CDS  | 10531  | PITRM1    | pitrilysin metalloproteinase 1                                                                                                        |
| Hs.528300.1.36 | chr10:3183438:3181946     | 3183368   | c | NM_014889    | 15 | CDS  | 10531  | PITRM1    | pitrilysin metalloproteinase 1                                                                                                        |
| Hs.528304.1.13 | chr8:24264769:24265444    | 24264994  | c | NM_014265    | 20 | CDS  | 10863  | ADAM28    | a disintegrin and metalloproteinase domain 28                                                                                         |
| Hs.528305.1.38 | chr22:37215134:37214637   | 37214815  | c | NM_006386    | 8  | CDS  | 10521  | DDX17     | DEAD (Asp-Glu-Ala-Asp) box polypeptide 17                                                                                             |
| Hs.528385.1.7  | chr14:23529409:23543385   | 23529643  | c | AY943857     | 2  | CDS  | 317749 | DHRS4L2   | dehydrogenase/reductase (SDR family) member 4 like 2                                                                                  |
| Hs.528385.1.8  | chr14:23529409:23543385   | 23529739  | c | AY943857     | 2  | CDS  | 317749 | DHRS4L2   | dehydrogenase/reductase (SDR family) member 4 like 2                                                                                  |
| Hs.528543.1.3  | chr3:196924806:196928020  | 196925013 | c | NM_001013714 | 2  | 3UTR | 440993 | LOC440993 | hypothetical gene supported by AK128346                                                                                               |
| Hs.528653.1.9  | chr14:56811361:56816665   | 56811928  | c | NM_018229    | 2  | CDS  | 55745  | C14orf108 | chromosome 14 open reading frame 108                                                                                                  |
| Hs.528660.1.18 | chr3:109780817:109777884  | 109780701 | c | NM_020890    | 7  | CDS  | 57650  | KIAA1524  | KIAA1524                                                                                                                              |
| Hs.528673.1.16 | chr8:11209984:11211591    | 11210104  | c | NM_015458    | 7  | CDS  | 66036  | MTMR9     | myotubularin related protein 9                                                                                                        |
| Hs.528703.1.13 | chr12:108919854:108924570 | 108919987 | c | NM_033121    | 6  | CDS  | 88455  | ANKRD13   | ankyrin repeat domain 13                                                                                                              |
| Hs.528834.1.16 | chr16:55038038:55031160   | 55037917  | c | NM_007006    | 3  | CDS  | 11051  | NUDT21    | nudix (nucleoside diphosphate linked moiety X)-type motif 21                                                                          |
| Hs.529181.1.9  | chr2:30876424:30872975    | 30875891  | c | NM_144575    | 15 | CDS  | 92291  | CAPN13    | calpain 13                                                                                                                            |
| Hs.529276.1.24 | chr2:170242403:170239315  | 170242267 | c | NM_024622    | 5  | CDS  | 79675  | FLJ21901  | hypothetical protein FLJ21901                                                                                                         |
| Hs.529280.1.11 | chr12:109276590:109274859 | 109276007 | c | NM_016238    | 10 | CDS  | 51434  | ANAPC7    | anaphase promoting complex subunit 7                                                                                                  |
| Hs.529280.1.32 | chr12:109288263:109286995 | 109288068 | c | NM_016238    | 5  | CDS  | 51434  | ANAPC7    | anaphase promoting complex subunit 7                                                                                                  |
| Hs.529369.1.17 | chr4:7929411:7920452      | 7929237   | c | NM_021638    | 8  | CDS  | 60312  | AFAP      | actin filament associated protein                                                                                                     |
| Hs.529408.1.10 | chr21:41539861:41550954   | 41540053  | c | NM_138991    | 6  | CDS  | 25825  | BACE2     | beta-site APP-cleaving enzyme 2                                                                                                       |
| Hs.529420.1.20 | chr21:45046048:45032439   | 45044333  | c | NM_003343    | 1  | CDS  | 7327   | UBE2G2    | ubiquitin-conjugating enzyme E2G 2 (UBC7 homolog, yeast)                                                                              |
| Hs.529438.1.53 | chr22:19406615:19406240   | 19406411  | c | NM_002650    | 8  | CDS  | 5297   | PIK4CA    | phosphatidylinositol 4-kinase, catalytic, alpha polypeptide solute carrier family 6 (neurotransmitter transporter, taurine), member 6 |
| Hs.529488.1.12 | chr3:14464329:14474461    | 14464603  | c | NM_003043    | 5  | CDS  | 6533   | SLC6A6    | member 6                                                                                                                              |
| Hs.529509.1.24 | chr3:42650232:42651108    | 42650232  | c | NM_001012651 | 12 | 3UTR | 4820   | NKTR      | natural killer-tumor recognition sequence                                                                                             |
| Hs.529551.1.18 | chr3:102573541:102569546  | 102573387 | c | NM_020654    | 6  | CDS  | 57337  | SEN7      | SUMO1/sentrin specific protease 7                                                                                                     |
| Hs.529551.1.19 | chr3:102573541:102569546  | 102573445 | c | NM_020654    | 6  | CDS  | 57337  | SEN7      | SUMO1/sentrin specific protease 7                                                                                                     |
| Hs.529677.1.7  | chr4:74812568:74807484    | 74812303  | c | NM_177532    | 8  | CDS  | 166824 | RASSF6    | Ras association (RalGDS/AF-6) domain family 6                                                                                         |
| Hs.529782.1.35 | chr9:35058247:35058061    | 35058154  | c | NM_007126    | 2  | CDS  | 7415   | VCP       | valosin-containing protein                                                                                                            |
| Hs.529892.1.19 | chr5:179184833:179192637  | 179184934 | c | NM_003900    | 5  | CDS  | 8878   | SQSTM1    | sequestosome 1                                                                                                                        |
| Hs.529892.1.26 | chr5:179192853:179193192  | 179193019 | c | NM_003900    | 6  | CDS  | 8878   | SQSTM1    | sequestosome 1                                                                                                                        |

|                |                          |           |   |              |    |     |        |          |                                                                                                           |
|----------------|--------------------------|-----------|---|--------------|----|-----|--------|----------|-----------------------------------------------------------------------------------------------------------|
| Hs.529948.1.49 | chr6:90442541:90442020   | 90442365  | c | NM_014611    | 77 | CDS | 23195  | MDN1     | MDN1, midasin homolog (yeast)                                                                             |
| Hs.529959.1.14 | chr6:110171169:110171570 | 110171371 | c | NM_014845    | 9  | CDS | 9896   | KIAA0274 | KIAA0274                                                                                                  |
| Hs.529984.1.8  | chr6:159430554:159429670 | 159430353 | c | NM_054114    | 8  | CDS | 117289 | TAGAP    | T-cell activation GTPase activating protein                                                               |
| Hs.529989.1.14 | chr6:167322793:167318036 | 167321898 | c | NM_003730    | 6  | CDS | 8635   | RNASET2  | ribonuclease T2                                                                                           |
| Hs.530009.1.11 | chr7:16610494:16607884   | 16610235  | c | NM_006408    | 6  | CDS | 10551  | AGR2     | anterior gradient 2 homolog (Xenopus laevis)                                                              |
| Hs.530045.1.3  | chr7:63720182:63735978   | 63720882  | c | NM_006524    | 3  | CDS | 7697   | ZNF138   | zinc finger protein 138                                                                                   |
| Hs.530291.1.4  | chr10:81907376:81905649  | 81906699  | c | NM_001157    | 14 | CDS | 311    | ANXA11   | annexin A11                                                                                               |
| Hs.530331.1.13 | chrX:19130949:19132265   | 19131129  | c | NM_000284    | 5  | CDS | 5160   | PDHA1    | pyruvate dehydrogenase (lipoamide) alpha 1                                                                |
| Hs.530402.1.33 | chr1:50965692:50922469   | 50965642  | c | NM_131917    | 4  | CDS | 11124  | FAF1     | Fas (TNFRSF6) associated factor 1                                                                         |
| Hs.530712.1.15 | chr14:34647095:34646332  | 34646605  | c | NM_017917    | 5  | CDS | 55012  | C14orf10 | chromosome 14 open reading frame 10                                                                       |
| Hs.530712.1.19 | chr14:34649481:34648889  | 34649028  | c | NM_017917    | 3  | CDS | 55012  | C14orf10 | chromosome 14 open reading frame 10                                                                       |
| Hs.530733.1.7  | chr11:59312997:59314567  | 59313250  | c | NM_004177    | 4  | CDS | 6809   | STX3A    | syntaxin 3A                                                                                               |
| Hs.530735.1.9  | chr11:59913646:59916733  | 59913788  | c | NM_021201    | 5  | CDS | 58475  | MS4A7    | membrane-spanning 4-domains, subfamily A, member 7                                                        |
| Hs.530749.1.46 | chr11:69901950:69905841  | 69902106  | c | NM_003626    | 26 | CDS | 8500   | PPFIA1   | protein tyrosine phosphatase, receptor type, f polypeptide (PTPRF), interacting protein (liprin), alpha 1 |
| Hs.530930.1.16 | chr16:48322182:48230287  | 48321988  | c | NM_015069    | 4  | CDS | 23090  | ZNF423   | zinc finger protein 423                                                                                   |
| Hs.531081.1.7  | chr14:54676835:54679054  | 54676911  | c | NM_002306    | 3  | CDS | 3958   | LGALS3   | lectin, galactoside-binding, soluble, 3 (galectin 3)                                                      |
| Hs.531106.1.17 | chr14:72636212:72639652  | 72637640  | c | NM_021239    | 9  | CDS | 58517  | RBM25    | RNA binding motif protein 25                                                                              |
| Hs.531330.1.9  | chr2:113917671:113918770 | 113917830 | c | NM_018491    | 3  | CDS | 55871  | CBWD1    | COBW domain containing 1                                                                                  |
| Hs.531615.1.18 | chr15:63106221:63103186  | 63106139  | c | NM_139242    | 2  | CDS | 123263 | MTFMT    | mitochondrial methionyl-tRNA formyltransferase                                                            |
| Hs.531752.1.17 | chr19:5872211:5869650    | 5871913   | c | NM_003624    | 14 | CDS | 8498   | RANBP3   | RAN binding protein 3                                                                                     |
| Hs.531770.1.10 | chr19:44127448:44125232  | 44127305  | c | NM_024907    | 5  | CDS | 115290 | FBXO17   | F-box protein 17                                                                                          |
| Hs.531807.1.15 | chr2:68958103:68961122   | 68958525  | c | NM_001007231 | 9  | CDS | 9938   | ARHGAP25 | Rho GTPase activating protein 25                                                                          |
| Hs.531807.1.21 | chr2:68961656:68964769   | 68961961  | c | NM_001007231 | 10 | CDS | 9938   | ARHGAP25 | Rho GTPase activating protein 25                                                                          |
| Hs.531819.1.43 | chr2:86630057:86630819   | 86630514  | c | NM_018433    | 25 | CDS | 55818  | JMJD1A   | jumonji domain containing 1A                                                                              |
| Hs.531906.1.20 | chr22:22549611:22550512  | 22549693  | c | NM_030807    | 10 | CDS | 66035  | SLC2A11  | solute carrier family 2 (facilitated glucose transporter), member 11                                      |
| Hs.531906.1.9  | chr22:22543913:22544461  | 22544028  | c | NM_030807    | 6  | CDS | 66035  | SLC2A11  | solute carrier family 2 (facilitated glucose transporter), member 11                                      |
| Hs.531962.1.10 | chr3:139701649:139699651 | 139701473 | c | NM_024491    | 16 | CDS | 80321  | Cep70    | p10-binding protein                                                                                       |
| Hs.531962.1.27 | chr3:139738717:139734111 | 139738459 | c | NM_024491    | 7  | CDS | 80321  | Cep70    | p10-binding protein                                                                                       |
| Hs.531962.1.9  | chr3:139701649:139699651 | 139701424 | c | NM_024491    | 16 | CDS | 80321  | Cep70    | p10-binding protein                                                                                       |
| Hs.532091.1.19 | chr5:77420972:77370855   | 77420896  | c | NM_003664    | 22 | CDS | 8546   | AP3B1    | adaptor-related protein complex 3, beta 1 subunit                                                         |
| Hs.532161.1.19 | chr6:109588613:109590644 | 109588661 | c | NM_173830    | 10 | CDS | 285753 | C6orf182 | chromosome 6 open reading frame 182                                                                       |
| Hs.532253.1.7  | chr8:28360606:28342840   | 28360546  | c | NM_172366    | 7  | CDS | 157574 | FBXO16   | F-box protein 16                                                                                          |
| Hs.532277.1.12 | chr8:146083028:146079026 | 146082783 | c | NM_021061    | 5  | CDS | 58500  | ZNF250   | zinc finger protein 250                                                                                   |
| Hs.532316.1.17 | chr9:119055750:119050774 | 119055452 | c | NM_014618    | 6  | CDS | 1620   | DBC1     | deleted in bladder cancer 1                                                                               |
| Hs.532411.1.21 | chr1:232230762:232224001 | 232230683 | c | NM_000081    | 31 | CDS | 1130   | LYST     | lysosomal trafficking regulator                                                                           |
| Hs.532411.1.34 | chr1:232276540:232271429 | 232276411 | c | NM_000081    | 14 | CDS | 1130   | LYST     | lysosomal trafficking regulator                                                                           |
| Hs.532437.1.13 | chr10:49120209:49118542  | 49120095  | c | NM_152428    | 3  | CDS | 143162 | FRMPD2   | FERM and PDZ domain containing 2                                                                          |
| Hs.532891.1.20 | chr22:40261202:40253250  | 40260993  | c | NM_138338    | 3  | CDS | 171568 | POLR3H   | polymerase (RNA) III (DNA directed) polypeptide H (22.9kD)                                                |
| Hs.533019.1.9  | chr22:18448761:18449238  | 18448869  | c | NM_022720    | 2  | CDS | 54487  | DGCR8    | DiGeorge syndrome critical region gene 8                                                                  |
| Hs.533040.1.9  | chr5:176847674:176843798 | 176847504 | c | NM_005451    | 10 | CDS | 9260   | PDLIM7   | PDZ and LIM domain 7 (enigma)                                                                             |
| Hs.533291.1.24 | chr6:24531258:24531790   | 24531684  | c | NM_020662    | 10 | CDS | 57380  | MRS2L    | MRS2-like, magnesium homeostasis factor (S. cerevisiae)                                                   |
| Hs.533291.1.9  | chr6:24520603:24523239   | 24520865  | c | NM_020662    | 5  | CDS | 57380  | MRS2L    | MRS2-like, magnesium homeostasis factor (S. cerevisiae)                                                   |
| Hs.533323.1.8  | chr6:96141581:96151333   | 96141978  | c | NM_024641    | 2  | CDS | 79694  | MANEA    | mannosidase, endo-alpha                                                                                   |

|                |                           |           |   |              |    |      |        |           |                                                                                                                                                                                              |
|----------------|---------------------------|-----------|---|--------------|----|------|--------|-----------|----------------------------------------------------------------------------------------------------------------------------------------------------------------------------------------------|
| Hs.533339.1.9  | chr1:7798175:7803218      | 7798284   | c | NM_016831    | 9  | CDS  | 8863   | PER3      | period homolog 3 (Drosophila)                                                                                                                                                                |
| Hs.533444.1.16 | chr1:23882531:23880120    | 23882096  | c | NM_000191    | 6  | CDS  | 3155   | HMGCL     | 3-hydroxymethyl-3-methylglutaryl-Coenzyme A lyase (hydroxymethylglutaricaciduria)                                                                                                            |
| Hs.533468.1.18 | chr9:19050085:19049000    | 19049218  | c | NM_017645    | 15 | CDS  | 54801  | FAM29A    | family with sequence similarity 29, member A                                                                                                                                                 |
| Hs.533499.1.15 | chr9:122695784:122693270  | 122695627 | c | AL833177     | 19 | 3UTR | 54542  | MNAB      | membrane associated DNA binding protein                                                                                                                                                      |
| Hs.533499.1.44 | chr9:122732144:122725213  | 122732005 | c | NM_018835    | 1  | 5UTR | 54542  | MNAB      | membrane associated DNA binding protein                                                                                                                                                      |
| Hs.533514.1.17 | chrX:1588244:1584563      | 1587949   | c | NM_004192    | 9  | CDS  | 8623   | ASMTL     | acetylserotonin O-methyltransferase-like                                                                                                                                                     |
| Hs.533514.1.25 | chrX:1594988:1590842      | 1594622   | c | NM_004192    | 7  | CDS  | 8623   | ASMTL     | acetylserotonin O-methyltransferase-like                                                                                                                                                     |
| Hs.533549.1.10 | chr1:45009442:44992573    | 45009298  | c | NM_020365    | 11 | CDS  | 8891   | EIF2B3    | eukaryotic translation initiation factor 2B, subunit 3 gamma, 58kDa                                                                                                                          |
| Hs.533582.1.10 | chr1:100662029:100672394  | 100662311 | c | NM_003672    | 11 | CDS  | 8556   | CDC14A    | CDC14 cell division cycle 14 homolog A (S. cerevisiae)                                                                                                                                       |
| Hs.533582.1.5  | chr1:100620574:100640227  | 100620691 | c | BC038979     | 7  | CDS  | 8556   | CDC14A    | CDC14 cell division cycle 14 homolog A (S. cerevisiae)                                                                                                                                       |
| Hs.533670.1.2  | chr10:95508579:95527125   | 95508659  | c | NM_005097    | 2  | CDS  | 9211   | LGI1      | leucine-rich, glioma inactivated 1                                                                                                                                                           |
| Hs.533683.1.43 | chr10:123314005:123300964 | 123313830 | c | NM_000141    | 4  | CDS  | 2263   | FGFR2     | fibroblast growth factor receptor 2 (bacteria-expressed kinase, keratinocyte growth factor receptor, craniofacial dysostosis 1, Crouzon syndrome, Pfeiffer syndrome, Jackson-Weiss syndrome) |
| Hs.533701.1.17 | chr11:33050776:33059236   | 33050965  | c | AK021448     | 5  | CDS  | 55346  | FLJ11336  | hypothetical protein FLJ11336                                                                                                                                                                |
| Hs.533701.1.19 | chr11:33050776:33059236   | 33051454  | c | AK021448     | 5  | CDS  | 55346  | FLJ11336  | hypothetical protein FLJ11336                                                                                                                                                                |
| Hs.533712.1.11 | chr11:66164171:66167496   | 66165239  | c | NM_002896    | 2  | CDS  | 5936   | RBM4      | RNA binding motif protein 4                                                                                                                                                                  |
| Hs.533712.1.7  | chr11:66164171:66167496   | 66164289  | c | NM_002896    | 2  | CDS  | 5936   | RBM4      | RNA binding motif protein 4                                                                                                                                                                  |
| Hs.533717.1.4  | chr14:100265157:100268131 | 100265324 | c | NM_003836    | 3  | CDS  | 8788   | DLK1      | delta-like 1 homolog (Drosophila)                                                                                                                                                            |
| Hs.533723.1.30 | chr11:77313443:77311166   | 77313136  | c | NM_033547    | 12 | CDS  | 92105  | MGC16733  | hypothetical gene MGC16733 similar to CG12113                                                                                                                                                |
| Hs.533855.1.1  | chr13:114065705:114066413 | 114065847 | c | NM_023011    | 2  | CDS  | 65110  | UPF3A     | UPF3 regulator of nonsense transcripts homolog A (yeast)                                                                                                                                     |
| Hs.533898.1.27 | chr15:20423941:20424642   | 20424225  | c | NM_052903    | 22 | CDS  | 114791 | TUBGCP5   | tubulin, gamma complex associated protein 5                                                                                                                                                  |
| Hs.533934.1.47 | chr2:27175474:27175762    | 27175716  | c | NM_017727    | 18 | 3UTR | 54867  | FLJ20254  | hypothetical protein FLJ20254                                                                                                                                                                |
| Hs.533956.1.11 | chrX:152356062:152366282  | 152356262 | c | NM_021949    | 20 | CDS  | 492    | ATP2B3    | ATPase, Ca++ transporting, plasma membrane 3                                                                                                                                                 |
| Hs.533985.1.51 | chr17:71608946:71605695   | 71608694  | c | NM_001013839 | 4  | CDS  | 23265  | EXOC7     | exocyst complex component 7                                                                                                                                                                  |
| Hs.534074.1.18 | chr18:75328571:75347235   | 75328983  | c | NM_006162    | 8  | CDS  | 4772   | NFATC1    | nuclear factor of activated T-cells, cytoplasmic, calcineurin-dependent 1                                                                                                                    |
| Hs.534101.1.4  | chr2:171064130:171065089  | 171064783 | c | NM_138995    | 10 | CDS  | 140469 | MYO3B     | myosin IIIB                                                                                                                                                                                  |
| Hs.534261.1.14 | chr15:86809821:86809112   | 86809739  | c | NM_022163    | 2  | CDS  | 26589  | MRPL46    | mitochondrial ribosomal protein L46                                                                                                                                                          |
| Hs.534284.1.10 | chr1:89186650:89185557    | 89186638  | c | NM_018284    | 10 | CDS  | 2635   | GBP3      | guanylate binding protein 3                                                                                                                                                                  |
| Hs.534284.1.9  | chr1:89186650:89185557    | 89186548  | c | NM_018284    | 10 | CDS  | 2635   | GBP3      | guanylate binding protein 3                                                                                                                                                                  |
| Hs.534293.1.10 | chr14:94155559:94158430   | 94156061  | c | NM_001085    | 3  | CDS  | 12     | SERPINA3  | serine (or cysteine) proteinase inhibitor, clade A (alpha-1 antiproteinase, antitrypsin), member 3                                                                                           |
| Hs.534312.1.12 | chr9:129660352:129660566  | 129660170 | c | NM_000113    | 4  | CDS  | 1861   | TOR1A     | torsin family 1, member A (torsin A)                                                                                                                                                         |
| Hs.534312.1.17 | chr9:129664413:129660754  | 129663209 | c | NM_000113    | 2  | CDS  | 1861   | TOR1A     | torsin family 1, member A (torsin A)                                                                                                                                                         |
| Hs.534339.1.5  | chr12:55411631:55411323   | 55411631  | c | NM_000946    | 13 | 3UTR | 5557   | PRIM1     | primase, polypeptide 1, 49kDa                                                                                                                                                                |
| Hs.534352.1.9  | chr19:7611890:7612590     | 7612098   | c | NM_006949    | 6  | CDS  | 6813   | STXBP2    | syntaxin binding protein 2                                                                                                                                                                   |
| Hs.534364.1.22 | chr2:219121107:219122084  | 219121444 | c | NM_007127    | 9  | CDS  | 7429   | VIL1      | villin 1                                                                                                                                                                                     |
| Hs.534364.1.25 | chr2:219123180:219124753  | 219123365 | c | NM_007127    | 12 | CDS  | 7429   | VIL1      | villin 1                                                                                                                                                                                     |
| Hs.534393.1.4  | chr19:59802564:59803788   | 59802993  | c | NM_006863    | 8  | CDS  | 11024  | LILRA1    | leukocyte immunoglobulin-like receptor, subfamily A (with TM domain), member 1                                                                                                               |
| Hs.53454.1.14  | chr3:134810076:134802936  | 134809697 | c | NM_007027    | 27 | CDS  | 11073  | TOPBP1    | topoisomerase (DNA) II binding protein 1                                                                                                                                                     |
| Hs.53454.1.33  | chr3:134819754:134818869  | 134819677 | c | NM_007027    | 21 | CDS  | 11073  | TOPBP1    | topoisomerase (DNA) II binding protein 1                                                                                                                                                     |
| Hs.534937.1.8  | chr19:4485026:4482835     | 4483366   | c | NM_001013706 | 2  | CDS  | 440503 | LOC440503 | similar to RIKEN cDNA 2310076L09                                                                                                                                                             |

|                 |                           |           |   |              |    |      |        |              |                                                                     |
|-----------------|---------------------------|-----------|---|--------------|----|------|--------|--------------|---------------------------------------------------------------------|
| Hs.535557.1.5   | chr19:11876703:11885223   | 11876893  | c | NM_021915    | 4  | CDS  | 7620   | ZNF69        | zinc finger protein 69 (Cos5)                                       |
| Hs.535591.1.11  | chr2:97659924:97655550    | 97659495  | c | BC071771     | 3  | CDS  | 375251 | LOC375251    | similar to KIAA1641 protein                                         |
| Hs.535711.1.14  | chr3:42211438:42215672    | 42211644  | c | NM_014965    | 9  | CDS  | 22906  | OIP106       | OGT(O-Glc-NAc transferase)-interacting protein 106 KDa              |
| Hs.535760.1.18  | chr4:109349422:109343145  | 109349418 | c | NM_016269    | 9  | CDS  | 51176  | LEF1         | lymphoid enhancer-binding factor 1                                  |
| Hs.536490.1.7   | chr18:70761637:70904093   | 70762002  | c | AB051490     | 7  | CDS  | 55628  | ZNF407       | zinc finger protein 407                                             |
| Hs.537121.1.10  | chr10:4879492:4879679     | 4879537   | c | NM_031436    | 9  | 3UTR | 83592  | AKR1CL2      | aldo-keto reductase family 1, member C-like 2                       |
| Hs.537121.1.9   | chr10:4879423:4879679     | 4879473   | c | AF263242     | 9  | CDS  | 83592  | AKR1CL2      | aldo-keto reductase family 1, member C-like 2                       |
| Hs.537126.1.12  | chr11:125668161:125668772 | 125668341 | c | NM_052887    | 5  | CDS  | 114609 | TIRAP        | toll-interleukin 1 receptor (TIR) domain containing adaptor protein |
| Hs.537438.1.2   | chr18:51878332:51874889   | 51878057  | c | AK127645     | 4  | CDS  | NA     | NA           | NA                                                                  |
| Hs.541209.1.22  | chrX:2788710:2792453      | 2788845   | c | NM_003918    | 11 | CDS  | 8908   | GYG2         | glycogenin 2                                                        |
| Hs.545578.1.3   | chr5:69470709:69461860    | 69470445  | c | NM_207331    | 11 | 3UTR | 153561 | LOC153561    | hypothetical protein LOC153561                                      |
| Hs.5462.1.11    | chr4:72703723:72717699    | 72704071  | c | NM_003759    | 11 | CDS  | 8671   | SLC4A4       | solute carrier family 4, sodium bicarbonate cotransporter, member 4 |
| Hs.546244.1.23  | chr15:91293311:91297590   | 91293464  | c | NM_001271    | 13 | CDS  | 1106   | CHD2         | chromodomain helicase DNA binding protein 2                         |
| Hs.546268.1.60  | chr15:70031171:70018323   | 70031039  | c | NM_006901    | 15 | CDS  | 4649   | MYO9A        | myosin IXA                                                          |
| Hs.546268.1.62  | chr15:70039295:70031292   | 70037907  | c | NM_006901    | 14 | CDS  | 4649   | MYO9A        | myosin IXA                                                          |
| Hs.546309.1.109 | chr8:134195030:134198034  | 134195138 | c | NM_003235    | 44 | CDS  | 7038   | TG           | thyroglobulin                                                       |
| Hs.546334.1.17  | chr15:88238116:88233377   | 88237315  | c | NM_005829    | 1  | CDS  | 10239  | AP3S2        | adaptor-related protein complex 3, sigma 2 subunit                  |
| Hs.546346.1.16  | chr15:28990311:28993352   | 28991130  | c | NM_014967    | 4  | CDS  | 22909  | KIAA1018     | KIAA1018 protein                                                    |
| Hs.546358.1.7   | chr7:141084703:141083203  | 141084492 | c | NM_013252    | 6  | CDS  | 23601  | CLEC5A       | C-type lectin domain family 5, member A                             |
| Hs.546364.1.3   | chr6:136471646:136510181  | 136472162 | c | NM_018945    | 3  | CDS  | 27115  | PDE7B        | phosphodiesterase 7B                                                |
| Hs.546364.1.8   | chr6:136518590:136536627  | 136518922 | c | NM_018945    | 8  | CDS  | 27115  | PDE7B        | phosphodiesterase 7B                                                |
| Hs.546381.1.8   | chr17:71207547:71210154   | 71207934  | c | NM_013260    | 5  | CDS  | 29115  | HCNGP        | transcriptional regulator protein                                   |
| Hs.546403.1.4   | chr9:83686705:83681955    | 83685918  | c | NM_017576    | 17 | CDS  | 55582  | KIF27        | kinesin family member 27                                            |
| Hs.546403.1.7   | chr9:83724765:83715102    | 83724587  | c | NM_017576    | 11 | CDS  | 55582  | KIF27        | kinesin family member 27                                            |
| Hs.546412.1.9   | chr16:19500477:19510612   | 19500908  | c | NM_020314    | 7  | CDS  | 57020  | MGC16824     | esophageal cancer associated protein                                |
| Hs.546419.1.19  | chr4:44532921:44533661    | 44533087  | c | NM_021927    | 11 | CDS  | 60558  | FLJ13220     | hypothetical protein FLJ13220                                       |
| Hs.546421.1.11  | chr10:73076381:73104874   | 73076543  | c | NM_022124    | 14 | CDS  | 64072  | CDH23        | cadherin-like 23                                                    |
| Hs.546421.1.21  | chr10:73136813:73138860   | 73137273  | c | NM_022124    | 26 | CDS  | 64072  | CDH23        | cadherin-like 23                                                    |
| Hs.546441.1.25  | chr3:171371862:171349735  | 171371222 | c | AJ320486     | 4  | CDS  | 80012  | PHC3         | polyhomeotic like 3 (Drosophila)                                    |
| Hs.546441.1.4   | chr3:171302968:171297875  | 171302828 | c | AJ320486     | 14 | CDS  | 80012  | PHC3         | polyhomeotic like 3 (Drosophila)                                    |
| Hs.546441.1.7   | chr3:171317715:171314010  | 171317612 | c | NM_024947    | 10 | CDS  | 80012  | PHC3         | polyhomeotic like 3 (Drosophila)                                    |
| Hs.546468.1.6   | chr16:21719528:21718657   | 21719336  | c | NM_145237    | 3  | CDS  | 94431  | LOC94431     | similar to RNA polymerase I transcription factor RRN3               |
| Hs.546487.1.6   | chr15:41443404:41441432   | 41443245  | c | NM_152455    | 4  | CDS  | 146050 | ZNF690       | zinc finger protein 690                                             |
| Hs.546500.1.8   | chr2:97177719:97173810    | 97177195  | c | NM_199336    | 3  | CDS  | 151313 | DKFZp434N062 | hypothetical protein DKFZp434N062                                   |
| Hs.546502.1.5   | chr5:180409976:180412805  | 180410069 | c | NM_152547    | 4  | CDS  | 153579 | BTNL9        | butyrophilin-like 9                                                 |
| Hs.546502.1.9   | chr5:180415622:180417957  | 180416101 | c | NM_152547    | 9  | CDS  | 153579 | BTNL9        | butyrophilin-like 9                                                 |
| Hs.546510.1.9   | chr17:30610835:30612102   | 30610952  | c | NM_144975    | 2  | CDS  | 162394 | MGC19764     | hypothetical protein MGC19764                                       |
| Hs.546519.1.2   | chr9:68092180:68093275    | 68092330  | c | NM_201453    | 3  | CDS  | 445571 | CBWD3        | COBW domain containing 3                                            |
| Hs.546519.2.20  | chr9:67992861:67991767    | 67992712  | c | BC067803     | 3  | CDS  | NA     | NA           | NA                                                                  |
| Hs.546538.1.6   | chr9:123219509:123221795  | 123220586 | c | AK126775     | 8  | 3UTR | 286204 | CRB2         | crumbs homolog 2 (Drosophila)                                       |
| Hs.54673.1.11   | chr17:7404859:7405039     | 7404974   | c | NM_172088    | 6  | CDS  | 8741   | TNFSF13      | tumor necrosis factor (ligand) superfamily, member 13               |
| Hs.546961.1.2   | chr2:159361264:159348101  | 159360675 | c | AK126351     | 2  | 5UTR | NA     | NA           | NA                                                                  |
| Hs.54697.1.24   | chrX:62757204:62727613    | 62757185  | c | NM_015185    | 1  | CDS  | 23229  | ARHGGEF9     | Cdc42 guanine nucleotide exchange factor (GEF) 9                    |
| Hs.547177.1.15  | chr2:114070637:114071292  | 114070796 | c | NM_182905    | 3  | CDS  | 375260 | MGC52000     | CXYorf1-related protein                                             |
| Hs.54725.1.3    | chr21:33082884:33091118   | 33083188  | c | NM_001006116 | 3  | CDS  | 54067  | C21orf49     | chromosome 21 open reading frame 49                                 |
| Hs.54838.1.9    | chr18:17286177:17288324   | 17286392  | c | NM_024935    | 14 | CDS  | 80000  | KIAA1772     | KIAA1772                                                            |



|                |                           |           |   |           |    |      |        |          |                                                                                                |
|----------------|---------------------------|-----------|---|-----------|----|------|--------|----------|------------------------------------------------------------------------------------------------|
| Hs.549055.1.14 | chr6:168130726:168133403  | 168131400 | c | NM_005936 | 14 | CDS  | 4301   | MLLT4    | myeloid/lymphoid or mixed-lineage leukemia (trithorax homolog, Drosophila); translocated to, 4 |
| Hs.549055.1.23 | chr6:168142196:168144240  | 168142442 | c | NM_005936 | 20 | CDS  | 4301   | MLLT4    | myeloid/lymphoid or mixed-lineage leukemia (trithorax homolog, Drosophila); translocated to, 4 |
| Hs.549056.1.25 | chr1:120190136:120183878  | 120189778 | c | NM_024408 | 22 | CDS  | 4853   | NOTCH2   | Notch homolog 2 (Drosophila)                                                                   |
| Hs.549083.1.4  | chr8:17204033:17202105    | 17203534  | c | NM_004686 | 13 | CDS  | 9108   | MTMR7    | myotubularin related protein 7                                                                 |
| Hs.549084.1.12 | chr6:150096328:150093708  | 150096169 | c | NM_004690 | 4  | CDS  | 9113   | LATS1    | LATS, large tumor suppressor, homolog 1 (Drosophila)                                           |
| Hs.549084.1.13 | chr6:150096328:150093708  | 150096294 | c | NM_004690 | 4  | CDS  | 9113   | LATS1    | LATS, large tumor suppressor, homolog 1 (Drosophila)                                           |
| Hs.549092.1.7  | chr8:53201164:53193555    | 53200997  | c | NM_014682 | 23 | CDS  | 9705   | ST18     | suppression of tumorigenicity 18 (breast carcinoma) (zinc finger protein)                      |
| Hs.549094.1.8  | chr9:97929278:97926304    | 97928654  | c | NM_033219 | 6  | 3UTR | 9830   | TRIM14   | tripartite motif-containing 14                                                                 |
| Hs.549097.1.40 | chr7:86468796:86468997    | 86468859  | c | NM_021145 | 19 | CDS  | 9988   | DMTF1    | cyclin D binding myb-like transcription factor 1                                               |
| Hs.549121.1.25 | chr3:56642111:56637683    | 56642092  | c | NM_015224 | 11 | CDS  | 23272  | RAP140   | retinoblastoma-associated protein 140                                                          |
| Hs.549149.1.9  | chr10:68196027:68051549   | 68195919  | c | NM_013266 | 9  | CDS  | 29119  | CTNNA3   | catenin (cadherin-associated protein), alpha 3                                                 |
| Hs.549157.1.8  | chr9:128164981:128166975  | 128165411 | c | NM_016035 | 2  | CDS  | 51117  | COQ4     | coenzyme Q4 homolog (yeast)                                                                    |
| Hs.549163.1.1  | chr16:76691284:76699820   | 76691592  | c | NM_016373 | 1  | CDS  | 51741  | WWOX     | WW domain containing oxidoreductase                                                            |
| Hs.549166.1.13 | chr13:19122401:19131134   | 19122552  | c | NM_017520 | 5  | CDS  | 54737  | HSMPP8   | M-phase phosphoprotein, mpp8                                                                   |
| Hs.549171.1.1  | chr1:147834402:147835986  | 147834558 | c | NM_017860 | 1  | CDS  | 54964  | C1orf56  | chromosome 1 open reading frame 56                                                             |
| Hs.549173.1.15 | chr1:175586004:175586760  | 175586413 | c | NM_152663 | 12 | CDS  | 55103  | RALGPS2  | Ral GEF with PH domain and SH3 binding motif 2                                                 |
| Hs.549177.1.4  | chr10:69775464:69771052   | 69773753  | c | NM_017987 | 18 | 3UTR | 55680  | RUFY2    | RUN and FYVE domain containing 2                                                               |
| Hs.549177.1.7  | chr10:69775464:69771052   | 69775115  | c | NM_017987 | 18 | 3UTR | 55680  | RUFY2    | RUN and FYVE domain containing 2                                                               |
| Hs.549220.1.8  | chr10:20493503:20505933   | 20493730  | c | NM_032812 | 7  | CDS  | 84898  | PLXDC2   | plexin domain containing 2                                                                     |
| Hs.549235.1.28 | chr17:71720039:71681467   | 71719560  | c | NM_052916 | 2  | CDS  | 114804 | RNF157   | ring finger protein 157                                                                        |
| Hs.549238.1.12 | chr1:225784580:225770041  | 225783712 | c | BC060777  | 2  | CDS  | 126731 | C1orf96  | chromosome 1 open reading frame 96                                                             |
| Hs.549244.1.4  | chrX:102580442:102578599  | 102580256 | c | NM_080879 | 1  | 5UTR | 142684 | RAB40A   | RAB40A, member RAS oncogene family                                                             |
| Hs.549247.1.11 | chr15:40856520:40855214   | 40856408  | c | NM_173500 | 15 | CDS  | 146057 | TTBK2    | tau tubulin kinase 2                                                                           |
| Hs.549248.1.5  | chr16:22002691:22004029   | 22002938  | c | NM_173501 | 4  | 3UTR | 146174 | C16orf52 | chromosome 16 open reading frame 52                                                            |
| Hs.549269.1.17 | chr12:111071640:111070977 | 111071264 | c | AB014514  | 41 | CDS  | 196515 | FLJ30092 | AF-1 specific protein phosphatase                                                              |
| Hs.549269.1.50 | chr12:111127166:111120014 | 111126977 | c | AK054654  | 2  | CDS  | 196515 | FLJ30092 | AF-1 specific protein phosphatase                                                              |
| Hs.549281.1.13 | chr6:41146848:41145852    | 41146765  | c | NM_145063 | 3  | CDS  | 221443 | C6orf130 | chromosome 6 open reading frame 130                                                            |
| Hs.549281.1.16 | chr6:41147312:41146994    | 41147216  | c | NM_145063 | 2  | CDS  | 221443 | C6orf130 | chromosome 6 open reading frame 130                                                            |
| Hs.549285.1.12 | chr11:65997973:65999644   | 65998698  | c | NM_145065 | 7  | CDS  | 246330 | PELI3    | pellino 3 alpha                                                                                |
| Hs.549345.1.3  | chr10:127385959:127385760 | 127385798 | c | AK094354  | 4  | CDS  | 399821 | FLJ37035 | FLJ37035 protein                                                                               |
| Hs.549345.1.4  | chr10:127385959:127385760 | 127385861 | c | AK094354  | 4  | CDS  | 399821 | FLJ37035 | FLJ37035 protein                                                                               |
| Hs.54941.1.11  | chrX:18671978:18671431    | 18671883  | c | NM_000292 | 32 | CDS  | 5256   | PHKA2    | phosphorylase kinase, alpha 2 (liver)                                                          |
| Hs.55041.1.16  | chr6:43133780:43132162    | 43133656  | c | NM_015950 | 2  | CDS  | 51069  | MRPL2    | mitochondrial ribosomal protein L2                                                             |
| Hs.550478.1.50 | chr1:21907338:21906745    | 21907208  | c | NM_005529 | 76 | CDS  | 3339   | HSPG2    | heparan sulfate proteoglycan 2 (perlecan)                                                      |
| Hs.550488.1.20 | chr6:31237762:31238232    | 31237985  | c | BC033086  | 3  | CDS  | 6941   | TCF19    | transcription factor 19 (SC1)                                                                  |
| Hs.550499.1.16 | chr12:32766835:32775214   | 32766971  | c | AB209070  | 10 | CDS  | 10059  | DNM1L    | dynamain 1-like                                                                                |
| Hs.550502.1.3  | chr4:39287792:39289231    | 39288000  | c | NM_006859 | 4  | CDS  | 11019  | LIAS     | lipoic acid synthetase                                                                         |
| Hs.550507.1.4  | chr11:63643222:63643629   | 63643236  | c | NM_013280 | 2  | 3UTR | 23769  | FLRT1    | fibronectin leucine rich transmembrane protein 1                                               |
| Hs.550520.1.7  | chr10:126652958:126660267 | 126653108 | c | NM_017580 | 5  | CDS  | 54764  | ZRANB1   | zinc finger, RAN-binding domain containing 1                                                   |
| Hs.550529.1.7  | chr17:75786986:75790137   | 75787318  | c | NM_024110 | 13 | CDS  | 79092  | CARD14   | caspase recruitment domain family, member 14                                                   |
| Hs.550529.1.8  | chr17:75790815:75792215   | 75791025  | c | NM_024110 | 15 | CDS  | 79092  | CARD14   | caspase recruitment domain family, member 14                                                   |
| Hs.550535.1.17 | chr1:2351839:2351131      | 2351609   | c | NM_024848 | 3  | CDS  | 79906  | FLJ13941 | hypothetical protein FLJ13941                                                                  |
| Hs.550536.1.72 | chr15:42712994:42708879   | 42712960  | c | NM_025137 | 8  | CDS  | 80208  | FLJ21439 | hypothetical protein FLJ21439                                                                  |

|                 |                          |           |   |              |    |      |        |          |                                                                                                 |
|-----------------|--------------------------|-----------|---|--------------|----|------|--------|----------|-------------------------------------------------------------------------------------------------|
| Hs.550538.1.5   | chr17:5266874:5270014    | 5267014   | c | NM_032308    | 3  | CDS  | 84268  | RIP      | RPA interacting protein                                                                         |
| Hs.550540.1.20  | chr5:177582458:177582188 | 177582332 | c | NM_153373    | 7  | CDS  | 85007  | MGC15875 | hypothetical protein MGC15875                                                                   |
| Hs.550567.1.11  | chr7:99455320:99454269   | 99454307  | c | NM_178831    | 6  | 3UTR | 352954 | GATS     | opposite strand transcription unit to STAG3                                                     |
| Hs.551505.1.45  | chr1:65037808:65035484   | 65037346  | c | NM_002227    | 8  | CDS  | 3716   | JAK1     | Janus kinase 1 (a protein tyrosine kinase)                                                      |
| Hs.551508.1.115 | chr2:152372748:152370419 | 152371220 | c | NM_004543    | 24 | CDS  | 4703   | NEB      | nebulin                                                                                         |
| Hs.551527.1.13  | chr20:61007683:61007399  | 61007445  | c | BC000770     | 5  | CDS  | 11083  | DATF1    | death associated transcription factor 1                                                         |
| Hs.551527.1.6   | chr20:61007683:60998794  | 61006803  | c | NM_080797    | 6  | CDS  | 11083  | DATF1    | death associated transcription factor 1                                                         |
| Hs.551562.1.19  | chr4:175614969:175627362 | 175616207 | c | NM_030633    | 13 | 3UTR | 80817  | KIAA1712 | KIAA1712                                                                                        |
| Hs.551565.1.29  | chr16:46939703:46942992  | 46939884  | c | NM_031490    | 14 | CDS  | 83752  | LONP     | peroxisomal lon protease                                                                        |
| Hs.551584.1.3   | chr10:25313670:25313312  | 25313335  | c | NM_145010    | 5  | CDS  | 219670 | C10orf63 | chromosome 10 open reading frame 63                                                             |
| Hs.551584.1.9   | chr10:25344794:25328482  | 25344681  | c | NM_145010    | 1  | CDS  | 219670 | C10orf63 | chromosome 10 open reading frame 63                                                             |
| Hs.552571.1.15  | chr4:5933962:5938009     | 5934104   | c | NM_014556    | 21 | 3UTR | 2121   | EVC      | Ellis van Creveld syndrome                                                                      |
| Hs.552571.1.17  | chr4:5938054:5943415     | 5938088   | c | NM_014556    | 22 | 3UTR | 2121   | EVC      | Ellis van Creveld syndrome                                                                      |
| Hs.552580.1.6   | chr2:242067021:242070437 | 242067382 | c | NM_014808    | 5  | CDS  | 9855   | FARP2    | FERM, RhoGEF and pleckstrin domain protein 2                                                    |
| Hs.552601.1.9   | chr7:156255346:156256074 | 156255515 | c | NM_138400    | 6  | CDS  | 64434  | NOM1     | nucleolar protein with MIF4G domain 1                                                           |
| Hs.552608.1.1   | chr1:219274680:219277420 | 219275642 | c | NM_144695    | 1  | 5UTR | 148362 | C1orf58  | chromosome 1 open reading frame 58                                                              |
| Hs.552614.1.4   | chr6:31201596:31205324   | 31201666  | c | NM_014068    | 2  | 5UTR | 170679 | PSORS1C1 | psoriasis susceptibility 1 candidate 1                                                          |
| Hs.552618.1.1   | chr7:134131317:134135498 | 134131693 | c | NM_178563    | 3  | CDS  | 340351 | AGBL3    | ATP/GTP binding protein-like 3                                                                  |
| Hs.552621.1.5   | chr3:139505046:139503245 | 139504811 | c | AF196568     | 10 | CDS  | 347736 | TXNDC6   | thioredoxin domain containing 6                                                                 |
| Hs.552621.1.8   | chr3:139521017:139519760 | 139520751 | c | NM_178130    | 5  | CDS  | 347736 | TXNDC6   | thioredoxin domain containing 6                                                                 |
| Hs.552625.1.12  | chr2:238525067:238532481 | 238525080 | c | AK130316     | 5  | 3UTR | 375316 | FLJ40411 | FLJ40411 protein                                                                                |
| Hs.55279.1.9    | chr18:59311309:59317332  | 59311922  | c | NM_002639    | 5  | CDS  | 5268   | SERPINB5 | serine (or cysteine) proteinase inhibitor, clade B (ovalbumin), member 5                        |
| Hs.553501.1.29  | chr5:86708614:86709968   | 86708978  | c | NM_002890    | 17 | CDS  | 5921   | RASA1    | RAS p21 protein activator (GTPase activating protein) 1                                         |
| Hs.553512.1.19  | chr12:6957763:6957169    | 6957535   | c | BC065194     | 9  | CDS  | 10162  | C3F      | putative protein similar to nussy (Drosophila)                                                  |
| Hs.553528.1.10  | chr8:121552359:121569579 | 121555371 | c | NM_022045    | 11 | CDS  | 27085  | MTBP     | Mdm2, transformed 3T3 cell double minute 2, p53 binding protein (mouse) binding protein, 104kDa |
| Hs.553528.1.8   | chr8:121538092:121540635 | 121538182 | c | NM_022045    | 7  | CDS  | 27085  | MTBP     | Mdm2, transformed 3T3 cell double minute 2, p53 binding protein (mouse) binding protein, 104kDa |
| Hs.553547.1.24  | chr2:47952023:47949217   | 47951639  | c | NM_025133    | 18 | CDS  | 80204  | FBXO11   | F-box protein 11                                                                                |
| Hs.553547.1.25  | chr2:47952023:47949217   | 47951709  | c | NM_025133    | 18 | CDS  | 80204  | FBXO11   | F-box protein 11                                                                                |
| Hs.553611.1.13  | chr1:231954993:231948136 | 231954254 | c | NM_152490    | 7  | CDS  | 148789 | B3GALNT2 | UDP-GalNAc:betaGlcNAc beta 1,3-galactosaminyltransferase, polypeptide 2                         |
| Hs.55378.1.2    | chr5:55239997:55242116   | 55240729  | c | NM_139017    | 11 | CDS  | 133396 | IL31RA   | interleukin 31 receptor A                                                                       |
| Hs.554732.1.4   | chr14:22657630:22656872  | 22657118  | c | NM_001805    | 1  | CDS  | 1053   | CEBPE    | CCAAT/enhancer binding protein (C/EBP), epsilon                                                 |
| Hs.554733.1.3   | chr22:49307608:49306508  | 49307538  | c | NM_152253    | 8  | 3UTR | 1120   | CHKB     | choline kinase beta                                                                             |
| Hs.554736.1.21  | chr3:150376734:150374216 | 150376470 | c | NM_000096    | 18 | CDS  | 1356   | CP       | ceruloplasmin (ferroxidase)                                                                     |
| Hs.554736.1.34  | chr3:150383950:150382619 | 150383812 | c | NM_000096    | 13 | CDS  | 1356   | CP       | ceruloplasmin (ferroxidase)                                                                     |
| Hs.554736.1.44  | chr3:150388536:150387218 | 150388404 | c | NM_000096    | 10 | CDS  | 1356   | CP       | ceruloplasmin (ferroxidase)                                                                     |
| Hs.554742.1.48  | chr8:38404595:38402921   | 38404421  | c | NM_000604    | 5  | CDS  | 2260   | FGFR1    | fibroblast growth factor receptor 1 (fms-related tyrosine kinase 2, Pfeiffer syndrome)          |
| Hs.554766.1.50  | chr1:52017918:52015314   | 52017519  | c | NM_002525    | 2  | CDS  | 4898   | NRD1     | nardilysin (N-arginine dibasic convertase)                                                      |
| Hs.554767.1.25  | chr17:5235604:5233005    | 5235519   | c | NM_002532    | 10 | CDS  | 4927   | NUP88    | nucleoporin 88kDa                                                                               |
| Hs.554784.1.2   | chr5:140750033:140854557 | 140750448 | c | NM_003736    | 1  | CDS  | 8641   | PCDHGB4  | protocadherin gamma subfamily B, 4                                                              |
| Hs.554789.1.2   | chr18:3492490:3489393    | 3492143   | c | NM_001003809 | 9  | CDS  | 9229   | DLGAP1   | discs, large (Drosophila) homolog-associated protein 1                                          |
| Hs.554789.1.3   | chr18:3492490:3489393    | 3492216   | c | NM_001003809 | 9  | CDS  | 9229   | DLGAP1   | discs, large (Drosophila) homolog-associated protein 1                                          |

|                |                          |           |   |              |    |      |        |           |                                                                           |
|----------------|--------------------------|-----------|---|--------------|----|------|--------|-----------|---------------------------------------------------------------------------|
| Hs.554798.1.13 | chr22:37201970:37203000  | 37202140  | c | NM_006855    | 4  | CDS  | 11015  | KDELR3    | KDEL (Lys-Asp-Glu-Leu) endoplasmic reticulum protein retention receptor 3 |
| Hs.554802.1.13 | chr3:184500494:184497658 | 184500259 | c | NM_015078    | 11 | CDS  | 23101  | MCF2L2    | MCF.2 cell line derived transforming sequence-like 2                      |
| Hs.554802.1.4  | chr3:184393488:184380650 | 184393139 | c | NM_015078    | 27 | CDS  | 23101  | MCF2L2    | MCF.2 cell line derived transforming sequence-like 2                      |
| Hs.554802.1.5  | chr3:184424587:184423929 | 184424153 | c | NM_015078    | 19 | CDS  | 23101  | MCF2L2    | MCF.2 cell line derived transforming sequence-like 2                      |
| Hs.554802.1.6  | chr3:184428786:184424681 | 184428616 | c | NM_015078    | 18 | CDS  | 23101  | MCF2L2    | MCF.2 cell line derived transforming sequence-like 2                      |
| Hs.554814.1.19 | chr15:46233280:46231774  | 46231796  | c | NM_016132    | 10 | CDS  | 50804  | MYEF2     | myelin expression factor 2                                                |
| Hs.554822.1.1  | chr2:234382467:234384444 | 234382993 | c | NM_205862    | 1  | 5UTR | 54578  | UGT1A6    | UDP glucuronosyltransferase 1 family, polypeptide A6                      |
| Hs.554831.1.45 | chr2:128238631:128236964 | 128238274 | c | NM_001006623 | 6  | CDS  | 55339  | WDR33     | WD repeat domain 33                                                       |
| Hs.554847.1.1  | chr5:140717373:140854557 | 140717481 | c | NM_018917    | 1  | CDS  | 56111  | PCDHGA4   | protocadherin gamma subfamily A, 4                                        |
| Hs.554883.1.6  | chr10:14978983:14981543  | 14979336  | c | BC029360     | 3  | CDS  | 79723  | SUV39H2   | suppressor of variegation 3-9 homolog 2 (Drosophila)                      |
| Hs.554891.1.1  | chrY:4912008:4943307     | 4913503   | c | NM_032971    | 1  | 5UTR | 83259  | PCDH11Y   | protocadherin 11 Y-linked                                                 |
| Hs.554892.1.7  | chr1:227794053:227795090 | 227794065 | c | NM_032018    | 4  | CDS  | 83932  | C1orf124  | chromosome 1 open reading frame 124                                       |
| Hs.554892.1.8  | chr1:227794053:227795090 | 227794443 | c | NM_032018    | 4  | CDS  | 83932  | C1orf124  | chromosome 1 open reading frame 124                                       |
| Hs.554905.1.3  | chr16:70220899:70231793  | 70221078  | c | NM_001017967 | 2  | CDS  | 91862  | MARVELD3  | MARVEL domain containing 3                                                |
| Hs.554913.1.2  | chr3:197538924:197531413 | 197538730 | c | NM_138461    | 5  | 3UTR | 116211 | TM4SF19   | transmembrane 4 L six family member 19                                    |
| Hs.554913.1.5  | chr3:197538924:197531413 | 197538896 | c | NM_138461    | 5  | 3UTR | 116211 | TM4SF19   | transmembrane 4 L six family member 19                                    |
| Hs.554926.1.8  | chr1:194436372:194415862 | 194434796 | c | NM_144977    | 3  | CDS  | 163486 | FAM31B    | family with sequence similarity 31, member B                              |
| Hs.554933.1.5  | chr7:102089174:102067373 | 102089079 | c | NM_145032    | 17 | CDS  | 222235 | FBXL13    | F-box and leucine-rich repeat protein 13                                  |
| Hs.554955.1.2  | chr10:21475276:21455059  | 21475116  | c | NM_001010896 | 1  | CDS  | 387638 | C10orf113 | chromosome 10 open reading frame 113                                      |
| Hs.554988.3.12 | chr15:26702954:26707564  | 26703125  | c | BC047911     | 4  | CDS  | NA     | NA        | NA                                                                        |
| Hs.55682.1.6   | chr22:35237024:35233150  | 35236899  | c | NM_003753    | 12 | CDS  | 8664   | EIF3S7    | eukaryotic translation initiation factor 3, subunit 7 zeta, 66/67kDa      |
| Hs.56.1.7      | chrX:106690376:106691740 | 106690499 | c | NM_002764    | 3  | CDS  | 5631   | PRPS1     | phosphoribosyl pyrophosphate synthetase 1                                 |
| Hs.5741.1.9    | chr6:84685893:84687519   | 84685918  | c | NM_016230    | 7  | CDS  | 51167  | CYB5R4    | cytochrome b5 reductase 4                                                 |
| Hs.57718.1.4   | chr8:27376412:27375189   | 27376248  | c | NM_000742    | 6  | CDS  | 1135   | CHRNA2    | cholinergic receptor, nicotinic, alpha polypeptide 2 (neuronal)           |
| Hs.57988.1.24  | chr16:51117:50538        | 50859     | c | NM_022450    | 10 | CDS  | 64285  | RHBDF1    | rhomoid family 1 (Drosophila)                                             |
| Hs.58559.1.10  | chr10:63669412:63666029  | 63669192  | c | NM_145307    | 5  | CDS  | 219790 | PLEKHK1   | pleckstrin homology domain containing, family K member 1                  |
| Hs.58559.1.13  | chr10:63669412:63666029  | 63669368  | c | NM_145307    | 5  | CDS  | 219790 | PLEKHK1   | pleckstrin homology domain containing, family K member 1                  |
| Hs.58559.1.3   | chr10:63628047:63614153  | 63622963  | c | AK096671     | 8  | CDS  | 219790 | PLEKHK1   | pleckstrin homology domain containing, family K member 1                  |
| Hs.58559.1.8   | chr10:63669412:63666029  | 63667922  | c | NM_145307    | 5  | CDS  | 219790 | PLEKHK1   | pleckstrin homology domain containing, family K member 1                  |
| Hs.58668.1.10  | chr21:46535805:46540503  | 46536539  | c | NM_058181    | 3  | CDS  | 54059  | C21orf57  | chromosome 21 open reading frame 57                                       |
| Hs.58668.1.9   | chr21:46535805:46540503  | 46536279  | c | NM_058181    | 3  | CDS  | 54059  | C21orf57  | chromosome 21 open reading frame 57                                       |
| Hs.58831.1.23  | chr1:203475498:203474783 | 203475128 | c | NM_005449    | 2  | CDS  | 9214   | FAIM3     | Fas apoptotic inhibitory molecule 3                                       |
| Hs.58877.1.1   | chr1:182678771:182681766 | 182678934 | c | NM_031935    | 16 | CDS  | 83872  | HMCN1     | hemicentin 1                                                              |
| Hs.58877.1.4   | chr1:182694099:182695603 | 182694226 | c | NM_031935    | 23 | CDS  | 83872  | HMCN1     | hemicentin 1                                                              |
| Hs.58974.1.10  | chr4:123106905:123104754 | 123106487 | c | NM_176824    | 18 | CDS  | 55212  | BBS7      | Bardet-Biedl syndrome 7                                                   |
| Hs.58974.1.27  | chr4:123140263:123137939 | 123140252 | c | NM_018190    | 4  | CDS  | 55212  | BBS7      | Bardet-Biedl syndrome 7                                                   |
| Hs.59236.1.33  | chr19:37822101:37814241  | 37820039  | c | NM_032139    | 12 | CDS  | 84079  | ANKRD27   | ankyrin repeat domain 27 (VPS9 domain)                                    |
| Hs.59425.1.14  | chr1:6526788:6526406     | 6526555   | c | NM_024654    | 8  | CDS  | 79707  | FLJ23323  | hypothetical protein FLJ23323                                             |
| Hs.59504.1.5   | chr9:124813202:124794787 | 124813091 | c | NM_173690    | 18 | CDS  | 286205 | C9orf126  | chromosome 9 open reading frame 126                                       |
| Hs.59719.1.11  | chr14:59689409:59686659  | 59689195  | c | NM_016029    | 4  | CDS  | 51635  | DHRS7     | dehydrogenase/reductase (SDR family) member 7                             |

|                |                           |           |   |              |    |      |        |          |                                                            |
|----------------|---------------------------|-----------|---|--------------|----|------|--------|----------|------------------------------------------------------------|
| Hs.59804.1.10  | chr9:89173356:89177376    | 89174901  | c | NM_024077    | 5  | CDS  | 79048  | SECISBP2 | SECIS binding protein 2                                    |
| Hs.59804.1.16  | chr9:89184423:89185815    | 89184430  | c | NM_024077    | 9  | CDS  | 79048  | SECISBP2 | SECIS binding protein 2                                    |
| Hs.60377.1.9   | chr12:107688527:107685487 | 107688166 | c | NM_018984    | 14 | CDS  | 54434  | SSH1     | slingshot homolog 1 (Drosophila)                           |
| Hs.61184.1.6   | chrX:129271035:129271869  | 129271042 | c | NM_016024    | 4  | CDS  | 51634  | RBMX2    | RNA binding motif protein, X-linked 2                      |
| Hs.61271.1.10  | chr4:156647342:156640899  | 156646923 | c | NM_024826    | 5  | CDS  | 79884  | FLJ21159 | ASAP                                                       |
| Hs.61590.1.19  | chr2:159901380:159901709  | 159901519 | c | NM_033394    | 21 | CDS  | 85461  | TANC     | TPR domain, ankyrin-repeat and coiled-coil-containing      |
| Hs.62209.1.13  | chr22:30295933:30298921   | 30296196  | c | NM_001007467 | 10 | CDS  | 9814   | SFI1     | Sfi1 homolog, spindle assembly associated (yeast)          |
| Hs.62595.1.1   | chr9:132789033:132792309  | 132789249 | c | NM_018956    | 2  | CDS  | 11092  | C9orf9   | chromosome 9 open reading frame 9                          |
| Hs.62661.1.26  | chr1:89235695:89234839    | 89235243  | c | NM_002053    | 6  | CDS  | 2633   | GBP1     | guanylate binding protein 1, interferon-inducible, 67kDa   |
| Hs.62771.1.11  | chr16:88553065:88554839   | 88553274  | c | NM_207514    | 6  | CDS  | 54849  | FLJ20186 | hypothetical protein FLJ20186                              |
| Hs.62880.1.3   | chr22:48849135:48849542   | 48849261  | c | NM_018995    | 4  | CDS  | 54456  | MOV10L1  | Mov10l1, Moloney leukemia virus 10-like 1, homolog (mouse) |
| Hs.63335.1.15  | chr16:67958210:67952894   | 67957597  | c | NM_005652    | 7  | CDS  | 7014   | TERF2    | telomeric repeat binding factor 2                          |
| Hs.63335.1.16  | chr16:67958210:67952894   | 67957844  | c | NM_005652    | 7  | CDS  | 7014   | TERF2    | telomeric repeat binding factor 2                          |
| Hs.63795.1.21  | chr1:26287394:26287768    | 26287627  | c | AK024038     | 13 | CDS  | 64793  | CCDC21   | coiled-coil domain containing 21                           |
| Hs.65256.1.19  | chr19:40314129:40309762   | 40313828  | c | NM_139284    | 7  | CDS  | 163175 | LGI4     | leucine-rich repeat LGI family, member 4                   |
| Hs.65256.1.20  | chr19:40314129:40309762   | 40313944  | c | NM_139284    | 7  | CDS  | 163175 | LGI4     | leucine-rich repeat LGI family, member 4                   |
| Hs.656.1.24    | chr5:137689402:137682963  | 137689379 | c | NM_001790    | 6  | CDS  | 995    | CDC25C   | cell division cycle 25C                                    |
| Hs.65735.1.8   | chr16:30679105:30678547   | 30678859  | c | NM_001014979 | 3  | CDS  | 90835  | LOC90835 | hypothetical protein LOC90835                              |
| Hs.65758.1.102 | chr6:33769461:33770678    | 33770061  | c | NM_002224    | 56 | CDS  | 3710   | ITPR3    | inositol 1,4,5-triphosphate receptor, type 3               |
| Hs.66.1.15     | chr2:102418394:102422922  | 102418731 | c | NM_016232    | 8  | CDS  | 9173   | IL1RL1   | interleukin 1 receptor-like 1                              |
| Hs.66.1.16     | chr2:102418394:102422922  | 102418785 | c | NM_016232    | 8  | CDS  | 9173   | IL1RL1   | interleukin 1 receptor-like 1                              |
| Hs.66.1.18     | chr2:102418394:102422922  | 102419701 | c | NM_016232    | 8  | CDS  | 9173   | IL1RL1   | interleukin 1 receptor-like 1                              |
| Hs.6651.1.4    | chr1:168405183:168402882  | 168404747 | c | NM_201994    | 8  | 3UTR | 8674   | VAMP4    | vesicle-associated membrane protein 4                      |
| Hs.6734.1.12   | chr15:88247451:88246040   | 88247110  | c | NM_182616    | 5  | CDS  | 348110 | MGC61550 | hypothetical protein MGC61550                              |
| Hs.6764.1.14   | chrX:48421363:48422688    | 48421616  | c | NM_006044    | 8  | CDS  | 10013  | HDAC6    | histone deacetylase 6                                      |
| Hs.6764.1.7    | chrX:48420328:48421023    | 48420511  | c | NM_006044    | 6  | CDS  | 10013  | HDAC6    | histone deacetylase 6                                      |
| Hs.6834.1.14   | chr11:47701103:47698215   | 47701078  | c | NM_015308    | 15 | CDS  | 23360  | FNBP4    | formin binding protein 4                                   |
| Hs.6834.1.15   | chr11:47701103:47698215   | 47701103  | c | NM_015308    | 15 | CDS  | 23360  | FNBP4    | formin binding protein 4                                   |
| Hs.6834.1.41   | chr11:47722080:47714869   | 47722041  | c | NM_015308    | 8  | CDS  | 23360  | FNBP4    | formin binding protein 4                                   |
| Hs.69594.1.20  | chr15:75558719:75562366   | 75559001  | c | NM_018200    | 10 | 3UTR | 10363  | HMG20A   | high-mobility group 20A                                    |
| Hs.69771.1.35  | chr6:32025314:32025805    | 32025349  | c | NM_001710    | 10 | CDS  | 629    | BF       | B-factor, properdin                                        |
| Hs.70903.1.6   | chr20:9967296:9971769     | 9967620   | c | NM_022096    | 3  | CDS  | 63926  | ANKRD5   | ankyrin repeat domain 5                                    |
| Hs.7099.1.15   | chr4:505731:507247        | 506625    | c | NM_017733    | 8  | CDS  | 54872  | GPI7     | GPI7 protein                                               |
| Hs.7099.1.24   | chr4:511020:514224        | 511330    | c | NM_017733    | 10 | CDS  | 54872  | GPI7     | GPI7 protein                                               |
| Hs.71941.1.16  | chr19:41195762:41194207   | 41195409  | c | NM_032878    | 3  | CDS  | 84964  | MGC15677 | hypothetical protein MGC15677                              |
| Hs.72026.1.3   | chr16:2808972:2810956     | 2809258   | c | NM_006799    | 4  | CDS  | 10942  | PRSS21   | protease, serine, 21 (testisin)                            |
| Hs.7296.1.2    | chr17:54643954:54644483   | 54644187  | c | NM_018149    | 1  | CDS  | 55181  | FLJ10587 | hypothetical protein FLJ10587                              |
| Hs.73793.1.2   | chr6:43847028:43850055    | 43847139  | c | NM_003376    | 1  | CDS  | 7422   | VEGF     | vascular endothelial growth factor                         |
| Hs.73923.1.9   | chr10:118342044:118344231 | 118342690 | c | NM_006229    | 3  | CDS  | 5407   | PNLIPRP1 | pancreatic lipase-related protein 1                        |
| Hs.73962.1.13  | chr6:94176939:94124851    | 94176093  | c | NM_004440    | 3  | CDS  | 2045   | EPHA7    | EPH receptor A7                                            |
| Hs.75243.1.8   | chr6:33048683:33050216    | 33049180  | c | NM_005104    | 2  | CDS  | 6046   | BRD2     | bromodomain containing 2                                   |
| Hs.75249.1.11  | chr16:18717523:18716868   | 18717462  | c | NM_015161    | 2  | CDS  | 23204  | ARL6IP   | ADP-ribosylation factor-like 6 interacting protein         |
| Hs.75516.1.8   | chr19:10324109:10322839   | 10323733  | c | NM_003331    | 23 | CDS  | 7297   | TYK2     | tyrosine kinase 2                                          |
| Hs.75535.1.9   | chr12:109819627:109816315 | 109819353 | c | NM_000432    | 1  | CDS  | 4633   | MYL2     | myosin, light polypeptide 2, regulatory, cardiac, slow     |
| Hs.75573.1.17  | chr4:104395337:104393314  | 104395125 | c | Z15005       | 46 | CDS  | 1062   | CENPE    | centromere protein E, 312kDa                               |
| Hs.75667.1.24  | chrX:48811797:48810670    | 48811398  | c | NM_003179    | 2  | CDS  | 6855   | SYP      | synaptophysin                                              |
| Hs.75694.1.12  | chr15:72972715:72975545   | 72973180  | c | NM_002435    | 5  | CDS  | 4351   | MPI      | mannose phosphate isomerase                                |
| Hs.75694.1.16  | chr15:72975720:72976404   | 72976091  | c | NM_002435    | 6  | CDS  | 4351   | MPI      | mannose phosphate isomerase                                |

|               |                           |           |   |              |    |      |       |           |                                                                          |
|---------------|---------------------------|-----------|---|--------------|----|------|-------|-----------|--------------------------------------------------------------------------|
| Hs.75812.1.17 | chr14:23639263:23641801   | 23639611  | c | NM_004563    | 7  | CDS  | 5106  | PCK2      | phosphoenolpyruvate carboxykinase 2 (mitochondrial)                      |
| Hs.76253.1.17 | chr12:110356552:110354370 | 110356400 | c | NM_002973    | 23 | CDS  | 6311  | ATXN2     | ataxin 2                                                                 |
| Hs.76494.1.12 | chr1:200184943:200187490  | 200185054 | c | NM_002725    | 2  | CDS  | 5549  | PRELP     | proline/arginine-rich end leucine-rich repeat protein                    |
| Hs.7720.1.69  | chr14:101553595:101554540 | 101553705 | c | NM_001376    | 40 | CDS  | 1778  | DNCH1     | dynein, cytoplasmic, heavy polypeptide 1                                 |
| Hs.77498.1.10 | chr17:71820545:71819377   | 71820466  | c | NM_002766    | 10 | CDS  | 5635  | PRPSAP1   | phosphoribosyl pyrophosphate synthetase-associated protein 1             |
| Hs.77558.1.3  | chr6:79968752:79968163    | 79968330  | c | NM_138730    | 5  | CDS  | 9324  | HMGN3     | high mobility group nucleosomal binding domain 3                         |
| Hs.77719.1.32 | chr2:85697697:85697387    | 85697508  | c | NM_000821    | 3  | CDS  | 2677  | GGCX      | gamma-glutamyl carboxylase                                               |
| Hs.77770.1.13 | chr8:42142236:42144340    | 42142457  | c | BC056257     | 5  | CDS  | 10947 | AP3M2     | adaptor-related protein complex 3, mu 2 subunit                          |
| Hs.77770.1.14 | chr8:42142236:42144340    | 42142558  | c | BC056257     | 5  | CDS  | 10947 | AP3M2     | adaptor-related protein complex 3, mu 2 subunit                          |
| Hs.78061.1.6  | chr6:134254642:134255985  | 134254926 | c | NM_198392    | 2  | 3UTR | 6943  | TCF21     | transcription factor 21                                                  |
| Hs.78061.1.7  | chr6:134254642:134255985  | 134255088 | c | NM_198392    | 2  | 3UTR | 6943  | TCF21     | transcription factor 21                                                  |
| Hs.7884.1.10  | chr11:74558458:74561071   | 74558697  | c | NM_007256    | 6  | CDS  | 11309 | SLCO2B1   | solute carrier organic anion transporter family, member 2B1              |
| Hs.7886.1.23  | chr2:64243485:64239285    | 64243288  | c | NM_020651    | 2  | CDS  | 57162 | PEL1      | pellino homolog 1 (Drosophila)                                           |
| Hs.79015.1.11 | chr3:113551357:113563079  | 113551506 | c | NM_001004196 | 6  | CDS  | 4345  | CD200     | CD200 antigen                                                            |
| Hs.79081.1.12 | chr12:109622659:109621691 | 109622333 | c | NM_002710    | 6  | CDS  | 5501  | PPP1CC    | protein phosphatase 1, catalytic subunit, gamma isoform                  |
| Hs.79081.1.14 | chr12:109622659:109621691 | 109622433 | c | NM_002710    | 6  | CDS  | 5501  | PPP1CC    | protein phosphatase 1, catalytic subunit, gamma isoform                  |
| Hs.79101.1.7  | chr5:162800916:162801469  | 162801026 | c | NM_004060    | 3  | CDS  | 900   | CCNG1     | cyclin G1                                                                |
| Hs.79136.1.13 | chr18:31945019:31943707   | 31944961  | c | NM_012319    | 11 | CDS  | 25800 | SLC39A6   | solute carrier family 39 (zinc transporter), member 6                    |
| Hs.8004.1.13  | chr3:125596881:125600233  | 125597068 | c | NM_003947    | 12 | CDS  | 8997  | KALRN     | kalirin, RhoGEF kinase                                                   |
| Hs.80343.1.7  | chr16:56632104:56633021   | 56632272  | c | NM_002428    | 5  | CDS  | 4324  | MMP15     | matrix metalloproteinase 15 (membrane-inserted)                          |
| Hs.80741.1.35 | chr13:99965823:99977929   | 99969291  | c | NM_000282    | 22 | CDS  | 5095  | PCCA      | propionyl Coenzyme A carboxylase, alpha polypeptide                      |
| Hs.8118.1.10  | chr18:2718595:2719272     | 2718828   | c | AK126324     | 8  | 5UTR | 23347 | SMCHD1    | structural maintenance of chromosomes flexible hinge domain containing 1 |
| Hs.8118.1.3   | chr18:2696469:2697560     | 2696499   | c | AK126324     | 1  | 5UTR | 23347 | SMCHD1    | structural maintenance of chromosomes flexible hinge domain containing 1 |
| Hs.82201.1.14 | chr16:56755458:56749759   | 56755416  | c | NM_001896    | 11 | 3UTR | 1459  | CSNK2A2   | casein kinase 2, alpha prime polypeptide                                 |
| Hs.82407.1.9  | chr17:4584626:4584524     | 4584567   | c | NM_022059    | 5  | 3UTR | 58191 | CXCL16    | chemokine (C-X-C motif) ligand 16                                        |
| Hs.83147.1.7  | chr6:30622451:30622070    | 30622241  | c | NM_005275    | 11 | CDS  | 2794  | GNL1      | guanine nucleotide binding protein-like 1                                |
| Hs.83313.1.3  | chr7:39383467:39385115    | 39383553  | c | NM_020192    | 2  | CDS  | 57002 | C7orf36   | chromosome 7 open reading frame 36                                       |
| Hs.83734.1.9  | chr16:30953359:30953791   | 30953696  | c | NM_004604    | 4  | CDS  | 6810  | STX4A     | syntaxin 4A (placental)                                                  |
| Hs.8417.1.5   | chr17:3715950:3712327     | 3715200   | c | NM_032294    | 15 | CDS  | 84254 | CAMKK1    | calcium/calmodulin-dependent protein kinase kinase 1, alpha              |
| Hs.8517.1.13  | chr19:53670019:53673137   | 53670217  | c | NM_004228    | 8  | CDS  | 9266  | PSCD2     | pleckstrin homology, Sec7 and coiled-coil domains 2 (cytohesin-2)        |
| Hs.85603.1.27 | chr7:22791127:22790281    | 22791023  | c | NM_032581    | 4  | CDS  | 84668 | DRCTNNB1A | down-regulated by Ctnnb1, a                                              |
| Hs.8578.1.19  | chr12:46426909:46424119   | 46424503  | c | BC068477     | 15 | 3UTR | 10411 | RAPGEF3   | Rap guanine nucleotide exchange factor (GEF) 3                           |
| Hs.85863.1.4  | chr19:63266722:63269920   | 63266973  | c | NM_003436    | 4  | CDS  | 7694  | ZNF135    | zinc finger protein 135 (clone pHZ-17)                                   |
| Hs.86392.1.11 | chr7:150370347:150371141  | 150370865 | c | NM_019015    | 2  | CDS  | 54480 | CSG1c-A   | chondroitin sulfate glucuronyltransferase                                |
| Hs.87128.1.33 | chr9:5813895:5803036      | 5813774   | c | NM_024896    | 4  | CDS  | 79956 | KIAA1815  | KIAA1815                                                                 |
| Hs.8752.1.12  | chr12:54994901:54991466   | 54994549  | c | NM_014255    | 3  | CDS  | 10330 | TMEM4     | transmembrane protein 4                                                  |
| Hs.87889.1.19 | chr14:94631914:94630247   | 94631436  | c | NM_030621    | 24 | CDS  | 23405 | DICER1    | Dicer1, Dcr-1 homolog (Drosophila)                                       |

|               |                           |           |   |              |    |      |        |          |                                                                                                |
|---------------|---------------------------|-----------|---|--------------|----|------|--------|----------|------------------------------------------------------------------------------------------------|
| Hs.8878.1.16  | chr10:94371211:94378544   | 94371330  | c | NM_004523    | 10 | CDS  | 3832   | KIF11    | kinesin family member 11                                                                       |
| Hs.88977.1.13 | chr6:8035417:8025263      | 8035195   | c | NM_004280    | 3  | CDS  | 9521   | EEF1E1   | eukaryotic translation elongation factor 1 epsilon 1                                           |
| Hs.89029.1.7  | chr10:45433593:45432026   | 45433232  | c | NM_174890    | 9  | CDS  | 93550  | ANUBL1   | AN1, ubiquitin-like, homolog (Xenopus laevis)                                                  |
| Hs.89497.1.14 | chr5:126182734:126184500  | 126182825 | c | NM_005573    | 6  | CDS  | 4001   | LMNB1    | lamin B1                                                                                       |
| Hs.89626.1.7  | chr12:28007547:28002769   | 28006528  | c | NM_198965    | 4  | CDS  | 5744   | PTH1H    | parathyroid hormone-like hormone                                                               |
| Hs.89771.1.7  | chr2:27657113:27657786    | 27657289  | c | NM_001486    | 18 | CDS  | 2646   | GCKR     | glucokinase (hexokinase 4) regulator                                                           |
| Hs.89983.1.16 | chr3:188457153:188453806  | 188456796 | c | NM_001879    | 5  | CDS  | 5648   | MASP1    | mannan-binding lectin serine protease 1 (C4/C2 activating component of Ra-reactive factor)     |
| Hs.9003.1.31  | chr16:31418123:31415773   | 31417997  | c | NM_022744    | 5  | CDS  | 64755  | FLJ13868 | hypothetical protein FLJ13868                                                                  |
| Hs.90093.1.1  | chr5:132415949:132428570  | 132416560 | c | NM_002154    | 1  | CDS  | 3308   | HSPA4    | heat shock 70kDa protein 4                                                                     |
| Hs.90280.1.21 | chr2:216037171:216039322  | 216037469 | c | NM_004044    | 14 | CDS  | 471    | ATIC     | 5-aminoimidazole-4-carboxamide ribonucleotide formyltransferase/IMP cyclohydrolase             |
| Hs.90527.1.12 | chr12:81253206:81250842   | 81253184  | c | NM_014167    | 2  | CDS  | 29080  | HSPC128  | HSPC128 protein                                                                                |
| Hs.90572.1.25 | chr6:43208404:43217383    | 43209437  | c | NM_152881    | 7  | CDS  | 5754   | PTK7     | PTK7 protein tyrosine kinase 7                                                                 |
| Hs.90572.1.47 | chr6:43221149:43222333    | 43221532  | c | NM_002821    | 16 | CDS  | 5754   | PTK7     | PTK7 protein tyrosine kinase 7                                                                 |
| Hs.90572.1.6  | chr6:43204981:43205442    | 43205164  | c | NM_002821    | 2  | CDS  | 5754   | PTK7     | PTK7 protein tyrosine kinase 7                                                                 |
| Hs.90753.1.5  | chr11:20345404:20354701   | 20345777  | c | NM_006410    | 3  | CDS  | 10553  | HTATIP2  | HIV-1 Tat interactive protein 2, 30kDa                                                         |
| Hs.91085.1.9  | chr3:57591187:57589653    | 57591116  | c | NM_152678    | 18 | CDS  | 201627 | FLJ34969 | hypothetical protein FLJ34969                                                                  |
| Hs.91531.1.31 | chr17:34130527:34131656   | 34130935  | c | NM_005937    | 16 | CDS  | 4302   | MLLT6    | myeloid/lymphoid or mixed-lineage leukemia (trithorax homolog, Drosophila); translocated to, 6 |
| Hs.91608.1.5  | chr2:26607037:26605670    | 26606851  | c | NM_004802    | 13 | CDS  | 9381   | OTOF     | otoferlin                                                                                      |
| Hs.91816.1.4  | chr11:113775920:113767598 | 113775011 | c | BC071695     | 1  | CDS  | 54494  | FLJ20010 | hypothetical protein FLJ20010                                                                  |
| Hs.9196.1.6   | chr9:97751796:97746830    | 97751421  | c | NM_016481    | 4  | CDS  | 51531  | C9orf156 | chromosome 9 open reading frame 156                                                            |
| Hs.92858.1.4  | chr6:42238812:42249048    | 42239131  | c | NM_000409    | 2  | 5UTR | 2978   | GUCA1A   | guanylate cyclase activator 1A (retina)                                                        |
| Hs.93485.1.6  | chr2:165992613:165994041  | 165992762 | c | NM_021007    | 7  | CDS  | 6326   | SCN2A2   | sodium channel, voltage-gated, type II, alpha 2                                                |
| Hs.93534.1.17 | chr6:147702214:147716151  | 147703525 | c | AK090549     | 11 | CDS  | 134957 | STXBP5   | syntaxin binding protein 5 (tomosyn)                                                           |
| Hs.93534.1.3  | chr6:147568898:147598078  | 147569330 | c | NM_139244    | 3  | CDS  | 134957 | STXBP5   | syntaxin binding protein 5 (tomosyn)                                                           |
| Hs.936.1.7    | chr5:176756682:176757389  | 176756912 | c | NM_003052    | 12 | CDS  | 6569   | SLC34A1  | solute carrier family 34 (sodium phosphate), member 1                                          |
| Hs.93667.1.2  | chr10:105872835:105873461 | 105873306 | c | NM_001002759 | 2  | CDS  | 119392 | C10orf78 | chromosome 10 open reading frame 78                                                            |
| Hs.93842.1.10 | chr5:110864598:110863704  | 110863744 | c | NM_139164    | 5  | CDS  | 134429 | STARD4   | START domain containing 4, sterol regulated                                                    |
| Hs.94070.1.11 | chr9:92266038:92259412    | 92266038  | c | NM_005014    | 1  | 5UTR | 4958   | OMD      | osteomodulin                                                                                   |
| Hs.94229.1.48 | chr19:14134417:14133439   | 14134274  | c | NM_001008701 | 6  | CDS  | 22859  | LPHN1    | latrophilin 1                                                                                  |
| Hs.9527.1.3   | chr2:27347818:27349839    | 27347952  | c | NM_016085    | 2  | CDS  | 51374  | C2orf28  | chromosome 2 open reading frame 28                                                             |
| Hs.95612.1.15 | chr18:26902857:26902309   | 26902558  | c | NM_004949    | 15 | CDS  | 1824   | DSC2     | desmocollin 2                                                                                  |
| Hs.96094.1.3  | chr8:42706850:42710783    | 42706951  | c | NM_000749    | 5  | CDS  | 1142   | CHRNB3   | cholinergic receptor, nicotinic, beta polypeptide 3                                            |
| Hs.96247.1.8  | chr1:227985093:228003608  | 227985330 | c | NM_005999    | 4  | CDS  | 7257   | TSNAX    | translin-associated factor X                                                                   |
| Hs.96513.1.19 | chr2:234184070:234181908  | 234183312 | c | NM_018218    | 23 | CDS  | 55230  | USP40    | ubiquitin specific protease 40                                                                 |
| Hs.96852.1.8  | chr15:72714802:72712341   | 72714575  | c | NM_025083    | 6  | CDS  | 80153  | FLJ21128 | hypothetical protein FLJ21128                                                                  |
| Hs.97316.1.19 | chr2:233584970:233583266  | 233584817 | c | NM_019850    | 6  | CDS  | 25791  | NGEF     | neuronal guanine nucleotide exchange factor                                                    |
| Hs.97432.1.21 | chr2:46225153:46283882    | 46225214  | c | NM_005400    | 11 | CDS  | 5581   | PRKCE    | protein kinase C, epsilon                                                                      |
| Hs.9754.1.8   | chr19:55126098:55127490   | 55126196  | c | NM_012068    | 2  | CDS  | 22809  | ATF5     | activating transcription factor 5                                                              |
| Hs.97627.1.9  | chr7:106810989:106811708  | 106811161 | c | NM_181581    | 7  | CDS  | 11062  | DUS4L    | dihydropyridine synthase 4-like (S. cerevisiae)                                                |
| Hs.97997.1.29 | chr5:31500099:31487505    | 31499952  | c | NM_013235    | 19 | CDS  | 29102  | RNASEN   | ribonuclease III, nuclear                                                                      |
| Hs.97997.1.48 | chr5:31561942:31557080    | 31561590  | c | NM_013235    | 4  | CDS  | 29102  | RNASEN   | ribonuclease III, nuclear                                                                      |
| Hs.98041.1.10 | chr14:67287521:67285110   | 67286943  | c | NM_015346    | 41 | CDS  | 23503  | ZFYVE26  | zinc finger, FYVE domain containing 26                                                         |
| Hs.98117.1.26 | chr13:45844076:45840952   | 45843451  | c | NM_025113    | 2  | CDS  | 80183  | C13orf18 | chromosome 13 open reading frame 18                                                            |
| Hs.98255.1.4  | chr9:91568377:91566945    | 91568284  | c | NM_004560    | 8  | CDS  | 4920   | ROR2     | receptor tyrosine kinase-like orphan receptor 2                                                |
| Hs.98262.1.11 | chr6:102444432:102479168  | 102444700 | c | NM_021956    | 11 | CDS  | 2898   | GRIK2    | glutamate receptor, ionotropic, kainate 2                                                      |

|                |                           |           |   |              |    |      |        |           |                                                                                              |
|----------------|---------------------------|-----------|---|--------------|----|------|--------|-----------|----------------------------------------------------------------------------------------------|
| Hs.98328.1.7   | chr11:101451987:101457155 | 101452052 | c | NM_032930    | 4  | CDS  | 85016  | MGC13040  | hypothetical protein MGC13040                                                                |
| Hs.98594.1.14  | chr8:1839025:1841143      | 1839123   | c | NM_014629    | 16 | CDS  | 9639   | ARHGEF10  | Rho guanine nucleotide exchange factor (GEF) 10                                              |
| Hs.98704.1.23  | chr3:114482691:114484947  | 114482891 | c | NM_033254    | 15 | CDS  | 91653  | BOC       | brother of CDO                                                                               |
| Hs.98704.1.9   | chr3:114452371:114469835  | 114453122 | c | NM_033254    | 4  | CDS  | 91653  | BOC       | brother of CDO                                                                               |
| Hs.99120.1.1   | chrY:13459450:13461881    | 13459738  | c | NM_004660    | 3  | CDS  | 8653   | DDX3Y     | DEAD (Asp-Glu-Ala-Asp) box polypeptide 3, Y-linked                                           |
| Hs.99120.1.11  | chrY:13464693:13464926    | 13464925  | c | NM_004660    | 8  | CDS  | 8653   | DDX3Y     | DEAD (Asp-Glu-Ala-Asp) box polypeptide 3, Y-linked                                           |
| Hs.99195.1.19  | chr4:22070436:22067076    | 22069954  | c | NM_145290    | 17 | CDS  | 166647 | GPR125    | G protein-coupled receptor 125                                                               |
| Hs.99195.1.31  | chr4:22098777:22091707    | 22097930  | c | NM_145290    | 12 | CDS  | 166647 | GPR125    | G protein-coupled receptor 125                                                               |
| Hs.99480.1.11  | chr8:27690606:27693609    | 27691953  | c | NM_001017420 | 3  | CDS  | 157570 | ESCO2     | establishment of cohesion 1 homolog 2 ( <i>S. cerevisiae</i> )                               |
| Hs.100914.1.50 | chr18:13106503:13107583   | 13107527  | s | NM_018069    | 37 | 3UTR | 55125  | Cep192    | centrosomal protein 192 kDa                                                                  |
| Hs.102471.1.5  | chr6:144116743:144123230  | 144118329 | s | NM_014721    | 4  | CDS  | 9749   | PHACTR2   | phosphatase and actin regulator 2                                                            |
| Hs.103183.1.11 | chrX:146719829:146723574  | 146720752 | s | M67468       | 9  | CDS  | 2332   | FMR1      | fragile X mental retardation 1                                                               |
| Hs.106513.1.3  | chr4:167304189:167318095  | 167309716 | s | NM_012464    | 9  | CDS  | 7092   | TLL1      | tolloid-like 1                                                                               |
| Hs.107101.1.11 | chr1:2157239:2153383      | 2155520   | s | NM_182533    | 3  | CDS  | 199990 | C1orf86   | chromosome 1 open reading frame 86                                                           |
| Hs.107196.1.15 | chr15:33617766:33534314   | 33599766  | s | NM_080650    | 3  | CDS  | 89978  | MGC14798  | similar to RIKEN cDNA 5730421E18 gene                                                        |
| Hs.108301.1.9  | chr12:93927592:93924769   | 93926653  | s | NM_003297    | 10 | CDS  | 7181   | NR2C1     | nuclear receptor subfamily 2, group C, member 1                                              |
| Hs.108530.1.15 | chr6:76025215:76022732    | 76024533  | s | NM_018247    | 6  | CDS  | 55754  | TMEM30A   | transmembrane protein 30A                                                                    |
| Hs.108614.1.48 | chr3:33619447:33613231    | 33618939  | s | NM_015097    | 18 | CDS  | 23122  | CLASP2    | cytoplasmic linker associated protein 2                                                      |
| Hs.109929.1.29 | chrX:48595638:48594533    | 48594722  | s | NM_020137    | 17 | CDS  | 56850  | GRIPAP1   | GRIP1 associated protein 1                                                                   |
| Hs.111286.1.7  | chr15:86812260:86819344   | 86816855  | s | NM_176805    | 2  | CDS  | 64963  | MRPS11    | mitochondrial ribosomal protein S11                                                          |
| Hs.111749.1.11 | chr2:190495987:190508248  | 190497078 | s | NM_000534    | 4  | CDS  | 5378   | PMS1      | PMS1 postmeiotic segregation increased 1 ( <i>S. cerevisiae</i> )                            |
| Hs.112556.1.20 | chr11:123116034:123106904 | 123114543 | s | NM_003455    | 3  | 5UTR | 7753   | ZNF202    | zinc finger protein 202                                                                      |
| Hs.112743.1.7  | chr1:115115473:115129168  | 115117772 | s | NM_003176    | 8  | CDS  | 6847   | SYCP1     | synaptonemal complex protein 1                                                               |
| Hs.112783.1.15 | chr6:143528014:143646939  | 143553432 | s | NM_016108    | 3  | CDS  | 51390  | AIG1      | androgen-induced 1                                                                           |
| Hs.113874.1.34 | chr17:26600264:26609487   | 26603948  | s | NM_000267    | 30 | CDS  | 4763   | NF1       | neurofibromin 1 (neurofibromatosis, von Recklinghausen disease, Watson disease)              |
| Hs.114198.1.9  | chr15:65710320:65725622   | 65720881  | s | NM_002757    | 9  | CDS  | 5607   | MAP2K5    | mitogen-activated protein kinase kinase 5                                                    |
| Hs.115099.1.17 | chr22:34919875:34915984   | 34918001  | s | NM_030643    | 4  | CDS  | 80832  | APOL4     | apolipoprotein L, 4                                                                          |
| Hs.115277.1.12 | chrY:13873565:13856262    | 13873045  | s | NM_007125    | 19 | CDS  | 7404   | UTY       | ubiquitously transcribed tetratricopeptide repeat gene, Y-linked                             |
| Hs.115461.1.4  | chr18:28808508:28772054   | 28791969  | s | NM_198995    | 22 | CDS  | 374864 | C18orf34  | chromosome 18 open reading frame 34                                                          |
| Hs.115474.1.25 | chr13:33307355:33438223   | 33309172  | s | NM_181558    | 8  | 3UTR | 5983   | RFC3      | replication factor C (activator 1) 3, 38kDa                                                  |
| Hs.115474.1.26 | chr13:33307355:33438223   | 33309633  | s | NM_181558    | 8  | 3UTR | 5983   | RFC3      | replication factor C (activator 1) 3, 38kDa                                                  |
| Hs.116029.1.6  | chr14:103110261:103123363 | 103110822 | s | NM_032374    | 3  | CDS  | 84334  | C14orf153 | chromosome 14 open reading frame 153                                                         |
| Hs.116448.1.27 | chr2:191621870:191643796  | 191623265 | s | NM_014905    | 14 | CDS  | 2744   | GLS       | glutaminase                                                                                  |
| Hs.116448.1.28 | chr2:191621870:191643796  | 191623344 | s | NM_014905    | 14 | CDS  | 2744   | GLS       | glutaminase                                                                                  |
| Hs.116470.1.4  | chr6:25558919:25574079    | 25560804  | s | NM_017640    | 8  | CDS  | 55604  | LRRRC16   | leucine rich repeat containing 16                                                            |
| Hs.117545.1.20 | chr5:58512177:58370556    | 58488675  | s | NM_006203    | 5  | CDS  | 5144   | PDE4D     | phosphodiesterase 4D, cAMP-specific (phosphodiesterase E3 dunce homolog, <i>Drosophila</i> ) |
| Hs.117545.1.23 | chr5:58512177:58488947    | 58505933  | s | BC008390     | 5  | CDS  | 5144   | PDE4D     | phosphodiesterase 4D, cAMP-specific (phosphodiesterase E3 dunce homolog, <i>Drosophila</i> ) |
| Hs.118722.1.20 | chr14:65205952:65269701   | 65258442  | s | NM_178157    | 1  | CDS  | 2530   | FUT8      | fucosyltransferase 8 (alpha (1,6) fucosyltransferase)                                        |
| Hs.118918.1.5  | chr17:8134884:8134028     | 8134527   | s | NM_201520    | 4  | CDS  | 399512 | SLC25A35  | solute carrier family 25, member 35                                                          |
| Hs.119316.1.26 | chr4:1530037528:152998296 | 153000712 | s | NM_004564    | 2  | CDS  | 5188   | PET112L   | PET112-like (yeast)                                                                          |
| Hs.119897.1.18 | chr10:134015248:134019283 | 134016890 | s | NM_030626    | 7  | CDS  | 80313  | LRRRC27   | leucine rich repeat containing 27                                                            |

|                |                           |           |   |              |    |      |        |           |                                                                                              |
|----------------|---------------------------|-----------|---|--------------|----|------|--------|-----------|----------------------------------------------------------------------------------------------|
| Hs.119897.1.23 | chr10:134029045:134038559 | 134030495 | s | NM_030626    | 10 | CDS  | 80313  | LRRC27    | leucine rich repeat containing 27                                                            |
| Hs.120330.1.10 | chr5:178511748:178499643  | 178510495 | s | NM_014244    | 10 | CDS  | 9509   | ADAMTS2   | a disintegrin-like and metalloprotease (reprolysin type) with thrombospondin type 1 motif, 2 |
| Hs.120658.1.21 | chr5:38954922:38957473    | 38955416  | s | NM_003999    | 11 | CDS  | 9180   | OSMR      | oncostatin M receptor                                                                        |
| Hs.120759.1.29 | chr2:21159456:21158217    | 21158694  | s | NM_000384    | 16 | CDS  | 338    | APOB      | apolipoprotein B (including Ag(x) antigen)                                                   |
| Hs.120963.1.17 | chr17:3674102:3672096     | 3672549   | s | NM_018553    | 2  | 5UTR | 55421  | HSA277841 | ELG protein                                                                                  |
| Hs.121335.1.11 | chr3:9743871:9746190      | 9744134   | s | NM_153635    | 19 | CDS  | 151835 | LOC151835 | copine family member                                                                         |
| Hs.122082.1.9  | chr5:78355849:78336987    | 78352256  | s | NM_013391    | 14 | CDS  | 29958  | DMGDH     | dimethylglycine dehydrogenase                                                                |
| Hs.122926.1.13 | chr5:142642325:142639170  | 142641569 | s | NM_001020825 | 8  | CDS  | 2908   | NR3C1     | nuclear receptor subfamily 3, group C, member 1 (glucocorticoid receptor)                    |
| Hs.122927.1.3  | chr2:29266763:29268171    | 29267387  | s | NM_024692    | 4  | CDS  | 79745  | RSNL2     | restin-like 2                                                                                |
| Hs.123116.1.4  | chr15:46300486:46305964   | 46300928  | s | BC040138     | 3  | CDS  | 6557   | SLC12A1   | solute carrier family 12 (sodium/potassium/chloride transporters), member 1                  |
| Hs.123116.1.9  | chr15:46314494:46321003   | 46316838  | s | NM_000338    | 8  | CDS  | 6557   | SLC12A1   | solute carrier family 12 (sodium/potassium/chloride transporters), member 1                  |
| Hs.123352.1.14 | chr18:12791968:12775844   | 12784038  | s | NM_080423    | 8  | CDS  | 5771   | PTPN2     | protein tyrosine phosphatase, non-receptor type 2                                            |
| Hs.12381.1.2   | chr12:127936580:127954750 | 127939886 | s | BC043528     | 7  | 3UTR | 144423 | FLJ31978  | hypothetical protein FLJ31978                                                                |
| Hs.12451.1.5   | chr14:99414710:99427288   | 99422195  | s | NM_001008707 | 5  | CDS  | 2009   | EML1      | echinoderm microtubule associated protein like 1                                             |
| Hs.124519.1.11 | chr13:35662082:35647007   | 35654129  | s | NM_017826    | 6  | CDS  | 54937  | FLJ20449  | hypothetical protein FLJ20449                                                                |
| Hs.125849.1.15 | chr8:37721373:37726234    | 37722508  | s | NM_007175    | 6  | CDS  | 11160  | SPFH2     | SPFH domain family, member 2                                                                 |
| Hs.125849.1.16 | chr8:37721373:37726234    | 37722570  | s | NM_007175    | 6  | CDS  | 11160  | SPFH2     | SPFH domain family, member 2                                                                 |
| Hs.125849.1.18 | chr8:37721373:37726234    | 37723224  | s | NM_007175    | 6  | CDS  | 11160  | SPFH2     | SPFH domain family, member 2                                                                 |
| Hs.126221.1.12 | chr21:44303524:44307846   | 44304564  | s | NM_003274    | 6  | CDS  | 7109   | TMEM1     | transmembrane protein 1                                                                      |
| Hs.12646.1.16  | chr7:139187218:139181673  | 139186826 | s | NM_022750    | 8  | CDS  | 64761  | PARP12    | poly (ADP-ribose) polymerase family, member 12                                               |
| Hs.127013.1.38 | chr3:62606436:62553464    | 62585945  | s | NM_003716    | 6  | CDS  | 8618   | CADPS     | Ca <sup>2+</sup> -dependent secretion activator                                              |
| Hs.127401.1.10 | chr2:27580262:27579968    | 27580131  | s | NM_015662    | 45 | CDS  | 26160  | SLB       | selective LIM binding factor, rat homolog                                                    |
| Hs.127401.1.21 | chr2:27587901:27584615    | 27587655  | s | NM_015662    | 35 | CDS  | 26160  | SLB       | selective LIM binding factor, rat homolog                                                    |
| Hs.127657.1.15 | chr3:158660671:158628980  | 158660113 | s | NM_024621    | 4  | CDS  | 79674  | VEPH1     | ventricular zone expressed PH domain homolog 1 (zebrafish)                                   |
| Hs.127657.1.16 | chr3:158660671:158628980  | 158660185 | s | NM_024621    | 4  | CDS  | 79674  | VEPH1     | ventricular zone expressed PH domain homolog 1 (zebrafish)                                   |
| Hs.127951.1.11 | chrX:19802725:19794101    | 19799123  | s | NM_152780    | 9  | CDS  | 256714 | FLJ14503  | hypothetical protein FLJ14503                                                                |
| Hs.128002.1.1  | chr17:9027012:9065209     | 9027718   | s | NM_004822    | 5  | CDS  | 9423   | NTN1      | netrin 1                                                                                     |
| Hs.128065.1.19 | chr11:87707752:87685371   | 87698907  | s | NM_001814    | 2  | CDS  | 1075   | CTSC      | cathepsin C                                                                                  |
| Hs.128067.1.31 | chr2:175265438:175262682  | 175264965 | s | NM_003387    | 4  | CDS  | 7456   | WASPIP    | Wiskott-Aldrich syndrome protein interacting protein                                         |
| Hs.128146.1.4  | chr3:57484349:57471747    | 57483196  | s | NM_198564    | 4  | CDS  | 375347 | FLJ44290  | FLJ44290 protein                                                                             |
| Hs.128279.1.6  | chr18:6036726:5959562     | 6019386   | s | AK093255     | 17 | CDS  | 91133  | L3MBTL4   | l(3)mbt-like 4 (Drosophila)                                                                  |
| Hs.12851.1.2   | chr11:450289:463894       | 450879    | s | NM_030783    | 2  | CDS  | 81490  | PTDSS2    | phosphatidyserine synthase 2                                                                 |
| Hs.128548.1.12 | chr4:9755196:9753378      | 9754801   | s | NM_005112    | 11 | CDS  | 9948   | WDR1      | WD repeat domain 1                                                                           |
| Hs.128594.1.11 | chr3:54761745:54773284    | 54762678  | s | NM_018398    | 12 | CDS  | 55799  | CACNA2D3  | calcium channel, voltage-dependent, alpha 2/delta 3 subunit                                  |
| Hs.128696.1.26 | chr5:55043036:55029578    | 55035869  | s | NM_173514    | 2  | 5UTR | 153129 | FLJ90709  | hypothetical protein FLJ90709                                                                |
| Hs.129165.1.11 | chr19:42530615:42544850   | 42542518  | s | NM_181786    | 5  | CDS  | 284459 | HKR1      | GLI-Kruppel family member HKR1                                                               |
| Hs.129195.1.9  | chr10:126360165:126302164 | 126345749 | s | NM_014661    | 4  | CDS  | 9679   | FAM53B    | family with sequence similarity 53, member B                                                 |
| Hs.129702.1.16 | chr20:17437533:17427686   | 17435473  | s | NM_001195    | 5  | CDS  | 631    | BFSP1     | beaded filament structural protein 1, filensin                                               |
| Hs.130262.1.7  | chr16:1389375:1387298     | 1388307   | s | NM_024023    | 7  | CDS  | 64718  | UNKL      | unkempt-like (Drosophila)                                                                    |
| Hs.130535.1.6  | chr4_random:915541:900450 | 913902    | s | NM_001004347 | 3  | 3UTR | 441058 | MGC39584  | hypothetical gene supported by BC029568                                                      |



|                |                          |           |   |              |    |      |        |          |                                                               |
|----------------|--------------------------|-----------|---|--------------|----|------|--------|----------|---------------------------------------------------------------|
| Hs.130690.1.20 | chr13:99341693:99355524  | 99342821  | s | NM_138280    | 8  | 3UTR | 171425 | CLYBL    | citrate lyase beta like                                       |
| Hs.130979.1.3  | chr15:79223217:79227253  | 79226833  | s | BC062471     | 5  | CDS  | 161502 | C15orf26 | chromosome 15 open reading frame 26                           |
| Hs.131704.1.14 | chr10:33526583:33521353  | 33523309  | s | BX648250     | 12 | CDS  | 8829   | NRP1     | neuropilin 1                                                  |
| Hs.131704.1.15 | chr10:33526583:33521353  | 33524358  | s | BX648250     | 12 | CDS  | 8829   | NRP1     | neuropilin 1                                                  |
| Hs.131704.1.21 | chr10:33536505:33531930  | 33534381  | s | BX648250     | 10 | CDS  | 8829   | NRP1     | neuropilin 1                                                  |
| Hs.131903.1.17 | chr6:169876003:169869737 | 169875490 | s | NM_182552    | 13 | CDS  | 253769 | WDR27    | WD repeat domain 27                                           |
| Hs.131903.1.3  | chr6:169790146:169675362 | 169776053 | s | NM_182552    | 25 | CDS  | 253769 | WDR27    | WD repeat domain 27                                           |
| Hs.132310.1.2  | chr11:59568824:59570992  | 59570940  | s | NM_173801    | 3  | CDS  | 219990 | FLJ36198 | hypothetical protein FLJ36198                                 |
| Hs.132439.1.23 | chr7:102756419:102753915 | 102754658 | s | NM_005045    | 48 | CDS  | 5649   | RELN     | reelin                                                        |
| Hs.132441.1.16 | chr5:126278520:126241986 | 126262464 | s | NM_178450    | 3  | CDS  | 115123 | MARCH3   | membrane-associated ring finger (C3HC4) 3                     |
| Hs.132513.1.8  | chr11:43732248:43776445  | 43733656  | s | NM_016142    | 3  | CDS  | 51144  | HSD17B12 | hydroxysteroid (17-beta) dehydrogenase 12                     |
| Hs.132593.1.15 | chr4:122132177:122100106 | 122116764 | s | NM_018699    | 3  | CDS  | 11107  | PRDM5    | PR domain containing 5                                        |
| Hs.13291.1.24  | chr4:78442812:78457287   | 78445108  | s | BC032518     | 7  | CDS  | 901    | CCNG2    | cyclin G2                                                     |
| Hs.132954.1.4  | chr6:161940296:161778321 | 161936555 | s | NM_004562    | 9  | CDS  | 5071   | PARK2    | Parkinson disease (autosomal recessive, juvenile) 2, parkin   |
| Hs.133062.1.3  | chr4:5451193:5518005     | 5465254   | s | NM_018401    | 4  | CDS  | 55351  | STK32B   | serine/threonine kinase 32B                                   |
| Hs.13318.1.7   | chr1:228260999:228401308 | 228309168 | s | NM_001012957 | 9  | CDS  | 27185  | DISC1    | disrupted in schizophrenia 1                                  |
| Hs.133205.1.12 | chr9:130843476:130834988 | 130842958 | s | NM_032843    | 1  | CDS  | 84929  | FIBCD1   | fibrinogen C domain containing 1                              |
| Hs.133321.1.11 | chrX:154300262:154285861 | 154285900 | s | NM_018196    | 6  | CDS  | 55217  | TMLHE    | trimethyllysine hydroxylase, epsilon                          |
| Hs.133352.1.18 | chrX:53853587:53849971   | 53852072  | s | NM_015107    | 20 | CDS  | 23133  | PHF8     | PHD finger protein 8                                          |
| Hs.133352.1.21 | chrX:53853587:53849971   | 53852710  | s | NM_015107    | 20 | CDS  | 23133  | PHF8     | PHD finger protein 8                                          |
| Hs.13349.1.19  | chr1:201682806:201688202 | 201685110 | s | NM_001005388 | 21 | CDS  | 23114  | NFASC    | neurofascin                                                   |
| Hs.133982.1.8  | chr17:59491560:59489086  | 59489182  | s | NM_001433    | 11 | CDS  | 2081   | ERN1     | endoplasmic reticulum to nucleus signalling 1                 |
| Hs.134035.1.2  | chr1:154616054:154610488 | 154613777 | s | AY358494     | 5  | CDS  | 922    | CD5L     | CD5 antigen-like (scavenger receptor cysteine rich family)    |
| Hs.134470.1.10 | chr17:52694553:52833738  | 52797381  | s | NM_138962    | 5  | CDS  | 124540 | MSI2     | musashi homolog 2 (Drosophila)                                |
| Hs.134470.1.26 | chr17:53059664:53084458  | 53065262  | s | NM_138962    | 10 | CDS  | 124540 | MSI2     | musashi homolog 2 (Drosophila)                                |
| Hs.134470.1.8  | chr17:52694553:52833738  | 52706835  | s | NM_138962    | 5  | CDS  | 124540 | MSI2     | musashi homolog 2 (Drosophila)                                |
| Hs.134585.1.14 | chr2:215801825:215754449 | 215765721 | s | NM_173076    | 2  | CDS  | 26154  | ABCA12   | ATP-binding cassette, sub-family A (ABC1), member 12          |
| Hs.134857.1.4  | chr1:241573032:241576587 | 241576304 | s | NM_032328    | 6  | CDS  | 84288  | EFCAB2   | EF-hand calcium binding domain 2                              |
| Hs.135087.1.7  | chr1:151221660:151233673 | 151223634 | s | NM_000565    | 6  | CDS  | 3570   | IL6R     | interleukin 6 receptor                                        |
| Hs.135665.1.4  | chr11:22663912:22704413  | 22680752  | s | NM_005256    | 2  | CDS  | 2620   | GAS2     | growth arrest-specific 2                                      |
| Hs.135763.1.20 | chr4:26695876:26700409   | 26697405  | s | NM_020860    | 11 | CDS  | 57620  | STIM2    | stromal interaction molecule 2                                |
| Hs.136102.1.49 | chr13:45475274:45461234  | 45473299  | s | NM_015070    | 8  | CDS  | 23091  | KIAA0853 | KIAA0853                                                      |
| Hs.136829.1.17 | chr9:3320258:3291621     | 3313962   | s | NM_002919    | 5  | CDS  | 5991   | RFX3     | regulatory factor X, 3 (influences HLA class II expression)   |
| Hs.136829.1.21 | chr9:3336666:3320518     | 3334732   | s | NM_002919    | 4  | CDS  | 5991   | RFX3     | regulatory factor X, 3 (influences HLA class II expression)   |
| Hs.136829.1.6  | chr9:3238031:3218890     | 3237506   | s | NM_134428    | 16 | CDS  | 5991   | RFX3     | regulatory factor X, 3 (influences HLA class II expression)   |
| Hs.137270.1.9  | chr10:23310636:23327082  | 23318965  | s | NM_173081    | 10 | CDS  | 219681 | ARMC3    | armadillo repeat containing 3                                 |
| Hs.137415.1.13 | chr2:36926071:36940094   | 36926848  | s | NM_053276    | 12 | CDS  | 5212   | VIT      | vitrin                                                        |
| Hs.137459.1.1  | chr4:77834096:77988487   | 77837908  | s | NM_020859    | 2  | CDS  | 57619  | SHRM     | shroom                                                        |
| Hs.137459.1.5  | chr4:77834096:77988487   | 77923977  | s | NM_020859    | 2  | CDS  | 57619  | SHRM     | shroom                                                        |
| Hs.137556.1.19 | chr10:85963085:85968814  | 85967102  | s | BC038799     | 16 | CDS  | 92211  | PCDH21   | protocadherin 21                                              |
| Hs.137570.1.4  | chr9:88882461:88858045   | 88881833  | s | NM_016848    | 11 | CDS  | 53358  | SHC3     | SHC (Src homology 2 domain containing) transforming protein 3 |
| Hs.142442.1.39 | chr1:20848395:20845410   | 20847454  | s | NM_016287    | 3  | CDS  | 50809  | HP1BP3   | heterochromatin protein 1, binding protein 3                  |
| Hs.1430.1.12   | chr4:187576884:187580394 | 187578372 | s | NM_000128    | 10 | CDS  | 2160   | F11      | coagulation factor XI (plasma thromboplastin antecedent)      |
| Hs.143845.1.5  | chr14:93544683:93546969  | 93544962  | s | AK097741     | 8  | 3UTR | 256369 | C14orf48 | chromosome 14 open reading frame 48                           |
| Hs.143929.1.9  | chr12:10171612:10169315  | 10171189  | s | NM_022570    | 2  | CDS  | 64581  | CLEC7A   | C-type lectin domain family 7, member A                       |
| Hs.144496.1.15 | chr6:1875335:1687820     | 1872787   | s | NM_001500    | 7  | CDS  | 2762   | GMDS     | GDP-mannose 4,6-dehydratase                                   |

|                |                           |           |   |              |    |      |        |           |                                                                                      |
|----------------|---------------------------|-----------|---|--------------|----|------|--------|-----------|--------------------------------------------------------------------------------------|
| Hs.144795.1.32 | chr10:78441730:78399832   | 78403757  | s | NM_001014797 | 19 | CDS  | 3778   | KCNMA1    | potassium large conductance calcium-activated channel, subfamily M, alpha member 1   |
| Hs.144795.1.35 | chr10:78441730:78399832   | 78425051  | s | NM_001014797 | 19 | CDS  | 3778   | KCNMA1    | potassium large conductance calcium-activated channel, subfamily M, alpha member 1   |
| Hs.144795.1.36 | chr10:78441730:78399832   | 78425234  | s | NM_001014797 | 19 | CDS  | 3778   | KCNMA1    | potassium large conductance calcium-activated channel, subfamily M, alpha member 1   |
| Hs.144795.1.39 | chr10:78448776:78441808   | 78441963  | s | NM_001014797 | 18 | CDS  | 3778   | KCNMA1    | potassium large conductance calcium-activated channel, subfamily M, alpha member 1   |
| Hs.145251.1.10 | chr14:37039095:37085860   | 37046746  | s | NM_138731    | 13 | CDS  | 145282 | MIPOL1    | mirror-image polydactyly 1                                                           |
| Hs.145251.1.4  | chr14:36809482:36824273   | 36817828  | s | NM_138731    | 7  | CDS  | 145282 | MIPOL1    | mirror-image polydactyly 1                                                           |
| Hs.145469.1.10 | chr1:189721883:189717183  | 189719393 | s | NM_015984    | 10 | CDS  | 51377  | UCHL5     | ubiquitin carboxyl-terminal hydrolase L5                                             |
| Hs.145469.1.9  | chr1:189721883:189717183  | 189719192 | s | NM_015984    | 10 | CDS  | 51377  | UCHL5     | ubiquitin carboxyl-terminal hydrolase L5                                             |
| Hs.145586.1.35 | chrX:107360122:107270750  | 107317017 | s | NM_001847    | 3  | CDS  | 1288   | COL4A6    | collagen, type IV, alpha 6                                                           |
| Hs.145956.1.12 | chr19:49368946:49371490   | 49371242  | s | NM_016444    | 6  | CDS  | 7769   | ZNF226    | zinc finger protein 226                                                              |
| Hs.146070.1.34 | chr1:150976734:150961798  | 150972809 | s | BC008425     | 2  | CDS  | 7170   | TPM3      | tropomyosin 3                                                                        |
| Hs.14611.1.20  | chr2:73912581:73908108    | 73912035  | s | NM_003584    | 4  | CDS  | 8446   | DUSP11    | dual specificity phosphatase 11 (RNA/RNP complex 1-interacting)                      |
| Hs.146162.1.19 | chr4:147795794:147788807  | 147792659 | s | NM_032128    | 2  | CDS  | 84068  | C4orf13   | chromosome 4 open reading frame 13                                                   |
| Hs.146406.1.17 | chr1:157903096:157907003  | 157903928 | s | BC046149     | 6  | CDS  | 4817   | NIT1      | nitrilase 1                                                                          |
| Hs.146406.1.18 | chr1:157903096:157907003  | 157904057 | s | BC046149     | 6  | CDS  | 4817   | NIT1      | nitrilase 1                                                                          |
| Hs.146542.1.15 | chr1:71875711:71788851    | 71857340  | s | BX538014     | 4  | CDS  | 257194 | NEGR1     | neuronal growth regulator 1                                                          |
| Hs.1466.1.2    | chrX:30455227:30468896    | 30455888  | s | NM_000167    | 4  | CDS  | 2710   | GK        | glycerol kinase                                                                      |
| Hs.147064.1.2  | chr9:110168009:110146368  | 110164296 | s | NM_001003936 | 4  | CDS  | 255220 | TXNDC8    | thioredoxin domain containing 8                                                      |
| Hs.14791.1.10  | chr11:133634850:133636147 | 133635267 | s | NM_014384    | 6  | CDS  | 27034  | ACAD8     | acyl-Coenzyme A dehydrogenase family, member 8                                       |
| Hs.14791.1.23  | chr11:133637727:133640011 | 133638204 | s | NM_014384    | 10 | CDS  | 27034  | ACAD8     | acyl-Coenzyme A dehydrogenase family, member 8                                       |
| Hs.148741.1.2  | chr6:18507910:18535790    | 18510309  | s | NM_182757    | 2  | CDS  | 255488 | IBRDC2    | IBR domain containing 2                                                              |
| Hs.148767.1.16 | chr2:219282936:219284335  | 219284073 | s | NM_005444    | 7  | CDS  | 9125   | RQCD1     | RCD1 required for cell differentiation1 homolog (S. pombe)                           |
| Hs.148768.1.7  | chr7:102489179:102477445  | 102488343 | s | NM_182634    | 9  | CDS  | 349152 | FLJ36166  | hypothetical protein FLJ36166                                                        |
| Hs.148841.1.6  | chr9:115147830:115218474  | 115173161 | s | NM_017418    | 4  | 5UTR | 50514  | DEC1      | deleted in esophageal cancer 1                                                       |
| Hs.148909.1.2  | chr3:261376:336365        | 265284    | s | NM_006614    | 2  | 5UTR | 10752  | CHL1      | cell adhesion molecule with homology to L1CAM (close homolog of L1)                  |
| Hs.149103.1.10 | chr5:78170934:78113554    | 78147296  | s | NM_000046    | 6  | CDS  | 411    | ARSB      | arylsulfatase B                                                                      |
| Hs.149261.1.11 | chr21:35128576:35093630   | 35115446  | s | NM_001001890 | 4  | CDS  | 861    | RUNX1     | runt-related transcription factor 1 (acute myeloid leukemia 1; aml1 oncogene)        |
| Hs.149360.1.6  | chr1:86530562:86526583    | 86527798  | s | NM_001007022 | 15 | CDS  | 57489  | KIAA1229  | KIAA1229 protein                                                                     |
| Hs.149360.1.7  | chr1:86530562:86526583    | 86529610  | s | NM_001007022 | 15 | CDS  | 57489  | KIAA1229  | KIAA1229 protein                                                                     |
| Hs.149809.1.25 | chr6:71047235:71041197    | 71046186  | s | NM_001851    | 10 | CDS  | 1297   | COL9A1    | collagen, type IX, alpha 1                                                           |
| Hs.149849.1.5  | chr10:90064202:90024770   | 90034987  | s | NM_018363    | 6  | CDS  | 55328  | C10orf59  | chromosome 10 open reading frame 59                                                  |
| Hs.149849.1.6  | chr10:90064202:90024770   | 90035077  | s | NM_018363    | 6  | CDS  | 55328  | C10orf59  | chromosome 10 open reading frame 59                                                  |
| Hs.150122.1.27 | chr3:31846535:31764617    | 31838624  | s | NM_017784    | 5  | CDS  | 114884 | OSBPL10   | oxysterol binding protein-like 10                                                    |
| Hs.150816.1.3  | chr2:208598743:208551493  | 208590271 | s | AK123204     | 4  | CDS  | 389072 | LOC389072 | hypothetical protein LOC389072                                                       |
| Hs.150878.1.12 | chr11:60232831:60239069   | 60236076  | s | NM_031457    | 5  | CDS  | 83661  | MS4A8B    | membrane-spanning 4-domains, subfamily A, member 8B                                  |
| Hs.152803.1.5  | chr10:686383:697965       | 688595    | s | AK096013     | 1  | CDS  | 414235 | C10orf108 | chromosome 10 open reading frame 108                                                 |
| Hs.153629.1.18 | chr19:19152494:19122574   | 19148715  | s | NM_005919    | 5  | 5UTR | 4207   | MEF2B     | MADS box transcription enhancer factor 2, polypeptide B (myocyte enhancer factor 2B) |

|                |                           |           |   |              |    |      |        |          |                                                                            |
|----------------|---------------------------|-----------|---|--------------|----|------|--------|----------|----------------------------------------------------------------------------|
| Hs.153863.1.3  | chr15:64795891:64860388   | 64796929  | s | NM_005585    | 3  | CDS  | 4091   | SMAD6    | SMAD, mothers against DPP homolog 6 (Drosophila)                           |
| Hs.153952.1.16 | chr6:86257095:86258413    | 86257679  | s | NM_002526    | 7  | CDS  | 4907   | NT5E     | 5'-nucleotidase, ecto (CD73)                                               |
| Hs.153952.1.17 | chr6:86257095:86258413    | 86257762  | s | NM_002526    | 7  | CDS  | 4907   | NT5E     | 5'-nucleotidase, ecto (CD73)                                               |
| Hs.1544.1.11   | chr10:86004180:86008243   | 86005176  | s | NM_001012722 | 5  | CDS  | 5995   | RGR      | retinal G protein coupled receptor                                         |
| Hs.155204.1.6  | chr16:3394650:3398321     | 3395044   | s | NM_003450    | 2  | CDS  | 7727   | ZNF174   | zinc finger protein 174                                                    |
| Hs.155218.1.11 | chr19:46476922:46478907   | 46478873  | s | NM_007040    | 6  | CDS  | 11100  | HNRPUL1  | heterogeneous nuclear ribonucleoprotein U-like 1                           |
| Hs.155348.1.4  | chr7:15178378:15014225    | 15119100  | s | NM_001004320 | 12 | CDS  | 392636 | FLJ16237 | FLJ16237 protein                                                           |
| Hs.155959.1.4  | chr7:3634457:3763795      | 3637290   | s | NM_152744    | 5  | CDS  | 221935 | SDK1     | sidekick homolog 1 (chicken)                                               |
| Hs.155959.1.8  | chr7:3764794:3771803      | 3771157   | s | NM_152744    | 7  | CDS  | 221935 | SDK1     | sidekick homolog 1 (chicken)                                               |
| Hs.156316.1.18 | chr12:90074586:90060963   | 90065879  | s | NM_001920    | 2  | CDS  | 1634   | DCN      | decorin                                                                    |
| Hs.156727.1.17 | chr5:14794935:14769945    | 14794342  | s | NM_054027    | 8  | CDS  | 56172  | ANKH     | ankylosis, progressive homolog (mouse)                                     |
| Hs.157277.1.9  | chr1:243797817:243790620  | 243796429 | s | NM_032752    | 8  | CDS  | 84838  | ZNF496   | zinc finger protein 496                                                    |
| Hs.157818.1.4  | chr3:157660363:157664192  | 157661176 | s | NM_003471    | 5  | CDS  | 7881   | KCNAB1   | potassium voltage-gated channel, shaker-related subfamily, beta member 1   |
| Hs.159430.1.6  | chr3:173334039:173427362  | 173387785 | s | NM_022763    | 2  | CDS  | 64778  | FNDC3B   | fibronectin type III domain containing 3B                                  |
| Hs.159918.1.41 | chr7:10874953:10924216    | 10916522  | s | NM_001007157 | 16 | CDS  | 9678   | PHF14    | PHD finger protein 14                                                      |
| Hs.160324.1.75 | chr21:34130807:34150909   | 34132577  | s | NM_003024    | 29 | CDS  | 6453   | ITSN1    | intersectin 1 (SH3 domain protein)                                         |
| Hs.160324.1.77 | chr21:34130807:34150909   | 34132669  | s | NM_003024    | 29 | CDS  | 6453   | ITSN1    | intersectin 1 (SH3 domain protein)                                         |
| Hs.160411.1.11 | chr14:80644550:80675775   | 80645037  | s | NM_000369    | 8  | CDS  | 7253   | TSHR     | thyroid stimulating hormone receptor                                       |
| Hs.160556.1.60 | chr17:32761225:32720544   | 32760014  | s | NM_000664    | 3  | CDS  | 31     | ACACA    | acetyl-Coenzyme A carboxylase alpha                                        |
| Hs.160556.1.62 | chr17:32796496:32776453   | 32791261  | s | NM_198839    | 4  | 5UTR | 31     | ACACA    | acetyl-Coenzyme A carboxylase alpha                                        |
| Hs.160562.1.10 | chr12:101315753:101298812 | 101313736 | s | NM_000618    | 3  | CDS  | 3479   | IGF1     | insulin-like growth factor 1 (somatomedin C)                               |
| Hs.161429.1.14 | chr4:107008261:107101714  | 107091995 | s | NM_024751    | 5  | CDS  | 79807  | FLJ13273 | hypothetical protein FLJ13273                                              |
| Hs.162129.1.9  | chr5:80418529:80424375    | 80420141  | s | NM_006909    | 9  | CDS  | 5924   | RASGRF2  | Ras protein-specific guanine nucleotide-releasing factor 2                 |
| Hs.162757.1.4  | chr12:55825541:55834257   | 55830103  | s | NM_002332    | 6  | CDS  | 4035   | LRP1     | low density lipoprotein-related protein 1 (alpha-2-macroglobulin receptor) |
| Hs.162996.1.26 | chr18:45112231:45066985   | 45101493  | s | NM_017653    | 8  | CDS  | 54808  | DYM      | dymeclin                                                                   |
| Hs.164453.1.10 | chr7:43292584:43304913    | 43297454  | s | NM_015052    | 14 | CDS  | 23072  | HECW1    | HECT, C2 and WW domain containing E3 ubiquitin protein ligase 1            |
| Hs.16529.1.19  | chr7:120090702:120074115  | 120089116 | s | NM_012338    | 2  | CDS  | 23554  | TSPAN12  | tetraspanin 12                                                             |
| Hs.165859.1.16 | chr2:69263427:69290951    | 69273952  | s | NM_032208    | 12 | CDS  | 84168  | ANTXR1   | anthrax toxin receptor 1                                                   |
| Hs.165859.1.23 | chr2:69263427:69290951    | 69285139  | s | NM_032208    | 12 | CDS  | 84168  | ANTXR1   | anthrax toxin receptor 1                                                   |
| Hs.165859.1.24 | chr2:69263427:69290951    | 69285185  | s | NM_032208    | 12 | CDS  | 84168  | ANTXR1   | anthrax toxin receptor 1                                                   |
| Hs.165859.1.28 | chr2:69309073:69320568    | 69311341  | s | NM_032208    | 14 | CDS  | 84168  | ANTXR1   | anthrax toxin receptor 1                                                   |
| Hs.166068.1.10 | chr2:219164857:219156405  | 219161921 | s | NM_020935    | 20 | CDS  | 57695  | USP37    | ubiquitin specific protease 37                                             |
| Hs.166068.1.16 | chr2:219220183:219200369  | 219218499 | s | NM_020935    | 10 | CDS  | 57695  | USP37    | ubiquitin specific protease 37                                             |
| Hs.166539.1.10 | chr1:63631609:63625307    | 63627150  | s | U37139       | 7  | CDS  | 23421  | ITGB3BP  | integrin beta 3 binding protein (beta3-endonexin)                          |
| Hs.166556.1.19 | chr19:54534483:54535319   | 54535096  | s | NM_001774    | 7  | CDS  | 951    | CD37     | CD37 antigen                                                               |
| Hs.169998.1.12 | chr4:15400827:15409631    | 15401558  | s | NM_004334    | 8  | CDS  | 683    | BST1     | bone marrow stromal cell antigen 1                                         |
| Hs.170009.1.4  | chr2:70592004:70588409    | 70588960  | s | AF149097     | 5  | CDS  | 7039   | TGFA     | transforming growth factor, alpha                                          |
| Hs.170422.1.23 | chr13:112792044:112796828 | 112792498 | s | AB002360     | 26 | CDS  | 23263  | MCF2L    | MCF.2 cell line derived transforming sequence-like                         |
| Hs.170422.1.5  | chr13:112747677:112762907 | 112749170 | s | NM_024979    | 4  | CDS  | 23263  | MCF2L    | MCF.2 cell line derived transforming sequence-like                         |
| Hs.170835.1.18 | chrX:152248914:152243534  | 152247863 | s | NM_017518    | 4  | CDS  | 55559  | UIP1     | 26S proteasome-associated UCH interacting protein 1                        |
| Hs.171190.1.15 | chr5:82590253:82684705    | 82642644  | s | NM_003401    | 7  | CDS  | 7518   | XRCC4    | X-ray repair complementing defective repair in Chinese hamster cells 4     |
| Hs.171265.1.25 | chr12:67011153:67007069   | 67007237  | s | NM_017440    | 2  | CDS  | 56890  | MDM1     | Mdm4, transformed 3T3 cell double minute 1, p53 binding protein (mouse)    |

|                |                           |           |   |              |    |      |        |          |                                                                                      |
|----------------|---------------------------|-----------|---|--------------|----|------|--------|----------|--------------------------------------------------------------------------------------|
| Hs.171909.1.2  | chrX:15577734:15581467    | 15579729  | s | NM_005089    | 3  | CDS  | 8233   | U2AF1L2  | U2(RNU2) small nuclear RNA auxiliary factor 1-like 2                                 |
| Hs.172028.1.35 | chr15:56744587:56725696   | 56734741  | s | NM_001110    | 5  | CDS  | 102    | ADAM10   | a disintegrin and metalloproteinase domain 10                                        |
| Hs.172562.1.17 | chr18:49196525:49215511   | 49196809  | s | NM_005215    | 21 | CDS  | 1630   | DCC      | deleted in colorectal carcinoma                                                      |
| Hs.172587.1.25 | chr14:68004721:68130954   | 68034253  | s | NM_133509    | 10 | CDS  | 5890   | RAD51L1  | RAD51-like 1 (S. cerevisiae)                                                         |
| Hs.172587.1.26 | chr14:68004721:68130954   | 68034351  | s | NM_133509    | 10 | CDS  | 5890   | RAD51L1  | RAD51-like 1 (S. cerevisiae)                                                         |
| Hs.173001.1.21 | chr1:91159887:91095733    | 91116778  | s | NM_016620    | 2  | CDS  | 84146  | ZNF644   | zinc finger protein 644                                                              |
| Hs.173894.1.10 | chr1:110179867:110183515  | 110180985 | s | NM_000757    | 8  | 3UTR | 1435   | CSF1     | colony stimulating factor 1 (macrophage)                                             |
| Hs.173984.1.8  | chr22:18128080:18144989   | 18129411  | s | NM_005992    | 8  | CDS  | 6899   | TBX1     | T-box 1                                                                              |
| Hs.173984.1.9  | chr22:18128080:18144989   | 18141623  | s | NM_005992    | 8  | CDS  | 6899   | TBX1     | T-box 1                                                                              |
| Hs.175534.1.15 | chr11:31660200:31741534   | 31693018  | s | NM_019040    | 10 | CDS  | 26610  | ELP4     | elongation protein 4 homolog (S. cerevisiae)                                         |
| Hs.176013.1.21 | chr20:20191775:20205809   | 20194261  | s | NM_015585    | 21 | CDS  | 26074  | C20orf26 | chromosome 20 open reading frame 26                                                  |
| Hs.178499.1.18 | chr11:129612114:129608488 | 129609292 | s | BC050723     | 4  | CDS  | 29068  | BTBD15   | BTB (POZ) domain containing 15                                                       |
| Hs.179238.1.8  | chr8:133691589:133665205  | 133689835 | s | NM_012472    | 10 | CDS  | 23639  | LRRC6    | leucine rich repeat containing 6                                                     |
| Hs.180346.1.11 | chr10:99351738:99361256   | 99351987  | s | NM_138413    | 6  | CDS  | 112817 | C10orf65 | chromosome 10 open reading frame 65                                                  |
| Hs.183114.1.24 | chr18:6886626:6889958     | 6888720   | s | NM_001010000 | 15 | CDS  | 79822  | ARHGAP28 | Rho GTPase activating protein 28                                                     |
| Hs.184727.1.10 | chr3:198236584:198232472  | 198234134 | s | NM_005929    | 6  | CDS  | 4241   | MF12     | antigen p97 (melanoma associated) identified by monoclonal antibodies 133.2 and 96.5 |
| Hs.185597.1.24 | chr16:88126546:88138556   | 88131630  | s | NM_003119    | 9  | CDS  | 6687   | SPG7     | spastic paraplegia 7, paraplegin (pure and complicated autosomal recessive)          |
| Hs.185774.1.3  | chr1:27989026:27985200    | 27987926  | s | NM_001990    | 17 | CDS  | 2140   | EYA3     | eyes absent homolog 3 (Drosophila)                                                   |
| Hs.18616.1.9   | chr7:157936456:157923886  | 157931964 | s | BC043404     | 27 | CDS  | 54892  | LUZP5    | leucine zipper protein 5                                                             |
| Hs.187763.1.32 | chr19:15225962:15216574   | 15221034  | s | NM_058243    | 11 | CDS  | 23476  | BRD4     | bromodomain containing 4                                                             |
| Hs.187763.1.33 | chr19:15225962:15221102   | 15224806  | s | NM_014299    | 11 | CDS  | 23476  | BRD4     | bromodomain containing 4                                                             |
| Hs.187898.1.28 | chr22:28403623:28415294   | 28404705  | s | NM_181832    | 16 | 3UTR | 4771   | NF2      | neurofibromin 2 (bilateral acoustic neuroma)                                         |
| Hs.187946.1.17 | chr2:113126607:113130929  | 113127163 | s | NM_005415    | 5  | CDS  | 6574   | SLC20A1  | solute carrier family 20 (phosphate transporter), member 1                           |
| Hs.188591.1.6  | chr11:86546097:86625327   | 86568014  | s | NM_022918    | 5  | CDS  | 65084  | FLJ22104 | hypothetical protein FLJ22104                                                        |
| Hs.188614.1.26 | chr12:19335899:19364762   | 19359328  | s | AB051473     | 14 | CDS  | 54477  | PLEKHA5  | pleckstrin homology domain containing, family A member 5                             |
| Hs.188614.1.4  | chr12:19176652:19298140   | 19245857  | s | NM_019012    | 3  | CDS  | 54477  | PLEKHA5  | pleckstrin homology domain containing, family A member 5                             |
| Hs.188614.1.5  | chr12:19176652:19298140   | 19246204  | s | NM_019012    | 3  | CDS  | 54477  | PLEKHA5  | pleckstrin homology domain containing, family A member 5                             |
| Hs.18925.1.28  | chr3:3189459:3184478      | 3188871   | s | NM_016302    | 4  | CDS  | 51185  | CRBN     | cereblon                                                                             |
| Hs.189445.1.44 | chr8:99115064:99117060    | 99115714  | s | NM_002380    | 18 | CDS  | 4147   | MATN2    | matrilin 2                                                                           |
| Hs.189652.1.23 | chr7:120478344:120500231  | 120495801 | s | NM_024913    | 18 | CDS  | 79974  | FLJ21986 | hypothetical protein FLJ21986                                                        |
| Hs.189652.1.24 | chr7:120478344:120500231  | 120495904 | s | NM_024913    | 18 | CDS  | 79974  | FLJ21986 | hypothetical protein FLJ21986                                                        |
| Hs.189915.1.38 | chr6:18095263:18006391    | 18058624  | s | NM_022113    | 2  | CDS  | 63971  | KIF13A   | kinesin family member 13A                                                            |
| Hs.190394.1.5  | chr19:58597257:58618126   | 58607071  | s | NM_138372    | 2  | CDS  | 91661  | LOC91661 | hypothetical protein BC001610                                                        |
| Hs.190544.1.29 | chr3:58373731:58385518    | 58381503  | s | NM_017771    | 17 | CDS  | 54899  | PXK      | PX domain containing serine/threonine kinase                                         |
| Hs.191186.1.55 | chr11:43422336:43426127   | 43424845  | s | NM_018259    | 18 | CDS  | 55761  | TTC17    | tetratricopeptide repeat domain 17                                                   |
| Hs.191186.1.62 | chr11:43429392:43468364   | 43446490  | s | NM_018259    | 21 | CDS  | 55761  | TTC17    | tetratricopeptide repeat domain 17                                                   |
| Hs.191540.1.17 | chr8:100274462:100355601  | 100291191 | s | NM_017890    | 17 | CDS  | 157680 | VPS13B   | vacuolar protein sorting 13B (yeast)                                                 |
| Hs.192215.1.9  | chr7:45475054:45490707    | 45477511  | s | NM_021116    | 8  | CDS  | 107    | ADCY1    | adenylate cyclase 1 (brain)                                                          |
| Hs.192619.1.21 | chr10:116611084:116649238 | 116613652 | s | BC037207     | 16 | CDS  | 57700  | KIAA1600 | KIAA1600                                                                             |
| Hs.193226.1.27 | chr13:95434058:95422927   | 95433778  | s | NM_020121    | 10 | CDS  | 55757  | UGCGL2   | UDP-glucose ceramide glucosyltransferase-like 2                                      |
| Hs.193226.1.29 | chr13:95436587:95434120   | 95435159  | s | NM_020121    | 9  | CDS  | 55757  | UGCGL2   | UDP-glucose ceramide glucosyltransferase-like 2                                      |
| Hs.193226.1.34 | chr13:95446317:95440329   | 95440395  | s | NM_020121    | 7  | CDS  | 55757  | UGCGL2   | UDP-glucose ceramide glucosyltransferase-like 2                                      |
| Hs.193584.1.11 | chr19:19777839:19767470   | 19770597  | s | AL136548     | 3  | CDS  | 91115  | ZNF506   | zinc finger protein 506                                                              |
| Hs.193584.1.6  | chr19:19765642:19764294   | 19764520  | s | AL136548     | 4  | 3UTR | 91115  | ZNF506   | zinc finger protein 506                                                              |

|                |                           |           |   |              |    |      |        |          |                                                                        |
|----------------|---------------------------|-----------|---|--------------|----|------|--------|----------|------------------------------------------------------------------------|
| Hs.193613.1.7  | chr7:128191228:128189391  | 128189557 | s | NM_012470    | 22 | 3UTR | 23534  | TNPO3    | transportin 3                                                          |
| Hs.194554.1.7  | chr10:114197216:114210272 | 114200474 | s | NM_145206    | 1  | CDS  | 143187 | VT11A    | vesicle transport through interaction with t-SNAREs homolog 1A (yeast) |
| Hs.194692.1.31 | chr20:33747712:33741902   | 33745915  | s | NM_021100    | 4  | CDS  | 9054   | NFS1     | NFS1 nitrogen fixation 1 (S. cerevisiae)                               |
| Hs.195313.1.6  | chr6:110836229:110750769  | 110820076 | s | AK127146     | 2  | 5UTR | 8528   | DDO      | D-aspartate oxidase                                                    |
| Hs.196534.1.8  | chr2:29356860:29355353    | 29355387  | s | NM_004304    | 22 | CDS  | 238    | ALK      | anaplastic lymphoma kinase (Ki-1)                                      |
| Hs.197320.1.19 | chr9:81454688:81437744    | 81444334  | s | NM_005077    | 13 | CDS  | 7088   | TLE1     | transducin-like enhancer of split 1 (E(sp1) homolog, Drosophila)       |
| Hs.198003.1.19 | chr9:133613613:133612132  | 133612998 | s | NM_007101    | 7  | CDS  | 1757   | SARDH    | sarcosine dehydrogenase                                                |
| Hs.198003.1.21 | chr9:133624440:133613719  | 133619797 | s | NM_007101    | 6  | CDS  | 1757   | SARDH    | sarcosine dehydrogenase                                                |
| Hs.200747.1.12 | chr14:75243804:75253956   | 75245373  | s | NM_015072    | 9  | CDS  | 23093  | TTL5     | tubulin tyrosine ligase-like family, member 5                          |
| Hs.200747.1.51 | chr14:75418999:75438237   | 75423403  | s | NM_015072    | 30 | CDS  | 23093  | TTL5     | tubulin tyrosine ligase-like family, member 5                          |
| Hs.200813.1.16 | chr3:132372430:132430069  | 132376672 | s | NM_024800    | 14 | CDS  | 79858  | NEK11    | NIMA (never in mitosis gene a)- related kinase 11                      |
| Hs.200813.1.17 | chr3:132372430:132430069  | 132386315 | s | NM_024800    | 14 | CDS  | 79858  | NEK11    | NIMA (never in mitosis gene a)- related kinase 11                      |
| Hs.20107.1.34  | chr14:103215636:103236744 | 103221986 | s | L04733       | 13 | CDS  | 3831   | KNS2     | kinesin 2 60/70kDa                                                     |
| Hs.20107.1.50  | chr14:103236822:103238163 | 103237634 | s | NM_182923    | 15 | 3UTR | 3831   | KNS2     | kinesin 2 60/70kDa                                                     |
| Hs.201709.1.2  | chr9:132404542:132442541  | 132418347 | s | NM_207417    | 4  | CDS  | 389799 | FLJ46082 | FLJ46082 protein                                                       |
| Hs.202166.1.21 | chr5:178978875:178977931  | 178977948 | s | NM_005520    | 5  | CDS  | 3187   | HNRPH1   | heterogeneous nuclear ribonucleoprotein H1 (H)                         |
| Hs.202207.1.19 | chr1:36566495:36558161    | 36563000  | s | NM_145047    | 5  | CDS  | 127700 | C1orf102 | chromosome 1 open reading frame 102                                    |
| Hs.202542.1.5  | chr17:75654001:75655898   | 75655164  | s | AK000760     | 10 | CDS  | 55036  | FLJ20753 | hypothetical protein FLJ20753                                          |
| Hs.203717.1.16 | chr2:216063550:216062530  | 216062568 | s | NM_212475    | 39 | CDS  | 2335   | FN1      | fibronectin 1                                                          |
| Hs.207459.1.7  | chr3:188239364:188251738  | 188243504 | s | NM_173217    | 3  | 5UTR | 6480   | ST6GAL1  | ST6 beta-galactosamide alpha-2,6-sialyltransferase 1                   |
| Hs.20797.1.17  | chr22:3967020:39628090    | 39609194  | s | NM_022098    | 4  | CDS  | 63929  | LOC63929 | hypothetical protein LOC63929                                          |
| Hs.208206.1.5  | chr4:122417383:122411423  | 122416209 | s | NM_024873    | 10 | CDS  | 79931  | TNIP3    | TNFAIP3 interacting protein 3                                          |
| Hs.208358.1.1  | chr21:32707193:32747490   | 32727463  | s | NM_058187    | 1  | CDS  | 59271  | C21orf63 | chromosome 21 open reading frame 63                                    |
| Hs.208388.1.9  | chr3:10056530:10058306    | 10057370  | s | NM_001018115 | 9  | CDS  | 2177   | FANCD2   | Fanconi anemia, complementation group D2                               |
| Hs.208673.1.15 | chr3:140839502:140780596  | 140835900 | s | NM_178177    | 2  | 5UTR | 349565 | NMNAT3   | nicotinamide nucleotide adenyltransferase 3                            |
| Hs.208765.1.28 | chr14:66705507:66716047   | 66707714  | s | BC030016     | 21 | CDS  | 10243  | GPHN     | gephyrin                                                               |
| Hs.208846.1.1  | chr14:71065841:71124040   | 71111563  | s | NM_015556    | 1  | 5UTR | 26037  | SIPA1L1  | signal-induced proliferation-associated 1 like 1                       |
| Hs.208961.1.8  | chr5:176495638:176551490  | 176497011 | s | NM_022455    | 2  | CDS  | 64324  | NSD1     | nuclear receptor binding SET domain protein 1                          |
| Hs.209095.1.12 | chr5:94229793:94160594    | 94228605  | s | NM_001002796 | 17 | CDS  | 79772  | MCTP1    | multiple C2-domains with two transmembrane regions 1                   |
| Hs.210377.1.4  | chr12:94832718:94815223   | 94829431  | s | NM_182496    | 2  | CDS  | 120935 | FLJ40089 | hypothetical protein FLJ40089                                          |
| Hs.212046.1.17 | chr5:102511636:102512754  | 102511903 | s | NM_015216    | 6  | CDS  | 23262  | KIAA0433 | KIAA0433 protein                                                       |
| Hs.213198.1.7  | chr13:19149863:19147125   | 19147530  | s | BC014184     | 7  | 3UTR | 55269  | PSPC1    | paraspeckle component 1                                                |
| Hs.213861.1.67 | chr6:112613131:112606128  | 112607630 | s | NM_002290    | 9  | CDS  | 3910   | LAMA4    | laminin, alpha 4                                                       |
| Hs.216226.1.13 | chr22:38096703:38102200   | 38098882  | s | NM_004711    | 3  | CDS  | 9145   | SYNGR1   | synaptogyrin 1                                                         |
| Hs.21631.1.5   | chr7:69044209:69345388    | 69200254  | s | NM_015570    | 4  | CDS  | 26053  | AUTS2    | autism susceptibility candidate 2                                      |
| Hs.217297.1.2  | chr9:18879747:18895779    | 18880788  | s | NM_152702    | 4  | CDS  | 206938 | C9orf94  | chromosome 9 open reading frame 94                                     |
| Hs.221127.1.14 | chr17:68244383:68157003   | 68220473  | s | NM_139177    | 7  | CDS  | 201266 | SLC39A11 | solute carrier family 39 (metal ion transporter), member 11            |
| Hs.221127.1.18 | chr17:68357367:68244454   | 68329339  | s | NM_139177    | 6  | CDS  | 201266 | SLC39A11 | solute carrier family 39 (metal ion transporter), member 11            |
| Hs.221889.1.13 | chr12:10757076:10753981   | 10754217  | s | NM_003651    | 5  | CDS  | 8531   | CSDA     | cold shock domain protein A                                            |
| Hs.222282.1.26 | chr7:92585236:92597573    | 92595021  | s | NM_017667    | 20 | CDS  | 55610  | FLJ20097 | hypothetical protein FLJ20097                                          |
| Hs.222494.1.23 | chr2:10735043:10698036    | 10724850  | s | NM_024894    | 12 | CDS  | 79954  | FLJ14075 | hypothetical LOC79954                                                  |
| Hs.222855.1.6  | chrX:13446160:13458264    | 13448016  | s | AK097032     | 3  | 3UTR | 170082 | MGC17403 | hypothetical protein MGC17403                                          |
| Hs.223894.1.8  | chr19:18043921:18041524   | 18042372  | s | NM_005535    | 9  | CDS  | 3594   | IL12RB1  | interleukin 12 receptor, beta 1                                        |
| Hs.224152.1.13 | chr13:112201359:112192013 | 112201122 | s | NM_006322    | 20 | CDS  | 10426  | TUBGCP3  | tubulin, gamma complex associated protein 3                            |
| Hs.224152.1.33 | chr13:112249934:112248181 | 112248797 | s | NM_006322    | 10 | CDS  | 10426  | TUBGCP3  | tubulin, gamma complex associated protein 3                            |

|                |                           |           |   |              |    |     |        |          |                                                                                              |
|----------------|---------------------------|-----------|---|--------------|----|-----|--------|----------|----------------------------------------------------------------------------------------------|
| Hs.224171.1.12 | chr17:4797887:4799115     | 4798261   | s | NM_001976    | 6  | CDS | 2027   | ENO3     | enolase 3 (beta, muscle)                                                                     |
| Hs.22500.1.4   | chr12:18358266:18365162   | 18358839  | s | NM_004570    | 6  | CDS | 5288   | PIK3C2G  | phosphoinositide-3-kinase, class 2, gamma polypeptide                                        |
| Hs.225014.1.11 | chr12:129444158:129437763 | 129441072 | s | NM_015347    | 11 | CDS | 23504  | KIAA0318 | RIM binding protein 2                                                                        |
| Hs.226483.1.25 | chrX:96490890:96660396    | 96530975  | s | NM_006729    | 26 | CDS | 1730   | DIAPH2   | diaphanous homolog 2 (Drosophila)                                                            |
| Hs.22653.1.11  | chr10:63889563:64052868   | 63910054  | s | NM_199451    | 4  | CDS | 22891  | ZNF365   | zinc finger protein 365                                                                      |
| Hs.227948.1.7  | chr18:59475044:59456338   | 59473797  | s | AF428135     | 6  | CDS | 6317   | SERPINB3 | serine (or cysteine) proteinase inhibitor, clade B (ovalbumin), member 3                     |
| Hs.232092.1.3  | chr1:1952112:1950637      | 1951563   | s | AK127388     | 4  | CDS | 85452  | KIAA1751 | KIAA1751                                                                                     |
| Hs.232375.1.7  | chr11:107511180:107514834 | 107512876 | s | NM_000019    | 5  | CDS | 38     | ACAT1    | acetyl-Coenzyme A acetyltransferase 1 (acetoacetyl Coenzyme A thiolase)                      |
| Hs.233404.1.10 | chr4:8127856:8112726      | 8126827   | s | AJ748601     | 15 | CDS | 84448  | ABLIM2   | actin binding LIM protein family, member 2                                                   |
| Hs.233495.1.13 | chr7:29886989:29942121    | 29903600  | s | BC053990     | 13 | CDS | 84725  | PLEKHA8  | pleckstrin homology domain containing, family A (phosphoinositide binding specific) member 8 |
| Hs.233495.1.15 | chr7:29886989:29942121    | 29931186  | s | BC053990     | 13 | CDS | 84725  | PLEKHA8  | pleckstrin homology domain containing, family A (phosphoinositide binding specific) member 8 |
| Hs.234786.1.17 | chr1:54785763:54808427    | 54786884  | s | NM_015547    | 15 | CDS | 26027  | THEA     | thioesterase, adipose associated                                                             |
| Hs.234786.1.21 | chr1:54785763:54808427    | 54788023  | s | NM_015547    | 15 | CDS | 26027  | THEA     | thioesterase, adipose associated                                                             |
| Hs.235782.1.32 | chr20:60770876:60773546   | 60772019  | s | NM_016354    | 11 | CDS | 28231  | SLCO4A1  | solute carrier organic anion transporter family, member 4A1                                  |
| Hs.239818.1.41 | chr3:139957293:139944322  | 139954420 | s | NM_006219    | 2  | CDS | 5291   | PIK3CB   | phosphoinositide-3-kinase, catalytic, beta polypeptide                                       |
| Hs.240056.1.10 | chr12:22688224:22703214   | 22688616  | s | NM_018638    | 2  | CDS | 55500  | ETNK1    | ethanolamine kinase 1                                                                        |
| Hs.24119.1.9   | chr1:194953968:194963361  | 194957318 | s | NM_133494    | 2  | CDS | 140609 | NEK7     | NIMA (never in mitosis gene a)-related kinase 7                                              |
| Hs.242635.1.20 | chr5:131955626:131958459  | 131956773 | s | NM_005732    | 11 | CDS | 10111  | RAD50    | RAD50 homolog (S. cerevisiae)                                                                |
| Hs.245869.1.17 | chr3:135377150:135360916  | 135375896 | s | NM_001005861 | 13 | CDS | 6259   | RYK      | RYK receptor-like tyrosine kinase                                                            |
| Hs.24601.1.32  | chr22:44267033:44290927   | 44282105  | s | NM_006486    | 14 | CDS | 2192   | FBLN1    | fibulin 1                                                                                    |
| Hs.246046.1.9  | chr12:7172102:7168601     | 7171376   | s | NM_031491    | 2  | CDS | 83758  | RBP5     | retinol binding protein 5, cellular                                                          |
| Hs.246344.1.40 | chr9:121002135:121006774  | 121003337 | s | BX640927     | 5  | UTR | 11064  | CEP1     | centrosomal protein 1                                                                        |
| Hs.247280.1.9  | chr20:338670:346169       | 339406    | s | NM_031228    | 2  | CDS | 10616  | C20orf18 | chromosome 20 open reading frame 18                                                          |
| Hs.248202.1.5  | chr17:9706133:9714788     | 9711019   | s | NM_004246    | 9  | CDS | 9340   | GLP2R    | glucagon-like peptide 2 receptor                                                             |
| Hs.248941.1.13 | chr5:68698085:68687537    | 68696453  | s | NM_001015891 | 2  | CDS | 6880   | TAF9     | TAF9 RNA polymerase II, TATA box binding protein (TBP)-associated factor, 32kDa              |
| Hs.250281.1.25 | chr20:44672491:44662084   | 44670755  | s | NM_001011554 | 4  | CDS | 64849  | SLC13A3  | solute carrier family 13 (sodium-dependent dicarboxylate transporter), member 3              |
| Hs.25121.1.9   | chr14:99258157:99261480   | 99259222  | s | NM_006668    | 12 | CDS | 10858  | CYP46A1  | cytochrome P450, family 46, subfamily A, polypeptide 1                                       |
| Hs.252387.1.33 | chr22:45180122:45155828   | 45179196  | s | NM_014246    | 2  | CDS | 9620   | CELSR1   | cadherin, EGF LAG seven-pass G-type receptor 1 (flamingo homolog, Drosophila)                |
| Hs.252543.1.12 | chr12:97530541:97510587   | 97520498  | s | NM_201612    | 2  | CDS | 121457 | IKIP     | IKK interacting protein                                                                      |
| Hs.252713.1.40 | chr2:5020988:5026773      | 5021623   | s | AK094181     | 12 | CDS | 51112  | TTC15    | tetratricopeptide repeat domain 15                                                           |
| Hs.253320.1.8  | chr2:111315214:111382596  | 111361825 | s | NM_018308    | 4  | CDS | 55289  | ACOXL    | acyl-Coenzyme A oxidase-like                                                                 |
| Hs.253576.1.4  | chr10:106129969:106141980 | 106132108 | s | NM_001008723 | 9  | CDS | 159686 | C10orf80 | chromosome 10 open reading frame 80                                                          |
| Hs.254335.1.5  | chr15:62259599:62245333   | 62250396  | s | AF223357     | 10 | CDS | 53944  | CSNK1G1  | casein kinase 1, gamma 1                                                                     |
| Hs.254699.1.3  | chr5:36001244:35993279    | 35996615  | s | NM_152404    | 4  | CDS | 133688 | UGT3A1   | UDP glycosyltransferase 3 family, polypeptide A1                                             |
| Hs.255008.1.1  | chr7:149821824:149827050  | 149824432 | s | NM_015660    | 2  | CDS | 26157  | GIMAP2   | GTPase, IMAP family member 2                                                                 |
| Hs.255462.1.6  | chr10:51225843:51232276   | 51226840  | s | NM_138634    | 2  | CDS | 4477   | MSMB     | microseminoprotein, beta-                                                                    |
| Hs.256526.1.5  | chr17:78011238:78019928   | 78015594  | s | BC016440     | 2  | CDS | 26502  | NARF     | nuclear prelamin A recognition factor                                                        |
| Hs.258326.1.17 | chr16:19143662:19185702   | 19168901  | s | NM_016524    | 7  | CDS | 51760  | SYT17    | synaptotagmin XVII                                                                           |
| Hs.258798.1.9  | chr10:123712742:123711023 | 123711262 | s | NM_017615    | 6  | CDS | 54780  | C10orf86 | chromosome 10 open reading frame 86                                                          |

|                |                           |           |   |              |    |      |        |             |                                                                                              |
|----------------|---------------------------|-----------|---|--------------|----|------|--------|-------------|----------------------------------------------------------------------------------------------|
| Hs.259461.1.5  | chr9:109773864:109857788  | 109787122 | s | NM_007203    | 6  | CDS  | 445815 | PALM2-AKAP2 | PALM2-AKAP2 protein                                                                          |
| Hs.2637.1.5    | chr1:193489186:193490831  | 193490809 | s | NM_021023    | 4  | CDS  | 10878  | CFHL3       | complement factor H-related 3                                                                |
| Hs.266728.1.4  | chr13:51243957:51241431   | 51242921  | s | NM_024705    | 7  | CDS  | 79758  | FLJ13639    | hypothetical protein FLJ13639                                                                |
| Hs.268698.1.10 | chr6:151301232:151318899  | 151312250 | s | NM_015440    | 7  | CDS  | 25902  | MTHFD1L     | methylenetetrahydrofolate dehydrogenase (NADP+ dependent) 1-like                             |
| Hs.268707.1.5  | chr11:99378079:99437153   | 99379923  | s | NM_014361    | 9  | CDS  | 53942  | CNTN5       | contactin 5                                                                                  |
| Hs.269004.1.7  | chr5:150839244:150847736  | 150839898 | s | NM_078483    | 10 | CDS  | 206358 | SLC36A1     | solute carrier family 36 (proton/amino acid symporter), member 1                             |
| Hs.269127.1.7  | chrX:133674400:133688775  | 133681509 | s | NM_138819    | 2  | CDS  | 159091 | RP3-473B4.1 | hypothetical protein BC017868                                                                |
| Hs.269180.1.10 | chr9:109085452:109058981  | 109083277 | s | NM_019114    | 15 | CDS  | 54566  | EPB41L4B    | erythrocyte membrane protein band 4.1 like 4B                                                |
| Hs.269180.1.7  | chr9:109085452:109058981  | 109081993 | s | NM_019114    | 15 | CDS  | 54566  | EPB41L4B    | erythrocyte membrane protein band 4.1 like 4B                                                |
| Hs.269665.1.14 | chr4:56579053:56585010    | 56582312  | s | NM_018261    | 8  | CDS  | 55763  | SEC3L1      | SEC3-like 1 (S. cerevisiae)                                                                  |
| Hs.269665.1.18 | chr4:56585161:56590916    | 56587670  | s | NM_018261    | 9  | CDS  | 55763  | SEC3L1      | SEC3-like 1 (S. cerevisiae)                                                                  |
| Hs.269977.1.9  | chr2:98303314:98305030    | 98303942  | s | NM_144992    | 16 | CDS  | 200403 | MGC26733    | hypothetical protein MGC26733                                                                |
| Hs.271224.1.2  | chr3:49003352:49013874    | 49012219  | s | NM_017732    | 2  | CDS  | 54681  | PH-4        | hypoxia-inducible factor prolyl 4-hydroxylase                                                |
| Hs.271896.1.4  | chr14:50425372:50438296   | 50430038  | s | NM_181533    | 8  | CDS  | 145447 | C14orf29    | chromosome 14 open reading frame 29                                                          |
| Hs.274539.1.23 | chr3:198761541:198748743  | 198753880 | s | NM_004051    | 2  | CDS  | 622    | BDH         | 3-hydroxybutyrate dehydrogenase (heart, mitochondrial)                                       |
| Hs.276252.1.32 | chr20:3532910:3553157     | 3544711   | s | NM_139321    | 24 | CDS  | 8455   | ATRN        | attractin                                                                                    |
| Hs.276252.1.33 | chr20:3553220:3562957     | 3557941   | s | NM_139321    | 25 | CDS  | 8455   | ATRN        | attractin                                                                                    |
| Hs.27695.1.13  | chrX:10247472:10237584    | 10246841  | s | NM_000381    | 7  | CDS  | 4281   | MID1        | midline 1 (Opitz/BBB syndrome)                                                               |
| Hs.279522.1.4  | chr9:99675292:99686485    | 99678902  | s | NM_006981    | 5  | CDS  | 8013   | NR4A3       | nuclear receptor subfamily 4, group A, member 3                                              |
| Hs.279562.1.4  | chr20:62291958:62300658   | 62293681  | s | NM_004535    | 2  | 5UTR | 4661   | MYT1        | myelin transcription factor 1                                                                |
| Hs.280741.1.7  | chr19:43489907:43487988   | 43489329  | s | NM_033557    | 6  | CDS  | 90522  | YIF1B       | Yip1 interacting factor homolog B (S. cerevisiae)                                            |
| Hs.282151.1.14 | chr7:81334394:81312203    | 81324303  | s | NM_000722    | 10 | CDS  | 781    | CACNA2D1    | calcium channel, voltage-dependent, alpha 2/delta subunit 1                                  |
| Hs.282331.1.16 | chr6:13709161:13720000    | 13713950  | s | NM_012241    | 9  | CDS  | 23408  | SIRT5       | sirtuin (silent mating type information regulation 2 homolog) 5 (S. cerevisiae)              |
| Hs.282702.1.17 | chr1:203633314:203640693  | 203637309 | s | NM_001018053 | 14 | CDS  | 5208   | PFKFB2      | 6-phosphofructo-2-kinase/fructose-2,6-bisphosphatase 2                                       |
| Hs.282901.1.43 | chr20:33790303:33785594   | 33786149  | s | NM_184237    | 3  | 5UTR | 9584   | RNPC2       | RNA-binding region (RNP1, RRM) containing 2                                                  |
| Hs.28326.1.4   | chr10:101466094:101463227 | 101463264 | s | NM_004376    | 8  | CDS  | 1355   | COX15       | COX15 homolog, cytochrome c oxidase assembly protein (yeast)                                 |
| Hs.284491.1.4  | chr21:43978433:43985975   | 43983168  | s | NM_003681    | 2  | CDS  | 8566   | PDXK        | pyridoxal (pyridoxine, vitamin B6) kinase                                                    |
| Hs.285354.1.10 | chr14:64614383:64613135   | 64613764  | s | NM_002382    | 4  | CDS  | 4149   | MAX         | MYC associated factor X                                                                      |
| Hs.285354.1.15 | chr14:64630178:64614508   | 64620215  | s | NM_002382    | 3  | CDS  | 4149   | MAX         | MYC associated factor X                                                                      |
| Hs.286173.1.16 | chr12:122626031:122627184 | 122626993 | s | NM_020936    | 10 | CDS  | 57696  | DDX55       | DEAD (Asp-Glu-Ala-Asp) box polypeptide 55                                                    |
| Hs.287692.1.4  | chr18:41674205:41676068   | 41675057  | s | NM_213602    | 5  | CDS  | 284266 | CD33L3      | CD33 antigen-like 3                                                                          |
| Hs.287735.1.14 | chr1:151965484:151967400  | 151966165 | s | NM_025058    | 8  | CDS  | 80128  | TRIM46      | tripartite motif-containing 46                                                               |
| Hs.287830.1.16 | chr10:124176538:124179129 | 124178059 | s | NM_001001974 | 11 | CDS  | 59338  | PLEKHA1     | pleckstrin homology domain containing, family A (phosphoinositide binding specific) member 1 |
| Hs.288772.1.34 | chr11:112744396:112749055 | 112747473 | s | NM_017868    | 21 | 3UTR | 54970  | TTC12       | tetratricopeptide repeat domain 12                                                           |
| Hs.291235.1.9  | chr1:54365345:54361960    | 54363847  | s | NM_201546    | 4  | 5UTR | 200008 | LOC200008   | hypothetical protein LOC200008                                                               |
| Hs.291587.1.25 | chr6:157597683:157602888  | 157599867 | s | NM_017519    | 13 | CDS  | 57492  | ARID1B      | AT rich interactive domain 1B (SWI1-like)                                                    |
| Hs.292056.1.7  | chr4:2304662:2289230      | 2299211   | s | NM_020972    | 6  | CDS  | 57732  | ZFYVE28     | zinc finger, FYVE domain containing 28                                                       |
| Hs.292580.1.3  | chr14:49528723:49518773   | 49528029  | s | NM_001012706 | 3  | 3UTR | 283551 | LOC283551   | hypothetical protein LOC283551                                                               |
| Hs.293689.1.8  | chr2:47046599:47044385    | 47044607  | s | NM_139279    | 3  | CDS  | 90411  | MCFD2       | multiple coagulation factor deficiency 2                                                     |
| Hs.294147.1.28 | chr9:137717118:137714105  | 137715927 | s | NM_152286    | 3  | CDS  | 375775 | C9orf111    | chromosome 9 open reading frame 111                                                          |
| Hs.29700.1.13  | chr5:132386431:132370512  | 132382631 | s | BC022443     | 2  | CDS  | 54819  | ZCCHC10     | zinc finger, CCHC domain containing 10                                                       |
| Hs.298198.1.6  | chr16:65201408:65204012   | 65202465  | s | NM_144601    | 5  | CDS  | 123920 | CKLFSF3     | chemokine-like factor super family 3                                                         |
| Hs.301048.1.22 | chr18:12974190:12976860   | 12975494  | s | NM_001013437 | 8  | CDS  | 81929  | SEH1L       | SEH1-like (S. cerevisiae)                                                                    |

|                |                           |           |   |              |    |      |        |              |                                                                                                        |
|----------------|---------------------------|-----------|---|--------------|----|------|--------|--------------|--------------------------------------------------------------------------------------------------------|
| Hs.30141.1.8   | chr15:29026624:29022568   | 29025705  | s | BC063296     | 13 | 3UTR | 54893  | MTMR10       | myotubularin related protein 10                                                                        |
| Hs.302037.1.11 | chr6:30133870:30111740    | 30130357  | s | AK126001     | 2  | 5UTR | 80862  | C6orf12      | chromosome 6 open reading frame 12                                                                     |
| Hs.302714.1.3  | chr10:62843222:62840511   | 62842657  | s | NM_178505    | 5  | CDS  | 219623 | TMEM26       | transmembrane protein 26                                                                               |
| Hs.303025.1.16 | chr11:67792097:67787911   | 67791145  | s | NM_022338    | 2  | 5UTR | 53838  | C11orf24     | chromosome 11 open reading frame 24                                                                    |
| Hs.303154.1.18 | chrX:148277603:148274389  | 148274428 | s | NM_000202    | 9  | CDS  | 3423   | IDS          | iduronate 2-sulfatase (Hunter syndrome)                                                                |
| Hs.303154.1.20 | chrX:148277603:148274389  | 148274547 | s | NM_000202    | 9  | CDS  | 3423   | IDS          | iduronate 2-sulfatase (Hunter syndrome)                                                                |
| Hs.303197.1.2  | chr16:30807681:30753971   | 30770068  | s | BC058863     | 5  | CDS  | 9274   | BCL7C        | B-cell CLL/lymphoma 7C                                                                                 |
| Hs.303787.1.22 | chr7:106848129:106852723  | 106850961 | s | NM_001008405 | 8  | CDS  | 55973  | BCAP29       | B-cell receptor-associated protein 29                                                                  |
| Hs.303787.1.30 | chr7:106847829:106863217  | 106853055 | s | NM_001008407 | 7  | CDS  | 55973  | BCAP29       | B-cell receptor-associated protein 29                                                                  |
| Hs.303787.1.36 | chr7:106847829:106863217  | 106854868 | s | NM_001008407 | 7  | CDS  | 55973  | BCAP29       | B-cell receptor-associated protein 29                                                                  |
| Hs.303787.1.41 | chr7:106847829:106863217  | 106856266 | s | NM_001008407 | 7  | CDS  | 55973  | BCAP29       | B-cell receptor-associated protein 29                                                                  |
| Hs.303787.1.43 | chr7:106847829:106863217  | 106857711 | s | NM_001008407 | 7  | CDS  | 55973  | BCAP29       | B-cell receptor-associated protein 29                                                                  |
| Hs.303820.1.6  | chr4:15158721:15180320    | 15160152  | s | AB037766     | 2  | CDS  | 57545  | KIAA1345     | KIAA1345 protein                                                                                       |
| Hs.30385.1.6   | chr10:21867848:21915228   | 21886117  | s | NM_001009569 | 2  | CDS  | 8028   | MLLT10       | myeloid/lymphoid or mixed-lineage leukemia (trithorax homolog, Drosophila); translocated to, 10        |
| Hs.30561.1.28  | chr8:95539671:95492720    | 95513350  | s | NM_012415    | 3  | CDS  | 25788  | RAD54B       | RAD54 homolog B (S. cerevisiae)                                                                        |
| Hs.306230.1.10 | chr19:59447728:59446609   | 59447440  | s | NM_006840    | 12 | CDS  | 10990  | LILRB5       | leukocyte immunoglobulin-like receptor, subfamily B (with TM and ITIM domains), member 5               |
| Hs.306242.1.33 | chr6:13766990:13765488    | 13765629  | s | NM_005493    | 3  | CDS  | 10048  | RANBP9       | RAN binding protein 9                                                                                  |
| Hs.306809.1.17 | chr19:16489153:16491904   | 16490430  | s | NM_032207    | 8  | 3UTR | 84167  | FLJ21742     | hypothetical protein FLJ21742                                                                          |
| Hs.307835.1.7  | chr9:68309679:68323887    | 68311025  | s | NM_021965    | 7  | CDS  | 5239   | PGM5         | phosphoglucomutase 5                                                                                   |
| Hs.308122.1.11 | chr14:92482428:92474625   | 92477505  | s | BC003622     | 10 | CDS  | 3705   | ITPK1        | inositol 1,3,4-triphosphate 5/6 kinase                                                                 |
| Hs.309288.1.4  | chr10:11299477:11331121   | 11300331  | s | NM_006561    | 3  | CDS  | 10659  | CUGBP2       | CUG triplet repeat, RNA binding protein 2                                                              |
| Hs.309489.1.11 | chr8:99303882:99293906    | 99298599  | s | NM_024759    | 5  | CDS  | 79815  | NPAL2        | NIPA-like domain containing 2                                                                          |
| Hs.309849.1.12 | chr14:90703476:90706099   | 90703818  | s | NM_024952    | 4  | CDS  | 80017  | C14orf159    | chromosome 14 open reading frame 159                                                                   |
| Hs.310429.1.47 | chr14:50329179:50315273   | 50328514  | s | NM_016350    | 4  | CDS  | 51199  | NIN          | ninein (GSK3B interacting protein)                                                                     |
| Hs.310536.1.14 | chrX:71491803:71467603    | 71476287  | s | NM_018486    | 7  | CDS  | 55869  | HDAC8        | histone deacetylase 8                                                                                  |
| Hs.310536.1.30 | chrX:71570759:71498140    | 71565093  | s | NM_018486    | 4  | CDS  | 55869  | HDAC8        | histone deacetylase 8                                                                                  |
| Hs.310537.1.24 | chr20:8718909:8810268     | 8721437   | s | NM_015192    | 31 | CDS  | 23236  | PLCB1        | phospholipase C, beta 1 (phosphoinositide-specific)                                                    |
| Hs.31082.1.14  | chr4:41792331:41797014    | 41796966  | s | NM_018126    | 6  | CDS  | 55161  | TMEM33       | transmembrane protein 33                                                                               |
| Hs.318547.1.22 | chr11:48108845:48114166   | 48109758  | s | NM_002843    | 8  | CDS  | 5795   | PTPRJ        | protein tyrosine phosphatase, receptor type, J                                                         |
| Hs.3192.1.3    | chr10:72314914:72312249   | 72313756  | s | NM_001001939 | 3  | CDS  | 5092   | PCBD1        | 6-pyruvoyl-tetrahydropterin synthase/dimerization cofactor of hepatocyte nuclear factor 1 alpha (TCF1) |
| Hs.32099.1.16  | chr8:38295569:38292718    | 38294004  | s | NM_023034    | 9  | CDS  | 54904  | WHSC1L1      | Wolf-Hirschhorn syndrome candidate 1-like 1                                                            |
| Hs.322473.1.3  | chr19:8295332:8293807     | 8294199   | s | NM_198471    | 10 | CDS  | 256949 | ANKRD47      | ankyrin repeat domain 47                                                                               |
| Hs.323562.1.18 | chrX:76932449:76919140    | 76929750  | s | NM_032121    | 3  | CDS  | 84061  | DKFZp564K142 | implantation-associated protein                                                                        |
| Hs.325528.1.17 | chr5:169200435:169342649  | 169235459 | s | NM_004946    | 27 | CDS  | 1794   | DOCK2        | dedicator of cytokinesis 2                                                                             |
| Hs.325528.1.18 | chr5:169200435:169342649  | 169294453 | s | NM_004946    | 27 | CDS  | 1794   | DOCK2        | dedicator of cytokinesis 2                                                                             |
| Hs.32567.1.6   | chr5:69358099:69373106    | 69364279  | s | NM_021967    | 2  | CDS  | 8293   | SERF1A       | small EDRK-rich factor 1A (telomeric)                                                                  |
| Hs.32826.1.12  | chr6:125663382:125655755  | 125661567 | s | BC001671     | 2  | CDS  | 51020  | C6orf74      | chromosome 6 open reading frame 74                                                                     |
| Hs.331141.1.30 | chr12:110649870:110654295 | 110651778 | s | NM_025247    | 18 | CDS  | 80724  | ACAD10       | acyl-Coenzyme A dehydrogenase family, member 10                                                        |
| Hs.332422.1.41 | chr8:62708795:62694133    | 62701180  | s | NM_004318    | 14 | CDS  | 444    | ASPH         | aspartate beta-hydroxylase                                                                             |
| Hs.332422.1.42 | chr8:62708795:62694133    | 62701228  | s | NM_004318    | 14 | CDS  | 444    | ASPH         | aspartate beta-hydroxylase                                                                             |
| Hs.332422.1.58 | chr8:62756080:62728774    | 62736786  | s | NM_004318    | 4  | CDS  | 444    | ASPH         | aspartate beta-hydroxylase                                                                             |
| Hs.332706.1.16 | chr10:13204494:13206000   | 13205204  | s | NM_001008211 | 9  | CDS  | 10133  | OPTN         | optineurin                                                                                             |
| Hs.333181.1.3  | chr3:184691857:184691102  | 184691500 | s | NM_130446    | 7  | 3UTR | 89857  | KLHL6        | kelch-like 6 (Drosophila)                                                                              |
| Hs.33368.1.8   | chr15:92746253:92784408   | 92747498  | s | NM_018349    | 16 | CDS  | 55784  | MCTP2        | multiple C2-domains with two transmembrane regions 2                                                   |



|                |                           |           |   |              |    |      |        |          |                                                                                                  |
|----------------|---------------------------|-----------|---|--------------|----|------|--------|----------|--------------------------------------------------------------------------------------------------|
| Hs.334306.1.20 | chr12:8918876:8924386     | 8920634   | s | NM_144670    | 6  | 3UTR | 144568 | CPAMD9   | C3 and PZP-like, alpha-2-macroglobulin domain containing 9                                       |
| Hs.334587.1.12 | chr8:30521684:30535945    | 30524575  | s | NM_001008710 | 6  | CDS  | 11030  | RBPMS    | RNA binding protein with multiple splicing                                                       |
| Hs.334637.1.2  | chr12:109550692:109528702 | 109549308 | s | AY359054     | 7  | CDS  | 84329  | MGC15619 | hypothetical protein MGC15619                                                                    |
| Hs.334772.1.19 | chr4:84760485:84755012    | 84757142  | s | NM_139076    | 2  | 5UTR | 84142  | FLJ13614 | hypothetical protein FLJ13614                                                                    |
| Hs.334846.1.9  | chr11:119051078:119041218 | 119050309 | s | NM_002855    | 5  | CDS  | 5818   | PVRL1    | poliovirus receptor-related 1 (herpesvirus entry mediator C; nectin)                             |
| Hs.335003.1.40 | chr16:87899114:87885093   | 87892784  | s | NM_013275    | 4  | CDS  | 29123  | ANKRD11  | ankyrin repeat domain 11                                                                         |
| Hs.335003.1.51 | chr16:88012192:87910988   | 87955435  | s | NM_013275    | 2  | 5UTR | 29123  | ANKRD11  | ankyrin repeat domain 11                                                                         |
| Hs.335034.1.31 | chr1:97899086:97877125    | 97898052  | s | NM_000110    | 5  | CDS  | 1806   | DPYD     | dihydropyrimidine dehydrogenase                                                                  |
| Hs.335205.1.13 | chr17:25027963:25023274   | 25025058  | s | NM_033389    | 7  | CDS  | 85464  | SSH2     | slingshot homolog 2 (Drosophila)                                                                 |
| Hs.335513.1.20 | chr6:6167264:6142559      | 6151643   | s | NM_000129    | 8  | CDS  | 2162   | F13A1    | coagulation factor XIII, A1 polypeptide                                                          |
| Hs.336994.1.26 | chr8:125780947:125672658  | 125779458 | s | NM_014751    | 3  | CDS  | 9788   | MTSS1    | metastasis suppressor 1                                                                          |
| Hs.337667.1.3  | chr22:37763596:37765445   | 37764928  | s | NM_145298    | 2  | CDS  | 200316 | APOBEC3F | apolipoprotein B mRNA editing enzyme, catalytic polypeptide-like 3F                              |
| Hs.338851.1.11 | chr3:190415875:190439223  | 190420156 | s | NM_198485    | 3  | CDS  | 285386 | FAM79B   | family with sequence similarity 79, member B                                                     |
| Hs.338851.1.13 | chr3:190415875:190439223  | 190420360 | s | NM_198485    | 3  | CDS  | 285386 | FAM79B   | family with sequence similarity 79, member B                                                     |
| Hs.338851.1.15 | chr3:190511031:190521116  | 190516184 | s | NM_198485    | 5  | CDS  | 285386 | FAM79B   | family with sequence similarity 79, member B                                                     |
| Hs.339396.1.5  | chr22:37270429:37259918   | 37266271  | s | NM_007068    | 8  | CDS  | 11144  | DMC1     | DMC1 dosage suppressor of mck1 homolog, meiosis-specific homologous recombination (yeast)        |
| Hs.339735.1.15 | chr13:112931835:112935491 | 112932529 | s | NM_001008895 | 5  | CDS  | 8451   | CUL4A    | cullin 4A                                                                                        |
| Hs.34024.1.36  | chr3:172570110:172428713  | 172547425 | s | NM_015028    | 2  | CDS  | 23043  | TNIK     | TRAF2 and NCK interacting kinase                                                                 |
| Hs.340636.1.20 | chr20:60207709:60209133   | 60208717  | s | NM_015666    | 5  | CDS  | 26164  | GTPBP5   | GTP binding protein 5 (putative)                                                                 |
| Hs.343244.1.21 | chr14:23102428:23101643   | 23102145  | s | NM_003917    | 14 | CDS  | 8906   | AP1G2    | adaptor-related protein complex 1, gamma 2 subunit                                               |
| Hs.343627.1.13 | chr16:85132803:85123589   | 85131827  | s | NM_022764    | 7  | CDS  | 64779  | FLJ12998 | hypothetical protein FLJ12998                                                                    |
| Hs.343627.1.15 | chr16:85132803:85123589   | 85132152  | s | NM_022764    | 7  | CDS  | 64779  | FLJ12998 | hypothetical protein FLJ12998                                                                    |
| Hs.34421.1.13  | chr5:153763965:153769293  | 153765992 | s | NM_017540    | 1  | CDS  | 55568  | GALNT10  | UDP-N-acetyl-alpha-D-galactosamine:polypeptide N-acetylgalactosaminyltransferase 10 (GalNAc-T10) |
| Hs.347187.1.8  | chrX:149571771:149575634  | 149574724 | s | NM_003828    | 9  | CDS  | 8776   | MTMR1    | myotubularin related protein 1                                                                   |
| Hs.348387.1.24 | chr1:109913775:109919674  | 109916366 | s | NM_147148    | 7  | CDS  | 2948   | GSTM4    | glutathione S-transferase M4                                                                     |
| Hs.348615.1.2  | chr10:114051882:114053010 | 114052228 | s | NM_058222    | 9  | CDS  | 6975   | TECTB    | tectorin beta                                                                                    |
| Hs.34871.1.34  | chr2:145108576:145021326  | 145102688 | s | NM_014795    | 2  | CDS  | 9839   | ZFX1B    | zinc finger homeobox 1b                                                                          |
| Hs.348711.1.10 | chr2:202570397:202581013  | 202579681 | s | NM_139158    | 12 | CDS  | 65061  | ALS2CR7  | amyotrophic lateral sclerosis 2 (juvenile) chromosome region, candidate 7                        |
| Hs.350756.1.39 | chr8:74747895:74692241    | 74727054  | s | NM_014393    | 5  | CDS  | 27067  | STAU2    | staufen, RNA binding protein, homolog 2 (Drosophila)                                             |
| Hs.350899.1.37 | chr1:220266677:220269270  | 220267147 | s | NM_001748    | 19 | CDS  | 824    | CAPN2    | calpain 2, (m/II) large subunit                                                                  |
| Hs.351099.1.11 | chr19:46631281:46630154   | 46630824  | s | CR602095     | 3  | CDS  | 55101  | FLJ10241 | hypothetical protein FLJ10241                                                                    |
| Hs.351344.1.20 | chr11:117910281:117922043 | 117911755 | s | AK027305     | 8  | CDS  | 84866  | TMEM25   | transmembrane protein 25                                                                         |
| Hs.351798.1.6  | chrX:105897679:105899399  | 105899116 | s | NM_017752    | 11 | CDS  | 54885  | FLJ20298 | FLJ20298 protein                                                                                 |
| Hs.351798.1.7  | chrX:105897679:105899399  | 105899208 | s | NM_017752    | 11 | CDS  | 54885  | FLJ20298 | FLJ20298 protein                                                                                 |
| Hs.352240.1.40 | chr17:76869003:76865529   | 76868094  | s | NM_138570    | 6  | CDS  | 124565 | MGC15523 | hypothetical protein MGC15523                                                                    |
| Hs.352671.1.14 | chr21:33889906:33885384   | 33889465  | s | NM_005111    | 11 | CDS  | 9946   | CRYZL1   | crystallin, zeta (quinone reductase)-like 1                                                      |
| Hs.352671.1.16 | chr21:33889906:33885384   | 33889731  | s | NM_005111    | 11 | CDS  | 9946   | CRYZL1   | crystallin, zeta (quinone reductase)-like 1                                                      |
| Hs.352671.1.30 | chr21:33910881:33907783   | 33910463  | s | NM_005111    | 5  | CDS  | 9946   | CRYZL1   | crystallin, zeta (quinone reductase)-like 1                                                      |
| Hs.353454.1.18 | chr1:32510955:32503245    | 32510204  | s | NM_018045    | 8  | CDS  | 55108  | BSDC1    | BSD domain containing 1                                                                          |
| Hs.354013.1.15 | chr8:92475444:92476465    | 92475796  | s | NM_052832    | 18 | CDS  | 115111 | SLC26A7  | solute carrier family 26, member 7                                                               |
| Hs.355888.1.30 | chr15:38381449:38378722   | 38380162  | s | NM_004573    | 7  | CDS  | 5330   | PLCB2    | phospholipase C, beta 2                                                                          |
| Hs.355888.1.33 | chr15:38381449:38378722   | 38380923  | s | NM_004573    | 7  | CDS  | 5330   | PLCB2    | phospholipase C, beta 2                                                                          |
| Hs.355935.1.1  | chr14:22369304:22373220   | 22372510  | s | NM_181307    | 3  | CDS  | 122704 | MRPL52   | mitochondrial ribosomal protein L52                                                              |

|                |                           |           |   |              |    |      |        |               |                                                                          |
|----------------|---------------------------|-----------|---|--------------|----|------|--------|---------------|--------------------------------------------------------------------------|
| Hs.356399.1.1  | chr1:207821902:207832968  | 207822939 | s | NM_018254    | 1  | CDS  | 55758  | RCOR3         | REST corepressor 3                                                       |
| Hs.357128.1.3  | chr6:39985556:39980017    | 39981072  | s | BC036839     | 9  | CDS  | 4337   | MOCS1         | molybdenum cofactor synthesis 1                                          |
| Hs.357567.1.2  | chr2:149842858:149887274  | 149869657 | s | NM_177964    | 3  | CDS  | 130576 | LOC130576     | hypothetical protein LOC130576                                           |
| Hs.357637.1.20 | chr1:101066329:101055481  | 101063175 | s | NM_001439    | 2  | CDS  | 2135   | EXTL2         | exostoses (multiple)-like 2                                              |
| Hs.359698.1.11 | chr7:50337256:50321771    | 50334554  | s | NM_000790    | 9  | CDS  | 1644   | DDC           | dopa decarboxylase (aromatic L-amino acid decarboxylase)                 |
| Hs.363396.1.31 | chr1:193391027:193414521  | 193402352 | s | NM_000186    | 9  | CDS  | 3075   | CFH           | complement factor H                                                      |
| Hs.367639.1.3  | chr4:106469267:106512657  | 106481307 | s | NM_017628    | 2  | 5UTR | 54790  | FLJ20032      | hypothetical protein FLJ20032                                            |
| Hs.367900.1.15 | chr6:170805576:170804438  | 170805209 | s | NM_002598    | 5  | CDS  | 5134   | PDCD2         | programmed cell death 2                                                  |
| Hs.367900.1.21 | chr6:170809776:170806826  | 170808468 | s | NM_002598    | 3  | CDS  | 5134   | PDCD2         | programmed cell death 2                                                  |
| Hs.367992.1.9  | chr18:12004373:12018041   | 12008284  | s | NM_014214    | 5  | CDS  | 3613   | IMPA2         | inositol(myo)-1(or 4)-monophosphatase 2                                  |
| Hs.368022.1.10 | chr4:186699796:186696782  | 186698573 | s | NM_018359    | 11 | CDS  | 55325  | FLJ11200      | hypothetical protein FLJ11200                                            |
| Hs.368077.1.9  | chr18:59803460:59805087   | 59804867  | s | NM_002640    | 6  | CDS  | 5271   | SERPINB8      | serine (or cysteine) proteinase inhibitor, clade B (ovalbumin), member 8 |
| Hs.368084.1.60 | chr2:44099330:44096242    | 44097776  | s | NM_133259    | 13 | CDS  | 10128  | LRPPRC        | leucine-rich PPR-motif containing                                        |
| Hs.368131.1.22 | chr7:116456068:116463766  | 116457909 | s | NM_018412    | 14 | CDS  | 7982   | ST7           | suppression of tumorigenicity 7                                          |
| Hs.368171.1.12 | chr2:73127041:73110470    | 73111965  | s | NM_144579    | 10 | CDS  | 94097  | SFXN5         | sideroflexin 5                                                           |
| Hs.368254.1.13 | chr3_random:63015:68139   | 68130     | s | NM_000187    | 12 | CDS  | 3081   | HGD           | homogentisate 1,2-dioxygenase (homogentisate oxidase)                    |
| Hs.368281.1.18 | chr2:210371058:210390506  | 210385582 | s | NM_031845    | 6  | CDS  | 4133   | MAP2          | microtubule-associated protein 2                                         |
| Hs.368305.1.3  | chr4:80193542:80184495    | 80190211  | s | BC031256     | 10 | 3UTR | 152559 | PAQR3         | progesterin and adipoQ receptor family member III                        |
| Hs.368375.1.3  | chr19:39950060:39943305   | 39945619  | s | NM_001007247 | 4  | CDS  | 148103 | ZNF599        | zinc finger protein 599                                                  |
| Hs.368527.1.25 | chr11:1287271:1273601     | 1275952   | s | NM_019009    | 1  | CDS  | 54472  | TOLLIP        | toll interacting protein                                                 |
| Hs.368563.1.64 | chr3:185214753:185189874  | 185201153 | s | NM_001023587 | 2  | CDS  | 10057  | ABCC5         | ATP-binding cassette, sub-family C (CFTR/MRP), member 5                  |
| Hs.368587.1.7  | chr5:35104074:35085271    | 35099991  | s | AF416618     | 7  | CDS  | 5618   | PRLR          | prolactin receptor                                                       |
| Hs.368783.1.8  | chr20:19955564:19961745   | 19961197  | s | NM_181528    | 4  | CDS  | 51126  | NAT5          | N-acetyltransferase 5 (ARD1 homolog, S. cerevisiae)                      |
| Hs.368935.1.2  | chr17:18804691:18813089   | 18806228  | s | NM_152351    | 5  | CDS  | 125206 | SLC5A10       | solute carrier family 5 (sodium/glucose cotransporter), member 10        |
| Hs.369056.1.36 | chr2:231201387:231229486  | 231206747 | s | AF255565     | 24 | CDS  | 6672   | SP100         | nuclear antigen Sp100                                                    |
| Hs.369168.1.18 | chr14:30192546:30209212   | 30197314  | s | NM_016106    | 10 | CDS  | 23256  | SCFD1         | sec1 family domain containing 1                                          |
| Hs.369385.1.12 | chr1:26458294:26468423    | 26459198  | s | NM_024887    | 6  | CDS  | 79947  | DHDDS         | dehydrodolichyl diphosphate synthase                                     |
| Hs.369438.1.26 | chr11:127931395:127865682 | 127911517 | s | BX640634     | 3  | CDS  | 2113   | ETS1          | v-ets erythroblastosis virus E26 oncogene homolog 1 (avian)              |
| Hs.369448.1.11 | chr4:79597320:79611604    | 79597986  | s | NM_020875    | 17 | CDS  | 80144  | FRAS1         | Fraser syndrome 1                                                        |
| Hs.369607.1.64 | chr4:881650:880168        | 880204    | s | NM_005255    | 6  | CDS  | 2580   | GAK           | cyclin G associated kinase                                               |
| Hs.369682.1.33 | chr22:43928373:43922331   | 43927752  | s | NM_001009880 | 2  | CDS  | 23313  | C22orf9       | chromosome 22 open reading frame 9                                       |
| Hs.369819.1.17 | chr17:75533301:75530601   | 75532252  | s | NM_019020    | 10 | CDS  | 125058 | TBC1D16       | TBC1 domain family, member 16                                            |
| Hs.370247.1.9  | chr11:129485767:129501804 | 129496844 | s | BC004371     | 3  | CDS  | 334    | APLP2         | amyloid beta (A4) precursor-like protein 2                               |
| Hs.370262.1.15 | chr17:70327578:70346620   | 70346211  | s | AK000262     | 9  | CDS  | 54868  | FLJ20255      | hypothetical protein FLJ20255                                            |
| Hs.370365.1.4  | chr10:70725443:70773588   | 70726253  | s | NM_033497    | 4  | CDS  | 3098   | HK1           | hexokinase 1                                                             |
| Hs.370421.1.7  | chr11:76573409:76578036   | 76573689  | s | NM_000260    | 27 | CDS  | 4647   | MYO7A         | myosin VIIA (Usher syndrome 1B (autosomal recessive, severe))            |
| Hs.370498.1.3  | chr2:178013473:178001564  | 178011847 | s | NM_182585    | 6  | 5UTR | 285023 | DKFZp451M2119 | hypothetical protein DKFZp451M2119                                       |
| Hs.370605.1.21 | chr1:229577493:229508143  | 229538138 | s | NM_024938    | 16 | 3UTR | 80003  | PCNXL2        | pecanex-like 2 (Drosophila)                                              |
| Hs.370725.1.44 | chr18:20200853:20175621   | 20191087  | s | NM_080597    | 4  | CDS  | 114876 | OSBPL1A       | oxysterol binding protein-like 1A                                        |
| Hs.370931.1.2  | chr8:143354048:143308848  | 143349753 | s | NM_145003    | 12 | CDS  | 203062 | FLJ31164      | hypothetical protein FLJ31164                                            |
| Hs.370984.1.11 | chr19:48821069:48820235   | 48820827  | s | NM_145296    | 7  | CDS  | 199731 | IGSF4C        | immunoglobulin superfamily, member 4C                                    |
| Hs.371013.1.28 | chr19:5089082:5094977     | 5092514   | s | NM_015015    | 18 | CDS  | 23030  | JMJD2B        | jumonji domain containing 2B                                             |
| Hs.371036.1.14 | chr11:88863273:88824712   | 88861669  | s | NM_016931    | 2  | CDS  | 50507  | NOX4          | NADPH oxidase 4                                                          |
| Hs.371240.1.7  | chr6:151719153:151761959  | 151738041 | s | NM_005100    | 2  | CDS  | 9590   | AKAP12        | A kinase (PRKA) anchor protein (gravin) 12                               |
| Hs.37138.1.3   | chr19:20909694:20923389   | 20918623  | s | NM_003429    | 3  | CDS  | 7639   | ZNF85         | zinc finger protein 85 (HPF4, HTF1)                                      |

|                |                           |           |   |           |    |      |        |          |                                                                                                                            |
|----------------|---------------------------|-----------|---|-----------|----|------|--------|----------|----------------------------------------------------------------------------------------------------------------------------|
| Hs.371903.1.9  | chr4:145155503:145151011  | 145154073 | s | NM_198682 | 3  | 3UTR | 2996   | GYPE     | glycophorin E                                                                                                              |
| Hs.372123.1.17 | chr17:8304204:8310972     | 8305412   | s | NM_030808 | 8  | CDS  | 81565  | NDEL1    | nudE nuclear distribution gene E homolog like 1 (A. nidulans)                                                              |
| Hs.372360.1.10 | chr7:33086809:33149292    | 33127423  | s | NM_014451 | 9  | CDS  | 27241  | B1       | parathyroid hormone-responsive B1 gene                                                                                     |
| Hs.373741.1.28 | chr20:29613201:29617673   | 29614135  | s | NM_030789 | 10 | CDS  | 81502  | HM13     | histocompatibility (minor) 13                                                                                              |
| Hs.374043.1.4  | chr20:30423339:30479591   | 30424017  | s | BC064984  | 4  | 3UTR | 171023 | ASXL1    | additional sex combs like 1 (Drosophila)                                                                                   |
| Hs.374067.1.16 | chr12:108390530:108391569 | 108391164 | s | NM_130466 | 8  | CDS  | 89910  | UBE3B    | ubiquitin protein ligase E3B                                                                                               |
| Hs.374067.1.17 | chr12:108390530:108391569 | 108391247 | s | NM_130466 | 8  | CDS  | 89910  | UBE3B    | ubiquitin protein ligase E3B                                                                                               |
| Hs.374262.1.21 | chr9:131982382:131919409  | 131978292 | s | NM_004269 | 2  | CDS  | 9442   | CRSP8    | cofactor required for Sp1 transcriptional activation, subunit 8, 34kDa                                                     |
| Hs.374477.1.21 | chr22:28009330:28012107   | 28011227  | s | BC011048  | 7  | CDS  | 2130   | EWSR1    | Ewing sarcoma breakpoint region 1                                                                                          |
| Hs.375957.1.40 | chr21:45154626:45151439   | 45152330  | s | NM_000211 | 3  | CDS  | 3689   | ITGB2    | integrin, beta 2 (antigen CD18 (p95), lymphocyte function-associated antigen 1; macrophage antigen 1 (mac-1) beta subunit) |
| Hs.376617.1.3  | chr7:1249618:1241669      | 1247244   | s | AK091986  | 2  | 3UTR | 79778  | MICAL-L2 | MICAL-like 2                                                                                                               |
| Hs.37982.1.29  | chr6:11321499:11301912    | 11308592  | s | NM_006403 | 2  | CDS  | 4739   | NEDD9    | neural precursor cell expressed, developmentally down-regulated 9                                                          |
| Hs.37982.1.37  | chr6:11321499:11301912    | 11309144  | s | NM_006403 | 2  | CDS  | 4739   | NEDD9    | neural precursor cell expressed, developmentally down-regulated 9                                                          |
| Hs.380138.1.21 | chr2:175537114:175514754  | 175527348 | s | NM_001822 | 7  | CDS  | 1123   | CHN1     | chimerin (chimaerin) 1                                                                                                     |
| Hs.380277.1.20 | chr9:87502597:87513065    | 87512516  | s | NM_004938 | 18 | CDS  | 1612   | DAPK1    | death-associated protein kinase 1                                                                                          |
| Hs.38032.1.25  | chr3:11443401:11571284    | 11463410  | s | NM_006395 | 17 | CDS  | 10533  | APG7L    | APG7 autophagy 7-like (S. cerevisiae)                                                                                      |
| Hs.38034.1.9   | chr11:125380863:125379182 | 125380498 | s | NM_016952 | 9  | CDS  | 50937  | CDON     | cell adhesion molecule-related/down-regulated by oncogenes                                                                 |
| Hs.382683.1.2  | chr9:101027395:101111716  | 101029863 | s | NM_017753 | 2  | CDS  | 54886  | PRG-3    | plasticity related gene 3                                                                                                  |
| Hs.385861.1.12 | chr7:22938032:22953627    | 22938904  | s | NM_018846 | 5  | CDS  | 55975  | KLHL7    | kelch-like 7 (Drosophila)                                                                                                  |
| Hs.386000.1.3  | chr15:38125563:38144713   | 38136493  | s | AK127696  | 2  | 5UTR | NA     | NA       | NA                                                                                                                         |
| Hs.38621.1.17  | chr10:97104628:97096200   | 97100973  | s | NM_006434 | 14 | CDS  | 10580  | SORBS1   | sorbin and SH3 domain containing 1                                                                                         |
| Hs.386215.1.27 | chr10:51890438:51863323   | 51889707  | s | NM_147156 | 5  | 5UTR | 259230 | TMEM23   | transmembrane protein 23                                                                                                   |
| Hs.386283.1.17 | chr10:127721598:127717989 | 127719905 | s | NM_003474 | 18 | CDS  | 8038   | ADAM12   | a disintegrin and metalloproteinase domain 12 (meltrin alpha)                                                              |
| Hs.386684.1.17 | chr6:135757606:135721019  | 135750615 | s | NM_017651 | 22 | CDS  | 54806  | AHI1     | Abelson helper integration site                                                                                            |
| Hs.387057.1.11 | chr15:69844593:69850456   | 69847044  | s | NM_024817 | 8  | CDS  | 79875  | FLJ13710 | hypothetical protein FLJ13710                                                                                              |
| Hs.387336.1.19 | chr12:98968917:98956290   | 98966154  | s | NM_015054 | 12 | CDS  | 23074  | KIAA0701 | KIAA0701 protein                                                                                                           |
| Hs.387623.1.5  | chr9:94134907:94141651    | 94137683  | s | NM_194320 | 3  | CDS  | 169841 | ZNF169   | zinc finger protein 169                                                                                                    |
| Hs.388841.1.14 | chr7:49898630:49874999    | 49896911  | s | NM_007009 | 3  | CDS  | 11055  | ZBPB     | zona pellucida binding protein                                                                                             |
| Hs.388918.1.14 | chr9:36073560:36077690    | 36076181  | s | NM_021111 | 8  | CDS  | 8434   | RECK     | reversion-inducing-cysteine-rich protein with kazal motifs                                                                 |
| Hs.388918.1.15 | chr9:36073560:36077690    | 36076263  | s | NM_021111 | 8  | CDS  | 8434   | RECK     | reversion-inducing-cysteine-rich protein with kazal motifs                                                                 |
| Hs.389678.1.23 | chr17:76018227:76024527   | 76018766  | s | NM_173627 | 9  | CDS  | 284131 | FLJ35220 | hypothetical protein FLJ35220                                                                                              |
| Hs.389724.1.15 | chr1:78807622:78813042    | 78807893  | s | AL832618  | 2  | 3UTR | 10964  | IFI44L   | interferon-induced protein 44-like                                                                                         |
| Hs.390568.1.15 | chr19:42352580:42339098   | 42348127  | s | BC063820  | 2  | CDS  | 199704 | ZNF585A  | zinc finger protein 585A                                                                                                   |
| Hs.390568.1.6  | chr19:42338606:42333622   | 42333752  | s | BC026081  | 4  | CDS  | 199704 | ZNF585A  | zinc finger protein 585A                                                                                                   |
| Hs.390736.1.14 | chr2:201826337:201830585  | 201826819 | s | NM_003879 | 4  | CDS  | 8837   | CFLAR    | CASP8 and FADD-like apoptosis regulator                                                                                    |
| Hs.390736.1.24 | chr2:201830669:201839982  | 201831727 | s | AF009616  | 5  | CDS  | 8837   | CFLAR    | CASP8 and FADD-like apoptosis regulator                                                                                    |
| Hs.396530.1.16 | chr7:81017319:81003747    | 81016673  | s | NM_000601 | 7  | CDS  | 3082   | HGF      | hepatocyte growth factor (hepapoietin A; scatter factor)                                                                   |
| Hs.397705.1.4  | chr1:6819537:7085629      | 6866285   | s | NM_015215 | 3  | CDS  | 23261  | CAMTA1   | calmodulin binding transcription activator 1                                                                               |
| Hs.397978.1.25 | chr18:17517878:17498190   | 17516859  | s | NM_138340 | 4  | CDS  | 171586 | ABHD3    | abhydrolase domain containing 3                                                                                            |
| Hs.399810.1.8  | chr19:63772455:63766684   | 63770997  | s | NM_003422 | 5  | CDS  | 7593   | ZNF42    | zinc finger protein 42 (myeloid-specific retinoic acid-responsive)                                                         |
| Hs.399891.1.19 | chr6:74559247:74569663    | 74563881  | s | NM_133493 | 23 | CDS  | 135228 | CD109    | CD109 antigen (Gov platelet alloantigens)                                                                                  |
| Hs.401045.1.1  | chr3:44748057:44750692    | 44748761  | s | NM_145044 | 2  | 5UTR | 115560 | ZNF501   | zinc finger protein 501                                                                                                    |

|                |                           |           |   |              |    |      |        |           |                                                                                                 |
|----------------|---------------------------|-----------|---|--------------|----|------|--------|-----------|-------------------------------------------------------------------------------------------------|
| Hs.403150.1.1  | chr12:91641836:91650333   | 91645967  | s | NM_001004330 | 5  | CDS  | 440107 | FLJ46688  | FLJ46688 protein                                                                                |
| Hs.403171.1.32 | chr6:52452545:52462896    | 52455752  | s | NM_018100    | 9  | CDS  | 114327 | EFHC1     | EF-hand domain (C-terminal) containing 1                                                        |
| Hs.403933.1.18 | chr8:124613318:124595755  | 124608420 | s | NM_058229    | 4  | CDS  | 114907 | FBXO32    | F-box protein 32                                                                                |
| Hs.404000.1.17 | chr4:130322154:130317857  | 130317953 | s | NM_144643    | 4  | CDS  | 132320 | FLJ30655  | hypothetical protein FLJ30655                                                                   |
| Hs.404089.1.15 | chr10:104367176:104376921 | 104369210 | s | NM_016169    | 10 | CDS  | 51684  | SUFU      | suppressor of fused homolog (Drosophila)                                                        |
| Hs.404102.1.12 | chr7:20471540:20494367    | 20473257  | s | NM_178559    | 5  | CDS  | 340273 | ABCB5     | ATP-binding cassette, sub-family B (MDR/TAP), member 5                                          |
| Hs.404137.1.9  | chr18:42857831:42879611   | 42879318  | s | NM_031303    | 12 | CDS  | 83473  | KATNAL2   | katanin p60 subunit A-like 2                                                                    |
| Hs.404706.1.10 | chrX:133641370:133630905  | 133631447 | s | AK124940     | 8  | CDS  | 159090 | LOC159090 | similar to hypothetical protein MGC17347                                                        |
| Hs.404706.1.7  | chrX:133641370:133630905  | 133631187 | s | AK124940     | 8  | CDS  | 159090 | LOC159090 | similar to hypothetical protein MGC17347                                                        |
| Hs.404914.1.16 | chr2:9626560:9618682      | 9620215   | s | NM_003183    | 4  | CDS  | 6868   | ADAM17    | a disintegrin and metalloproteinase domain 17 (tumor necrosis factor, alpha, converting enzyme) |
| Hs.405610.1.13 | chr18:46053044:46050187   | 46051416  | s | NM_015845    | 13 | CDS  | 4152   | MBD1      | methyl-CpG binding domain protein 1                                                             |
| Hs.405619.1.21 | chr10:25266118:25200999   | 25237236  | s | NM_020200    | 3  | CDS  | 56952  | PRTFDC1   | phosphoribosyl transferase domain containing 1                                                  |
| Hs.405667.1.3  | chr2:86983702:86961156    | 86980367  | s | NM_172101    | 5  | CDS  | 926    | CD8B1     | CD8 antigen, beta polypeptide 1 (p37)                                                           |
| Hs.406135.1.8  | chr22:49513866:49527226   | 49517745  | s | NM_203302    | 2  | 5UTR | 284942 | MGC70863  | similar to RPL23AP7 protein                                                                     |
| Hs.406156.1.47 | chr1:62764198:62760947    | 62761797  | s | NM_033407    | 15 | CDS  | 85440  | DOCK7     | dedicator of cytokinesis 7                                                                      |
| Hs.406234.1.6  | chr15:39350109:39358256   | 39351864  | s | NM_007236    | 5  | CDS  | 11261  | CHP       | calcium binding protein P22                                                                     |
| Hs.406758.1.12 | chr7:27355825:27351277    | 27352740  | s | NM_152740    | 5  | CDS  | 11112  | HIBADH    | 3-hydroxyisobutyrate dehydrogenase                                                              |
| Hs.407162.2.1  | chr19:19888465:19904990   | 19904747  | s | AK096342     | 3  | CDS  | NA     | NA        | NA                                                                                              |
| Hs.407162.2.2  | chr19:19888465:19904990   | 19904806  | s | AK096342     | 3  | CDS  | NA     | NA        | NA                                                                                              |
| Hs.408451.1.21 | chr19:8512789:8510913     | 8511203   | s | NM_012335    | 15 | CDS  | 4542   | MYO1F     | myosin IF                                                                                       |
| Hs.408456.1.46 | chr19:5224452:5216208     | 5224075   | s | NM_002850    | 3  | CDS  | 5802   | PTPRS     | protein tyrosine phosphatase, receptor type, S                                                  |
| Hs.408528.1.2  | chr13:47779544:47814735   | 47805353  | s | NM_000321    | 2  | CDS  | 5925   | RB1       | retinoblastoma 1 (including osteosarcoma)                                                       |
| Hs.408557.1.8  | chr6:11108305:11103398    | 11107962  | s | NM_017770    | 4  | CDS  | 54898  | ELOVL2    | elongation of very long chain fatty acids (FEN1/Elo2, SUR4/Elo3, yeast)-like 2                  |
| Hs.408658.1.14 | chr8:95966470:95964297    | 95965123  | s | NM_004702    | 7  | CDS  | 9134   | CCNE2     | cyclin E2                                                                                       |
| Hs.408702.1.8  | chr16:56601518:56605677   | 56604960  | s | NM_024598    | 3  | CDS  | 79650  | FLJ13154  | hypothetical protein FLJ13154                                                                   |
| Hs.410810.1.15 | chr5:170388599:170529738  | 170388809 | s | AJ288954     | 15 | 3UTR | 64901  | RANBP17   | RAN binding protein 17                                                                          |
| Hs.410969.1.7  | chr15:86277246:86273670   | 86275312  | s | NM_001012338 | 15 | CDS  | 4916   | NTRK3     | neurotrophic tyrosine kinase, receptor, type 3                                                  |
| Hs.411433.1.27 | chr2:58360727:58343013    | 58352293  | s | NM_018062    | 5  | CDS  | 55120  | FANCL     | Fanconi anemia, complementation group L                                                         |
| Hs.412102.1.2  | chr15:38022979:38028608   | 38026388  | s | NM_001013703 | 3  | CDS  | 440275 | EIF2AK4   | eukaryotic translation initiation factor 2 alpha kinase 4                                       |
| Hs.412939.1.17 | chr4:111477006:111384389  | 111476327 | s | NM_024090    | 1  | CDS  | 79071  | ELOVL6    | ELOVL family member 6, elongation of long chain fatty acids (FEN1/Elo2, SUR4/Elo3-like, yeast)  |
| Hs.413047.1.8  | chr17:70618297:70636366   | 70622513  | s | NM_024585    | 2  | CDS  | 79637  | ARMC7     | armadillo repeat containing 7                                                                   |
| Hs.413482.1.16 | chr21:44384653:44387514   | 44385725  | s | NM_004649    | 5  | CDS  | 8209   | C21orf33  | chromosome 21 open reading frame 33                                                             |
| Hs.413525.1.6  | chr16:79762048:79759208   | 79761395  | s | NM_052892    | 17 | CDS  | 114780 | PKD1L2    | polycystic kidney disease 1-like 2                                                              |
| Hs.415048.1.6  | chr5:179968573:179962997  | 179967359 | s | NM_182925    | 29 | CDS  | 2324   | FLT4      | fms-related tyrosine kinase 4                                                                   |
| Hs.416061.1.11 | chr2:182876124:182858524  | 182873545 | s | NM_001003683 | 14 | CDS  | 5136   | PDE1A     | phosphodiesterase 1A, calmodulin-dependent                                                      |
| Hs.416262.1.4  | chr16:526144:536817       | 529859    | s | NM_005632    | 3  | 5UTR | 6650   | SOLH      | small optic lobes homolog (Drosophila)                                                          |
| Hs.416707.1.31 | chr1:94238113:94234400    | 94237046  | s | NM_000350    | 14 | CDS  | 24     | ABCA4     | ATP-binding cassette, sub-family A (ABC1), member 4                                             |
| Hs.416922.1.7  | chr3:176672249:176776530  | 176688139 | s | NM_207015    | 9  | CDS  | 254827 | NAALADL2  | N-acetylated alpha-linked acidic dipeptidase 2                                                  |
| Hs.417795.1.21 | chr19:40688459:40685629   | 40686048  | s | NM_033317    | 9  | CDS  | 93099  | ZD52F10   | dermokine                                                                                       |
| Hs.418533.1.11 | chr10:124912335:124914552 | 124913399 | s | NM_001007793 | 7  | CDS  | 9184   | BUB3      | BUB3 budding uninhibited by benzimidazoles 3 homolog (yeast)                                    |
| Hs.418533.1.13 | chr10:124912335:124914552 | 124913520 | s | NM_001007793 | 7  | CDS  | 9184   | BUB3      | BUB3 budding uninhibited by benzimidazoles 3 homolog (yeast)                                    |
| Hs.418533.1.15 | chr10:124912335:124914552 | 124913685 | s | NM_001007793 | 7  | CDS  | 9184   | BUB3      | BUB3 budding uninhibited by benzimidazoles 3 homolog (yeast)                                    |

|                |                           |           |   |              |    |      |        |          |                                                                                  |
|----------------|---------------------------|-----------|---|--------------|----|------|--------|----------|----------------------------------------------------------------------------------|
| Hs.419763.1.3  | chr19:21961857:21949450   | 21961370  | s | NM_007153    | 2  | CDS  | 7757   | ZNF208   | zinc finger protein 208                                                          |
| Hs.420036.1.10 | chr2:171518901:171526061  | 171524772 | s | NM_000817    | 6  | CDS  | 2571   | GAD1     | glutamate decarboxylase 1 (brain, 67kDa)                                         |
| Hs.420269.1.53 | chr21:46370884:46376295   | 46374142  | s | NM_001849    | 27 | CDS  | 1292   | COL6A2   | collagen, type VI, alpha 2                                                       |
| Hs.420272.1.16 | chr5:134724085:134716635  | 134723067 | s | NM_004893    | 5  | CDS  | 9555   | H2AFY    | H2A histone family, member Y                                                     |
| Hs.420272.1.20 | chr5:134724085:134716635  | 134723433 | s | NM_004893    | 5  | CDS  | 9555   | H2AFY    | H2A histone family, member Y                                                     |
| Hs.420757.1.15 | chr1:214172057:214076627  | 214169930 | s | NM_018040    | 5  | CDS  | 55105  | GPATC2   | G patch domain containing 2                                                      |
| Hs.42146.1.9   | chr2:222984390:222922508  | 222983859 | s | NM_181457    | 4  | CDS  | 5077   | PAX3     | paired box gene 3 (Waardenburg syndrome 1)                                       |
| Hs.421848.1.11 | chr10:102733501:102729120 | 102731127 | s | NM_176792    | 4  | CDS  | 84545  | MRPL43   | mitochondrial ribosomal protein L43                                              |
| Hs.422569.1.1  | chr15:43595383:43634979   | 43599158  | s | NM_001005269 | 3  | 5UTR | 283651 | C15orf21 | chromosome 15 open reading frame 21                                              |
| Hs.424589.1.2  | chr1:52820696:52837093    | 52834758  | s | NM_182621    | 3  | 3UTR | 348378 | MGC52498 | hypothetical protein MGC52498                                                    |
| Hs.425023.1.4  | chr20:13088780:13093400   | 13093118  | s | AK075271     | 3  | CDS  | 140911 | SPTLC2L  | serine palmitoyltransferase, long chain base subunit 2-like (aminotransferase 2) |
| Hs.426324.1.16 | chr8:15632610:15645417    | 15635525  | s | NM_006765    | 7  | CDS  | 7991   | TUSC3    | tumor suppressor candidate 3                                                     |
| Hs.426324.1.23 | chr8:15659736:15666082    | 15660077  | s | NM_006765    | 10 | 3UTR | 7991   | TUSC3    | tumor suppressor candidate 3                                                     |
| Hs.426324.1.25 | chr8:15659736:15666082    | 15660157  | s | NM_006765    | 10 | 3UTR | 7991   | TUSC3    | tumor suppressor candidate 3                                                     |
| Hs.42771.1.5   | chr18:62353202:62348184   | 62350556  | s | NM_021153    | 8  | CDS  | 28513  | CDH19    | cadherin 19, type 2                                                              |
| Hs.431498.1.39 | chr3:71330042:71244479    | 71329727  | s | NM_032682    | 6  | CDS  | 27086  | FOXP1    | forkhead box P1                                                                  |
| Hs.432397.1.12 | chr10:362945:346033       | 360579    | s | NM_014974    | 31 | CDS  | 22982  | KIAA0934 | KIAA0934                                                                         |
| Hs.432397.1.19 | chr10:402214:400523       | 400902    | s | NM_014974    | 19 | CDS  | 22982  | KIAA0934 | KIAA0934                                                                         |
| Hs.432690.1.6  | chr14:68960673:68978538   | 68965946  | s | NM_018375    | 2  | CDS  | 55334  | SLC39A9  | solute carrier family 39 (zinc transporter), member 9                            |
| Hs.432760.1.14 | chr1:19450339:19429364    | 19445978  | s | NM_004930    | 3  | CDS  | 832    | CAPZB    | capping protein (actin filament) muscle Z-line, beta                             |
| Hs.432842.1.21 | chr9:127016616:127036923  | 127020259 | s | NM_014636    | 11 | CDS  | 9649   | RALGSP1  | Ral GEF with PH domain and SH3 binding motif 1                                   |
| Hs.432842.1.30 | chr9:127056676:127060572  | 127059177 | s | NM_014636    | 18 | CDS  | 9649   | RALGSP1  | Ral GEF with PH domain and SH3 binding motif 1                                   |
| Hs.432842.1.7  | chr9:126819579:126876263  | 126832056 | s | NM_014636    | 4  | CDS  | 9649   | RALGSP1  | Ral GEF with PH domain and SH3 binding motif 1                                   |
| Hs.433062.1.4  | chr6:74008498:73991866    | 74007764  | s | NM_030568    | 4  | CDS  | 80759  | C6orf148 | chromosome 6 open reading frame 148                                              |
| Hs.43322.1.26  | chr5:40805274:40803550    | 40804244  | s | NM_006251    | 5  | CDS  | 5562   | PRKAA1   | protein kinase, AMP-activated, alpha 1 catalytic subunit                         |
| Hs.433728.1.9  | chr18:46444873:46495446   | 46486507  | s | NM_002747    | 1  | CDS  | 5596   | MAPK4    | mitogen-activated protein kinase 4                                               |
| Hs.434133.1.11 | chr19:17521337:17525121   | 17523833  | s | NM_173544    | 15 | CDS  | 199786 | BCNP1    | B-cell novel protein 1                                                           |
| Hs.434219.1.26 | chr5:139824546:139842348  | 139832242 | s | NM_017747    | 10 | CDS  | 54882  | ANKHD1   | ankyrin repeat and KH domain containing 1                                        |
| Hs.434255.1.15 | chr8:18667238:18557476    | 18664675  | s | NM_015310    | 9  | 3UTR | 23362  | PSD3     | pleckstrin and Sec7 domain containing 3                                          |
| Hs.434255.1.32 | chr8:18837823:18774524    | 18826323  | s | NM_015310    | 2  | CDS  | 23362  | PSD3     | pleckstrin and Sec7 domain containing 3                                          |
| Hs.434286.1.20 | chr14:88817046:88726547   | 88766825  | s | U68723       | 4  | CDS  | 1112   | CHES1    | checkpoint suppressor 1                                                          |
| Hs.434296.1.11 | chr6:39660651:39653914    | 39658929  | s | NM_145027    | 9  | CDS  | 221458 | C6orf102 | chromosome 6 open reading frame 102                                              |
| Hs.434385.1.2  | chr1:40624390:40629685    | 40625921  | s | NM_198494    | 5  | CDS  | 339559 | ZNF642   | zinc finger protein 642                                                          |
| Hs.434401.1.23 | chr2:71519351:71534925    | 71527366  | s | NM_001014972 | 10 | CDS  | 27332  | ZNF638   | zinc finger protein 638                                                          |
| Hs.434406.1.3  | chr19:24081286:24100895   | 24081994  | s | NM_004876    | 3  | CDS  | 9534   | ZNF254   | zinc finger protein 254                                                          |
| Hs.434418.1.7  | chr2:1860607:1825773      | 1857946   | s | NM_015025    | 18 | CDS  | 23040  | MYT1L    | myelin transcription factor 1-like                                               |
| Hs.434864.1.4  | chr16:29915683:29919579   | 29916765  | s | NM_173618    | 3  | CDS  | 283899 | FLJ90652 | hypothetical protein FLJ90652                                                    |
| Hs.434900.1.13 | chr3:73734194:73536237    | 73539899  | s | NM_015009    | 3  | CDS  | 23024  | PDZRN3   | PDZ domain containing RING finger 3                                              |
| Hs.434961.1.14 | chr6:16861442:16766112    | 16845061  | s | NM_000332    | 3  | 5UTR | 6310   | ATXN1    | ataxin 1                                                                         |
| Hs.434961.1.15 | chr6:16861442:16766112    | 16846688  | s | NM_000332    | 3  | 5UTR | 6310   | ATXN1    | ataxin 1                                                                         |
| Hs.434996.1.12 | chr12:108851736:108839773 | 108848590 | s | NM_057170    | 14 | CDS  | 9815   | GIT2     | G protein-coupled receptor kinase interactor 2                                   |
| Hs.435022.1.20 | chr22:30535753:30539561   | 30536528  | s | NM_014662    | 21 | CDS  | 9681   | DEPDC5   | DEP domain containing 5                                                          |
| Hs.435023.1.4  | chr2:241179768:241172350  | 241179162 | s | NM_016552    | 8  | CDS  | 51281  | ANKMY1   | ankyrin repeat and MYND domain containing 1                                      |
| Hs.435039.1.9  | chr2:236497976:236573988  | 236543846 | s | NM_014914    | 9  | CDS  | 116987 | CENTG2   | centaurin, gamma 2                                                               |
| Hs.435044.1.15 | chr22:45628604:45690704   | 45630207  | s | NM_014346    | 8  | CDS  | 25771  | TBC1D22A | TBC1 domain family, member 22A                                                   |
| Hs.435064.1.11 | chr9:123282192:123245324  | 123255104 | s | NM_020946    | 19 | CDS  | 57706  | KIAA1608 | KIAA1608                                                                         |
| Hs.435064.1.6  | chr9:123245234:123225747  | 123243384 | s | NM_020946    | 20 | CDS  | 57706  | KIAA1608 | KIAA1608                                                                         |

|                |                           |           |   |              |    |      |        |           |                                                                                       |
|----------------|---------------------------|-----------|---|--------------|----|------|--------|-----------|---------------------------------------------------------------------------------------|
| Hs.435064.1.7  | chr9:123245234:123225747  | 123243424 | s | NM_020946    | 20 | CDS  | 57706  | KIAA1608  | KIAA1608                                                                              |
| Hs.435168.1.2  | chr12:129981006:129991308 | 129982784 | s | NM_198827    | 4  | CDS  | 283383 | GPR133    | G protein-coupled receptor 133                                                        |
| Hs.435237.1.18 | chr5:60249848:60236458    | 60241198  | s | NM_000082    | 4  | CDS  | 1161   | ERCC8     | excision repair cross-complementing rodent repair deficiency, complementation group 8 |
| Hs.435302.1.13 | chr7:99317408:99307187    | 99314218  | s | AF193057     | 5  | CDS  | 7551   | ZNF3      | zinc finger protein 3 (A8-51)                                                         |
| Hs.435309.1.12 | chr9:16572980:16542764    | 16569794  | s | NM_017637    | 2  | CDS  | 54796  | BNC2      | basonuclin 2                                                                          |
| Hs.435458.1.2  | chr18:40703247:40783843   | 40711377  | s | NM_015559    | 2  | CDS  | 26040  | SETBP1    | SET binding protein 1                                                                 |
| Hs.435561.1.42 | chr11:107711899:107719158 | 107712345 | s | NM_000051    | 57 | CDS  | 472    | ATM       | ataxia telangiectasia mutated (includes complementation groups A, C and D)            |
| Hs.435610.1.16 | chr10:28919768:28937120   | 28924975  | s | NM_100486    | 6  | CDS  | 51322  | WAC       | WW domain containing adaptor with coiled-coil                                         |
| Hs.435661.1.15 | chr14:77088191:77057678   | 77071696  | s | NM_004863    | 9  | CDS  | 9517   | SPTLC2    | serine palmitoyltransferase, long chain base subunit 2                                |
| Hs.435774.1.7  | chr10:38346321:38383311   | 38369509  | s | NM_006974    | 2  | CDS  | 7581   | ZNF33A    | zinc finger protein 33A                                                               |
| Hs.435841.1.12 | chr2:233425454:233437829  | 233426756 | s | NM_015575    | 5  | CDS  | 26058  | TNRC15    | trinucleotide repeat containing 15                                                    |
| Hs.435841.1.13 | chr2:233425454:233437829  | 233426860 | s | NM_015575    | 5  | CDS  | 26058  | TNRC15    | trinucleotide repeat containing 15                                                    |
| Hs.435941.1.3  | chr16:23561846:23577328   | 23569969  | s | NM_032486    | 2  | CDS  | 84516  | MGC3248   | dynactin 4                                                                            |
| Hs.435948.1.17 | chr10:89517409:89509525   | 89516043  | s | BC073998     | 7  | CDS  | 84896  | ATAD1     | ATPase family, AAA domain containing 1                                                |
| Hs.436040.1.12 | chr16:81716608:81808450   | 81772131  | s | NM_001257    | 4  | CDS  | 1012   | CDH13     | cadherin 13, H-cadherin (heart)                                                       |
| Hs.436040.1.13 | chr16:81716608:81808450   | 81772200  | s | NM_001257    | 4  | CDS  | 1012   | CDH13     | cadherin 13, H-cadherin (heart)                                                       |
| Hs.436197.1.2  | chr12:95653835:95660396   | 95658814  | s | NM_198520    | 25 | CDS  | 374467 | FLJ44112  | FLJ44112 protein                                                                      |
| Hs.436237.1.5  | chr17:77949360:77945709   | 77947710  | s | NM_175902    | 8  | CDS  | 79701  | FLJ22222  | hypothetical protein FLJ22222                                                         |
| Hs.436242.1.8  | chr10:32820932:32846878   | 32828315  | s | NM_145023    | 10 | CDS  | 221016 | CCDC7     | coiled-coil domain containing 7                                                       |
| Hs.436367.1.7  | chr18:19618120:19644327   | 19630110  | s | NM_198129    | 12 | CDS  | 3909   | LAMA3     | laminin, alpha 3                                                                      |
| Hs.436625.1.1  | chr11:92705103:92728184   | 92725321  | s | NM_181645    | 2  | CDS  | 159989 | FLJ25393  | hypothetical protein FLJ25393                                                         |
| Hs.436721.1.22 | chr1:15434529:15437628    | 15436119  | s | AK093883     | 5  | CDS  | 114827 | FHAD1     | forkhead-associated (FHA) phosphopeptide binding domain 1                             |
| Hs.436873.1.7  | chr2:187326441:187327297  | 187326922 | s | NM_002210    | 7  | CDS  | 3685   | ITGAV     | integrin, alpha V (vitronectin receptor, alpha polypeptide, antigen CD51)             |
| Hs.436896.1.12 | chr10:79409904:79399820   | 79407209  | s | BC014399     | 7  | CDS  | 11128  | POLR3A    | polymerase (RNA) III (DNA directed) polypeptide A, 155kDa                             |
| Hs.436896.1.3  | chr10:79409904:79399820   | 79406191  | s | BC014399     | 7  | CDS  | 11128  | POLR3A    | polymerase (RNA) III (DNA directed) polypeptide A, 155kDa                             |
| Hs.43697.1.24  | chr3:187305795:187281667  | 187295613 | s | NM_004454    | 5  | CDS  | 2119   | ETV5      | ets variant gene 5 (ets-related molecule)                                             |
| Hs.437179.1.9  | chr8:38242815:38241280    | 38241414  | s | BC033025     | 6  | CDS  | 84513  | PPAPDC1B  | phosphatidic acid phosphatase type 2 domain containing 1B                             |
| Hs.437256.1.24 | chr15:55791679:55814956   | 55794400  | s | AK074767     | 3  | CDS  | 81488  | GRINL1A   | glutamate receptor, ionotropic, N-methyl D-aspartate-like 1A                          |
| Hs.437256.1.30 | chr15:55791679:55814956   | 55797043  | s | AK074767     | 3  | CDS  | 81488  | GRINL1A   | glutamate receptor, ionotropic, N-methyl D-aspartate-like 1A                          |
| Hs.438236.1.26 | chr10:116201372:116197770 | 116199829 | s | NM_001003407 | 14 | CDS  | 3983   | ABLIM1    | actin binding LIM protein 1                                                           |
| Hs.438250.1.3  | chr15:63985476:63978327   | 63981164  | s | NM_032445    | 19 | CDS  | 84465  | MEGF11    | MEGF11 protein                                                                        |
| Hs.438250.1.5  | chr15:63985476:63981930   | 63985129  | s | AY358226     | 5  | 3UTR | 84465  | MEGF11    | MEGF11 protein                                                                        |
| Hs.438550.1.58 | chr11:133598966:133595831 | 133598204 | s | NM_015261    | 1  | CDS  | 23310  | hCAP-D3   | KIAA0056 protein                                                                      |
| Hs.438709.1.9  | chr5:126786364:126796953  | 126788195 | s | NM_032446    | 14 | CDS  | 84466  | MEGF10    | MEGF10 protein                                                                        |
| Hs.438720.1.20 | chr7:99341926:99338248    | 99341413  | s | AF279900     | 1  | CDS  | 4176   | MCM7      | MCM7 minichromosome maintenance deficient 7 (S. cerevisiae)                           |
| Hs.438906.1.4  | chr22:30408695:30397559   | 30405574  | s | NM_173566    | 5  | CDS  | 253143 | MGC50372  | hypothetical protein MGC50372                                                         |
| Hs.438994.1.13 | chr19:63449973:63464028   | 63454885  | s | NM_014480    | 5  | CDS  | 27300  | ZNF544    | zinc finger protein 544                                                               |
| Hs.439199.1.5  | chrY:15273281:15374198    | 15283553  | s | NM_014893    | 3  | CDS  | 22829  | NLGN4Y    | neuroligin 4, Y-linked                                                                |
| Hs.440049.1.13 | chr3:127661193:127643488  | 127660451 | s | NM_025112    | 7  | CDS  | 79364  | ZXDC      | ZXD family zinc finger C                                                              |
| Hs.440384.1.12 | chr7:98722062:98726303    | 98724596  | s | NM_213603    | 3  | CDS  | 285989 | LOC285989 | hypothetical protein LOC285989                                                        |
| Hs.440508.1.8  | chr6:130546940:130538847  | 130545826 | s | NM_001017373 | 7  | CDS  | 154075 | SAMD3     | sterile alpha motif domain containing 3                                               |
| Hs.440955.1.10 | chr2:182165522:182168989  | 182166451 | s | NM_000885    | 4  | CDS  | 3676   | ITGA4     | integrin, alpha 4 (antigen CD49D, alpha 4 subunit of VLA-4 receptor)                  |

|                |                           |           |   |              |    |      |        |               |                                                                                                                                  |
|----------------|---------------------------|-----------|---|--------------|----|------|--------|---------------|----------------------------------------------------------------------------------------------------------------------------------|
| Hs.440961.1.5  | chr5:96088991:96091071    | 96090642  | s | BX648397     | 3  | CDS  | 831    | CAST          | calpastatin                                                                                                                      |
| Hs.441145.1.12 | chr3:40440459:40443766    | 40441494  | s | NM_001248    | 10 | CDS  | 956    | ENTPD3        | ectonucleoside triphosphate diphosphohydrolase 3                                                                                 |
| Hs.442578.1.3  | chr1:194618785:194620758  | 194619553 | s | NM_001014434 | 2  | CDS  | 56956  | LHX9          | LIM homeobox 9                                                                                                                   |
| Hs.442592.1.39 | chr5:148909830:148884928  | 148909084 | s | NM_001892    | 2  | CDS  | 1452   | CSNK1A1       | casein kinase 1, alpha 1                                                                                                         |
| Hs.442657.1.8  | chr2:101086430:101086007  | 101086020 | s | NM_007063    | 16 | CDS  | 11138  | TBC1D8        | TBC1 domain family, member 8 (with GRAM domain)                                                                                  |
| Hs.442707.1.12 | chr8:74106923:74113904    | 74113587  | s | NM_003218    | 7  | CDS  | 7013   | TERF1         | telomeric repeat binding factor (NIMA-interacting) 1                                                                             |
| Hs.443139.1.15 | chr8:145327433:145347490  | 145340356 | s | AK092861     | 1  | 5UTR | 377711 | KIAA1833      | hypothetical protein KIAA1833                                                                                                    |
| Hs.443330.1.14 | chr19:55183440:55176083   | 55176774  | s | NM_016440    | 12 | CDS  | 51231  | VRK3          | vaccinia related kinase 3                                                                                                        |
| Hs.443330.1.19 | chr19:55183440:55176083   | 55181368  | s | NM_016440    | 12 | CDS  | 51231  | VRK3          | vaccinia related kinase 3                                                                                                        |
| Hs.443430.1.20 | chr22:18257483:18245539   | 18257093  | s | NM_006440    | 11 | CDS  | 10587  | TXNRD2        | thioredoxin reductase 2                                                                                                          |
| Hs.443481.1.12 | chr2:68273484:68270229    | 68270543  | s | NM_138458    | 7  | CDS  | 116143 | LOC116143     | hypothetical protein BC014022                                                                                                    |
| Hs.443490.1.12 | chrX:21631279:21646241    | 21635368  | s | NM_015884    | 5  | CDS  | 51360  | MBTPS2        | membrane-bound transcription factor protease, site 2                                                                             |
| Hs.443529.1.2  | chr8:67752744:67754509    | 67753084  | s | NM_019607    | 3  | CDS  | 56260  | C8orf44       | chromosome 8 open reading frame 44                                                                                               |
| Hs.443744.1.5  | chr7:128136780:128128298  | 128134635 | s | NM_199349    | 8  | CDS  | 375616 | CRIM2         | cysteine rich BMP regulator 2 (chordin-like)                                                                                     |
| Hs.443875.1.19 | chr5:112367674:112374351  | 112371594 | s | BC064593     | 8  | CDS  | 167227 | DCP2          | DCP2 decapping enzyme homolog (S. cerevisiae)                                                                                    |
| Hs.444024.1.24 | chr11:130281057:130278490 | 130280770 | s | NM_014758    | 7  | CDS  | 399979 | SNX19         | sorting nexin 19                                                                                                                 |
| Hs.444229.1.12 | chr4:87253294:87255901    | 87254093  | s | NM_031305    | 4  | CDS  | 83478  | ARHGAP24      | Rho GTPase activating protein 24                                                                                                 |
| Hs.444292.1.14 | chr6:97801224:97788578    | 97800576  | s | NM_198468    | 11 | CDS  | 253714 | C6orf167      | chromosome 6 open reading frame 167                                                                                              |
| Hs.444292.1.16 | chr6:97817931:97809331    | 97813260  | s | NM_198468    | 9  | CDS  | 253714 | C6orf167      | chromosome 6 open reading frame 167                                                                                              |
| Hs.444362.1.19 | chr3:189908884:189960602  | 189947108 | s | NM_005578    | 7  | CDS  | 4026   | LPP           | LIM domain containing preferred translocation partner in lipoma                                                                  |
| Hs.444389.1.4  | chr8:23347774:23299504    | 23342620  | s | BC034477     | 12 | CDS  | 9583   | ENTPD4        | ectonucleoside triphosphate diphosphohydrolase 4                                                                                 |
| Hs.444451.1.20 | chr2:173907486:173919923  | 173911813 | s | NM_016653    | 11 | CDS  | 51776  | ZAK           | sterile alpha motif and leucine zipper containing kinase AZK solute carrier family 2 (facilitated glucose transporter), member 9 |
| Hs.444612.1.16 | chr4:9674673:9663687      | 9673562   | s | NM_001001290 | 4  | CDS  | 56606  | SLC2A9        | sterile alpha motif and leucine zipper containing kinase AZK solute carrier family 2 (facilitated glucose transporter), member 9 |
| Hs.444724.1.22 | chr3:28348863:28343446    | 28348187  | s | NM_022461    | 6  | CDS  | 64343  | AZI2          | 5-azacytidine induced 2                                                                                                          |
| Hs.444842.1.6  | chr6:70896837:70904297    | 70897816  | s | NM_001858    | 18 | CDS  | 1310   | COL19A1       | collagen, type XIX, alpha 1                                                                                                      |
| Hs.445061.1.18 | chr16:69322898:69290216   | 69322682  | s | NM_018052    | 14 | CDS  | 55697  | VAC14         | Vac14 homolog (S. cerevisiae)                                                                                                    |
| Hs.445244.1.3  | chr6:107934325:107961355  | 107942972 | s | NM_018013    | 3  | CDS  | 55084  | FLJ10159      | hypothetical protein FLJ10159                                                                                                    |
| Hs.445356.1.2  | chr9:12766027:12811384    | 12767577  | s | NM_203403    | 1  | CDS  | 286343 | C9orf150      | chromosome 9 open reading frame 150                                                                                              |
| Hs.445748.1.32 | chr11:72372780:72310644   | 72372458  | s | NM_014824    | 7  | CDS  | 9873   | FCHSD2        | FCH and double SH3 domains 2                                                                                                     |
| Hs.445775.1.29 | chr15:73596654:73588424   | 73592587  | s | NM_002833    | 5  | CDS  | 5780   | PTPN9         | protein tyrosine phosphatase, non-receptor type 9                                                                                |
| Hs.445814.1.8  | chr12:42411774:42410773   | 42410820  | s | NM_031292    | 8  | CDS  | 83448  | DKFZP434G1415 | hypothetical protein DKFZp434G1415                                                                                               |
| Hs.445892.1.15 | chr3:42574073:42565154    | 42569401  | s | AY359041     | 5  | CDS  | 9117   | SEC22L3       | SEC22 vesicle trafficking protein-like 3 (S. cerevisiae)                                                                         |
| Hs.446083.1.42 | chr9:8518590:8517354      | 8518152   | s | NM_002839    | 5  | CDS  | 5789   | PTPRD         | protein tyrosine phosphatase, receptor type, D                                                                                   |
| Hs.446146.1.33 | chr19:53436030:53429613   | 53433404  | s | NM_014959    | 2  | 5UTR | 22900  | CARD8         | caspase recruitment domain family, member 8                                                                                      |
| Hs.446164.1.9  | chr18:28575888:28529514   | 28568080  | s | NM_020805    | 3  | CDS  | 57565  | KLHL14        | kelch-like 14 (Drosophila)                                                                                                       |
| Hs.446291.1.7  | chr8:16045437:16022487    | 16022769  | s | NM_138715    | 8  | CDS  | 4481   | MSR1          | macrophage scavenger receptor 1                                                                                                  |
| Hs.448012.1.10 | chr17:18466536:18454331   | 18464124  | s | NM_182568    | 2  | CDS  | 284047 | FLJ36492      | hypothetical protein FLJ36492                                                                                                    |
| Hs.448012.1.9  | chr17:18451934:18450658   | 18450701  | s | NM_182568    | 4  | CDS  | 284047 | FLJ36492      | hypothetical protein FLJ36492                                                                                                    |
| Hs.453723.1.2  | chr7:34591418:34640252    | 34592692  | s | AY310331     | 3  | CDS  | 387129 | GPR154        | G protein-coupled receptor 154                                                                                                   |
| Hs.454808.1.5  | chr1:23162988:23160853    | 23162226  | s | NM_033631    | 4  | CDS  | 7798   | LUZP1         | leucine zipper protein 1                                                                                                         |
| Hs.455089.1.4  | chr4:10132697:10124433    | 10128780  | s | NM_053042    | 2  | 5UTR | 85460  | KIAA1729      | KIAA1729 protein                                                                                                                 |
| Hs.458609.1.43 | chr15:63591685:63586747   | 63591359  | s | NM_017743    | 2  | CDS  | 54878  | DPP8          | dipeptidylpeptidase 8                                                                                                            |

|                |                          |           |   |              |    |      |        |           |                                                                            |
|----------------|--------------------------|-----------|---|--------------|----|------|--------|-----------|----------------------------------------------------------------------------|
| Hs.459187.1.6  | chr15:83239359:83248331  | 83240272  | s | NM_004213    | 6  | CDS  | 9154   | SLC28A1   | solute carrier family 28 (sodium-coupled nucleoside transporter), member 1 |
| Hs.459345.1.6  | chr15:88937992:88946559  | 88943771  | s | NM_022769    | 3  | CDS  | 64784  | TORC3     | transducer of regulated cAMP response element-binding protein (CREB) 3     |
| Hs.459538.1.4  | chr15:99245441:99250237  | 99250062  | s | NM_000693    | 3  | CDS  | 220    | ALDH1A3   | aldehyde dehydrogenase 1 family, member A3                                 |
| Hs.459691.1.20 | chr16:2573588:2576677    | 2573989   | s | NM_002613    | 10 | CDS  | 5170   | PDPK1     | 3-phosphoinositide dependent protein kinase-1                              |
| Hs.460107.1.13 | chr16:15695615:15698066  | 15696988  | s | NM_017668    | 7  | CDS  | 54820  | NDE1      | nudE nuclear distribution gene E homolog 1 (A. nidulans)                   |
| Hs.460355.1.34 | chr16:24110053:24138782  | 24134828  | s | NM_212535    | 16 | CDS  | 5579   | PRKCB1    | protein kinase C, beta 1                                                   |
| Hs.460558.1.10 | chr16:29376838:29380203  | 29377041  | s | NM_001017389 | 3  | 5UTR | 445329 | SULT1A4   | sulfotransferase family, cytosolic, 1A, phenol-preferring, member 4        |
| Hs.461229.1.10 | chr16:69658693:69656245  | 69657984  | s | NM_017558    | 15 | CDS  | 54768  | HYDIN     | hydrocephalus inducing                                                     |
| Hs.461389.1.2  | chr16:75018998:75039409  | 75023945  | s | NM_033401    | 3  | CDS  | 85445  | CNTNAP4   | contactin associated protein-like 4                                        |
| Hs.461727.1.20 | chr16:87714823:87727044  | 87716741  | s | NM_174917    | 7  | CDS  | 197322 | LOC197322 | hypothetical protein LOC197322                                             |
| Hs.461819.1.21 | chr17:451784:436355      | 450872    | s | NM_018289    | 11 | CDS  | 55275  | FLJ10979  | hypothetical protein FLJ10979                                              |
| Hs.461860.1.60 | chr9:131106659:131120152 | 131116626 | s | NM_005085    | 30 | CDS  | 8021   | NUP214    | nucleoporin 214kDa                                                         |
| Hs.462348.1.20 | chr1:5881611:5874566     | 5880821   | s | NM_015102    | 18 | CDS  | 261734 | NPHP4     | nephronophthisis 4                                                         |
| Hs.462445.1.11 | chr17:19191174:19187764  | 19190856  | s | NM_015681    | 5  | CDS  | 27077  | EPPB9     | B9 protein                                                                 |
| Hs.462589.1.75 | chr17:24488159:24473398  | 24484905  | s | AY703984     | 2  | 5UTR | 399687 | MYO18A    | myosin XVIIIa                                                              |
| Hs.462680.1.7  | chr17:25835915:25841269  | 25838711  | s | NM_001007024 | 4  | CDS  | 9527   | GOSR1     | golgi SNAP receptor complex member 1                                       |
| Hs.462777.1.14 | chr17:27956217:27846047  | 27945322  | s | NM_015194    | 21 | CDS  | 4642   | MYO1D     | myosin ID                                                                  |
| Hs.462777.1.15 | chr17:27956217:27846047  | 27945502  | s | NM_015194    | 21 | CDS  | 4642   | MYO1D     | myosin ID                                                                  |
| Hs.463024.1.2  | chr17:36821263:36833131  | 36822371  | s | AK123843     | 3  | 5UTR | NA     | NA        | NA                                                                         |
| Hs.463439.1.70 | chr17:46473860:46453726  | 46463818  | s | NM_003971    | 5  | CDS  | 9043   | SPAG9     | sperm associated antigen 9                                                 |
| Hs.464243.1.18 | chr17:74306584:74306229  | 74306230  | s | NM_025090    | 19 | CDS  | 57602  | USP36     | ubiquitin specific protease 36                                             |
| Hs.464243.1.8  | chr17:74306076:74295336  | 74304565  | s | AK022913     | 21 | 3UTR | 57602  | USP36     | ubiquitin specific protease 36                                             |
| Hs.464585.1.15 | chr18:9211998:9244208    | 9225808   | s | NM_015208    | 8  | CDS  | 23253  | ANKRD12   | ankyrin repeat domain 12                                                   |
| Hs.465554.1.22 | chr19:2165596:2167279    | 2166861   | s | NM_032482    | 19 | CDS  | 84444  | DOT1L     | DOT1-like, histone H3 methyltransferase (S. cerevisiae)                    |
| Hs.465744.1.24 | chr19:7114042:7103939    | 7110438   | s | NM_000208    | 9  | CDS  | 3643   | INSR      | insulin receptor                                                           |
| Hs.466891.1.2  | chr19:49462955:49468891  | 49464206  | s | NM_181756    | 4  | CDS  | 353355 | ZNF233    | zinc finger protein 233                                                    |
| Hs.467084.1.51 | chr1:21013289:20976771   | 21013043  | s | NM_003760    | 9  | CDS  | 8672   | EIF4G3    | eukaryotic translation initiation factor 4 gamma, 3                        |
| Hs.467236.1.14 | chr19:58269204:58265328  | 58267958  | s | NM_033288    | 5  | CDS  | 90338  | ZNF160    | zinc finger protein 160                                                    |
| Hs.467288.1.25 | chr19:59563440:59560388  | 59561427  | s | NM_002287    | 4  | CDS  | 3903   | LAIR1     | leukocyte-associated Ig-like receptor 1                                    |
| Hs.467554.1.3  | chr2:1419164:1436472     | 1422178   | s | NM_000547    | 5  | CDS  | 7173   | TPO       | thyroid peroxidase                                                         |
| Hs.467662.1.18 | chr2:9476086:9479020     | 9476864   | s | NM_003887    | 21 | CDS  | 8853   | DDEF2     | development and differentiation enhancing factor 2                         |
| Hs.467751.1.11 | chr2:12814277:12831049   | 12815539  | s | NM_021643    | 2  | CDS  | 28951  | TRIB2     | tribbles homolog 2 (Drosophila)                                            |
| Hs.467751.1.12 | chr2:12814277:12831049   | 12815596  | s | NM_021643    | 2  | CDS  | 28951  | TRIB2     | tribbles homolog 2 (Drosophila)                                            |
| Hs.467759.1.4  | chr2:15269709:15258046   | 15268671  | s | NM_015909    | 51 | CDS  | 51594  | NAG       | neuroblastoma-amplified protein                                            |
| Hs.467759.1.55 | chr2:15484948:15474040   | 15484361  | s | NM_015909    | 28 | CDS  | 51594  | NAG       | neuroblastoma-amplified protein                                            |
| Hs.467960.1.1  | chr2:26169256:26233181   | 26228370  | s | NM_016131    | 1  | CDS  | 10890  | RAB10     | RAB10, member RAS oncogene family                                          |
| Hs.468125.1.18 | chr2:32839639:32870545   | 32841717  | s | NM_017735    | 10 | CDS  | 55622  | FLJ20272  | hypothetical protein FLJ20272                                              |
| Hs.468349.1.4  | chr2:44529096:44843072   | 44530868  | s | NM_024766    | 3  | CDS  | 79823  | C2orf34   | chromosome 2 open reading frame 34                                         |
| Hs.468653.1.10 | chr2:61222101:61226944   | 61225173  | s | NM_032506    | 8  | CDS  | 84542  | KIAA1841  | KIAA1841 protein                                                           |
| Hs.469045.1.24 | chr2:74688150:74675711   | 74686723  | s | NM_032603    | 4  | CDS  | 84695  | LOXL3     | lysyl oxidase-like 3                                                       |
| Hs.469630.1.12 | chr2:109946405:109949948 | 109947971 | s | NM_005054    | 18 | CDS  | 84220  | RANBP2L1  | RAN binding protein 2-like 1                                               |
| Hs.469798.1.10 | chr7:99716547:99709875   | 99716043  | s | NM_030935    | 3  | CDS  | 81628  | TSC22D4   | TSC22 domain family, member 4                                              |
| Hs.470126.1.10 | chr2:143519043:143546110 | 143538722 | s | NM_003937    | 4  | CDS  | 8942   | KYNU      | kynureninase (L-kynurenine hydrolase)                                      |
| Hs.470126.1.16 | chr2:143552072:143576384 | 143556045 | s | NM_003937    | 8  | CDS  | 8942   | KYNU      | kynureninase (L-kynurenine hydrolase)                                      |
| Hs.470126.1.17 | chr2:143552072:143576384 | 143558795 | s | NM_003937    | 8  | CDS  | 8942   | KYNU      | kynureninase (L-kynurenine hydrolase)                                      |
| Hs.470126.1.18 | chr2:143552072:143576384 | 143562694 | s | NM_003937    | 8  | CDS  | 8942   | KYNU      | kynureninase (L-kynurenine hydrolase)                                      |
| Hs.470553.1.4  | chr2:170494473:170492362 | 170493778 | s | NM_014168    | 7  | 3UTR | 29081  | METTL5    | methyltransferase like 5                                                   |



|                 |                          |           |   |              |    |      |        |          |                                                                                        |
|-----------------|--------------------------|-----------|---|--------------|----|------|--------|----------|----------------------------------------------------------------------------------------|
| Hs.470675.1.16  | chr2:175069157:175041961 | 175048408 | s | NM_004882    | 7  | CDS  | 9541   | CIR      | CBF1 interacting corepressor                                                           |
| Hs.470791.1.15  | chr2:180173504:180137004 | 180171064 | s | NM_152520    | 6  | CDS  | 151126 | ZNF533   | zinc finger protein 533                                                                |
| Hs.470907.1.19  | chr1:33156060:33149289   | 33154383  | s | NM_001625    | 4  | CDS  | 204    | AK2      | adenylate kinase 2                                                                     |
| Hs.471011.1.49  | chr2:198110657:198108819 | 198109026 | s | NM_012433    | 4  | CDS  | 23451  | SF3B1    | splicing factor 3b, subunit 1, 155kDa                                                  |
| Hs.471162.1.7   | chr2:204135096:204131643 | 204131698 | s | NM_213589    | 13 | CDS  | 65059  | RAPH1    | Ras association (RalGDS/AF-6) and pleckstrin homology domains 1                        |
| Hs.471200.1.42  | chr2:206457049:206482464 | 206467382 | s | NM_201266    | 15 | CDS  | 8828   | NRP2     | neuropilin 2                                                                           |
| Hs.471381.1.25  | chr2:218571126:218539317 | 218549458 | s | NM_022648    | 16 | CDS  | 7145   | TNS1     | tensin 1                                                                               |
| Hs.471381.1.26  | chr2:218571126:218549931 | 218569528 | s | BC051304     | 13 | CDS  | 7145   | TNS1     | tensin 1                                                                               |
| Hs.471576.1.13  | chr2:230936161:230939104 | 230938234 | s | U63420       | 7  | CDS  | 11262  | SP140    | SP140 nuclear body protein                                                             |
| Hs.471576.1.8   | chr2:230928602:230931623 | 230929292 | s | NM_007237    | 3  | CDS  | 11262  | SP140    | SP140 nuclear body protein                                                             |
| Hs.471834.1.3   | chr2:241699821:241707721 | 241700769 | s | AK074062     | 7  | CDS  | 25992  | SNED1    | sushi, nidogen and EGF-like domains 1                                                  |
| Hs.471876.1.10  | chr2:242382677:242384393 | 242383439 | s | NM_032329    | 7  | CDS  | 84289  | ING5     | inhibitor of growth family, member 5                                                   |
| Hs.472409.1.13  | chr20:30268186:30279726  | 30269387  | s | NM_015352    | 4  | CDS  | 23509  | POFUT1   | protein O-fucosyltransferase 1                                                         |
| Hs.472558.1.6   | chr20:33594105:33598576  | 33595071  | s | NM_015966    | 4  | CDS  | 51614  | C20orf47 | chromosome 20 open reading frame 47                                                    |
| Hs.47288.1.10   | chr9:70628574:70606195   | 70618558  | s | NM_001007471 | 7  | CDS  | 80036  | TRPM3    | transient receptor potential cation channel, subfamily M, member 3                     |
| Hs.473082.1.18  | chr20:50210068:50148534  | 50201228  | s | NM_199427    | 5  | CDS  | 55734  | ZFP64    | zinc finger protein 64 homolog (mouse)                                                 |
| Hs.473082.1.19  | chr20:50210068:50148534  | 50201503  | s | NM_199427    | 5  | CDS  | 55734  | ZFP64    | zinc finger protein 64 homolog (mouse)                                                 |
| Hs.473087.1.22  | chr1:41137942:41140815   | 41139015  | s | NM_001905    | 12 | CDS  | 1503   | CTPS     | CTP synthase                                                                           |
| Hs.473163.1.16  | chr20:55192184:55183471  | 55186159  | s | NM_001719    | 4  | CDS  | 655    | BMP7     | bone morphogenetic protein 7 (osteogenic protein 1)                                    |
| Hs.473243.1.21  | chr20:60011610:60009173  | 60011100  | s | NM_003185    | 9  | CDS  | 6874   | TAF4     | TAF4 RNA polymerase II, TATA box binding protein (TBP)-associated factor, 135kDa       |
| Hs.473254.1.13  | chr20:60287801:60289508  | 60288669  | s | AK124174     | 1  | CDS  | 9885   | OSBPL2   | oxysterol binding protein-like 2                                                       |
| Hs.473256.1.103 | chr20:60354268:60347060  | 60350336  | s | NM_005560    | 11 | CDS  | 3911   | LAMA5    | laminin, alpha 5                                                                       |
| Hs.473317.1.12  | chr20:62369808:62389475  | 62377450  | s | BC032332     | 5  | CDS  | 55251  | C20orf36 | chromosome 20 open reading frame 36                                                    |
| Hs.473635.1.16  | chr21:33037429:33032502  | 33035521  | s | NM_016631    | 15 | CDS  | 94104  | C21orf66 | chromosome 21 open reading frame 66                                                    |
| Hs.473788.1.5   | chr11:63512801:63520577  | 63514677  | s | NM_017670    | 3  | CDS  | 55611  | OTUB1    | OTU domain, ubiquitin aldehyde binding 1                                               |
| Hs.473894.1.6   | chr21:42192230:42182523  | 42186877  | s | NM_199050    | 12 | CDS  | 25966  | C21orf25 | chromosome 21 open reading frame 25                                                    |
| Hs.474049.1.12  | chr21:46161972:46174261  | 46163820  | s | BC012061     | 8  | CDS  | 54039  | PCBP3    | poly(rC) binding protein 3                                                             |
| Hs.474083.1.18  | chr1:44120387:44125062   | 44122529  | s | NM_001005417 | 6  | CDS  | 8704   | B4GALT2  | UDP-Gal:betaGlcNAc beta 1,4- galactosyltransferase, polypeptide 2                      |
| Hs.474596.1.44  | chr22:29995849:29998836  | 29998178  | s | NM_005569    | 15 | CDS  | 3985   | LIMK2    | LIM domain kinase 2                                                                    |
| Hs.474751.1.84  | chr22:35047112:35043067  | 35044832  | s | NM_002473    | 5  | CDS  | 4627   | MYH9     | myosin, heavy polypeptide 9, non-muscle                                                |
| Hs.474751.1.85  | chr22:35047112:35043067  | 35045578  | s | NM_002473    | 5  | CDS  | 4627   | MYH9     | myosin, heavy polypeptide 9, non-muscle                                                |
| Hs.474982.2.20  | chr22:40240781:40243333  | 40242091  | s | NM_001098    | 9  | CDS  | 50     | ACO2     | aconitase 2, mitochondrial                                                             |
| Hs.475125.1.22  | chr22:44523440:44559407  | 44539694  | s | NM_013236    | 10 | CDS  | 25814  | ATXN10   | ataxin 10                                                                              |
| Hs.475506.1.4   | chr3:12919272:12915934   | 12917076  | s | NM_014869    | 13 | CDS  | 9922   | IQSEC1   | IQ motif and Sec7 domain 1                                                             |
| Hs.475848.1.10  | chr18:664160:663077      | 663712    | s | X67098       | 14 | 3UTR | 55556  | ENOSF1   | enolase superfamily member 1                                                           |
| Hs.475896.1.13  | chr3:33843077:33845348   | 33843760  | s | NM_013374    | 6  | CDS  | 10015  | PDCD6IP  | programmed cell death 6 interacting protein                                            |
| Hs.475902.1.13  | chr3:35700312:35704234   | 35701287  | s | NM_016300    | 5  | CDS  | 10777  | ARPP-21  | cyclic AMP-regulated phosphoprotein, 21 kD                                             |
| Hs.475963.1.7   | chr3:37984378:37987901   | 37984927  | s | NM_001008392 | 5  | CDS  | 10217  | CTDSPL   | CTD (carboxy-terminal domain, RNA polymerase II, polypeptide A) small phosphatase-like |
| Hs.476365.1.18  | chr1:53165830:53192582   | 53171925  | s | NM_002979    | 11 | CDS  | 6342   | SCP2     | sterol carrier protein 2                                                               |
| Hs.477166.1.21  | chr3:115701888:115590643 | 115620590 | s | NM_015642    | 6  | 5UTR | 26137  | ZBTB20   | zinc finger and BTB domain containing 20                                               |
| Hs.477375.1.23  | chr3:124850507:124842026 | 124848497 | s | NM_053029    | 26 | CDS  | 4638   | MYLK     | myosin, light polypeptide kinase                                                       |
| Hs.478048.1.8   | chr3:158121186:158127919 | 158125747 | s | NM_001004316 | 4  | 5UTR | 389170 | FLJ16641 | FLJ16641 protein                                                                       |
| Hs.478095.1.20  | chr3:161501372:161486359 | 161499588 | s | NM_020800    | 12 | CDS  | 57560  | WDR56    | WD repeat domain 56                                                                    |
| Hs.478125.1.29  | chr1:62168058:62195548   | 62169467  | s | NM_005799    | 28 | CDS  | 10207  | INADL    | InaD-like (Drosophila)                                                                 |
| Hs.478230.1.9   | chr3:172812770:172805909 | 172811958 | s | NM_002662    | 24 | CDS  | 5337   | PLD1     | phospholipase D1, phosphatidylcholine-specific                                         |
| Hs.478459.1.28  | chr3:184991471:184998412 | 184993973 | s | NM_018023    | 21 | CDS  | 55689  | YEATS2   | YEATS domain containing 2                                                              |

|                |                          |           |   |              |    |      |        |           |                                                                                                        |
|----------------|--------------------------|-----------|---|--------------|----|------|--------|-----------|--------------------------------------------------------------------------------------------------------|
| Hs.478553.1.27 | chr3:187988374:187989615 | 187988918 | s | NM_001967    | 10 | CDS  | 1974   | EIF4A2    | eukaryotic translation initiation factor 4A, isoform 2                                                 |
| Hs.479116.1.3  | chr4:8325165:8329545     | 8325921   | s | NM_018986    | 2  | CDS  | 54436  | SH3TC1    | SH3 domain and tetrapeptide repeats 1                                                                  |
| Hs.479491.1.4  | chr1:68315483:68276458   | 68303062  | s | NM_001002292 | 11 | CDS  | 79971  | C1orf139  | chromosome 1 open reading frame 139                                                                    |
| Hs.479602.1.24 | chr4:40733308:40673523   | 40711901  | s | NM_173075    | 11 | CDS  | 323    | APBB2     | amyloid beta (A4) precursor protein-binding, family B, member 2 (Fe65-like)                            |
| Hs.479612.1.7  | chr4:40604247:40617209   | 40605163  | s | NM_024677    | 4  | CDS  | 79730  | FLJ14001  | hypothetical protein FLJ14001                                                                          |
| Hs.479954.1.12 | chr4:75390841:75405257   | 75393005  | s | BC037529     | 2  | 5UTR | 441024 | MTHFD2L   | methylenetetrahydrofolate dehydrogenase (NADP+ dependent) 2-like                                       |
| Hs.480188.1.5  | chr1:75389173:75381540   | 75384301  | s | AK093170     | 23 | CDS  | 204962 | MGC34032  | hypothetical protein MGC34032                                                                          |
| Hs.480311.1.10 | chr4:95802205:95851679   | 95828306  | s | NM_001011513 | 3  | CDS  | 10611  | PDLIM5    | PDZ and LIM domain 5                                                                                   |
| Hs.480311.1.31 | chr4:95864774:95896332   | 95866548  | s | NM_001011513 | 7  | CDS  | 10611  | PDLIM5    | PDZ and LIM domain 5                                                                                   |
| Hs.480311.1.5  | chr4:95733714:95802052   | 95735513  | s | NM_001011513 | 2  | CDS  | 10611  | PDLIM5    | PDZ and LIM domain 5                                                                                   |
| Hs.480452.1.33 | chr4:106735441:106703084 | 106732372 | s | NM_176866    | 2  | CDS  | 27068  | PPA2      | inorganic pyrophosphatase 2                                                                            |
| Hs.480694.1.8  | chr4:125988759:125957666 | 125986418 | s | NM_020337    | 1  | CDS  | 57182  | KIAA1223  | KIAA1223 protein                                                                                       |
| Hs.480837.1.38 | chr4:143707930:143684083 | 143705242 | s | NM_003866    | 2  | CDS  | 8821   | INPP4B    | inositol polyphosphate-4-phosphatase, type II, 105kDa                                                  |
| Hs.480876.1.11 | chr4:146343328:146274361 | 146332436 | s | NM_014885    | 5  | CDS  | 10393  | ANAPC10   | anaphase promoting complex subunit 10                                                                  |
| Hs.480938.1.54 | chr4:152122856:152110734 | 152119297 | s | NM_006726    | 28 | CDS  | 987    | LRBA      | LPS-responsive vesicle trafficking, beach and anchor containing                                        |
| Hs.481551.1.20 | chr5:7946027:7948846     | 7946763   | s | NM_002454    | 11 | CDS  | 4552   | MTRR      | 5-methyltetrahydrofolate-homocysteine methyltransferase reductase                                      |
| Hs.481720.1.72 | chr5:16834813:16833851   | 16834795  | s | NM_012334    | 6  | CDS  | 4651   | MYO10     | myosin X                                                                                               |
| Hs.481720.1.76 | chr5:16871117:16847943   | 16867628  | s | NM_012334    | 3  | CDS  | 4651   | MYO10     | myosin X                                                                                               |
| Hs.481927.1.19 | chr5:37031664:37036231   | 37032863  | s | NM_015384    | 11 | CDS  | 25836  | NIPBL     | Nipped-B homolog (Drosophila)                                                                          |
| Hs.481927.1.37 | chr5:37074598:37080205   | 37076539  | s | NM_015384    | 34 | CDS  | 25836  | NIPBL     | Nipped-B homolog (Drosophila)                                                                          |
| Hs.481936.1.12 | chr5:37161102:37158348   | 37160730  | s | NM_023073    | 32 | CDS  | 65250  | FLJ13231  | hypothetical protein FLJ13231                                                                          |
| Hs.481936.1.13 | chr5:37174578:37158348   | 37161190  | s | AK096581     | 8  | CDS  | 65250  | FLJ13231  | hypothetical protein FLJ13231                                                                          |
| Hs.481980.1.32 | chr5:39424163:39419131   | 39421031  | s | NM_001343    | 9  | CDS  | 1601   | DAB2      | disabled homolog 2, mitogen-responsive phosphoprotein (Drosophila)                                     |
| Hs.482329.1.4  | chr5:66248603:66318027   | 66262545  | s | NM_198828    | 5  | CDS  | 375449 | LOC375449 | similar to microtubule associated testis specific serine/threonine protein kinase                      |
| Hs.483104.1.12 | chr5:112412688:112407227 | 112412159 | s | NM_002387    | 14 | CDS  | 4163   | MCC       | mutated in colorectal cancers                                                                          |
| Hs.483200.1.1  | chr5:122209288:122300327 | 122210828 | s | NM_014035    | 1  | CDS  | 28966  | SNX24     | sorting nexin 24                                                                                       |
| Hs.483239.1.24 | chr5:125931849:125924716 | 125928034 | s | NM_001182    | 9  | CDS  | 501    | ALDH7A1   | aldehyde dehydrogenase 7 family, member A1                                                             |
| Hs.483329.2.14 | chr5:130803172:130797251 | 130799456 | s | NM_016340    | 24 | CDS  | 51735  | RAPGEF6   | Rap guanine nucleotide exchange factor (GEF) 6                                                         |
| Hs.483390.1.15 | chr5:132676244:132613168 | 132676008 | s | NM_015082    | 6  | CDS  | 23105  | FSTL4     | folistatin-like 4                                                                                      |
| Hs.484844.1.4  | chr6:20656916:20757502   | 20667882  | s | NM_017774    | 4  | CDS  | 54901  | CDKAL1    | CDK5 regulatory subunit associated protein 1-like 1                                                    |
| Hs.484918.1.35 | chr6:25245826:25223308   | 25235049  | s | D86324       | 1  | 5UTR | 8418   | CMAH      | cytidine monophosphate-N-acetylneuraminic acid hydroxylase (CMP-N-acetylneuraminic acid monooxygenase) |
| Hs.485130.1.15 | chr6:33161645:33204819   | 33162529  | s | M57466       | 3  | CDS  | 3115   | HLA-DPB1  | major histocompatibility complex, class II, DP beta 1                                                  |
| Hs.485489.1.16 | chr6:45989942:45978971   | 45987338  | s | NM_016929    | 6  | CDS  | 53405  | CLIC5     | chloride intracellular channel 5                                                                       |
| Hs.485528.1.5  | chr6:49630830:49637375   | 49636606  | s | NM_153344    | 4  | 3UTR | 135398 | C6orf141  | chromosome 6 open reading frame 141                                                                    |
| Hs.485588.1.14 | chr6:54174991:54230064   | 54190841  | s | BC009010     | 5  | CDS  | 90523  | C6orf142  | chromosome 6 open reading frame 142                                                                    |
| Hs.485606.1.23 | chr1:111380890:111379546 | 111380042 | s | NM_178454    | 4  | CDS  | 128338 | MGC54289  | hypothetical protein MGC54289                                                                          |
| Hs.485640.1.22 | chr6:57506277:57575038   | 57561373  | s | NM_000947    | 10 | CDS  | 5558   | PRIM2A    | primase, polypeptide 2A, 58kDa                                                                         |
| Hs.485717.1.8  | chr6:71539850:71565080   | 71558193  | s | NM_021940    | 4  | CDS  | 60682  | SMAP1     | stromal membrane-associated protein 1                                                                  |
| Hs.485865.1.23 | chr6:84960045:84953061   | 84958943  | s | NM_014895    | 10 | CDS  | 22832  | C6orf84   | chromosome 6 open reading frame 84                                                                     |
| Hs.485892.1.4  | chr6:87922197:87982339   | 87936801  | s | AK123473     | 1  | CDS  | 23036  | ZNF292    | zinc finger protein 292                                                                                |
| Hs.486095.1.13 | chr6:107701925:107673517 | 107692083 | s | NM_020381    | 3  | CDS  | 57107  | C6orf210  | chromosome 6 open reading frame 210                                                                    |

|                |                           |           |   |              |    |     |        |           |                                                                                                                 |
|----------------|---------------------------|-----------|---|--------------|----|-----|--------|-----------|-----------------------------------------------------------------------------------------------------------------|
| Hs.486109.1.8  | chr6:108148599:108135909  | 108146851 | s | AK093571     | 5  | CDS | 256380 | SCML4     | sex comb on midleg-like 4 (Drosophila)                                                                          |
| Hs.487062.1.74 | chr6:160481547:160487881  | 160482196 | s | NM_000876    | 44 | CDS | 3482   | IGF2R     | insulin-like growth factor 2 receptor                                                                           |
| Hs.487200.1.20 | chr6:168882424:168884732  | 168883536 | s | NM_022138    | 12 | CDS | 64094  | SMOC2     | SPARC related modular calcium binding 2                                                                         |
| Hs.487294.1.20 | chr19:50556621:50552798   | 50553857  | s | NM_000400    | 12 | CDS | 2068   | ERCC2     | excision repair cross-complementing rodent repair deficiency, complementation group 2 (xeroderma pigmentosum D) |
| Hs.487325.1.16 | chr1:84380510:84391856    | 84383001  | s | NM_002731    | 8  | CDS | 5567   | PRKACB    | protein kinase, cAMP-dependent, catalytic, beta                                                                 |
| Hs.487325.1.17 | chr1:84380510:84391856    | 84383143  | s | NM_002731    | 8  | CDS | 5567   | PRKACB    | protein kinase, cAMP-dependent, catalytic, beta                                                                 |
| Hs.487458.1.41 | chr7:5565717:5554517      | 5554621   | s | NM_207116    | 3  | CDS | 54476  | TRIAD3    | TRIAD3 protein                                                                                                  |
| Hs.487536.1.24 | chr4_random:536885:482585 | 489208    | s | AK092792     | 2  | CDS | 441057 | FLJ44253  | hypothetical gene supported by AK096952; AK126241; BC068588                                                     |
| Hs.487562.1.32 | chr4_random:313034:255920 | 262910    | s | BC073934     | 2  | CDS | 285458 | LOC285458 | hypothetical protein LOC285458                                                                                  |
| Hs.487925.1.75 | chr1:142435668:142412866  | 142431224 | s | NM_001002812 | 5  | CDS | 9659   | PDE4DIP   | phosphodiesterase 4D interacting protein (myomegalin)                                                           |
| Hs.487925.1.93 | chr1:142504903:142483746  | 142502874 | s | NM_022359    | 3  | CDS | 9659   | PDE4DIP   | phosphodiesterase 4D interacting protein (myomegalin)                                                           |
| Hs.488189.1.19 | chr7:44648367:44643003    | 44647148  | s | NM_138635    | 4  | CDS | 94239  | H2AFV     | H2A histone family, member V                                                                                    |
| Hs.489603.1.25 | chr7:105023000:104899687  | 104994772 | s | AK097574     | 3  | UTR | 222255 | ATXN7L4   | ataxin 7-like 4                                                                                                 |
| Hs.489603.1.27 | chr7:105023000:104899687  | 104995347 | s | AK097574     | 3  | UTR | 222255 | ATXN7L4   | ataxin 7-like 4                                                                                                 |
| Hs.489603.1.35 | chr7:105110208:105023106  | 105109490 | s | NM_152749    | 2  | CDS | 222255 | ATXN7L4   | ataxin 7-like 4                                                                                                 |
| Hs.489646.1.43 | chr7:107185621:107174755  | 107176832 | s | NM_002291    | 24 | CDS | 3912   | LAMB1     | laminin, beta 1                                                                                                 |
| Hs.489811.1.15 | chr7:120189630:120200630  | 120190983 | s | NM_198266    | 4  | CDS | 54556  | ING3      | inhibitor of growth family, member 3                                                                            |
| Hs.489849.1.6  | chr7:122381163:122368535  | 122371037 | s | NM_022444    | 7  | CDS | 6561   | SLC13A1   | solute carrier family 13 (sodium/sulfate symporters), member 1                                                  |
| Hs.490224.1.12 | chr7:134535924:134505194  | 134530017 | s | NM_013316    | 10 | CDS | 4850   | CNOT4     | CCR4-NOT transcription complex, subunit 4                                                                       |
| Hs.490224.1.16 | chr7:134535924:134505194  | 134530669 | s | NM_013316    | 10 | CDS | 4850   | CNOT4     | CCR4-NOT transcription complex, subunit 4                                                                       |
| Hs.490555.1.23 | chr7:150171385:150175002  | 150172289 | s | NM_007188    | 9  | CDS | 11194  | ABCB8     | ATP-binding cassette, sub-family B (MDR/TAP), member 8                                                          |
| Hs.490684.1.1  | chr7:153701650:153867178  | 153817989 | s | NM_001936    | 5  | CDS | 1804   | DPP6      | dipeptidylpeptidase 6                                                                                           |
| Hs.490715.1.16 | chr7:155950741:155967865  | 155952520 | s | NM_030936    | 7  | CDS | 140545 | RNF32     | ring finger protein 32                                                                                          |
| Hs.490874.1.17 | chr1:151995432:152016183  | 151996687 | s | NM_002455    | 5  | CDS | 4580   | MTX1      | metaxin 1                                                                                                       |
| Hs.490981.1.9  | chr8:10214910:10323067    | 10232743  | s | NM_012331    | 5  | CDS | 4482   | MSRA      | methionine sulfoxide reductase A                                                                                |
| Hs.491351.1.72 | chr17:55117952:55122778   | 55119290  | s | NM_004859    | 30 | CDS | 1213   | CLTC      | clathrin, heavy polypeptide (Hc)                                                                                |
| Hs.49143.1.10  | chr16:14241843:14246885   | 14242826  | s | NM_014048    | 10 | CDS | 57496  | MKL2      | MKL/myocardin-like 2                                                                                            |
| Hs.491558.1.9  | chr8:41640333:41632430    | 41637664  | s | NM_020480    | 2  | CDS | 286    | ANK1      | ankyrin 1, erythrocytic                                                                                         |
| Hs.492716.1.12 | chr8:124182429:124186708  | 124185622 | s | NM_145647    | 7  | CDS | 93594  | WDR67     | WD repeat domain 67                                                                                             |
| Hs.493218.1.16 | chr8:146033697:146042167  | 146039406 | s | AK096025     | 4  | CDS | 7553   | ZNF7      | zinc finger protein 7 (KOX 4, clone HF.16)                                                                      |
| Hs.494146.1.18 | chr9:71545111:71542675    | 71543662  | s | NM_013390    | 19 | CDS | 23670  | TMEM2     | transmembrane protein 2                                                                                         |
| Hs.49421.1.11  | chr1:67039850:67025383    | 67025628  | s | NM_024763    | 7  | CDS | 79819  | WDR78     | WD repeat domain 78                                                                                             |
| Hs.494312.1.29 | chr9:84596555:84711171    | 84655349  | s | NM_001018064 | 14 | CDS | 4915   | NTRK2     | neurotrophic tyrosine kinase, receptor, type 2                                                                  |
| Hs.494312.1.30 | chr9:84596555:84711171    | 84655479  | s | NM_001018064 | 14 | CDS | 4915   | NTRK2     | neurotrophic tyrosine kinase, receptor, type 2                                                                  |
| Hs.494529.1.8  | chr9:94953299:94949107    | 94952342  | s | NM_000136    | 13 | CDS | 2176   | FANCC     | Fanconi anemia, complementation group C                                                                         |
| Hs.494875.1.13 | chr9:113378753:113425283  | 113383925 | s | NM_130795    | 10 | CDS | 5998   | RGS3      | regulator of G-protein signalling 3                                                                             |
| Hs.494892.1.4  | chr9:114052861:114061624  | 114060413 | s | NM_032888    | 12 | CDS | 85301  | COL27A1   | collagen, type XXVII, alpha 1                                                                                   |
| Hs.495138.1.19 | chr9:125384891:125348251  | 125363301 | s | NM_001006617 | 7  | CDS | 79109  | MAPKAP1   | mitogen-activated protein kinase associated protein 1                                                           |
| Hs.495391.1.19 | chr1:171094941:171338169  | 171249356 | s | NM_014857    | 13 | CDS | 9910   | RABGAP1L  | RAB GTPase activating protein 1-like                                                                            |
| Hs.495410.1.17 | chr9:132563611:132557434  | 132563028 | s | NM_022779    | 6  | CDS | 64794  | DDX31     | DEAD (Asp-Glu-Ala-Asp) box polypeptide 31                                                                       |
| Hs.495419.1.14 | chr9:133066407:133061007  | 133065989 | s | NM_021996    | 3  | CDS | 26301  | GBGT1     | globoside alpha-1,3-N-acetylgalactosaminyltransferase 1                                                         |
| Hs.495511.1.28 | chr9:137952687:137961136  | 137954679 | s | NM_024757    | 14 | CDS | 79813  | EHMT1     | euchromatic histone-lysine N-methyltransferase 1                                                                |

|                |                           |           |   |              |    |      |        |          |                                                                         |
|----------------|---------------------------|-----------|---|--------------|----|------|--------|----------|-------------------------------------------------------------------------|
| Hs.495553.1.11 | chr9:137536781:137526658  | 137536434 | s | NM_017820    | 7  | CDS  | 54932  | FLJ20433 | hypothetical protein FLJ20433                                           |
| Hs.495553.1.20 | chr9:137565591:137553667  | 137562094 | s | NM_017820    | 2  | CDS  | 54932  | FLJ20433 | hypothetical protein FLJ20433                                           |
| Hs.495656.1.2  | chrX:9418137:9431990      | 9423171   | s | BC032708     | 4  | 5UTR | 6907   | TBL1X    | transducin (beta)-like 1X-linked                                        |
| Hs.495710.1.10 | chrX:13554013:13550807    | 13551730  | s | NM_001001995 | 7  | CDS  | 2824   | GPM6B    | glycoprotein M6B                                                        |
| Hs.495912.1.41 | chrX:32120907:32120057    | 32120405  | s | NM_000109    | 40 | CDS  | 1756   | DMD      | dystrophin (muscular dystrophy, Duchenne and Becker types)              |
| Hs.496530.1.7  | chrX:103025341:103037445  | 103026698 | s | NM_194324    | 2  | CDS  | 286527 | MGC39900 | hypothetical protein MGC39900                                           |
| Hs.497183.1.41 | chr1:182009588:182008452  | 182008469 | s | NM_016389    | 5  | CDS  | 10625  | IVNS1ABP | influenza virus NS1A binding protein                                    |
| Hs.497332.1.2  | chr1:197349223:197325833  | 197341592 | s | NM_031306    | 7  | CDS  | 83479  | DDX59    | DEAD (Asp-Glu-Ala-Asp) box polypeptide 59                               |
| Hs.497384.1.4  | chr1:198549380:198552888  | 198551601 | s | NM_018085    | 4  | CDS  | 55705  | IPO9     | importin 9                                                              |
| Hs.498292.1.10 | chr1:240001666:239989130  | 239993234 | s | NM_181690    | 12 | CDS  | 10000  | AKT3     | v-akt murine thymoma viral oncogene homolog 3 (protein kinase B, gamma) |
| Hs.498494.1.23 | chr15:99723923:99705506   | 99722602  | s | NM_138323    | 13 | CDS  | 5046   | PCSK6    | proprotein convertase subtilisin/kexin type 6                           |
| Hs.49853.1.37  | chr10:70202863:70215898   | 70204887  | s | NM_018237    | 19 | CDS  | 55749  | CCAR1    | cell division cycle and apoptosis regulator 1                           |
| Hs.498586.1.18 | chr10:7655110:7651754     | 7653686   | s | NM_030569    | 11 | CDS  | 80760  | ITIH5    | inter-alpha (globulin) inhibitor H5                                     |
| Hs.498661.1.25 | chr10:11679635:11609573   | 11646132  | s | BC042943     | 2  | CDS  | 9712   | USP6NL   | USP6 N-terminal like                                                    |
| Hs.498740.1.10 | chr10:13529271:13523757   | 13527378  | s | BC031618     | 7  | CDS  | 222389 | C10orf30 | chromosome 10 open reading frame 30                                     |
| Hs.498740.1.5  | chr10:13529271:13521504   | 13523361  | s | NM_152751    | 8  | CDS  | 222389 | C10orf30 | chromosome 10 open reading frame 30                                     |
| Hs.499209.1.51 | chr10:29841669:29828199   | 29836970  | s | NM_003174    | 15 | CDS  | 6840   | SVIL     | supervillin                                                             |
| Hs.499209.1.76 | chr10:30015487:29987004   | 30013187  | s | NM_003174    | 2  | 5UTR | 6840   | SVIL     | supervillin                                                             |
| Hs.499705.1.15 | chr10:60698318:60684210   | 60693648  | s | NM_001001971 | 8  | CDS  | 220965 | FAM13C1  | family with sequence similarity 13, member C1                           |
| Hs.499705.1.16 | chr10:60698318:60684210   | 60693686  | s | NM_001001971 | 8  | CDS  | 220965 | FAM13C1  | family with sequence similarity 13, member C1                           |
| Hs.499984.1.1  | chr10:72246643:72274235   | 72250246  | s | NM_003901    | 2  | CDS  | 8879   | SGPL1    | sphingosine-1-phosphate lyase 1                                         |
| Hs.500245.1.26 | chr10:79246314:79242142   | 79245790  | s | NM_004747    | 19 | CDS  | 9231   | DLG5     | discs, large homolog 5 (Drosophila)                                     |
| Hs.500340.1.25 | chr15:62524361:62534248   | 62530238  | s | NM_016213    | 12 | CDS  | 9325   | TRIP4    | thyroid hormone receptor interactor 4                                   |
| Hs.500512.1.10 | chr10:92972721:92990220   | 92977683  | s | NM_032373    | 2  | CDS  | 84333  | PCGF5    | polycomb group ring finger 5                                            |
| Hs.500741.1.8  | chr10:99629995:99615462   | 99628142  | s | NM_018058    | 14 | CDS  | 55118  | CRTAC1   | cartilage acidic protein 1                                              |
| Hs.501140.1.32 | chr10:118728756:118718214 | 118723873 | s | NM_018330    | 2  | CDS  | 57698  | KIAA1598 | KIAA1598                                                                |
| Hs.50123.1.3   | chr9:101241848:101249765  | 101246758 | s | NM_003452    | 2  | CDS  | 7743   | ZNF189   | zinc finger protein 189                                                 |
| Hs.50158.1.9   | chr19:20620329:20600297   | 20619830  | s | CR749233     | 3  | CDS  | 199777 | ZNF626   | zinc finger protein 626                                                 |
| Hs.502.1.6     | chr6:32905154:32898074    | 32904244  | s | NM_018833    | 11 | CDS  | 6891   | TAP2     | transporter 2, ATP-binding cassette, sub-family B (MDR/TAP)             |
| Hs.502145.1.15 | chr11:21349071:21538310   | 21482318  | s | BC096100     | 15 | CDS  | 4745   | NELL1    | NEL-like 1 (chicken)                                                    |
| Hs.502328.1.28 | chr11:35182764:35184234   | 35184170  | s | NM_000610    | 10 | CDS  | 960    | CD44     | CD44 antigen (homing function and Indian blood group system)            |
| Hs.502618.1.2  | chr11:56992140:57000210   | 56992933  | s | NM_178570    | 1  | CDS  | 349667 | RTN4RL2  | reticulin 4 receptor-like 2                                             |
| Hs.502814.1.14 | chr11:63539299:63524392   | 63533061  | s | NM_014067    | 4  | CDS  | 28992  | LRP16    | LRP16 protein                                                           |
| Hs.503022.1.60 | chr11:68134068:68138675   | 68138636  | s | AF264780     | 21 | CDS  | 55291  | C11orf23 | chromosome 11 open reading frame 23                                     |
| Hs.503178.1.97 | chr2:54798788:54803240    | 54800049  | s | NM_003128    | 31 | CDS  | 6711   | SPTBN1   | spectrin, beta, non-erythrocytic 1                                      |
| Hs.503297.1.34 | chr11:74878929:74868182   | 74873998  | s | BC018771     | 2  | 5UTR | 81544  | GDPD5    | glycerophosphodiester phosphodiesterase domain containing 5             |
| Hs.503438.1.4  | chr11:82600121:82613544   | 82603890  | s | NM_182603    | 5  | CDS  | 338699 | ANKRD42  | ankyrin repeat domain 42                                                |
| Hs.503776.1.9  | chr2:135582838:135575128  | 135579472 | s | NM_001018046 | 6  | CDS  | 80122  | YSK4     | Yeast Sps1/Ste20-related kinase 4 (S. cerevisiae)                       |
| Hs.505033.1.19 | chr12:25289474:25271614   | 25278035  | s | NM_004985    | 2  | CDS  | 3845   | KRAS     | v-Ki-ras2 Kirsten rat sarcoma viral oncogene homolog                    |
| Hs.505802.1.12 | chr22:41312458:41308077   | 41311700  | s | NM_032311    | 7  | CDS  | 84271  | POLDIP3  | polymerase (DNA-directed), delta interacting protein 3                  |
| Hs.505924.1.3  | chr12:64518617:64631429   | 64537567  | s | NM_003483    | 3  | CDS  | 8091   | HMGA2    | high mobility group AT-hook 2                                           |
| Hs.505924.1.5  | chr12:64561938:64631429   | 64595574  | s | NM_001015886 | 4  | 3UTR | 8091   | HMGA2    | high mobility group AT-hook 2                                           |
| Hs.506382.1.6  | chr3:3145873:3153943      | 3147376   | s | NM_016000    | 1  | CDS  | 51095  | TRNT1    | tRNA nucleotidyl transferase, CCA-adding, 1                             |
| Hs.50678.1.12  | chr6:100042796:100030828  | 100036859 | s | AL713747     | 5  | CDS  | 85015  | USP45    | ubiquitin specific protease 45                                          |
| Hs.50678.1.8   | chr6:100019200:100001061  | 100017195 | s | AL832030     | 6  | CDS  | 85015  | USP45    | ubiquitin specific protease 45                                          |
| Hs.507025.1.3  | chr3:170975052:170979373  | 170979328 | s | AF155508     | 2  | CDS  | 55892  | MYNN     | myoneurin                                                               |

|                |                           |           |   |              |    |      |        |               |                                                                                                          |
|----------------|---------------------------|-----------|---|--------------|----|------|--------|---------------|----------------------------------------------------------------------------------------------------------|
| Hs.507125.1.21 | chr12:120868796:120875869 | 120870592 | s | NM_144668    | 18 | CDS  | 144406 | WDR66         | WD repeat domain 66                                                                                      |
| Hs.507125.1.22 | chr12:120868796:120875869 | 120872374 | s | NM_144668    | 18 | CDS  | 144406 | WDR66         | WD repeat domain 66                                                                                      |
| Hs.507185.1.7  | chr16:87108430:87120722   | 87110538  | s | NM_153813    | 4  | CDS  | 161882 | ZFPM1         | zinc finger protein, multitype 1                                                                         |
| Hs.50749.1.9   | chr7:99145491:99135021    | 99143433  | s | NM_033017    | 6  | CDS  | 89122  | TRIM4         | tripartite motif-containing 4                                                                            |
| Hs.507621.1.26 | chr13:27857021:27829823   | 27849569  | s | NM_002019    | 14 | CDS  | 2321   | FLT1          | fms-related tyrosine kinase 1 (vascular endothelial growth factor/vascular permeability factor receptor) |
| Hs.507681.1.31 | chr22:38148689:38156994   | 38152381  | s | NM_153497    | 10 | CDS  | 10454  | MAP3K7IP1     | mitogen-activated protein kinase kinase kinase 7 interacting protein 1                                   |
| Hs.507805.1.29 | chr13:39199686:39260471   | 39223640  | s | AB032960     | 18 | CDS  | 57511  | COG6          | component of oligomeric golgi complex 6                                                                  |
| Hs.507805.1.31 | chr13:39199686:39260471   | 39224635  | s | AB032960     | 18 | CDS  | 57511  | COG6          | component of oligomeric golgi complex 6                                                                  |
| Hs.507945.1.4  | chr13:44871074:44869474   | 44870022  | s | NM_001010875 | 8  | CDS  | 253512 | SLC25A30      | solute carrier family 25, member 30                                                                      |
| Hs.508021.1.13 | chr13:49021594:49017001   | 49018631  | s | NM_018191    | 9  | CDS  | 55213  | RCBTB1        | regulator of chromosome condensation (RCC1) and BTB (POZ) domain containing protein 1                    |
| Hs.50823.1.3   | chr5:325888:357291        | 330055    | s | NM_013232    | 2  | CDS  | 10016  | PDCD6         | programmed cell death 6                                                                                  |
| Hs.508423.1.21 | chr13:94566176:94533546   | 94546199  | s | NM_005845    | 20 | CDS  | 10257  | ABCC4         | ATP-binding cassette, sub-family C (CFTR/MRP), member 4                                                  |
| Hs.508514.1.13 | chr13:97907422:97903465   | 97906237  | s | NM_003576    | 10 | CDS  | 8428   | STK24         | serine/threonine kinase 24 (STE20 homolog, yeast)                                                        |
| Hs.508725.1.20 | chr13:110113798:110101449 | 110103437 | s | NM_024537    | 9  | CDS  | 79587  | FLJ12118      | hypothetical protein FLJ12118                                                                            |
| Hs.508725.1.21 | chr13:110113798:110101449 | 110113192 | s | NM_024537    | 9  | CDS  | 79587  | FLJ12118      | hypothetical protein FLJ12118                                                                            |
| Hs.508725.1.6  | chr13:110094732:110092870 | 110094101 | s | NM_024537    | 13 | CDS  | 79587  | FLJ12118      | hypothetical protein FLJ12118                                                                            |
| Hs.509113.1.3  | chr14:33099168:33215167   | 33151544  | s | NM_022123    | 4  | CDS  | 64067  | NPAS3         | neuronal PAS domain protein 3                                                                            |
| Hs.509113.1.4  | chr14:33215343:33274170   | 33219999  | s | NM_022123    | 5  | CDS  | 64067  | NPAS3         | neuronal PAS domain protein 3                                                                            |
| Hs.509200.1.41 | chr14:38887933:38925839   | 38890148  | s | AF338234     | 23 | CDS  | 4253   | CTAGE5        | CTAGE family, member 5                                                                                   |
| Hs.509414.1.53 | chr14:55198084:55203711   | 55199667  | s | L25616       | 31 | CDS  | 3895   | KTN1          | kinectin 1 (kinesin receptor)                                                                            |
| Hs.509780.1.23 | chr14:68628143:68611882   | 68625674  | s | NM_003861    | 6  | CDS  | 8816   | WDR22         | WD repeat domain 22                                                                                      |
| Hs.509909.1.19 | chr14:72818819:72815886   | 72817880  | s | NM_001005743 | 11 | CDS  | 8650   | NUMB          | numb homolog (Drosophila)                                                                                |
| Hs.510368.1.11 | chr14:95207578:95226825   | 95209542  | s | AB035341     | 5  | 3UTR | 27004  | TCL6          | T-cell leukemia/lymphoma 6                                                                               |
| Hs.510368.1.12 | chr14:95207578:95226825   | 95213223  | s | AB035341     | 5  | 3UTR | 27004  | TCL6          | T-cell leukemia/lymphoma 6                                                                               |
| Hs.510368.1.13 | chr14:95207578:95226825   | 95214185  | s | AB035341     | 5  | 3UTR | 27004  | TCL6          | T-cell leukemia/lymphoma 6                                                                               |
| Hs.510373.1.17 | chr14:96023147:96024394   | 96024365  | s | NM_152327    | 17 | CDS  | 122481 | AK7           | adenylate kinase 7                                                                                       |
| Hs.510407.1.24 | chr14:98949040:98942681   | 98945905  | s | NM_032233    | 8  | CDS  | 84193  | C14orf154     | chromosome 14 open reading frame 154                                                                     |
| Hs.510989.1.24 | chr15:35163263:35116453   | 35145796  | s | NM_002399    | 7  | CDS  | 4212   | MEIS2         | Meis1, myeloid ecotropic viral integration site 1 homolog 2 (mouse)                                      |
| Hs.511010.1.8  | chr15:36578286:36570182   | 36573918  | s | AY858556     | 14 | CDS  | 10125  | RASGRP1       | RAS guanyl releasing protein 1 (calcium and DAG-regulated)                                               |
| Hs.511138.1.31 | chr15:40340447:40323658   | 40337433  | s | NM_015497    | 6  | CDS  | 25963  | DKFZP564G2022 | DKFZP564G2022 protein                                                                                    |
| Hs.511603.1.7  | chr7:150137041:150141162  | 150138671 | s | NM_000603    | 14 | CDS  | 4846   | NOS3          | nitric oxide synthase 3 (endothelial cell)                                                               |
| Hs.512603.1.17 | chr6:24461775:24410252    | 24461439  | s | NM_016356    | 2  | CDS  | 51473  | DCDC2         | doublecortin domain containing 2                                                                         |
| Hs.512606.1.15 | chr2:238772851:238773888  | 238773887 | s | NM_016510    | 6  | CDS  | 51540  | SCLY          | selenocysteine lyase                                                                                     |
| Hs.512690.1.9  | chr2:85800234:85797637    | 85797645  | s | NM_198843    | 10 | 3UTR | 6439   | SFTPB         | surfactant, pulmonary-associated protein B                                                               |
| Hs.512714.1.11 | chr22:44647514:44639753   | 44643899  | s | NM_058238    | 2  | CDS  | 7477   | WNT7B         | wingless-type MMTV integration site family, member 7B                                                    |
| Hs.512743.1.21 | chr4:101203094:101201521  | 101202023 | s | NM_024920    | 1  | CDS  | 79982  | DNAJB14       | DnaJ (Hsp40) homolog, subfamily B, member 14                                                             |
| Hs.512932.1.58 | chr15:56996425:56992102   | 56993108  | s | NM_017968    | 3  | CDS  | 79811  | FLJ13213      | modulator of estrogen induced transcription                                                              |
| Hs.513100.1.6  | chr15:82948569:82964836   | 82951120  | s | NM_181877    | 2  | CDS  | 54993  | ZSCAN2        | zinc finger and SCAN domain containing 2                                                                 |
| Hs.513100.1.7  | chr15:82948569:82964836   | 82960845  | s | NM_181877    | 2  | CDS  | 54993  | ZSCAN2        | zinc finger and SCAN domain containing 2                                                                 |
| Hs.513102.1.13 | chr15:82982713:82985389   | 82984989  | s | NM_033634    | 4  | 3UTR | 54581  | SCAND2        | SCAN domain containing 2                                                                                 |
| Hs.513262.1.11 | chr1:74548098:74613784    | 74553553  | s | NM_015978    | 17 | CDS  | 51086  | TNNI3K        | TNNI3 interacting kinase                                                                                 |
| Hs.513262.1.13 | chr1:74548098:74613784    | 74596063  | s | NM_015978    | 17 | CDS  | 51086  | TNNI3K        | TNNI3 interacting kinase                                                                                 |
| Hs.513578.1.27 | chr16:48901059:48902098   | 48901934  | s | NM_001114    | 17 | CDS  | 113    | ADCY7         | adenylate cyclase 7                                                                                      |
| Hs.513734.1.10 | chr15:49862318:49877685   | 49864469  | s | NM_014548    | 7  | CDS  | 29767  | TMOD2         | tropomodulin 2 (neuronal)                                                                                |

|                |                          |           |   |           |    |      |        |           |                                                                                                 |
|----------------|--------------------------|-----------|---|-----------|----|------|--------|-----------|-------------------------------------------------------------------------------------------------|
| Hs.513807.1.26 | chr16:87313482:87311525  | 87311624  | s | BC008073  | 2  | 5UTR | 9780   | FAM38A    | family with sequence similarity 38, member A                                                    |
| Hs.514276.1.16 | chr17:43349496:43355326  | 43351230  | s | NM_003110 | 2  | CDS  | 6668   | SP2       | Sp2 transcription factor                                                                        |
| Hs.514480.1.33 | chr17:71158860:71139344  | 71158043  | s | NM_004259 | 8  | CDS  | 9400   | RECQL5    | RecQ protein-like 5                                                                             |
| Hs.514662.1.3  | chr1:109078033:109071842 | 109077724 | s | AK095517  | 12 | CDS  | 254268 | C1orf62   | chromosome 1 open reading frame 62                                                              |
| Hs.514802.1.11 | chr18:31173790:31171733  | 31172848  | s | NM_006965 | 3  | CDS  | 7572   | ZNF24     | zinc finger protein 24 (KOX 17)                                                                 |
| Hs.514819.1.36 | chr17:31008924:31022885  | 31011243  | s | NM_001282 | 14 | CDS  | 163    | AP2B1     | adaptor-related protein complex 2, beta 1 subunit                                               |
| Hs.515009.1.7  | chr17:59940939:59943302  | 59942663  | s | NM_138363 | 4  | CDS  | 90799  | LOC90799  | hypothetical protein BC009518                                                                   |
| Hs.515215.1.15 | chr19:14689546:14702986  | 14691547  | s | BC048107  | 11 | CDS  | 84449  | ZNF333    | zinc finger protein 333                                                                         |
| Hs.515215.1.16 | chr19:14689546:14702986  | 14692765  | s | BC048107  | 11 | CDS  | 84449  | ZNF333    | zinc finger protein 333                                                                         |
| Hs.515215.1.17 | chr19:14689546:14702986  | 14693707  | s | BC048107  | 11 | CDS  | 84449  | ZNF333    | zinc finger protein 333                                                                         |
| Hs.515271.1.11 | chr19:18966174:18963363  | 18965352  | s | AL832488  | 11 | CDS  | 10147  | SFRS14    | splicing factor, arginine/serine-rich 14                                                        |
| Hs.515634.1.2  | chr19:62397182:62408576  | 62398036  | s | NM_003417 | 2  | CDS  | 9422   | ZNF264    | zinc finger protein 264                                                                         |
| Hs.515634.1.3  | chr19:62397182:62408576  | 62398124  | s | NM_003417 | 2  | CDS  | 9422   | ZNF264    | zinc finger protein 264                                                                         |
| Hs.515951.1.28 | chr2:232797:224273       | 229556    | s | NM_015677 | 6  | CDS  | 26751  | SH3YL1    | SH3 domain containing, Ysc84-like 1 (S. cerevisiae)                                             |
| Hs.515985.1.13 | chr2:48618807:48625420   | 48623031  | s | NM_152994 | 13 | CDS  | 129285 | LOC129285 | smooth muscle myosin heavy chain 11 isoform SM1-like                                            |
| Hs.516182.1.52 | chr2:55754237:55742864   | 55753339  | s | NM_020463 | 2  | CDS  | 57223  | KIAA1387  | KIAA1387 protein                                                                                |
| Hs.516341.1.14 | chr2:96689253:96683243   | 96687216  | s | NM_017991 | 20 | CDS  | 55683  | FLJ10081  | hypothetical protein FLJ10081                                                                   |
| Hs.516341.1.29 | chr2:96691860:96690474   | 96691327  | s | NM_017991 | 17 | CDS  | 55683  | FLJ10081  | hypothetical protein FLJ10081                                                                   |
| Hs.516578.1.12 | chr2:188174356:188158166 | 188168818 | s | NM_006287 | 6  | CDS  | 7035   | TFPI      | tissue factor pathway inhibitor (lipoprotein-associated coagulation inhibitor)                  |
| Hs.516697.1.4  | chr2:218961778:219030010 | 218963171 | s | NM_015488 | 2  | CDS  | 25953  | MR-1      | myofibrillogenesis regulator 1                                                                  |
| Hs.516846.1.9  | chr20:2421344:2413303    | 2420487   | s | NM_024325 | 5  | CDS  | 79175  | ZNF343    | zinc finger protein 343                                                                         |
| Hs.516977.1.15 | chr20:30526064:30507860  | 30516248  | s | NM_080616 | 1  | CDS  | 140688 | C20orf112 | chromosome 20 open reading frame 112                                                            |
| Hs.517134.1.8  | chr20:54492653:54521777  | 54512950  | s | NM_016407 | 5  | CDS  | 51507  | C20orf43  | chromosome 20 open reading frame 43                                                             |
| Hs.517717.1.26 | chr3:18431606:18413787   | 18427296  | s | NM_002971 | 5  | CDS  | 6304   | SATB1     | special AT-rich sequence binding protein 1 (binds to nuclear matrix/scaffold-associating DNA's) |
| Hs.517898.1.6  | chr3:38637337:38630330   | 38630523  | s | NM_000335 | 5  | CDS  | 6331   | SCN5A     | sodium channel, voltage-gated, type V, alpha (long QT syndrome 3)                               |
| Hs.517948.1.3  | chr3:47827206:47834515   | 47832676  | s | NM_014966 | 3  | 5UTR | 22907  | DHX30     | DEAH (Asp-Glu-Ala-His) box polypeptide 30                                                       |
| Hs.517948.1.6  | chr3:47827206:47834515   | 47833466  | s | NM_014966 | 3  | 5UTR | 22907  | DHX30     | DEAH (Asp-Glu-Ala-His) box polypeptide 30                                                       |
| Hs.518203.1.22 | chr3:123921926:123929348 | 123922505 | s | NM_017554 | 10 | CDS  | 54625  | PARP14    | poly (ADP-ribose) polymerase family, member 14                                                  |
| Hs.518265.1.10 | chr3:134788265:134789437 | 134788875 | s | NM_017548 | 4  | CDS  | 55573  | H41       | hypothetical protein H41                                                                        |
| Hs.51891.1.47  | chr10:69502645:69474327  | 69498768  | s | NM_015601 | 3  | CDS  | 26091  | HERC4     | hect domain and RLD 4                                                                           |
| Hs.519294.1.76 | chr5:127810072:127772392 | 127805590 | s | NM_001999 | 7  | CDS  | 2201   | FBN2      | fibrillin 2 (congenital contractural arachnodactyly)                                            |
| Hs.519313.1.36 | chr5:132267958:132266079 | 132267452 | s | NM_014423 | 6  | CDS  | 27125  | AFF4      | AF4/FMR2 family, member 4                                                                       |
| Hs.519337.1.49 | chr5:137532809:137531667 | 137531950 | s | NM_139199 | 8  | CDS  | 10902  | BRD8      | bromodomain containing 8                                                                        |
| Hs.519514.1.24 | chr5:114543570:114527349 | 114543698 | s | NM_018700 | 1  | CDS  | 55521  | TRIM36    | tripartite motif-containing 36                                                                  |
| Hs.519602.1.12 | chr5:137492066:137482525 | 137491030 | s | NM_003551 | 4  | CDS  | 8382   | NME5      | non-metastatic cells 5, protein expressed in (nucleoside-diphosphate kinase)                    |
| Hs.519672.1.41 | chr5:149739489:149747657 | 149744005 | s | NM_000356 | 16 | CDS  | 6949   | TCOF1     | Treacher Collins-Franceschetti syndrome 1                                                       |
| Hs.519794.1.8  | chr6:62500545:62465118   | 62468123  | s | NM_152688 | 7  | CDS  | 202559 | KHDRBS2   | KH domain containing, RNA binding, signal transduction associated 2                             |
| Hs.519880.1.13 | chr6:10510710:10508809   | 10508933  | s | NM_003220 | 5  | CDS  | 7020   | TFAP2A    | transcription factor AP-2 alpha (activating enhancer binding protein 2 alpha)                   |
| Hs.519972.1.14 | chr6:29801800:29802638   | 29802273  | s | BC009260  | 6  | CDS  | 3134   | HLA-F     | major histocompatibility complex, class I, F                                                    |
| Hs.520189.1.25 | chr6:53268398:53264721   | 53266859  | s | NM_021814 | 2  | CDS  | 60481  | ELOVL5    | ELOVL family member 5, elongation of long chain fatty acids (FEN1/Elo2, SUR4/Elo3-like, yeast)  |

|                |                           |           |   |              |    |      |        |          |                                                                                 |
|----------------|---------------------------|-----------|---|--------------|----|------|--------|----------|---------------------------------------------------------------------------------|
| Hs.520334.1.12 | chr7:43694497:43692100    | 43693970  | s | NM_017920    | 4  | CDS  | 55665  | URG4     | up-regulated gene 4                                                             |
| Hs.520708.1.20 | chr7:24520985:24519236    | 24520138  | s | NM_004403    | 7  | CDS  | 1687   | DFNA5    | deafness, autosomal dominant 5                                                  |
| Hs.520757.1.2  | chr7:138940410:139025217  | 138950469 | s | BC014117     | 3  | 5UTR | 6916   | TBXAS1   | thromboxane A synthase 1 (platelet, cytochrome P450, family 5, subfamily A)     |
| Hs.520757.1.8  | chr7:139064305:139089173  | 139066636 | s | NM_001061    | 4  | CDS  | 6916   | TBXAS1   | thromboxane A synthase 1 (platelet, cytochrome P450, family 5, subfamily A)     |
| Hs.520814.1.28 | chr7:47224564:47218397    | 47224053  | s | BC071791     | 13 | CDS  | 64759  | TNS3     | tensin 3                                                                        |
| Hs.520819.1.6  | chr7:154528056:154532106  | 154530979 | s | NM_198337    | 2  | CDS  | 3638   | INSIG1   | insulin induced gene 1                                                          |
| Hs.520955.1.19 | chr7:73916286:73914833    | 73915271  | s | NM_030798    | 8  | CDS  | 81554  | WBSCR16  | Williams-Beuren syndrome chromosome region 16                                   |
| Hs.521064.1.12 | chr7:98802970:98814518    | 98806547  | s | NM_001009960 | 2  | CDS  | 79027  | ZNF655   | zinc finger protein 655                                                         |
| Hs.521087.1.25 | chr7:100105101:100107991  | 100107808 | s | NM_020246    | 13 | CDS  | 56996  | SLC12A9  | solute carrier family 12 (potassium/chloride transporters), member 9            |
| Hs.521869.1.15 | chrX:8346008:8331876      | 8343583   | s | NM_000216    | 8  | CDS  | 3730   | KAL1     | Kallmann syndrome 1 sequence                                                    |
| Hs.523329.1.12 | chr1:22954283:22964682    | 22963065  | s | NM_004442    | 6  | CDS  | 2048   | EPHB2    | EPH receptor B2                                                                 |
| Hs.523360.1.19 | chr10:134413340:134429266 | 134417466 | s | NM_005539    | 11 | CDS  | 3632   | INPP5A   | inositol polyphosphate-5-phosphatase, 40kDa                                     |
| Hs.523442.1.18 | chr1:24525301:24527933    | 24526620  | s | NM_020448    | 7  | CDS  | 57185  | NPAL3    | NIPA-like domain containing 3                                                   |
| Hs.523442.1.28 | chr1:24535917:24540781    | 24538134  | s | NM_020448    | 11 | CDS  | 57185  | NPAL3    | NIPA-like domain containing 3                                                   |
| Hs.523446.1.33 | chr1:103179501:103175941  | 103178591 | s | NM_001854    | 24 | CDS  | 1301   | COL11A1  | collagen, type XI, alpha 1                                                      |
| Hs.523772.1.17 | chr1:175795010:175798619  | 175796252 | s | AJ299441     | 5  | CDS  | 64222  | TOR3A    | torsin family 3, member A                                                       |
| Hs.523873.1.68 | chr1:71458535:71451381    | 71453893  | s | Z11584       | 2  | 5UTR | 4926   | NUMA1    | nuclear mitotic apparatus protein 1                                             |
| Hs.524195.1.41 | chr10:24958930:24951698   | 24958459  | s | NM_020824    | 7  | CDS  | 57584  | ARHGAP21 | Rho GTPase activating protein 21                                                |
| Hs.524271.1.23 | chr1:33489094:33468987    | 33487907  | s | NM_198040    | 8  | CDS  | 1912   | PHC2     | polyhomeotic-like 2 (Drosophila)                                                |
| Hs.524513.1.2  | chr12:55443466:55453884   | 55446324  | s | NM_003725    | 1  | 5UTR | 8630   | HSD17B6  | hydroxysteroid (17-beta) dehydrogenase 6                                        |
| Hs.524517.1.43 | chr1:36614126:36610368    | 36611698  | s | NM_000760    | 3  | CDS  | 1441   | CSF3R    | colony stimulating factor 3 receptor (granulocyte)                              |
| Hs.524800.1.32 | chr12:120421507:120413926 | 120416912 | s | NM_001005366 | 9  | CDS  | 84678  | FBXL10   | F-box and leucine-rich repeat protein 10                                        |
| Hs.524809.1.34 | chr12:121362152:121356907 | 121360455 | s | NM_002956    | 8  | CDS  | 6249   | RSN      | restin (Reed-Steinberg cell-expressed intermediate filament-associated protein) |
| Hs.524874.1.20 | chr12:131921320:131917207 | 131920865 | s | BC043157     | 10 | CDS  | 23141  | KIAA0692 | KIAA0692 protein                                                                |
| Hs.525091.1.12 | chr1:45556489:45520726    | 45533498  | s | AK027573     | 3  | CDS  | 10420  | TESK2    | testis-specific kinase 2                                                        |
| Hs.525135.1.7  | chr13:97663669:97794016   | 97695559  | s | NM_005766    | 2  | CDS  | 10160  | FARP1    | FERM, RhoGEF (ARHGEF) and pleckstrin domain protein 1 (chondrocyte-derived)     |
| Hs.525146.1.21 | chr13:100827051:100795773 | 100818893 | s | NM_052867    | 6  | CDS  | 259232 | VGCNL1   | voltage gated channel like 1                                                    |
| Hs.525264.1.8  | chr12:7143423:7140902     | 7142034   | s | NM_016546    | 5  | CDS  | 51279  | C1RL     | complement component 1, r subcomponent-like                                     |
| Hs.525392.1.10 | chr14:63491387:63497995   | 63497372  | s | NM_015180    | 8  | CDS  | 23224  | SYNE2    | spectrin repeat containing, nuclear envelope 2                                  |
| Hs.525549.1.19 | chr14:92829956:92800093   | 92823727  | s | NM_001002860 | 3  | CDS  | 55727  | BTBD7    | BTB (POZ) domain containing 7                                                   |
| Hs.525589.1.22 | chr14:100381624:100396780 | 100382711 | s | AK127864     | 3  | 3UTR | 55384  | MEG3     | maternally expressed 3                                                          |
| Hs.525700.1.6  | chr15:22764323:22770550   | 22765061  | s | NM_003097    | 3  | 5UTR | 6638   | SNRPN    | small nuclear ribonucleoprotein polypeptide N                                   |
| Hs.526464.1.36 | chr15:72113925:72122382   | 72115788  | s | NM_002675    | 7  | CDS  | 5371   | PML      | promyelocytic leukemia                                                          |
| Hs.526500.1.12 | chr16:21040766:21039677   | 21040407  | s | NM_017539    | 10 | CDS  | 55567  | DNAH3    | dynein, axonemal, heavy polypeptide 3                                           |
| Hs.526552.1.4  | chr17:11455823:11461452   | 11456876  | s | NM_001372    | 4  | CDS  | 1770   | DNAH9    | dynein, axonemal, heavy polypeptide 9                                           |
| Hs.527061.1.29 | chr4:3466866:3469102      | 3467298   | s | NM_198587    | 14 | CDS  | 6002   | RGS12    | regulator of G-protein signalling 12                                            |
| Hs.527412.1.20 | chr8:17969008:17966321    | 17968557  | s | NM_004315    | 6  | CDS  | 427    | ASAH1    | N-acylsphingosine amidohydrolase (acid ceramidase) 1                            |
| Hs.527412.1.22 | chr8:17969008:17966321    | 17968676  | s | NM_004315    | 6  | CDS  | 427    | ASAH1    | N-acylsphingosine amidohydrolase (acid ceramidase) 1                            |
| Hs.527653.1.18 | chr1:203901158:203921285  | 203902506 | s | NM_000574    | 9  | CDS  | 1604   | DAF      | decay accelerating factor for complement (CD55, Cromer blood group system)      |
| Hs.527748.1.9  | chr10:126176688:126195738 | 126177073 | s | NM_022126    | 5  | CDS  | 64077  | LHPP     | phospholysine phosphohistidine inorganic pyrophosphate phosphatase              |
| Hs.527862.3.69 | chr16:16345503:16389019   | 16385217  | s | AK124516     | 22 | 3UTR | NA     | NA       | NA                                                                              |

|                |                           |           |   |              |    |      |        |           |                                                             |
|----------------|---------------------------|-----------|---|--------------|----|------|--------|-----------|-------------------------------------------------------------|
| Hs.528382.1.19 | chr12:109063591:109080946 | 109069707 | s | NM_014055    | 11 | CDS  | 28981  | CDV1      | carnitine deficiency-associated, expressed in ventricle 1   |
| Hs.528385.1.10 | chr14:23534183:23543385   | 23539130  | s | AY616183     | 3  | CDS  | 317749 | DHRS4L2   | dehydrogenase/reductase (SDR family) member 4 like 2        |
| Hs.528412.1.2  | chr7:102611205:102587325  | 102608605 | s | NM_206883    | 19 | CDS  | 375611 | PRES      | prestin (motor protein)                                     |
| Hs.528836.1.37 | chr16:55653115:55656624   | 55653414  | s | NM_032206    | 30 | CDS  | 84166  | NOD27     | nucleotide-binding oligomerization domains 27               |
| Hs.528889.1.8  | chr17:17851187:17860102   | 17851867  | s | NM_031294    | 12 | CDS  | 83450  | LRRC48    | leucine rich repeat containing 48                           |
| Hs.529181.1.3  | chr2:30865246:30857754    | 30860941  | s | NM_144575    | 22 | 3UTR | 92291  | CAPN13    | calpain 13                                                  |
| Hs.529340.1.5  | chr20:5701690:5791669     | 5702089   | s | NM_152504    | 2  | CDS  | 149840 | FLJ25067  | hypothetical protein FLJ25067                               |
| Hs.529509.1.17 | chr3:42647813:42649096    | 42647828  | s | NM_001012651 | 10 | 3UTR | 4820   | NKTR      | natural killer-tumor recognition sequence                   |
| Hs.529512.1.11 | chr3:44584930:44599467    | 44588651  | s | NM_025169    | 5  | CDS  | 55888  | ZNF167    | zinc finger protein 167                                     |
| Hs.529680.1.6  | chr4:77657621:77649869    | 77653509  | s | NM_178555    | 8  | CDS  | 339965 | FLJ25770  | hypothetical protein FLJ25770                               |
| Hs.530049.1.11 | chr11:5232097:5226294     | 5231008   | s | BC020719     | 2  | CDS  | 3047   | HBG1      | hemoglobin, gamma A                                         |
| Hs.530084.1.7  | chr7:99581164:99588138    | 99583602  | s | NM_013440    | 3  | 5UTR | 29990  | PILRB     | paired immunoglobulin-like type 2 receptor beta             |
| Hs.530315.1.12 | chr12:122532921:122508964 | 122526742 | s | NM_178314    | 3  | CDS  | 353116 | FLJ39378  | hypothetical protein FLJ39378                               |
| Hs.530438.1.3  | chr11:30856666:30837182   | 30843065  | s | NM_198462    | 28 | 3UTR | 196296 | FLJ46154  | FLJ46154 protein                                            |
| Hs.530727.1.14 | chr11:47450318:47447020   | 47448494  | s | NM_006560    | 13 | 3UTR | 10658  | CUGBP1    | CUG triplet repeat, RNA binding protein 1                   |
| Hs.531642.1.8  | chr16:486861:493004       | 487443    | s | NM_014700    | 6  | CDS  | 9727   | RAB11FIP3 | RAB11 family interacting protein 3 (class II)               |
| Hs.531876.1.6  | chr20:32577810:32586092   | 32582686  | s | NM_014183    | 2  | CDS  | 83658  | DNCL2A    | dynein, cytoplasmic, light polypeptide 2A                   |
| Hs.532161.1.14 | chr6:109583774:109586920  | 109584693 | s | NM_173830    | 7  | CDS  | 285753 | C6orf182  | chromosome 6 open reading frame 182                         |
| Hs.532699.1.29 | chr19:12869678:12871513   | 12870197  | s | NM_013976    | 11 | CDS  | 2639   | GCDH      | glutaryl-Coenzyme A dehydrogenase                           |
| Hs.532699.1.32 | chr19:12869678:12871513   | 12871508  | s | NM_013976    | 11 | CDS  | 2639   | GCDH      | glutaryl-Coenzyme A dehydrogenase                           |
| Hs.532799.1.12 | chr17:57175155:57148207   | 57171200  | s | NM_032043    | 16 | CDS  | 83990  | BRIP1     | BRCA1 interacting protein C-terminal helicase 1             |
| Hs.533040.1.30 | chr5:176852011:176851028  | 176851425 | s | NM_203352    | 4  | CDS  | 9260   | PDLIM7    | PDZ and LIM domain 7 (enigma)                               |
| Hs.533222.1.11 | chr5:61723754:61722567    | 61723301  | s | NM_014473    | 10 | CDS  | 27292  | HSA9761   | dimethyladenosine transferase                               |
| Hs.533499.1.37 | chr9:122719303:122707491  | 122715619 | s | NM_018835    | 6  | CDS  | 54542  | MNAB      | membrane associated DNA binding protein                     |
| Hs.534339.1.2  | chr12:55411631:55411323   | 55411333  | s | NM_000946    | 13 | 3UTR | 5557   | PRIM1     | primase, polypeptide 1, 49kDa                               |
| Hs.534501.1.4  | chr1:175222057:175226162  | 175222604 | s | AK097518     | 8  | CDS  | 84066  | C1orf49   | chromosome 1 open reading frame 49                          |
| Hs.534501.1.5  | chr1:175222057:175226162  | 175223441 | s | AK097518     | 8  | CDS  | 84066  | C1orf49   | chromosome 1 open reading frame 49                          |
| Hs.534501.1.7  | chr1:175222057:175226162  | 175224223 | s | AK097518     | 8  | CDS  | 84066  | C1orf49   | chromosome 1 open reading frame 49                          |
| Hs.534564.1.2  | chr1:43539315:43549845    | 43541658  | s | NM_001012960 | 4  | CDS  | 149469 | C1orf84   | chromosome 1 open reading frame 84                          |
| Hs.535229.1.3  | chr1:170571944:170586430  | 170574428 | s | AK057310     | 3  | CDS  | 84614  | ZBTB37    | zinc finger and BTB domain containing 37                    |
| Hs.5353.1.13   | chr2:201886178:201898303  | 201890958 | s | NM_001230    | 5  | CDS  | 843    | CASP10    | caspase 10, apoptosis-related cysteine protease             |
| Hs.5353.1.21   | chr2:201899792:201919161  | 201910241 | s | NM_032974    | 9  | CDS  | 843    | CASP10    | caspase 10, apoptosis-related cysteine protease             |
| Hs.535845.1.2  | chr6:45404500:45498307    | 45447763  | s | NM_001015051 | 2  | CDS  | 860    | RUNX2     | runt-related transcription factor 2                         |
| Hs.536490.1.4  | chr18:70622447:70718140   | 70645571  | s | NM_017757    | 3  | CDS  | 55628  | ZNF407    | zinc finger protein 407                                     |
| Hs.546311.1.4  | chr4:328220:356452        | 342339    | s | NM_003441    | 3  | CDS  | 7700   | ZNF141    | zinc finger protein 141 (clone pHZ-44)                      |
| Hs.546327.1.32 | chr14:91569288:91561518   | 91566477  | s | NM_004239    | 2  | CDS  | 9321   | TRIP11    | thyroid hormone receptor interactor 11                      |
| Hs.546342.1.7  | chr10:12252721:12249817   | 12251727  | s | NM_014142    | 9  | CDS  | 11164  | NUDT5     | nudix (nucleoside diphosphate linked moiety X)-type motif 5 |
| Hs.546344.1.13 | chrX:21387393:21426605    | 21420505  | s | NM_014927    | 20 | CDS  | 22866  | CNKSR2    | connector enhancer of kinase suppressor of Ras 2            |
| Hs.546385.1.4  | chr7:114213788:114249692  | 114214090 | s | NM_199072    | 4  | CDS  | 29969  | MDFIC     | MyoD family inhibitor domain containing                     |
| Hs.546404.1.24 | chr11:46471733:46421725   | 46469124  | s | NM_017749    | 12 | CDS  | 55626  | FLJ20294  | hypothetical protein FLJ20294                               |
| Hs.546421.1.14 | chr10:73076381:73104874   | 73077667  | s | NM_022124    | 14 | CDS  | 64072  | CDH23     | cadherin-like 23                                            |
| Hs.546501.1.6  | chr3:27272790:27219053    | 27232101  | s | NM_152534    | 6  | CDS  | 152110 | NEK10     | NIMA (never in mitosis gene a)- related kinase 10           |
| Hs.546501.1.7  | chr3:27272790:27232376    | 27271607  | s | AK123061     | 24 | CDS  | 152110 | NEK10     | NIMA (never in mitosis gene a)- related kinase 10           |
| Hs.546509.1.10 | chrX:100572188:100592775  | 100578086 | s | NM_152583    | 11 | 3UTR | 158947 | ARMCX4    | armadillo repeat containing, X-linked 4                     |
| Hs.546537.1.10 | chr8:95821195:95837439    | 95826382  | s | NM_181787    | 6  | CDS  | 286148 | DPY19L4   | dpy-19-like 4 (C. elegans)                                  |



|                |                           |           |   |              |    |      |        |           |                                                                                                                |
|----------------|---------------------------|-----------|---|--------------|----|------|--------|-----------|----------------------------------------------------------------------------------------------------------------|
| Hs.546537.1.11 | chr8:95821195:95837439    | 95826488  | s | NM_181787    | 6  | CDS  | 286148 | DPY19L4   | dpy-19-like 4 (C. elegans)                                                                                     |
| Hs.549027.1.13 | chr12:39639304:39660977   | 39652502  | s | NM_001843    | 15 | CDS  | 1272   | CNTN1     | contactin 1                                                                                                    |
| Hs.549042.1.18 | chr21:33554903:33556967   | 33556932  | s | NM_207585    | 8  | CDS  | 3455   | IFNAR2    | interferon (alpha, beta and omega) receptor 2                                                                  |
| Hs.549079.1.4  | chr7:71886910:72190310    | 71888325  | s | NM_003602    | 4  | CDS  | 8468   | FKBP6     | FK506 binding protein 6, 36kDa                                                                                 |
| Hs.549092.1.19 | chr8:53484440:53305191    | 53478814  | s | NM_014682    | 2  | 5UTR | 9705   | ST18      | suppression of tumorigenicity 18 (breast carcinoma) (zinc finger protein)                                      |
| Hs.549101.1.22 | chr6:123893349:123879051  | 123891527 | s | NM_006073    | 5  | CDS  | 10345  | TRDN      | triadin                                                                                                        |
| Hs.549154.1.11 | chr9:37773910:37770878    | 37771972  | s | NM_001002269 | 2  | CDS  | 51010  | EXOSC3    | exosome component 3                                                                                            |
| Hs.549159.1.6  | chr17:42003440:41949916   | 41986721  | s | NM_016632    | 3  | CDS  | 51326  | LOC51326  | ADP-ribosylation factor-like                                                                                   |
| Hs.549159.1.8  | chr17:42003440:41949916   | 41989935  | s | NM_016632    | 3  | CDS  | 51326  | LOC51326  | ADP-ribosylation factor-like                                                                                   |
| Hs.549163.1.10 | chr16:76755688:77803005   | 76870096  | s | NM_130788    | 5  | CDS  | 51741  | WVVOX     | WW domain containing oxidoreductase                                                                            |
| Hs.549169.1.16 | chr6:34947681:34955763    | 34948467  | s | NM_017754    | 20 | CDS  | 54887  | C6orf107  | chromosome 6 open reading frame 107                                                                            |
| Hs.549178.1.15 | chr9:137002660:137006030  | 137004522 | s | NM_024718    | 7  | CDS  | 55684  | C9orf86   | chromosome 9 open reading frame 86                                                                             |
| Hs.549178.1.17 | chr9:137002660:137006030  | 137004631 | s | NM_024718    | 7  | CDS  | 55684  | C9orf86   | chromosome 9 open reading frame 86                                                                             |
| Hs.549184.1.6  | chr3:64482881:64477838    | 64482197  | s | NM_182920    | 39 | 3UTR | 56999  | ADAMTS9   | a disintegrin-like and metalloprotease (repolysin type) with thrombospondin type 1 motif, 9                    |
| Hs.549215.1.20 | chr11:125937939:125901793 | 125924388 | s | NM_032531    | 2  | CDS  | 84623  | KIRREL3   | kin of IRRE like 3 (Drosophila)                                                                                |
| Hs.549215.1.22 | chr11:125937939:125901793 | 125924644 | s | NM_032531    | 2  | CDS  | 84623  | KIRREL3   | kin of IRRE like 3 (Drosophila)                                                                                |
| Hs.549231.1.6  | chr10:135257735:135256714 | 135257375 | s | NM_130784    | 12 | CDS  | 93426  | C10orf94  | chromosome 10 open reading frame 94                                                                            |
| Hs.550535.1.2  | chr1:2321032:2300452      | 2318776   | s | NM_024848    | 10 | CDS  | 79906  | FLJ13941  | hypothetical protein FLJ13941                                                                                  |
| Hs.550535.1.9  | chr1:2348578:2338159      | 2342596   | s | NM_024848    | 6  | CDS  | 79906  | FLJ13941  | hypothetical protein FLJ13941                                                                                  |
| Hs.550589.1.33 | chr17:38711330:38717445   | 38717402  | s | NM_031858    | 20 | CDS  | 4077   | NBR1      | neighbor of BRCA1 gene 1                                                                                       |
| Hs.550590.1.3  | chr10:89115543:89117070   | 89116932  | s | NM_001009610 | 6  | CDS  | 283008 | FAM22A    | family with sequence similarity 22, member A                                                                   |
| Hs.55131.1.18  | chr3:44374373:44377860    | 44376296  | s | NM_173826    | 3  | CDS  | 285343 | C3orf23   | chromosome 3 open reading frame 23                                                                             |
| Hs.551518.1.9  | chr17:5179364:5182037     | 5180709   | s | NM_004703    | 4  | CDS  | 9135   | RABEP1    | rabaptin, RAB GTPase binding effector protein 1                                                                |
| Hs.551583.1.7  | chr5:54504172:54478442    | 54500626  | s | NM_152623    | 2  | CDS  | 166979 | FLJ37927  | CDC20-like protein                                                                                             |
| Hs.552571.1.7  | chr4:5876162:5903350      | 5878110   | s | NM_014556    | 11 | CDS  | 2121   | EVC       | Ellis van Creveld syndrome                                                                                     |
| Hs.552580.1.22 | chr2:242123386:242127544  | 242125433 | s | NM_014808    | 17 | CDS  | 9855   | FARP2     | FERM, RhoGEF and pleckstrin domain protein 2<br>similar to hepatocellular carcinoma-associated antigen HCA557b |
| Hs.552610.1.13 | chr2:208312035:208272391  | 208302973 | s | BC009462     | 3  | CDS  | 151194 | LOC151194 | thioredoxin domain containing 6                                                                                |
| Hs.552621.1.3  | chr3:139505046:139464127  | 139502741 | s | NM_178130    | 11 | CDS  | 347736 | TXNDC6    | thioredoxin domain containing 6                                                                                |
| Hs.553496.1.14 | chr6:83936742:83935762    | 83935959  | s | NM_015599    | 12 | CDS  | 5238   | PGM3      | phosphoglucomutase 3                                                                                           |
| Hs.553523.1.10 | chr19:11283899:11298469   | 11287642  | s | NM_012466    | 6  | CDS  | 26526  | TSPAN16   | tetraspanin 16                                                                                                 |
| Hs.553529.1.3  | chr9:99968387:100067898   | 99972740  | s | NM_014425    | 3  | CDS  | 27130  | INVS      | inversin                                                                                                       |
| Hs.553530.1.9  | chr22:21800766:21730866   | 21797918  | s | NM_014433    | 4  | CDS  | 27156  | RTDR1     | rhabdoid tumor deletion region gene 1                                                                          |
| Hs.553542.1.4  | chr5:111532334:111522039  | 111528597 | s | AK096057     | 11 | CDS  | 64097  | EPB41L4A  | erythrocyte membrane protein band 4.1 like 4A                                                                  |
| Hs.553617.1.6  | chr15:47587699:47450889   | 47502004  | s | NM_152647    | 11 | CDS  | 196951 | FLJ32800  | hypothetical protein FLJ32800                                                                                  |
| Hs.553938.1.3  | chr21:39903379:39891787   | 39899396  | s | NM_153754    | 2  | CDS  | 114041 | C21orf88  | chromosome 21 open reading frame 88                                                                            |
| Hs.553981.1.1  | chr8_random:825059:859263 | 842296    | s | AK097091     | 5  | CDS  | 11042  | SMA5      | SMA5                                                                                                           |
| Hs.554734.1.13 | chrX:85039915:85025203    | 85030244  | s | NM_000390    | 4  | CDS  | 1121   | CHM       | choroideremia (Rab escort protein 1)                                                                           |
| Hs.554734.1.14 | chrX:85039915:85025203    | 85030800  | s | NM_000390    | 4  | CDS  | 1121   | CHM       | choroideremia (Rab escort protein 1)                                                                           |
| Hs.554747.1.26 | chr15:40390337:40401274   | 40394323  | s | NM_198141    | 10 | CDS  | 2595   | GANC      | glucosidase, alpha; neutral C                                                                                  |
| Hs.554769.1.14 | chr11:111117986:111113504 | 111117312 | s | NM_181699    | 15 | CDS  | 5519   | PPP2R1B   | protein phosphatase 2 (formerly 2A), regulatory subunit A (PR 65), beta isoform                                |
| Hs.554769.1.15 | chr11:111117986:111113504 | 111117349 | s | NM_181699    | 15 | CDS  | 5519   | PPP2R1B   | protein phosphatase 2 (formerly 2A), regulatory subunit A (PR 65), beta isoform                                |
| Hs.554769.1.9  | chr11:111117986:111113504 | 111117026 | s | NM_181699    | 15 | CDS  | 5519   | PPP2R1B   | protein phosphatase 2 (formerly 2A), regulatory subunit A (PR 65), beta isoform                                |
| Hs.554787.1.13 | chr15:22764323:22770550   | 22765061  | s | NM_005678    | 3  | 3UTR | 8926   | SNURF     | SNRPN upstream reading frame                                                                                   |
| Hs.554789.1.13 | chr18:3719134:3572247     | 3698346   | s | NM_001003809 | 4  | CDS  | 9229   | DLGAP1    | discs, large (Drosophila) homolog-associated protein 1                                                         |

|                |                           |           |   |              |    |      |        |           |                                                                                            |
|----------------|---------------------------|-----------|---|--------------|----|------|--------|-----------|--------------------------------------------------------------------------------------------|
| Hs.554818.1.2  | chr21:44753509:44749193   | 44752818  | s | NM_144991    | 10 | CDS  | 54084  | C21orf29  | chromosome 21 open reading frame 29                                                        |
| Hs.554831.1.41 | chr2:128236865:128200582  | 128209224 | s | NM_018383    | 7  | CDS  | 55339  | WDR33     | WD repeat domain 33                                                                        |
| Hs.554897.1.11 | chr15:34789455:34887816   | 34826734  | s | NM_032499    | 11 | CDS  | 84529  | HH114     | hypothetical protein HH114                                                                 |
| Hs.554916.1.2  | chr17:73698737:73710174   | 73705236  | s | NM_001010982 | 2  | CDS  | 125061 | AFMID     | arylformamidase                                                                            |
| Hs.554922.1.12 | chr2:61150550:61147802    | 61148634  | s | NM_144709    | 2  | CDS  | 150962 | FLJ32312  | hypothetical protein FLJ32312                                                              |
| Hs.554929.1.3  | chr13:27120591:27137822   | 27123681  | s | NM_152705    | 2  | CDS  | 219404 | MGC9850   | hypothetical protein MGC9850                                                               |
| Hs.554940.1.9  | chr6:42961800:42961971    | 42961965  | s | NM_198486    | 4  | CDS  | 285855 | RPL7L1    | ribosomal protein L7-like 1                                                                |
| Hs.554968.1.1  | chr19:24081286:24100895   | 24081994  | s | NM_203282    | 4  | CDS  | 399655 | ZNF539    | zinc finger protein 539                                                                    |
| Hs.59504.1.13  | chr9:124897708:124871573  | 124894050 | s | NM_173690    | 4  | CDS  | 286205 | C9orf126  | chromosome 9 open reading frame 126                                                        |
| Hs.59506.1.4   | chr9:1043825:1046215      | 1045872   | s | NM_181872    | 2  | CDS  | 10655  | DMRT2     | doublesex and mab-3 related transcription factor 2                                         |
| Hs.61307.1.4   | chr4:141648068:141572183  | 141639441 | s | AK095554     | 2  | CDS  | NA     | NA        | NA                                                                                         |
| Hs.61307.1.5   | chr4:141648068:141572183  | 141639582 | s | AK095554     | 2  | CDS  | NA     | NA        | NA                                                                                         |
| Hs.61438.1.14  | chrX:37914425:37912923    | 37913801  | s | AJ238395     | 10 | CDS  | 6103   | RPGR      | retinitis pigmentosa GTPase regulator                                                      |
| Hs.62022.1.5   | chr7:107263438:107258575  | 107260966 | s | NM_007356    | 33 | CDS  | 22798  | LAMB4     | laminin, beta 4                                                                            |
| Hs.65551.1.26  | chr20:31358455:31361174   | 31359440  | s | NM_033197    | 15 | CDS  | 92747  | C20orf114 | chromosome 20 open reading frame 114                                                       |
| Hs.65756.1.12  | chr16:262862:261570       | 261827    | s | NM_003834    | 9  | CDS  | 8786   | RGS11     | regulator of G-protein signalling 11                                                       |
| Hs.68876.1.3   | chr3:3108907:3093312      | 3106868   | s | NM_000564    | 10 | CDS  | 3568   | IL5RA     | interleukin 5 receptor, alpha                                                              |
| Hs.74615.1.26  | chr4:54987578:54992465    | 54989070  | s | NM_006206    | 16 | CDS  | 5156   | PDGFRA    | platelet-derived growth factor receptor, alpha polypeptide                                 |
| Hs.76781.1.10  | chr1:94655893:94658040    | 94656300  | s | NM_002858    | 8  | CDS  | 5825   | ABCD3     | ATP-binding cassette, sub-family D (ALD), member 3                                         |
| Hs.77348.1.17  | chr4:175791428:175787976  | 175789106 | s | X82460       | 5  | CDS  | 3248   | HPGD      | hydroxyprostaglandin dehydrogenase 15-(NAD)                                                |
| Hs.78060.1.28  | chr16:46202333:46232446   | 46210841  | s | NM_000293    | 14 | CDS  | 5257   | PHKB      | phosphorylase kinase, beta                                                                 |
| Hs.78065.1.37  | chr5:41015769:41017250    | 41016213  | s | NM_000587    | 17 | CDS  | 730    | C7        | complement component 7                                                                     |
| Hs.79353.1.1   | chr13:113288166:113313311 | 113288480 | s | NM_007111    | 2  | CDS  | 7027   | TFDP1     | transcription factor Dp-1                                                                  |
| Hs.8004.1.31   | chr3:125697951:125719936  | 125701793 | s | NM_003947    | 33 | CDS  | 8997   | KALRN     | kalirin, RhoGEF kinase                                                                     |
| Hs.80305.1.5   | chr10:98978893:98914638   | 98975129  | s | AY336750     | 11 | CDS  | 84986  | ARHGAP19  | Rho GTPase activating protein 19                                                           |
| Hs.80642.1.20  | chr2:191836844:191766558  | 191821723 | s | NM_003151    | 3  | CDS  | 6775   | STAT4     | signal transducer and activator of transcription 4                                         |
| Hs.80741.1.32  | chr13:99899561:99965681   | 99942072  | s | NM_000282    | 21 | CDS  | 5095   | PCCA      | propionyl Coenzyme A carboxylase, alpha polypeptide                                        |
| Hs.8086.1.20   | chr18:13744147:13752037   | 13750279  | s | AB022605     | 10 | CDS  | 8731   | RNMT      | RNA (guanine-7-) methyltransferase                                                         |
| Hs.81337.1.5   | chr17:22991927:22993390   | 22992176  | s | NM_002308    | 3  | CDS  | 3965   | LGALS9    | lectin, galactoside-binding, soluble, 9 (galectin 9)                                       |
| Hs.82002.1.7   | chr13:77371994:77368695   | 77370196  | s | NM_003991    | 6  | CDS  | 1910   | EDNRB     | endothelin receptor type B                                                                 |
| Hs.82002.1.9   | chr13:77371994:77368695   | 77370331  | s | NM_003991    | 6  | CDS  | 1910   | EDNRB     | endothelin receptor type B                                                                 |
| Hs.85962.1.9   | chr16:67704947:67709758   | 67709057  | s | NM_138612    | 3  | CDS  | 3038   | HAS3      | hyaluronan synthase 3                                                                      |
| Hs.86970.1.10  | chr8:117851787:117867922  | 117853360 | s | AK055279     | 2  | CDS  | 84294  | MGC14595  | hypothetical protein MGC14595                                                              |
| Hs.8752.1.10   | chr12:54994901:54991466   | 54992642  | s | NM_014255    | 3  | CDS  | 10330  | TMEM4     | transmembrane protein 4                                                                    |
| Hs.88663.1.2   | chr6:49548531:49556622    | 49554021  | s | NM_018132    | 5  | CDS  | 55166  | C6orf139  | chromosome 6 open reading frame 139                                                        |
| Hs.89387.1.10  | chr10:119801698:119956023 | 119849635 | s | NM_201377    | 3  | 5UTR | 255082 | CASC2     | cancer susceptibility candidate 2                                                          |
| Hs.89387.1.3   | chr10:119801698:119956023 | 119847861 | s | NM_201377    | 3  | 5UTR | 255082 | CASC2     | cancer susceptibility candidate 2                                                          |
| Hs.89387.1.9   | chr10:119801698:119956023 | 119849359 | s | NM_201377    | 3  | 5UTR | 255082 | CASC2     | cancer susceptibility candidate 2                                                          |
| Hs.8944.1.26   | chr3:144049756:144044589  | 144048205 | s | NM_013363    | 3  | CDS  | 26577  | PCOLCE2   | procollagen C-endopeptidase enhancer 2                                                     |
| Hs.89605.1.4   | chr15:76680649:76672589   | 76674706  | s | BC006114     | 5  | CDS  | 1136   | CHRNA3    | cholinergic receptor, nicotinic, alpha polypeptide 3                                       |
| Hs.89655.1.45  | chr2:219997670:219994059  | 219997245 | s | NM_002846    | 3  | CDS  | 5798   | PTPRN     | protein tyrosine phosphatase, receptor type, N                                             |
| Hs.89771.1.1   | chr2:27635748:27638031    | 27636348  | s | NM_001486    | 8  | CDS  | 2646   | GCKR      | glucokinase (hexokinase 4) regulator                                                       |
| Hs.89890.1.31  | chr11:66387820:66377431   | 66384477  | s | NM_000920    | 11 | CDS  | 5091   | PC        | pyruvate carboxylase                                                                       |
| Hs.89983.1.8   | chr3:188450740:188444112  | 188447308 | s | NM_001879    | 8  | CDS  | 5648   | MASP1     | mannan-binding lectin serine protease 1 (C4/C2 activating component of Ra-reactive factor) |

|               |                           |           |   |           |    |      |        |          |                                                              |
|---------------|---------------------------|-----------|---|-----------|----|------|--------|----------|--------------------------------------------------------------|
| Hs.9029.1.17  | chr17:36341150:36338386   | 36339454  | s | NM_173213 | 2  | 5UTR | 25984  | KRT23    | keratin 23 (histone deacetylase inducible)                   |
| Hs.90458.1.29 | chr9:91921852:91909936    | 91920901  | s | NM_006415 | 5  | CDS  | 10558  | SPTLC1   | serine palmitoyltransferase, long chain base subunit 1       |
| Hs.90458.1.32 | chr9:91921852:91909936    | 91921206  | s | NM_006415 | 5  | CDS  | 10558  | SPTLC1   | serine palmitoyltransferase, long chain base subunit 1       |
| Hs.94542.1.18 | chr14:77230833:77216067   | 77221122  | s | NM_006020 | 3  | CDS  | 8846   | ALKBH    | alkB, alkylation repair homolog (E. coli)                    |
| Hs.9597.1.11  | chr9:131434068:131430919  | 131433885 | s | BC015547  | 4  | CDS  | 83549  | UCK1     | uridine-cytidine kinase 1                                    |
| Hs.96513.1.16 | chr2:234178884:234176624  | 234178332 | s | NM_018218 | 26 | CDS  | 55230  | USP40    | ubiquitin specific protease 40                               |
| Hs.96530.1.9  | chr17:50395665:50395276   | 50395281  | s | NM_004375 | 3  | CDS  | 1353   | COX11    | COX11 homolog, cytochrome c oxidase assembly protein (yeast) |
| Hs.97432.1.19 | chr2:46149308:46224997    | 46149710  | s | NM_005400 | 10 | CDS  | 5581   | PRKCE    | protein kinase C, epsilon                                    |
| Hs.97432.1.9  | chr2:45981854:46115218    | 45984547  | s | NM_005400 | 2  | CDS  | 5581   | PRKCE    | protein kinase C, epsilon                                    |
| Hs.98188.1.2  | chr12:118329288:118372518 | 118334159 | s | NM_178499 | 2  | CDS  | 160777 | MGC39827 | hypothetical protein MGC39827                                |
| Hs.98262.1.7  | chr6:102240922:102354215  | 102299711 | s | NM_021956 | 6  | CDS  | 2898   | GRIK2    | glutamate receptor, ionotropic, kainate 2                    |
| Hs.99141.1.18 | chr7:50927071:50885599    | 50912734  | s | NM_015198 | 7  | CDS  | 23242  | COBL     | cordon-bleu homolog (mouse)                                  |
| Hs.99195.1.30 | chr4:22098777:22091707    | 22092086  | s | NM_145290 | 12 | CDS  | 166647 | GPR125   | G protein-coupled receptor 125                               |
